# Supplementary material for: Sustainable Protocol for the Synthesis of 2′,3′-Dideoxynucleoside and 2′,3′-Didehydro-2′,3′-dideoxynucleoside Derivatives
Source: MDPI journal article supplement (doi:10.3390/molecules27133993), 2022-06-21

# Sustainable Protocol for the Synthesis of 2',3'-Dideoxynucleoside and 2',3'-Didehydro-2',3'-dideoxynucleoside Derivatives

Virginia Martín-Nieves,<sup>1</sup> Yogesh S. Sanghvi,<sup>2</sup> Susana Fernández,<sup>1,\*</sup> and Miguel Ferrero<sup>1,\*</sup>

<sup>1</sup>*Departamento de Química Orgánica e Inorgánica, Universidad de Oviedo, Avenida Julián de Clavería 8, 33006-Oviedo (Asturias), Spain*

<sup>2</sup>*Rasayan Inc., 2802 Crystal Ridge Road, Encinitas, CA 92024-6615, USA*

S.F.: fernandezgsusana@uniovi.es; M.F.: mferrero@uniovi.es

## SUPPORTING INFORMATION (page 1 of 162 pages)

### Table of Contents

#### NMR DATA OF COMPOUNDS:

|                                                              |       |
|--------------------------------------------------------------|-------|
| Compound <b>2a</b> – <b>2f</b> .....                         | S3    |
| Compound <b>5a</b> – <b>5f</b> .....                         | S3-S4 |
| Compound <b>6a</b> – <b>6f</b> .....                         | S4-S5 |
| Compound <b>7a</b> – <b>7f</b> .....                         | S5-S6 |
| Compound <b>8a</b> – <b>8b</b> , <b>8d</b> – <b>8f</b> ..... | S6    |
| Compound <b>9a</b> – <b>9c</b> , <b>9e</b> – <b>9f</b> ..... | S6-S7 |

#### COPIES OF 1D AND 2D NMR SPECTRA OF COMPOUNDS:

|                                                                                         |         |
|-----------------------------------------------------------------------------------------|---------|
| Compound <b>2a</b> ( <sup>1</sup> H, <sup>13</sup> C, DEPT, COSY, HSQC NMR) .....       | S8-S12  |
| Compound <b>2b</b> ( <sup>1</sup> H, <sup>13</sup> C, DEPT, COSY, HSQC NMR) .....       | S13-S17 |
| Compound <b>2c</b> ( <sup>1</sup> H, <sup>13</sup> C, DEPT, COSY, HSQC NMR) .....       | S18-S22 |
| Compound <b>2d</b> ( <sup>1</sup> H, <sup>13</sup> C, DEPT, COSY, HSQC, HMBC NMR) ..... | S23-S28 |
| Compound <b>2e</b> ( <sup>1</sup> H, <sup>13</sup> C, DEPT, COSY, HSQC, HMBC NMR) ..... | S29-S34 |
| Compound <b>2f</b> ( <sup>1</sup> H, <sup>13</sup> C, DEPT, COSY, HSQC, HMBC NMR) ..... | S35-S40 |
| Compound <b>5a</b> ( <sup>1</sup> H, <sup>13</sup> C NMR) .....                         | S41-S42 |
| Compound <b>5b</b> ( <sup>1</sup> H, <sup>13</sup> C NMR) .....                         | S43-S44 |
| Compound <b>5c</b> ( <sup>1</sup> H, <sup>13</sup> C NMR) .....                         | S45-S46 |
| Compound <b>5d</b> ( <sup>1</sup> H, <sup>13</sup> C, DEPT, HSQC NMR) .....             | S47-S50 |
| Compound <b>5e</b> ( <sup>1</sup> H, <sup>13</sup> C NMR) .....                         | S51-S52 |
| Compound <b>5f</b> ( <sup>1</sup> H, <sup>13</sup> C, DEPT, COSY, HSQC, HMBC NMR) ..... | S53-S58 |

|                                                                                         |           |
|-----------------------------------------------------------------------------------------|-----------|
| Compound <b>6a</b> ( $^1\text{H}$ , $^{13}\text{C}$ , DEPT, COSY, HSQC NMR) .....       | S59-S63   |
| Compound <b>6b</b> ( $^1\text{H}$ , $^{13}\text{C}$ , DEPT, COSY, HSQC NMR) .....       | S64-S68   |
| Compound <b>6c</b> ( $^1\text{H}$ , $^{13}\text{C}$ , DEPT, COSY, HSQC NMR) .....       | S69-S73   |
| Compound <b>6d</b> ( $^1\text{H}$ , $^{13}\text{C}$ , DEPT, COSY, HSQC NMR) .....       | S74-S78   |
| Compound <b>6e</b> ( $^1\text{H}$ , $^{13}\text{C}$ , DEPT, COSY, HSQC, HMBC NMR).....  | S79-S84   |
| Compound <b>6f</b> ( $^1\text{H}$ , $^{13}\text{C}$ , DEPT, COSY, HSQC NMR) .....       | S85-S89   |
|                                                                                         |           |
| Compound <b>7a</b> ( $^1\text{H}$ , $^{13}\text{C}$ NMR) .....                          | S90-S91   |
| Compound <b>7b</b> ( $^1\text{H}$ , $^{13}\text{C}$ , HSQC NMR).....                    | S92-S94   |
| Compound <b>7c</b> ( $^1\text{H}$ , $^{13}\text{C}$ , DEPT, COSY, HSQC, HMBC NMR).....  | S95-S100  |
| Compound <b>7d</b> ( $^1\text{H}$ , $^{13}\text{C}$ , DEPT, COSY, HSQC, HMBC NMR) ..... | S101-S106 |
| Compound <b>7e</b> ( $^1\text{H}$ , $^{13}\text{C}$ , DEPT, COSY, HSQC NMR) .....       | S107-S111 |
| Compound <b>7f</b> ( $^1\text{H}$ , $^{13}\text{C}$ , COSY, HSQC NMR).....              | S112-S115 |
|                                                                                         |           |
| Compound <b>8a</b> ( $^1\text{H}$ , $^{13}\text{C}$ , DEPT, COSY, HSQC NMR) .....       | S116-S120 |
| Compound <b>8b</b> ( $^1\text{H}$ , $^{13}\text{C}$ NMR) .....                          | S121-S122 |
| Compound <b>8d</b> ( $^1\text{H}$ , $^{13}\text{C}$ , DEPT, COSY, HSQC, HMBC NMR) ..... | S123-S128 |
| Compound <b>8e</b> ( $^1\text{H}$ , $^{13}\text{C}$ NMR) .....                          | S129-S130 |
| Compound <b>8f</b> ( $^1\text{H}$ , $^{13}\text{C}$ , COSY, HSQC, HMBC NMR) .....       | S131-S135 |
|                                                                                         |           |
| Compound <b>9a</b> ( $^1\text{H}$ , $^{13}\text{C}$ , DEPT, COSY, HSQC NMR) .....       | S136-S140 |
| Compound <b>9b</b> ( $^1\text{H}$ , $^{13}\text{C}$ , DEPT, COSY, HSQC NMR) .....       | S141-S145 |
| Compound <b>9c</b> ( $^1\text{H}$ , $^{13}\text{C}$ , DEPT, COSY, HSQC, HMBC NMR).....  | S146-S151 |
| Compound <b>9e</b> ( $^1\text{H}$ , $^{13}\text{C}$ , DEPT, COSY, HSQC, HMBC NMR).....  | S152-S157 |
| Compound <b>9f</b> ( $^1\text{H}$ , $^{13}\text{C}$ , COSY, HSQC, HMBC NMR) .....       | S158-S162 |

5'-O-Levulinyl- $\beta$ -D-uridine (**2a**).  $^1\text{H-NMR}$  (300.13 MHz,  $\text{CDCl}_3$ ):  $\delta$  2.18 (s, 3H, *Me*-Lev), 2.58 (t, 2H,  $\text{CH}_2$ -Lev,  $J = 6.2$  Hz), 2.78 (t, 2H,  $\text{CH}_2$ -Lev,  $J = 6.0$  Hz), 4.19 (m, 1H,  $\text{H}_3$ ), 4.27 (m, 2H,  $\text{H}_2 + \text{H}_4$ ), 4.36 (m, 2H,  $\text{H}_5$ ), 5.78 (d, 1H,  $\text{H}_5$ ,  $J = 8.1$  Hz), 5.82 (d, 1H,  $\text{H}_1$ ,  $J = 3.6$  Hz), 7.66 (d, 1H,  $\text{H}_6$ ,  $J = 8.1$  Hz) ppm.  $^{13}\text{C-NMR}$  (75.5 MHz,  $\text{CDCl}_3$ ):  $\delta$  28.0 ( $\text{CH}_2$ -Lev), 29.9 ( $\text{CH}_3$ -Lev), 38.0 ( $\text{CH}_2$ -Lev), 63.6 ( $\text{C}_5'$ ), 70.3 ( $\text{C}_3'$ ), 75.0 ( $\text{C}_2'$ ), 82.3 ( $\text{C}_4'$ ), 90.6 ( $\text{C}_1'$ ), 102.7 ( $\text{C}_5$ ), 140.5 ( $\text{C}_6$ ), 151.4 ( $\text{C}_2$ ), 164.2 ( $\text{C}_4$ ), 172.8 (CO-Lev), 207.6 (CO-Lev) ppm.

5'-O-Levulinyl- $\beta$ -D-5-methyluridine (**2b**).  $^1\text{H-NMR}$  (300.13 MHz,  $\text{CDCl}_3$ ):  $\delta$  1.88 (s, 3H, *Me*), 2.19 (s, 3H, *Me*-Lev), 2.59 (t, 2H,  $\text{CH}_2$ -Lev,  $J = 6.3$ ), 2.80 (t, 2H,  $\text{CH}_2$ -Lev,  $J = 6.3$ ), 4.19 (m, 1H,  $\text{H}_3$ ), 4.23-4.37 (several m, 3H,  $\text{H}_2 + \text{H}_4 + \text{H}_5$ ), 4.45 (dd, 1H,  $\text{H}_5$ ,  $J = 12.3, 3.7$  Hz), 5.84 (d, 1H,  $\text{H}_1$ ,  $J = 3.7$  Hz), 7.41 (s, 1H,  $\text{H}_6$ ) ppm.  $^{13}\text{C-NMR}$  (75.5 MHz,  $\text{MeOH-}d_4$ ):  $\delta$  12.5 ( $\text{CH}_3$ ), 28.9 ( $\text{CH}_2$ -Lev), 29.6 ( $\text{CH}_3$ -Lev), 38.6 ( $\text{CH}_2$ -Lev), 64.8 ( $\text{C}_5'$ ), 71.3 ( $\text{C}_3'$ ), 74.9 ( $\text{C}_2'$ ), 83.1 ( $\text{C}_4'$ ), 91.1 ( $\text{C}_1'$ ), 111.8 ( $\text{C}_5$ ), 138.0 ( $\text{C}_6$ ), 152.5 ( $\text{C}_2$ ), 166.3 ( $\text{C}_4$ ), 174.2 (CO-Lev), 209.5 (CO-Lev) ppm.

5'-O-Levulinyl- $\beta$ -D-cytidine (**2c**).  $^1\text{H-NMR}$  (300.13 MHz,  $\text{MeOH-}d_4$ ):  $\delta$  2.17 (s, 3H, *Me*-Lev), 2.59 (t, 2H,  $\text{CH}_2$ -Lev,  $J = 5.9$  Hz), 2.84 (t, 2H,  $\text{CH}_2$ -Lev,  $J = 6.8$  Hz), 4.08 (dd, 1H,  $\text{H}_3$ ,  $J = 6.3, 5.3$  Hz), 4.16 (m, 2H,  $\text{H}_2 + \text{H}_4$ ), 4.33 (dd, 1H,  $\text{H}_5$ ,  $J = 12.3, 4.1$  Hz), 4.40 (dd, 1H,  $\text{H}_5$ ,  $J = 12.4, 2.9$  Hz), 5.84 (d, 1H,  $\text{H}_5$ ,  $J = 3.2$  Hz), 5.95 (d, 1H,  $\text{H}_1$ ,  $J = 7.5$  Hz), 7.81 (d, 1H,  $\text{H}_6$ ,  $J = 7.5$  Hz) ppm.  $^{13}\text{C-NMR}$  (75.5 MHz,  $\text{MeOH-}d_4$ ):  $\delta$  28.8 ( $\text{CH}_2$ -Lev), 29.6 ( $\text{CH}_3$ -Lev), 38.6 ( $\text{CH}_2$ -Lev), 64.5 ( $\text{C}_5'$ ), 71.0 ( $\text{C}_3'$ ), 75.9 ( $\text{C}_2'$ ), 82.7 ( $\text{C}_4'$ ), 92.6 ( $\text{C}_1'$ ), 96.2 ( $\text{C}_5$ ), 142.5 ( $\text{C}_6$ ), 158.2 ( $\text{C}_2$ ), 167.6 ( $\text{C}_4$ ), 174.2 (CO-Lev), 209.5 (CO-Lev) ppm.

*N*<sup>4</sup>-Benzoyl-5'-O-levulinyl- $\beta$ -D-cytidine (**2d**).  $^1\text{H-NMR}$  (300.13 MHz,  $\text{DMSO-}d_6$ ):  $\delta$  2.12 (s, 3H, *Me*-Lev), 2.54 (t, 2H,  $\text{CH}_2$ -Lev,  $J = 6.3$  Hz), 2.75 (t, 2H,  $\text{CH}_2$ -Lev,  $J = 6.3$  Hz), 3.97 (m, 1H,  $\text{H}_4$ ), 4.09 (m, 2H,  $\text{H}_2 + \text{H}_3$ ), 4.25 (dd, 1H,  $\text{H}_5$ ,  $J = 12.2, 5.1$  Hz), 4.35 (dd, 1H,  $\text{H}_5$ ,  $J = 12.1, 2.3$  Hz), 5.82 (d, 1H,  $\text{H}_1$ ,  $J = 2.7$  Hz), 7.38 (d, 1H,  $\text{H}_5$ ,  $J = 7.5$  Hz), 7.51 (m, 2H,  $\text{H}_{\text{arom}}$ ), 7.63 (m, 1H,  $\text{H}_{\text{arom}}$ ), 8.01 (m, 2H,  $\text{H}_{\text{arom}}$ ), 8.16 (d, 1H,  $\text{H}_6$ ,  $J = 7.5$  Hz) ppm.  $^{13}\text{C-NMR}$  (75.5 MHz,  $\text{DMSO-}d_6$ ):  $\delta$  28.0 ( $\text{CH}_2$ -Lev), 30.0 ( $\text{CH}_3$ -Lev), 37.9 ( $\text{CH}_2$ -Lev), 63.9 ( $\text{C}_5'$ ), 69.7 ( $\text{C}_4'$ ), 74.3 ( $\text{C}_2'$ ), 81.3 ( $\text{C}_3'$ ), 91.4 ( $\text{C}_1'$ ), 96.9 ( $\text{C}_5$ ), 128.9 ( $4\text{CH}_{\text{arom}}$ ), 133.2, 133.6 ( $\text{CH}_{\text{arom}} + \text{C}_{\text{arom}}$ ), 145.5 ( $\text{C}_6$ ), 154.9 ( $\text{C}_2$ ), 163.5 ( $\text{C}_4$ ), 168.0 ( $\text{C}=\text{O}$ ), 172.2 (CO-Lev), 207.4 (CO-Lev) ppm.

5'-O-Levulinyl- $\beta$ -D-adenosine (**2e**).  $^1\text{H-NMR}$  (300.13 MHz,  $\text{MeOH-}d_4$ ):  $\delta$  2.14 (s, 3H, *Me*-Lev), 2.56 (t, 2H,  $\text{CH}_2$ -Lev,  $J = 6.4$  Hz), 2.78 (m, 2H,  $\text{CH}_2$ -Lev,  $J = 6.4$  Hz), 4.25 (q, 1H,  $\text{H}_4$ ,  $J = 4.7$  Hz), 4.37 (m, 3H,  $\text{H}_3 + \text{H}_5$ ), 4.74 (t, 2H,  $\text{H}_2$ ,  $J = 4.9$  Hz), 6.03 (d, 1H,  $\text{H}_1$ ,  $J = 4.5$  Hz), 8.21 (s, 1H,  $\text{H}_2$ ), 8.31 (s, 1H,  $\text{H}_8$ ) ppm.  $^{13}\text{C-NMR}$  (75.5 MHz,  $\text{MeOH-}d_4$ ):  $\delta$  28.8 ( $\text{CH}_2$ -Lev), 29.6 ( $\text{CH}_3$ -Lev), 38.6 ( $\text{CH}_2$ -Lev), 64.8 ( $\text{C}_5'$ ), 71.8 ( $\text{C}_3'$ ), 75.2 ( $\text{C}_2'$ ), 83.5 ( $\text{C}_4'$ ), 90.2 ( $\text{C}_1'$ ), 120.5 ( $\text{C}_5$ , cross peak with  $\text{H}_8$  in HMBC), 141.2 ( $\text{C}_8$ ), 150.6 ( $\text{C}_4$ ), 153.9 ( $\text{C}_2$ ), 157.3 ( $\text{C}_6$ ), 174.2 (CO-Lev), 209.5 (CO-Lev) ppm.

5'-O-Levulinyl- $\beta$ -D-inosine (**2f**).  $^1\text{H-NMR}$  (300.13 MHz,  $\text{MeOH-}d_4$ ):  $\delta$  2.15 (s, 3H, *Me*-Lev), 2.57 (t, 2H,  $\text{CH}_2$ -Lev,  $J = 6.4$  Hz), 2.80 (t, 2H,  $\text{CH}_2$ -Lev,  $J = 6.4$  Hz), 4.25 (q, 1H,  $\text{H}_4$ ,  $J = 4.3$  Hz), 4.37 (m, 3H,  $\text{H}_3 + \text{H}_5$ ), 4.70 (t, 2H,  $\text{H}_2$ ,  $J = 4.8$  Hz), 6.03 (d, 1H,  $\text{H}_1$ ,  $J = 4.6$  Hz), 8.07 (s, 1H,  $\text{H}_2$ ), 8.27 (s, 1H,  $\text{H}_8$ ) ppm.  $^{13}\text{C-NMR}$  (75.5 MHz,  $\text{MeOH-}d_4$ ):  $\delta$  28.8 ( $\text{CH}_2$ -Lev), 29.6 ( $\text{CH}_3$ -Lev), 38.6 ( $\text{CH}_2$ -Lev), 64.8 ( $\text{C}_5'$ ), 71.7 ( $\text{C}_3'$ ), 75.5 ( $\text{C}_2'$ ), 83.7 ( $\text{C}_4'$ ), 90.4 ( $\text{C}_1'$ ), 125.9 ( $\text{C}_5$ ), 140.7 ( $\text{C}_8$ ), 146.8 ( $\text{C}_2$ ), 149.9 ( $\text{C}_4$ , cross peak with  $\text{H}_1$  in HMBC), 158.9 ( $\text{C}_6$ ), 174.2 (CO-Lev), 209.5 (CO-Lev) ppm.

---

5'-O-(*tert*-Butyldimethylsilyl)- $\beta$ -D-uridine (**5a**).  $^1\text{H-NMR}$  (300.13 MHz,  $\text{CDCl}_3$ ):  $\delta$  0.10 (s, 6H, Si-*Me*), 0.91 (s, 9H, Si-*t*-Bu), 3.83 (dd, 1H,  $\text{H}_5$ ,  $J = 11.7, 1.5$  Hz), 4.01 (dd, 1H,  $\text{H}_5$ ,  $J = 11.8, 1.8$  Hz), 4.12 (m, 1H,  $\text{H}_4$ ), 4.23 (m, 2H,  $\text{H}_2 + \text{H}_3$ ), 5.64 (d, 1H,  $\text{H}_5$ ,  $J = 8.1$  Hz), 5.90 (d, 1H,  $\text{H}_1$ ,  $J = 2.2$  Hz), 8.05 (d, 1H,  $\text{H}_6$ ,  $J = 8.1$  Hz) ppm.  $^{13}\text{C-NMR}$  (75.5 MHz,  $\text{CDCl}_3$ ):  $\delta$  -5.4 (Si- $\text{CH}_3$ ), 18.6 (Si- $\text{CMe}_3$ ), 26.1 ( $\text{tBu-CH}_3$ ), 62.0 ( $\text{C}_5'$ ), 69.5 ( $\text{C}_2'$ ), 75.8 ( $\text{C}_3'$ ), 85.1 ( $\text{C}_4'$ ), 90.3 ( $\text{C}_1'$ ), 102.3 ( $\text{C}_5$ ), 140.6 ( $\text{C}_6$ ), 151.5 ( $\text{C}_2$ ), 164.1 ( $\text{C}_4$ ) ppm.

5'-O-(*tert*-Butyldimethylsilyl)- $\beta$ -D-5-methyluridine (**5b**).  $^1\text{H-NMR}$  (300.13 MHz,  $\text{MeOH-}d_4$ ):  $\delta$  0.15 (s, 3H, Si-*Me*), 0.16 (s, 3H, Si-*Me*), 0.97 (s, 9H, Si-*t*-Bu), 1.88 (d, 3H, *Me*,  $J = 1.1$  Hz), 3.85 (dd, 1H,  $\text{H}_5$ ,  $J = 11.6, 2.7$  Hz), 3.94 (dd, 1H,  $\text{H}_5$ ,  $J = 11.6, 2.3$  Hz), 4.02 (q, 1H,  $\text{H}_4$ ,  $J = 2.6$  Hz), 4.13 (m, 2H,  $\text{H}_2 + \text{H}_3$ ), 5.95 (d, 1H,  $\text{H}_1$ ,  $J = 5.0$  Hz), 7.58 (d, 1H,  $\text{H}_6$ ,  $J = 1.1$  Hz) ppm.  $^{13}\text{C-NMR}$  (75.5 MHz,  $\text{MeOH-}d_4$ ):  $\delta$  -5.2 (Si- $\text{CH}_3$ ), 12.6 ( $\text{CH}_3$ ), 19.4 (Si- $\text{CMe}_3$ ), 26.5 ( $\text{tBu-CH}_3$ ), 64.3 ( $\text{C}_5'$ ), 71.7 ( $\text{C}_2'$ ), 75.7 ( $\text{C}_3'$ ), 86.4 ( $\text{C}_4'$ ), 89.6 ( $\text{C}_1'$ ), 111.6 ( $\text{C}_5$ ), 137.4 ( $\text{C}_6$ ), 152.6 ( $\text{C}_2$ ), 166.2 ( $\text{C}_4$ ) ppm.

5'-O-(*tert*-Butyldimethylsilyl)- $\beta$ -d-cytidine (**5c**).  $^1\text{H-NMR}$  (300.13 MHz, MeOH- $d_4$ ):  $\delta$  0.15 (s, 6H, Si-Me), 0.96 (s, 9H, Si-*t*Bu), 3.87 (dd, 1H, H<sub>5'</sub>,  $J$  = 12.0, 2.1 Hz), 4.02-4.16 (several m, 4H, H<sub>2'</sub> + H<sub>3'</sub> + H<sub>4'</sub> + H<sub>5'</sub>), 5.85 (d, 1H, H<sub>5</sub>,  $J$  = 7.6 Hz), 5.88 (d, 1H, H<sub>1'</sub>,  $J$  = 2.7 Hz), 8.11 (d, 1H, H<sub>6</sub>,  $J$  = 7.5 Hz) ppm.  $^{13}\text{C-NMR}$  (75.5 MHz, MeOH- $d_4$ ):  $\delta$  -5.39 (Si-CH<sub>3</sub>), -5.36 (Si-CH<sub>3</sub>), 19.3 (SiCMe<sub>3</sub>), 26.5 (<sup>t</sup>Bu-CH<sub>3</sub>), 63.0 (C<sub>5'</sub>), 70.1 (C<sub>2'</sub>), 76.8 (C<sub>3'</sub>), 85.3 (C<sub>4'</sub>), 91.8 (C<sub>1'</sub>), 95.71 (C<sub>5</sub>), 142.4 (C<sub>6</sub>), 158.4 (C<sub>2</sub>), 167.6 (C<sub>4</sub>) ppm.

N<sup>4</sup>-Benzoyl-5'-O-(*tert*-butyldimethylsilyl)- $\beta$ -d-cytidine (**5d**).  $^1\text{H-NMR}$  (300.13 MHz, MeOH- $d_4$ ):  $\delta$  0.17 (s, 3H, Si-Me), 0.19 (s, 3H, Si-Me), 0.99 (s, 9H, Si-*t*Bu), 3.91 (dd, 1H, H<sub>5'</sub>,  $J$  = 12.2, 2.1 Hz), 4.15 (several m, 4H, H<sub>2'</sub> + H<sub>3'</sub> + H<sub>4'</sub> + H<sub>5'</sub>), 5.90 (d, 1H, H<sub>1'</sub>,  $J$  = 1.5 Hz), 7.58 (m, 4H, H<sub>5</sub> + H<sub>arom</sub>), 7.98 (m, 2H, H<sub>arom</sub>), 8.64 (d, 1H, H<sub>6</sub>,  $J$  = 7.5 Hz) ppm.  $^{13}\text{C-NMR}$  (75.5 MHz, MeOH- $d_4$ ):  $\delta$  -5.3 (Si-CH<sub>3</sub>), 19.4 (SiCMe<sub>3</sub>), 26.5 (<sup>t</sup>Bu-CH<sub>3</sub>), 62.6 (C<sub>5'</sub>), 69.5 (C<sub>2'</sub>), 76.8 (C<sub>3'</sub>), 85.5 (C<sub>4'</sub>), 92.9 (C<sub>1'</sub>), 98.1 (C<sub>5</sub>), 129.2 (CH<sub>arom</sub>), 129.8 (CH<sub>arom</sub>), 134.1 (CH<sub>arom</sub>), 134.7 (C<sub>arom</sub>), 146.3 (C<sub>6</sub>), 157.9 (C<sub>2</sub>), 164.8 (C<sub>4</sub>), 169.2 (C=O) ppm.

5'-O-(*tert*-Butyldimethylsilyl)- $\beta$ -d-adenosine (**5e**).  $^1\text{H-NMR}$  (300.13 MHz, MeOH- $d_4$ ):  $\delta$  0.11 (s, 6H, Si-Me), 0.92 (s, 9H, Si-*t*Bu), 3.87 (dd, 1H, H<sub>5'</sub>,  $J$  = 11.6, 3.0 Hz), 4.01 (dd, 1H, H<sub>5'</sub>,  $J$  = 11.6, 3.0 Hz), 4.13 (m, 1H, H<sub>4'</sub>), 4.36 (t, 1H, H<sub>3'</sub>,  $J$  = 5.0 Hz), 4.56 (t, 1H, H<sub>2'</sub>,  $J$  = 4.6 Hz), 6.05 (d, 1H, H<sub>1'</sub>,  $J$  = 4.2 Hz), 8.20 (s, 1H, H<sub>2</sub>), 8.38 (s, 1H, H<sub>8</sub>) ppm.  $^{13}\text{C-NMR}$  (75.5 MHz, MeOH- $d_4$ ):  $\delta$  -5.33 (Si-CH<sub>3</sub>), -5.31 (Si-CH<sub>3</sub>), 19.3 (SiCMe<sub>3</sub>), 26.5 (<sup>t</sup>Bu-CH<sub>3</sub>), 63.8 (C<sub>5'</sub>), 71.3 (C<sub>3'</sub>), 76.3 (C<sub>2'</sub>), 86.3 (C<sub>4'</sub>), 90.1 (C<sub>1'</sub>), 120.4 (C<sub>5</sub>), 140.7 (C<sub>8</sub>), 150.5 (C<sub>4</sub>), 153.9 (C<sub>2</sub>), 157.3 (C<sub>6</sub>) ppm.

5'-O-(*tert*-Butyldimethylsilyl)- $\beta$ -d-inosine (**5f**).  $^1\text{H-NMR}$  (300.13 MHz, MeOH- $d_4$ ):  $\delta$  0.10 (s, 6H, Si-Me), 0.91 (s, 9H, Si-*t*Bu), 3.86 (dd, 1H, H<sub>5'</sub>,  $J$  = 11.6, 3.1 Hz), 3.99 (dd, 1H, H<sub>5'</sub>,  $J$  = 11.6, 3.0 Hz), 4.14 (m, 1H, H<sub>4'</sub>), 4.36 (t, 1H, H<sub>3'</sub>,  $J$  = 4.8 Hz), 4.56 (t, 1H, H<sub>2'</sub>,  $J$  = 4.8 Hz), 6.07 (d, 1H, H<sub>1'</sub>,  $J$  = 4.5 Hz), 8.07 (s, 1H, H<sub>2</sub>), 8.31 (s, 1H, H<sub>8</sub>) ppm.  $^{13}\text{C-NMR}$  (75.5 MHz, MeOH- $d_4$ ):  $\delta$  -5.33 (Si-CH<sub>3</sub>), -5.29 (Si-CH<sub>3</sub>), 19.3 (SiCMe<sub>3</sub>), 26.5 (<sup>t</sup>Bu-CH<sub>3</sub>), 63.9 (C<sub>5'</sub>), 71.5 (C<sub>3'</sub>), 76.6 (C<sub>2'</sub>), 86.6 (C<sub>4'</sub>), 90.0 (C<sub>1'</sub>), 125.6 (C<sub>5</sub>), 140.1 (C<sub>8</sub>), 146.8 (C<sub>2</sub>), 149.9 (C<sub>4</sub>), 158.9 (C<sub>6</sub>) ppm.

5'-O-(*tert*-Butyldimethylsilyl)-2',3'-bis-O-[(ethylthio)thiocarbonyl]- $\beta$ -d-uridine (**6a**).  $^1\text{H-NMR}$  (300.13 MHz, CDCl<sub>3</sub>):  $\delta$  0.15 (s, 3H, Si-Me), 0.17 (s, 3H, Si-Me), 0.95 (s, 9H, Si-*t*Bu), 1.35 (t, 3H, SCH<sub>2</sub>-Me,  $J$  = 7.4 Hz), 1.37 (t, 3H, SCH<sub>2</sub>-Me,  $J$  = 7.4 Hz), 3.13 (m, 4H, S-CH<sub>2</sub>), 3.92 (dd, 1H, H<sub>5'</sub>,  $J$  = 11.4, 1.7 Hz), 4.03 (dd, 1H, H<sub>5'</sub>,  $J$  = 11.4, 1.5 Hz), 4.44 (m, 1H, H<sub>4'</sub>), 5.75 (d, 1H, H<sub>5</sub>,  $J$  = 8.2 Hz), 6.07 (dd, 1H, H<sub>2'</sub>,  $J$  = 7.4, 5.7 Hz), 6.22 (dd, 1H, H<sub>3'</sub>,  $J$  = 5.6, 1.1 Hz), 6.56 (d, 1H, H<sub>1'</sub>,  $J$  = 7.4 Hz), 7.87 (d, 1H, H<sub>6</sub>,  $J$  = 8.2 Hz), 9.09 (br s, 1H, NH) ppm.  $^{13}\text{C-NMR}$  (75.5 MHz, CDCl<sub>3</sub>):  $\delta$  -5.5 (Si-CH<sub>3</sub>), -5.2 (Si-CH<sub>3</sub>), 13.3 (SCH<sub>2</sub>-CH<sub>3</sub>), 13.5 (SCH<sub>2</sub>-CH<sub>3</sub>), 18.5 (SiCMe<sub>3</sub>), 26.1 (<sup>t</sup>Bu-CH<sub>3</sub>), 30.8 (S-CH<sub>2</sub>), 63.5 (C<sub>5'</sub>), 78.9 (C<sub>3'</sub>), 79.6 (C<sub>2'</sub>), 84.6 (C<sub>4'</sub>), 85.4 (C<sub>1'</sub>), 103.6 (C<sub>5</sub>), 139.7 (C<sub>6</sub>), 150.4 (C<sub>2</sub>), 163.0 (C<sub>4</sub>), 213.7 (C=S), 214.1 (C=S) ppm.

5'-O-(*tert*-Butyldimethylsilyl)-2',3'-bis-O-[(ethylthio)thiocarbonyl]- $\beta$ -d-5-methyluridine (**6b**).  $^1\text{H-NMR}$  (300.13 MHz, CDCl<sub>3</sub>):  $\delta$  0.19 (s, 6H, Si-Me), 0.98 (s, 9H, Si-*t*Bu), 1.35 (t, 3H, SCH<sub>2</sub>-Me,  $J$  = 7.4 Hz), 1.37 (t, 3H, SCH<sub>2</sub>-Me,  $J$  = 7.4 Hz), 1.94 (d, 3H, Me,  $J$  = 1.1 Hz), 3.14 (m, 4H, S-CH<sub>2</sub>), 3.93 (dd, 1H, H<sub>5'</sub>,  $J$  = 11.4, 1.7 Hz), 4.07 (dd, 1H, H<sub>5'</sub>,  $J$  = 11.4, 1.7 Hz), 4.42 (m, 1H, H<sub>4'</sub>), 6.03 (dd, 1H, H<sub>2'</sub>,  $J$  = 7.8, 5.6 Hz), 6.22 (dd, 1H, H<sub>3'</sub>,  $J$  = 5.6, 1.0 Hz), 6.56 (d, 1H, H<sub>1'</sub>,  $J$  = 7.9 Hz), 7.54 (d, 1H, H<sub>6</sub>,  $J$  = 1.2 Hz), 8.16 (br s, 1H, NH) ppm.  $^{13}\text{C-NMR}$  (75.5 MHz, CDCl<sub>3</sub>):  $\delta$  -5.3 (Si-CH<sub>3</sub>), -4.9 (Si-CH<sub>3</sub>), 12.6 (CH<sub>3</sub>), 13.4 (SCH<sub>2</sub>-CH<sub>3</sub>), 13.5 (SCH<sub>2</sub>-CH<sub>3</sub>), 18.6 (SiCMe<sub>3</sub>), 26.2 (<sup>t</sup>Bu-CH<sub>3</sub>), 30.79 (S-CH<sub>2</sub>), 30.83 (S-CH<sub>2</sub>), 63.5 (C<sub>5'</sub>), 78.7 (C<sub>3'</sub>), 79.1 (C<sub>2'</sub>), 84.4 (C<sub>4'</sub>), 84.7 (C<sub>1'</sub>), 112.2 (C<sub>5</sub>), 134.9 (C<sub>6</sub>), 150.5 (C<sub>2</sub>), 163.5 (C<sub>4</sub>), 213.7 (C=S), 214.2 (C=S) ppm.

5'-O-(*tert*-Butyldimethylsilyl)-2',3'-bis-O-[(ethylthio)thiocarbonyl]- $\beta$ -d-cytidine (**6c**).  $^1\text{H-NMR}$  (300.13 MHz, CDCl<sub>3</sub>):  $\delta$  0.14 (s, 3H, Si-Me), 0.15 (s, 3H, Si-Me), 0.94 (s, 9H, Si-*t*Bu), 1.33 (t, 3H, SCH<sub>2</sub>-Me,  $J$  = 6.1 Hz), 1.35 (t, 3H, SCH<sub>2</sub>-Me,  $J$  = 6.1 Hz), 3.13 (m, 4H, S-CH<sub>2</sub>), 3.92 (dd, 1H, H<sub>5'</sub>,  $J$  = 11.3, 1.8 Hz), 4.01 (dd, 1H, H<sub>5'</sub>,  $J$  = 11.3, 1.7 Hz), 4.41 (m, 1H, H<sub>4'</sub>), 5.76 (d, 1H, H<sub>5</sub>,  $J$  = 7.4 Hz), 6.04 (dd, 1H, H<sub>2'</sub>,  $J$  = 7.0, 5.6 Hz), 6.24 (dd, 1H, H<sub>3'</sub>,  $J$  = 5.5, 2.0 Hz), 6.67 (d, 1H, H<sub>1'</sub>,  $J$  = 7.0 Hz), 7.84 (d, 1H, H<sub>6</sub>,  $J$  = 7.4 Hz) ppm.  $^{13}\text{C-NMR}$  (75.5 MHz, CDCl<sub>3</sub>):  $\delta$  -5.4 (Si-CH<sub>3</sub>), -5.2 (Si-CH<sub>3</sub>), 13.4 (SCH<sub>2</sub>-CH<sub>3</sub>), 13.6 (SCH<sub>2</sub>-CH<sub>3</sub>), 18.5 (SiCMe<sub>3</sub>), 26.2 (<sup>t</sup>Bu-CH<sub>3</sub>), 30.66 (S-CH<sub>2</sub>), 30.71 (S-CH<sub>2</sub>), 63.4 (C<sub>5'</sub>), 78.8 (C<sub>3'</sub>), 80.4 (C<sub>2'</sub>), 83.9 (C<sub>4'</sub>), 86.1 (C<sub>1'</sub>), 95.6 (C<sub>5</sub>), 141.3 (C<sub>6</sub>), 155.8 (C<sub>2</sub>), 165.7 (C<sub>4</sub>), 213.7 (C=S), 214.1 (C=S) ppm.

N<sup>4</sup>-Benzoyl-5'-O-(*tert*-butyldimethylsilyl)-2',3'-bis-O-[(ethylthio)thiocarbonyl]- $\beta$ -d-cytidine (**6d**).  $^1\text{H-NMR}$  (300.13 MHz, CDCl<sub>3</sub>):  $\delta$  0.18 (s, 6H, Si-Me), 0.97 (s, 9H, Si-*t*Bu), 1.34 (t, 3H, SCH<sub>2</sub>-Me,  $J$  = 6.1 Hz), 1.37 (t, 3H,

SCH<sub>2</sub>-Me, *J* = 6.1 Hz), 3.14 (m, 4H, S-CH<sub>2</sub>), 3.98 (dd, 1H, H<sub>5'</sub>, *J* = 11.5, 1.8 Hz), 4.05 (dd, 1H, H<sub>5'</sub>, *J* = 11.5, 1.6 Hz), 4.49 (m, 1H, H<sub>4'</sub>), 6.15 (dd, 1H, H<sub>2'</sub>, *J* = 6.8, 5.6 Hz), 6.27 (dd, 1H, H<sub>3'</sub>, *J* = 5.5, 1.8 Hz), 6.74 (d, 1H, H<sub>1'</sub>, *J* = 6.9 Hz), 7.50 (m, 3H, H<sub>5</sub> + H<sub>arom</sub>), 7.61 (m, 1H, H<sub>arom</sub>), 7.91 (m, 2H, H<sub>arom</sub>), 8.30 (d, 1H, H<sub>6</sub>, *J* = 7.6 Hz), 8.69 (br s, 1H, NH) ppm. <sup>13</sup>C-NMR (75.5 MHz, CDCl<sub>3</sub>): δ -5.4 (Si-CH<sub>3</sub>), -5.2 (Si-CH<sub>3</sub>), 13.3 (SCH<sub>2</sub>-CH<sub>3</sub>), 13.5 (SCH<sub>2</sub>-CH<sub>3</sub>), 18.5 (SiCMe<sub>3</sub>), 26.1 (<sup>t</sup>Bu-CH<sub>3</sub>), 30.65 (S-CH<sub>2</sub>), 30.74 (S-CH<sub>2</sub>), 63.2 (C<sub>5'</sub>), 78.8 (C<sub>3'</sub>), 80.7 (C<sub>2'</sub>), 84.6 (C<sub>4'</sub>), 86.5 (C<sub>1'</sub>), 97.8 (C<sub>5</sub>), 127.8 (CH<sub>arom</sub>), 129.1 (CH<sub>arom</sub>), 133.2 (C<sub>arom</sub>), 133.3 (CH<sub>arom</sub>), 144.4 (C<sub>6</sub>), 154.6 (C<sub>2</sub>), 162.5 (C<sub>4</sub>), 167.1 (C=O), 213.6 (C=S), 214.0 (C=S) ppm.

5'-O-(*tert*-Butyldimethylsilyl)-2',3'-bis-O-[(ethylthio)thiocarbonyl]-β-d-adenosine (**6e**). <sup>1</sup>H-NMR (300.13 MHz, CDCl<sub>3</sub>): δ 0.16 (s, 6H, Si-Me), 0.95 (s, 9H, Si-<sup>t</sup>Bu), 1.29 (t, 3H, SCH<sub>2</sub>-Me, *J* = 7.4 Hz), 1.37 (t, 3H, SCH<sub>2</sub>-Me, *J* = 7.4 Hz), 3.07 (q, 2H, S-CH<sub>2</sub>, *J* = 7.4 Hz), 3.17 (q, 2H, S-CH<sub>2</sub>, *J* = 7.3 Hz), 3.95 (dd, 1H, H<sub>5'</sub>, *J* = 11.4, 2.1 Hz), 4.05 (dd, 1H, H<sub>5'</sub>, *J* = 11.3, 2.1 Hz), 4.52 (m, 1H, H<sub>4'</sub>), 6.14 (br s, 2H, NH<sub>2</sub>), 6.41 (dd, 1H, H<sub>3'</sub>, *J* = 5.4, 1.9 Hz), 6.48 (dd, 1H, H<sub>2'</sub>, *J* = 6.8, 5.5 Hz), 6.60 (d, 1H, H<sub>1'</sub>, *J* = 6.9 Hz), 8.22 (s, 1H, H<sub>8</sub>), 8.35 (s, 1H, H<sub>2</sub>) ppm. <sup>13</sup>C-NMR (75.5 MHz, CDCl<sub>3</sub>): δ -5.3 (Si-CH<sub>3</sub>), -5.1 (Si-CH<sub>3</sub>), 13.3 (SCH<sub>2</sub>-CH<sub>3</sub>), 18.6 (SiCMe<sub>3</sub>), 26.2 (<sup>t</sup>Bu-CH<sub>3</sub>), 30.8 (S-CH<sub>2</sub>), 63.4 (C<sub>5'</sub>), 78.8 (C<sub>3'</sub>), 80.7 (C<sub>2'</sub>), 84.7 (C<sub>1'</sub> + C<sub>4'</sub>), 119.6 (C<sub>5</sub>), 138.5 (C<sub>8</sub>), 150.3 (C<sub>4</sub>), 153.4 (C<sub>2</sub>), 155.7 (C<sub>6</sub>), 213.6 (C=S), 214.0 (C=S) ppm.

5'-O-(*tert*-Butyldimethylsilyl)-2',3'-bis-O-[(ethylthio)thiocarbonyl]-β-d-inosine (**6f**). <sup>1</sup>H-NMR (300.13 MHz, CDCl<sub>3</sub>): δ 0.17 (s, 6H, Si-Me), 0.96 (s, 9H, Si-<sup>t</sup>Bu), 1.31 (t, 3H, SCH<sub>2</sub>-Me, *J* = 7.4 Hz), 1.39 (t, 3H, SCH<sub>2</sub>-Me, *J* = 7.4 Hz), 3.09 (q, 2H, S-CH<sub>2</sub>, *J* = 7.4 Hz), 3.18 (q, 2H, S-CH<sub>2</sub>, *J* = 7.4 Hz), 3.97 (dd, 1H, H<sub>5'</sub>, *J* = 11.4, 2.0 Hz), 4.06 (dd, 1H, H<sub>5'</sub>, *J* = 11.4, 2.0 Hz), 4.55 (m, 1H, H<sub>4'</sub>), 6.40 (dd, 1H, H<sub>3'</sub>, *J* = 5.3, 2.0 Hz), 6.46 (m, 1H, H<sub>2'</sub>), 6.53 (d, 1H, H<sub>1'</sub>, *J* = 6.7 Hz), 8.20 (s, 1H, H<sub>2</sub>), 8.24 (s, 1H, H<sub>8</sub>), 13.10 (br s, 1H, NH) ppm. <sup>13</sup>C-NMR (75.5 MHz, CDCl<sub>3</sub>): δ -5.3 (Si-CH<sub>3</sub>), -5.1 (Si-CH<sub>3</sub>), 13.3 (SCH<sub>2</sub>-CH<sub>3</sub>), 13.4 (SCH<sub>2</sub>-CH<sub>3</sub>), 18.6 (SiCMe<sub>3</sub>), 26.2 (<sup>t</sup>Bu-CH<sub>3</sub>), 30.86 (S-CH<sub>2</sub>), 30.93 (S-CH<sub>2</sub>), 63.3 (C<sub>5'</sub>), 78.7 (C<sub>3'</sub>), 80.9 (C<sub>2'</sub>), 84.9 (C<sub>4'</sub>), 85.2 (C<sub>1'</sub>), 124.9 (C<sub>5</sub>), 138.3 (C<sub>8</sub>), 145.6 (C<sub>2</sub>), 149.3 (C<sub>4</sub>), 159.3 (C<sub>6</sub>), 213.4 (C=S), 214.0 (C=S) ppm.

5'-O-(*tert*-Butyldimethylsilyl)-2',3'-didehydro-2',3'-dideoxy-β-d-uridine (**7a**). <sup>1</sup>H-NMR (300.13 MHz, DMSO-*d*<sub>6</sub>): δ 0.03 (s, 6H, Si-Me), 0.85 (s, 9H, Si-<sup>t</sup>Bu), 3.75 (dd, 1H, H<sub>5'</sub>, *J* = 11.7, 3.7 Hz), 3.81 (dd, 1H, H<sub>5'</sub>, *J* = 11.7, 3.0 Hz), 4.82 (m, 1H, H<sub>4'</sub>), 5.52 (d, 1H, H<sub>5</sub>, *J* = 8.0 Hz), 5.95 (dt, 1H, H<sub>2'</sub>, *J* = 6.0, 1.8 Hz), 6.39 (dt, 1H, H<sub>3'</sub>, *J* = 6.0, 1.6 Hz), 6.80 (m, 1H, H<sub>1'</sub>), 7.63 (d, 1H, H<sub>6</sub>, *J* = 8.0 Hz), 11.35 (br s, 1H, NH) ppm. <sup>13</sup>C-NMR (75.5 MHz, DMSO-*d*<sub>6</sub>): δ -5.43 (Si-CH<sub>3</sub>), -5.38 (Si-CH<sub>3</sub>), 18.2 (SiCMe<sub>3</sub>), 25.8 (<sup>t</sup>Bu-CH<sub>3</sub>), 64.3 (C<sub>5'</sub>), 86.9 (C<sub>4'</sub>), 89.1 (C<sub>1'</sub>), 101.6 (C<sub>5</sub>), 126.2 (C<sub>2'</sub>), 134.5 (C<sub>3'</sub>), 140.8 (C<sub>6</sub>), 150.7 (C<sub>2</sub>), 163.1 (C<sub>4</sub>) ppm.

5'-O-(*tert*-Butyldimethylsilyl)-2',3'-didehydro-3'-deoxy-β-d-5-thymidine (**7b**). <sup>1</sup>H-NMR (300.13 MHz, DMSO-*d*<sub>6</sub>): δ 0.03 (s, 6H, Si-Me), 0.85 (s, 9H, Si-<sup>t</sup>Bu), 1.75 (d, 3H, Me, *J* = 0.9 Hz), 3.72 (dd, 1H, H<sub>5'</sub>, *J* = 11.5, 4.6 Hz), 3.80 (dd, 1H, H<sub>5'</sub>, *J* = 11.6, 3.2 Hz), 4.78 (m, 1H, H<sub>4'</sub>), 5.96 (dt, 1H, H<sub>2'</sub>, *J* = 6.0, 2.0 Hz), 6.38 (dt, 1H, H<sub>3'</sub>, *J* = 6.0, 1.6 Hz), 6.78 (m, 1H, H<sub>1'</sub>), 7.28 (d, 1H, H<sub>6</sub>, *J* = 1.2 Hz), 11.36 (br s, 1H, NH) ppm. <sup>13</sup>C-NMR (75.5 MHz, DMSO-*d*<sub>6</sub>): δ -5.3 (Si-CH<sub>3</sub>), -5.2 (Si-CH<sub>3</sub>), 12.2 (CH<sub>3</sub>), 18.3 (SiCMe<sub>3</sub>), 25.9 (<sup>t</sup>Bu-CH<sub>3</sub>), 64.7 (C<sub>5'</sub>), 86.7 (C<sub>4'</sub>), 89.2 (C<sub>1'</sub>), 109.4 (C<sub>5</sub>), 126.2 (C<sub>2'</sub>), 134.4 (C<sub>3'</sub>), 135.9 (C<sub>6</sub>), 150.8 (C<sub>2</sub>), 163.8 (C<sub>4</sub>) ppm.

5'-O-(*tert*-Butyldimethylsilyl)-2',3'-didehydro-2',3'-dideoxy-β-d-cytidine (**7c**). <sup>1</sup>H-NMR (300.13 MHz, CDCl<sub>3</sub>): δ 0.066 (s, 3H, Si-Me), 0.070 (s, 3H, Si-Me), 0.90 (s, 9H, Si-<sup>t</sup>Bu), 3.83 (dd, 1H, H<sub>5'</sub>, *J* = 11.6, 2.8 Hz), 3.92 (dd, 1H, H<sub>5'</sub>, *J* = 11.5, 3.0 Hz), 4.90 (m, 1H, H<sub>4'</sub>), 5.62 (d, 1H, H<sub>5</sub>, *J* = 7.4 Hz), 5.91 (m, 1H, H<sub>2'</sub>), 6.14 (dt, 1H, H<sub>3'</sub>, *J* = 6.0, 1.6 Hz), 7.07 (m, 1H, H<sub>1'</sub>), 7.94 (d, 1H, H<sub>6</sub>, *J* = 7.4 Hz) ppm. <sup>13</sup>C-NMR (75.5 MHz, CDCl<sub>3</sub>): δ -5.3 (Si-CH<sub>3</sub>), -5.2 (Si-CH<sub>3</sub>), 18.6 (SiCMe<sub>3</sub>), 26.1 (<sup>t</sup>Bu-CH<sub>3</sub>), 64.5 (C<sub>5'</sub>), 87.3 (C<sub>4'</sub>), 91.0 (C<sub>1'</sub>), 94.0 (C<sub>5</sub>), 128.2 (C<sub>2'</sub>), 132.7 (C<sub>3'</sub>), 142.8 (C<sub>6</sub>), 156.3 (C<sub>2</sub>), 165.6 (C<sub>4</sub>) ppm.

N<sup>4</sup>-Benzoyl-5'-O-(*tert*-butyldimethylsilyl)-2',3'-didehydro-2',3'-dideoxy-β-d-cytidine (**7d**). <sup>1</sup>H-NMR (300.13 MHz, CDCl<sub>3</sub>): δ 0.08 (s, 3H, Si-Me), 0.10 (s, 3H, Si-Me), 0.90 (s, 9H, Si-<sup>t</sup>Bu), 3.86 (dd, 1H, H<sub>5'</sub>, *J* = 11.7, 2.6 Hz), 3.99 (dd, 1H, H<sub>5'</sub>, *J* = 11.7, 2.7 Hz), 4.99 (m, 1H, H<sub>4'</sub>), 6.02 (d, 1H, H<sub>2'</sub>, *J* = 5.7 Hz), 6.18 (dt, 1H, H<sub>3'</sub>, *J* = 6.0, 1.4 Hz), 7.03 (m, 1H, H<sub>1'</sub>), 7.49 (m, 3H, H<sub>5</sub> + H<sub>arom</sub>), 7.60 (m, 1H, H<sub>arom</sub>), 7.93 (d, 2H, H<sub>arom</sub>, *J* = 7.3 Hz), 8.40 (d, 1H, H<sub>6</sub>, *J* = 7.5 Hz), 8.71 (br s, 1H, NH) ppm. <sup>13</sup>C-NMR (75.5 MHz, CDCl<sub>3</sub>): δ -5.4 (Si-CH<sub>3</sub>), -5.2 (Si-CH<sub>3</sub>), 18.6

(SiMe<sub>3</sub>), 26.0 (tBu-CH<sub>3</sub>), 64.2 (C<sub>5'</sub>), 88.0 (C<sub>4'</sub>), 91.8 (C<sub>1'</sub>), 96.9 (C<sub>5</sub>), 127.67 (C<sub>2'</sub>), 127.71 (CH<sub>arom</sub>), 129.1 (CH<sub>arom</sub>), 133.0 (C<sub>3'</sub>), 133.2 (CH<sub>arom</sub>), 133.4 (C<sub>arom</sub>), 145.7 (C<sub>6</sub>), 155.1 (C<sub>2</sub>), 162.3 (C<sub>4</sub>), 167.3 (C=O) ppm.

5'-O-(*tert*-Butyldimethylsilyl)-2',3'-didehydro-2',3'-dideoxy-β-d-adenosine (**7e**). <sup>1</sup>H-NMR (300.13 MHz, CDCl<sub>3</sub>): δ 0.03 (s, 3H, Si-Me), 0.04 (s, 3H, Si-Me), 0.87 (s, 9H, Si-*t*Bu), 3.81 (d, 2H, H<sub>5'</sub>, *J* = 3.8 Hz), 4.97 (m, 1H, H<sub>4'</sub>), 5.95 (br s, 2H, NH<sub>2</sub>), 6.03 (dt, 1H, H<sub>2'</sub>, *J* = 6.0, 1.9 Hz), 6.38 (dt, 1H, H<sub>3'</sub>, *J* = 6.0, 1.6 Hz), 7.09 (m, 1H, H<sub>1'</sub>), 8.09 (s, 1H, H<sub>8</sub>), 8.34 (s, 1H, H<sub>2</sub>) ppm. <sup>13</sup>C-NMR (75.5 MHz, CDCl<sub>3</sub>): δ -5.3 (Si-CH<sub>3</sub>), -5.2 (Si-CH<sub>3</sub>), 18.7 (SiMe<sub>3</sub>), 26.1 (tBu-CH<sub>3</sub>), 64.9 (C<sub>5'</sub>), 87.9 (C<sub>4'</sub>), 88.4 (C<sub>1'</sub>), 119.2 (C<sub>5</sub>), 125.7 (C<sub>2'</sub>), 134.7 (C<sub>3'</sub>), 139.4 (C<sub>8</sub>), 149.7 (C<sub>4</sub>), 152.9 (C<sub>2</sub>), 155.7 (C<sub>6</sub>) ppm.

5'-O-(*tert*-Butyldimethylsilyl)-2',3'-didehydro-2',3'-dideoxy-β-d-inosine (**7f**). <sup>1</sup>H-NMR (300.13 MHz, CDCl<sub>3</sub>): δ 0.03 (s, 3H, Si-Me), 0.04 (s, 3H, Si-Me), 0.87 (s, 9H, Si-*t*Bu), 3.82 (m, 2H, H<sub>5'</sub>), 4.99 (m, 1H, H<sub>4'</sub>), 6.05 (dt, 1H, H<sub>2'</sub>, *J* = 5.9, 1.8 Hz), 6.42 (dt, 1H, H<sub>3'</sub>, *J* = 5.8, 1.7 Hz), 7.04 (m, 1H, H<sub>1'</sub>), 8.09 (s, 1H, H<sub>8</sub>), 8.23 (s, 1H, H<sub>2</sub>), 13.23 (br s, 1H, NH) ppm. <sup>13</sup>C-NMR (75.5 MHz, CDCl<sub>3</sub>): δ -5.3 (Si-CH<sub>3</sub>), -5.2 (Si-CH<sub>3</sub>), 18.7 (SiMe<sub>3</sub>), 26.1 (tBu-CH<sub>3</sub>), 64.9 (C<sub>5'</sub>), 88.1 (C<sub>4'</sub>), 88.6 (C<sub>1'</sub>), 124.7 (C<sub>5</sub>), 125.3 (C<sub>2'</sub>), 135.0 (C<sub>3'</sub>), 139.1 (C<sub>8</sub>), 145.3 (C<sub>2</sub>), 149.0 (C<sub>4</sub>), 159.5 (C<sub>6</sub>) ppm.

2',3'-Didehydro-2',3'-dideoxy-β-d-uridine (**8a**). <sup>1</sup>H-NMR (300.13 MHz, MeOH-*d*<sub>4</sub>): δ 3.73 (m, 2H, H<sub>5'</sub>), 4.87 (m, 1H, H<sub>4'</sub>), 5.65 (d, 1H, H<sub>5</sub>, *J* = 8.1 Hz), 5.92 (m, 1H, H<sub>2'</sub>), 6.41 (dt, 1H, H<sub>3'</sub>, *J* = 6.0, 1.7 Hz), 6.94 (dt, 1H, H<sub>1'</sub>, *J* = 3.1, 1.5 Hz), 7.89 (d, 1H, H<sub>6</sub>, *J* = 8.1 Hz) ppm. <sup>13</sup>C-NMR (75.5 MHz, MeOH-*d*<sub>4</sub>): δ 63.8 (C<sub>5'</sub>), 89.1 (C<sub>4'</sub>), 91.3 (C<sub>1'</sub>), 102.5 (C<sub>5</sub>), 127.0 (C<sub>2'</sub>), 136.1 (C<sub>3'</sub>), 143.1 (C<sub>6</sub>), 152.7 (C<sub>2</sub>), 166.3 (C<sub>4</sub>) ppm.

2',3'-Didehydro-3'-deoxy-β-d-5-thymidine (**8b**). <sup>1</sup>H-NMR (300.13 MHz, MeOH-*d*<sub>4</sub>): δ 1.84 (d, 3H, Me, *J* = 1.1 Hz), 3.76 (m, 2H, H<sub>5'</sub>), 4.86 (debajo de H<sub>2</sub>O, 1H, H<sub>4'</sub>), 5.90 (dt, 1H, H<sub>2'</sub>, *J* = 6.0, 2.0 Hz), 6.40 (dt, 1H, H<sub>3'</sub>, *J* = 6.0, 1.7 Hz), 6.95 (dt, 1H, H<sub>1'</sub>, *J* = 3.4, 1.7 Hz), 7.75 (d, 1H, H<sub>6</sub>, *J* = 1.2 Hz) ppm. <sup>13</sup>C-NMR (75.5 MHz, MeOH-*d*<sub>4</sub>): δ 12.4 (CH<sub>3</sub>), 63.8 (C<sub>5'</sub>), 89.0 (C<sub>4'</sub>), 91.0 (C<sub>1'</sub>), 111.2 (C<sub>5</sub>), 127.3 (C<sub>2'</sub>), 135.9 (C<sub>3'</sub>), 138.9 (C<sub>6</sub>), 152.9 (C<sub>2</sub>), 166.6 (C<sub>4</sub>) ppm.

N<sup>4</sup>-Benzoyl-2',3'-didehydro-2',3'-dideoxy-β-d-cytidine (**8d**). <sup>1</sup>H-NMR (300.13 MHz, MeOH-*d*<sub>4</sub>): δ 3.78 (m, 2H, H<sub>5'</sub>), 4.99 (m, 1H, H<sub>4'</sub>), 6.05 (m, 1H, H<sub>2'</sub>), 6.41 (dt, 1H, H<sub>3'</sub>, *J* = 6.0, 1.6 Hz), 7.00 (dt, 1H, H<sub>1'</sub>, *J* = 2.9, 1.4 Hz), 7.54 (m, 3H, H<sub>5</sub> + H<sub>arom</sub>), 7.64 (m, 1H, H<sub>arom</sub>), 7.97 (m, 2H, H<sub>arom</sub>), 8.46 (d, 1H, H<sub>6</sub>, *J* = 7.5 Hz) ppm. <sup>13</sup>C-NMR (75.5 MHz, MeOH-*d*<sub>4</sub>): δ 63.7 (C<sub>5'</sub>), 89.9 (C<sub>4'</sub>), 93.4 (C<sub>1'</sub>), 98.5 (C<sub>5</sub>), 127.6 (C<sub>2'</sub>), 129.2 (CH<sub>arom</sub>), 129.8 (CH<sub>arom</sub>), 134.1 (CH<sub>arom</sub>), 134.7 (C<sub>arom</sub>), 135.5 (C<sub>3'</sub>), 147.3 (C<sub>6</sub>), 158.3 (C<sub>2</sub>), 165.0 (C<sub>4</sub>), 169.1 (C=O) ppm.

2',3'-Didehydro-2',3'-dideoxy-β-d-adenosine (**8e**). <sup>1</sup>H-NMR (300.13 MHz, MeOH-*d*<sub>4</sub>): δ 3.75 (m, 2H, H<sub>5'</sub>), 5.01 (m, 1H, H<sub>4'</sub>), 6.13 (m, 1H, H<sub>2'</sub>), 6.48 (dt, 1H, H<sub>3'</sub>, *J* = 6.0, 1.7 Hz), 7.04 (dt, 1H, H<sub>1'</sub>, *J* = 3.2, 1.7 Hz), 8.20 (s, 1H, H<sub>2</sub>), 8.28 (s, 1H, H<sub>8</sub>) ppm. <sup>13</sup>C-NMR (75.5 MHz, MeOH-*d*<sub>4</sub>): δ 64.2 (C<sub>5'</sub>), 89.8 (C<sub>1'</sub>), 90.3 (C<sub>4'</sub>), 120.2 (C<sub>5</sub>), 126.8 (C<sub>2'</sub>), 135.7 (C<sub>3'</sub>), 141.3 (C<sub>8</sub>), 150.3 (C<sub>4</sub>), 153.8 (C<sub>2</sub>), 157.4 (C<sub>6</sub>) ppm.

2',3'-Didehydro-2',3'-dideoxy-β-d-inosine (**8f**). <sup>1</sup>H-NMR (300.13 MHz, DMSO-*d*<sub>6</sub>): δ 3.56 (m, 2H, H<sub>5'</sub>), 4.89 (m, 1H, H<sub>4'</sub>), 4.98 (t, OH<sub>5'</sub>, *J* = 5.4 Hz), 6.13 (m, 1H, H<sub>2'</sub>), 6.48 (dd, 1H, H<sub>3'</sub>, *J* = 6.0, 1.5 Hz), 6.90 (m, 1H, H<sub>1'</sub>), 8.08 (s, 1H, H<sub>2</sub>), 8.11 (s, 1H, H<sub>8</sub>), 12.39 (br s, 1H, NH) ppm. <sup>13</sup>C-NMR (75.5 MHz, DMSO-*d*<sub>6</sub>): δ 62.7 (C<sub>5'</sub>), 88.1 (C<sub>1'</sub>), 88.3 (C<sub>4'</sub>), 124.1 (C<sub>5</sub>), 125.3 (C<sub>2'</sub>), 134.8 (C<sub>3'</sub>), 138.6 (C<sub>8</sub>), 146.0 (C<sub>2</sub>), 148.1 (C<sub>4</sub>), 156.7 (C<sub>6</sub>) ppm.

2',3'-Dideoxy-β-d-uridine (**9a**). <sup>1</sup>H-NMR (300.13 MHz, MeOH-*d*<sub>4</sub>): δ 1.96 (m, 2H, H<sub>3'</sub>), 2.08 (m, 1H, H<sub>2'</sub>), 2.40 (m, 1H, H<sub>2'</sub>), 3.68 (dd, 1H, H<sub>5'</sub>, *J* = 12.2, 4.0 Hz), 3.86 (dd, 1H, H<sub>5'</sub>, *J* = 12.2, 3.1 Hz), 4.14 (m, 1H, H<sub>4'</sub>), 5.66 (d, 1H, H<sub>5</sub>, *J* = 8.1 Hz), 6.04 (dd, 1H, H<sub>1'</sub>, *J* = 6.8, 3.4 Hz), 8.08 (d, 1H, H<sub>6</sub>, *J* = 8.1 Hz) ppm. <sup>13</sup>C-NMR (75.5 MHz, MeOH-*d*<sub>4</sub>): δ 25.9 (C<sub>3'</sub>), 33.5 (C<sub>2'</sub>), 63.7 (C<sub>5'</sub>), 83.5 (C<sub>4'</sub>), 87.7 (C<sub>1'</sub>), 101.9 (C<sub>5</sub>), 142.6 (C<sub>6</sub>), 152.2 (C<sub>2</sub>), 166.4 (C<sub>4</sub>) ppm.

3'-Deoxy-β-d-5-thymidine (**9b**). <sup>1</sup>H-NMR (300.13 MHz, MeOH-*d*<sub>4</sub>): δ 1.88 (d, 3H, Me, *J* = 1.1 Hz), 1.98 (m, 2H, H<sub>3'</sub>), 2.07 (m, 1H, H<sub>2'</sub>), 2.38 (m, 1H, H<sub>2'</sub>), 3.68 (dd, 1H, H<sub>5'</sub>, *J* = 12.2, 3.8 Hz), 3.88 (dd, 1H, H<sub>5'</sub>, *J* = 12.2, 2.9

Hz), 4.13 (m, 1H, H<sub>4'</sub>), 6.05 (dd, 1H, H<sub>1'</sub>, *J* = 6.8, 3.5 Hz), 7.92 (d, 1H, H<sub>6</sub>, *J* = 1.1 Hz) ppm. <sup>13</sup>C-NMR (75.5 MHz, MeOH-*d*<sub>4</sub>): δ 12.4 (CH<sub>3</sub>), 25.9 (C<sub>3'</sub>), 33.3 (C<sub>2'</sub>), 63.7 (C<sub>5'</sub>), 83.2 (C<sub>4'</sub>), 87.3 (C<sub>1'</sub>), 110.8 (C<sub>5</sub>), 138.4 (C<sub>6</sub>), 152.4 (C<sub>2</sub>), 166.6 (C<sub>4</sub>) ppm.

2',3'-Dideoxy-β-d-cytidine (**9c**). <sup>1</sup>H-NMR (300.13 MHz, D<sub>2</sub>O): δ 1.78 (m, 1H, H<sub>3'</sub>), 2.05 (m, 2H, H<sub>2'</sub> + H<sub>3'</sub>), 2.45 (m, 1H, H<sub>2'</sub>), 3.72 (dd, 1H, H<sub>5'</sub>, *J* = 12.4, 5.4 Hz), 3.87 (dd, 1H, H<sub>5'</sub>, *J* = 12.4, 3.1 Hz), 4.23 (m, 1H, H<sub>4'</sub>), 6.00 (d, 1H, H<sub>5</sub>, *J* = 7.5 Hz), 6.05 (dd, 1H, H<sub>1'</sub>, *J* = 7.0, 2.7 Hz), 7.89 (d, 1H, H<sub>6</sub>, *J* = 7.5 Hz) ppm. <sup>13</sup>C-NMR (75.5 MHz, D<sub>2</sub>O): δ 24.7 (C<sub>3'</sub>), 31.9 (C<sub>2'</sub>), 62.6 (C<sub>5'</sub>), 82.2 (C<sub>4'</sub>), 87.0 (C<sub>1'</sub>), 95.5 (C<sub>5</sub>), 141.6 (C<sub>6</sub>), 157.3 (C<sub>2</sub>), 165.9 (C<sub>4</sub>) ppm.

2',3'-Dideoxy-β-d-adenosine (**9e**). <sup>1</sup>H-NMR (300.13 MHz, MeOH-*d*<sub>4</sub>): δ 2.15 (m, 2H, H<sub>3'</sub>), 2.51 (m, 2H, H<sub>2'</sub>), 3.67 (dd, 1H, H<sub>5'</sub>, *J* = 12.2, 3.9 Hz), 3.87 (dd, 1H, H<sub>5'</sub>, *J* = 12.2, 3.0 Hz), 4.27 (m, 1H, H<sub>4'</sub>), 6.28 (dd, 1H, H<sub>1'</sub>, *J* = 5.8, 4.8 Hz), 8.18 (s, 1H, H<sub>2</sub>), 8.41 (s, 1H, H<sub>8</sub>) ppm. <sup>13</sup>C-NMR (75.5 MHz, MeOH-*d*<sub>4</sub>): δ 26.5 (C<sub>3'</sub>), 33.7 (C<sub>2'</sub>), 64.5 (C<sub>5'</sub>), 83.6 (C<sub>4'</sub>), 87.4 (C<sub>1'</sub>), 120.5 (C<sub>5</sub>), 141.0 (C<sub>2</sub>), 149.8 (C<sub>4</sub>), 153.5 (C<sub>8</sub>), 157.3 (C<sub>6</sub>) ppm.

2',3'-Dideoxy-β-d-inosine (**9f**). <sup>1</sup>H-NMR (300.13 MHz, MeOH-*d*<sub>4</sub>): δ 2.12 (m, 2H, H<sub>3'</sub>), 2.52 (m, 2H, H<sub>2'</sub>), 3.67 (dd, 1H, H<sub>5'</sub>, *J* = 12.1, 4.2 Hz), 3.84 (dd, 1H, H<sub>5'</sub>, *J* = 12.1, 3.2 Hz), 4.26 (m, 1H, H<sub>4'</sub>), 6.31 (dd, 1H, H<sub>1'</sub>, *J* = 6.5, 3.5 Hz), 8.04 (s, 1H, H<sub>2</sub>), 8.39 (s, 1H, H<sub>8</sub>) ppm. <sup>13</sup>C-NMR (75.5 MHz, MeOH-*d*<sub>4</sub>): δ 26.4 (C<sub>3'</sub>), 33.9 (C<sub>2'</sub>), 64.3 (C<sub>5'</sub>), 83.9 (C<sub>4'</sub>), 87.3 (C<sub>1'</sub>), 125.7 (C<sub>5</sub>), 140.4 (C<sub>8</sub>), 146.6 (C<sub>2</sub>), 149.3 (C<sub>4</sub>), 159.0 (C<sub>6</sub>) ppm.

**5'-*O*-Levulinyl- $\beta$ -D-uridine (2a)**

$^1\text{H-NMR}$  (300.13 MHz,  $\text{CDCl}_3$ )

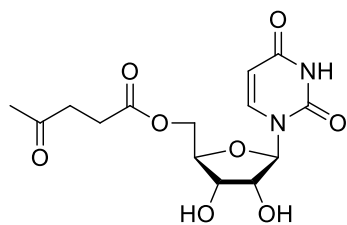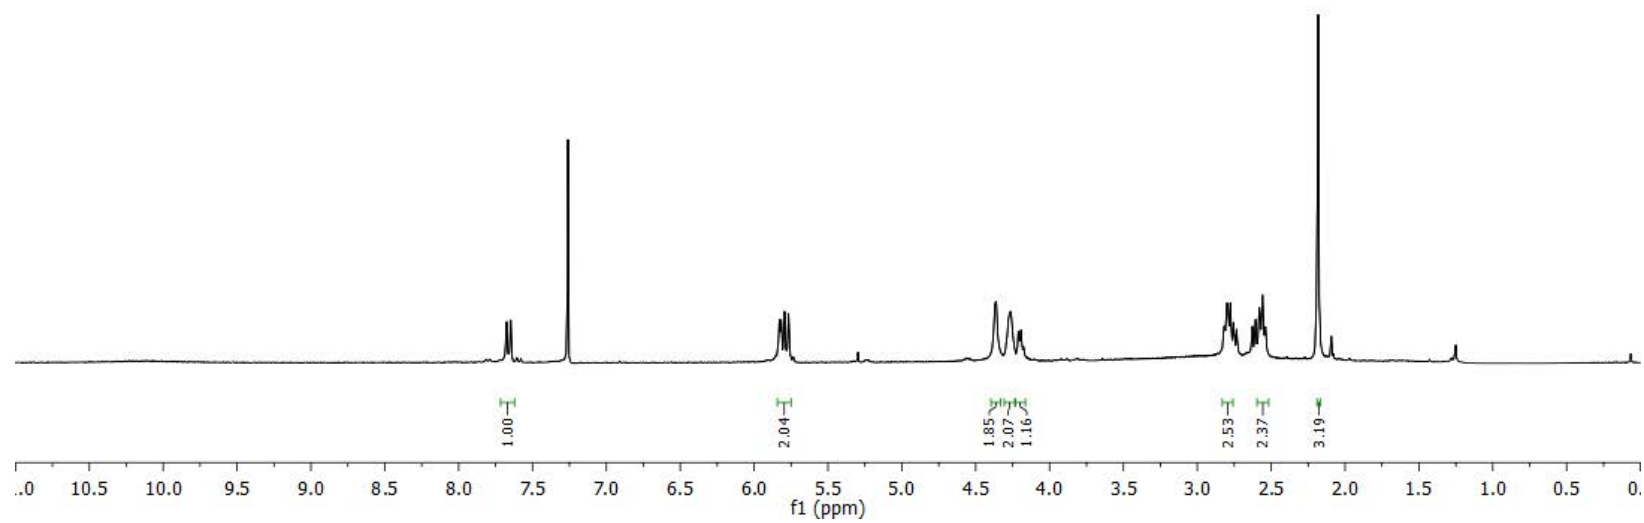



# 5'-*O*-Levulinyl- $\beta$ -D-uridine (2a)

$^{13}\text{C}$ -NMR (75.5 MHz,  $\text{CDCl}_3$ )

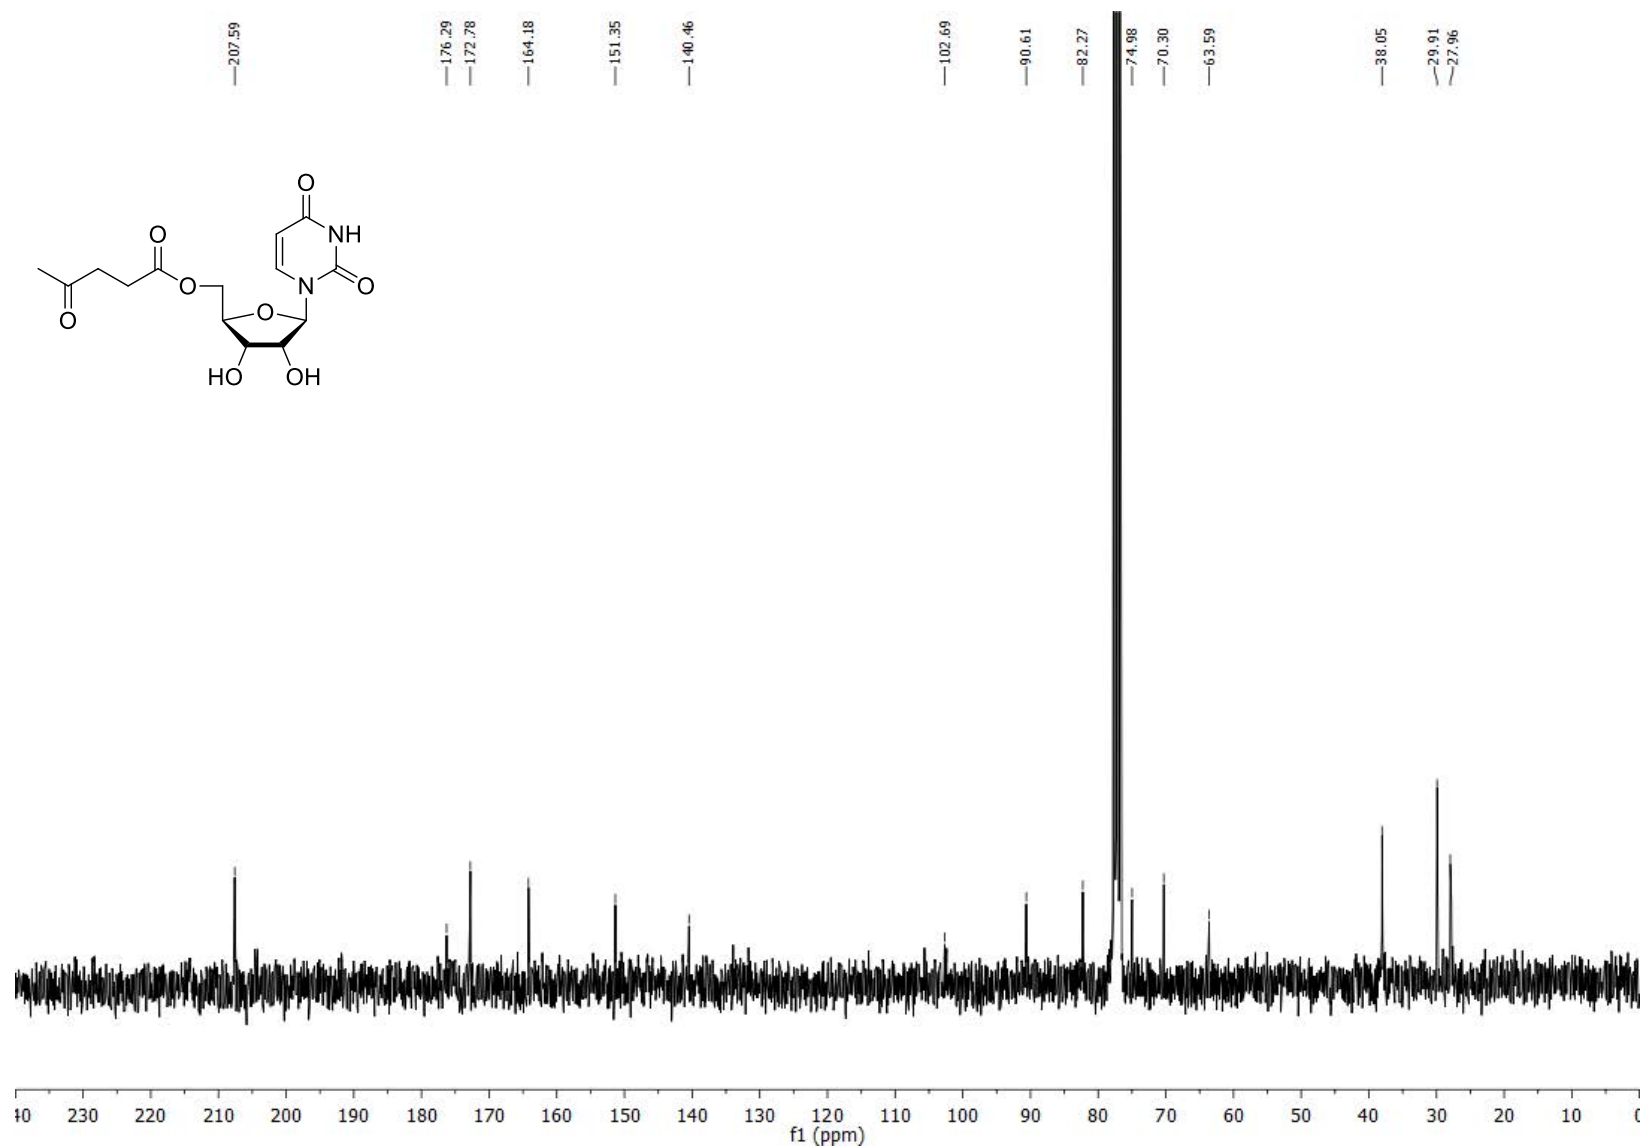

# 5'-*O*-Levulinyl- $\beta$ -D-uridine (2a)

DEPT NMR (75.5 MHz, CDCl<sub>3</sub>)

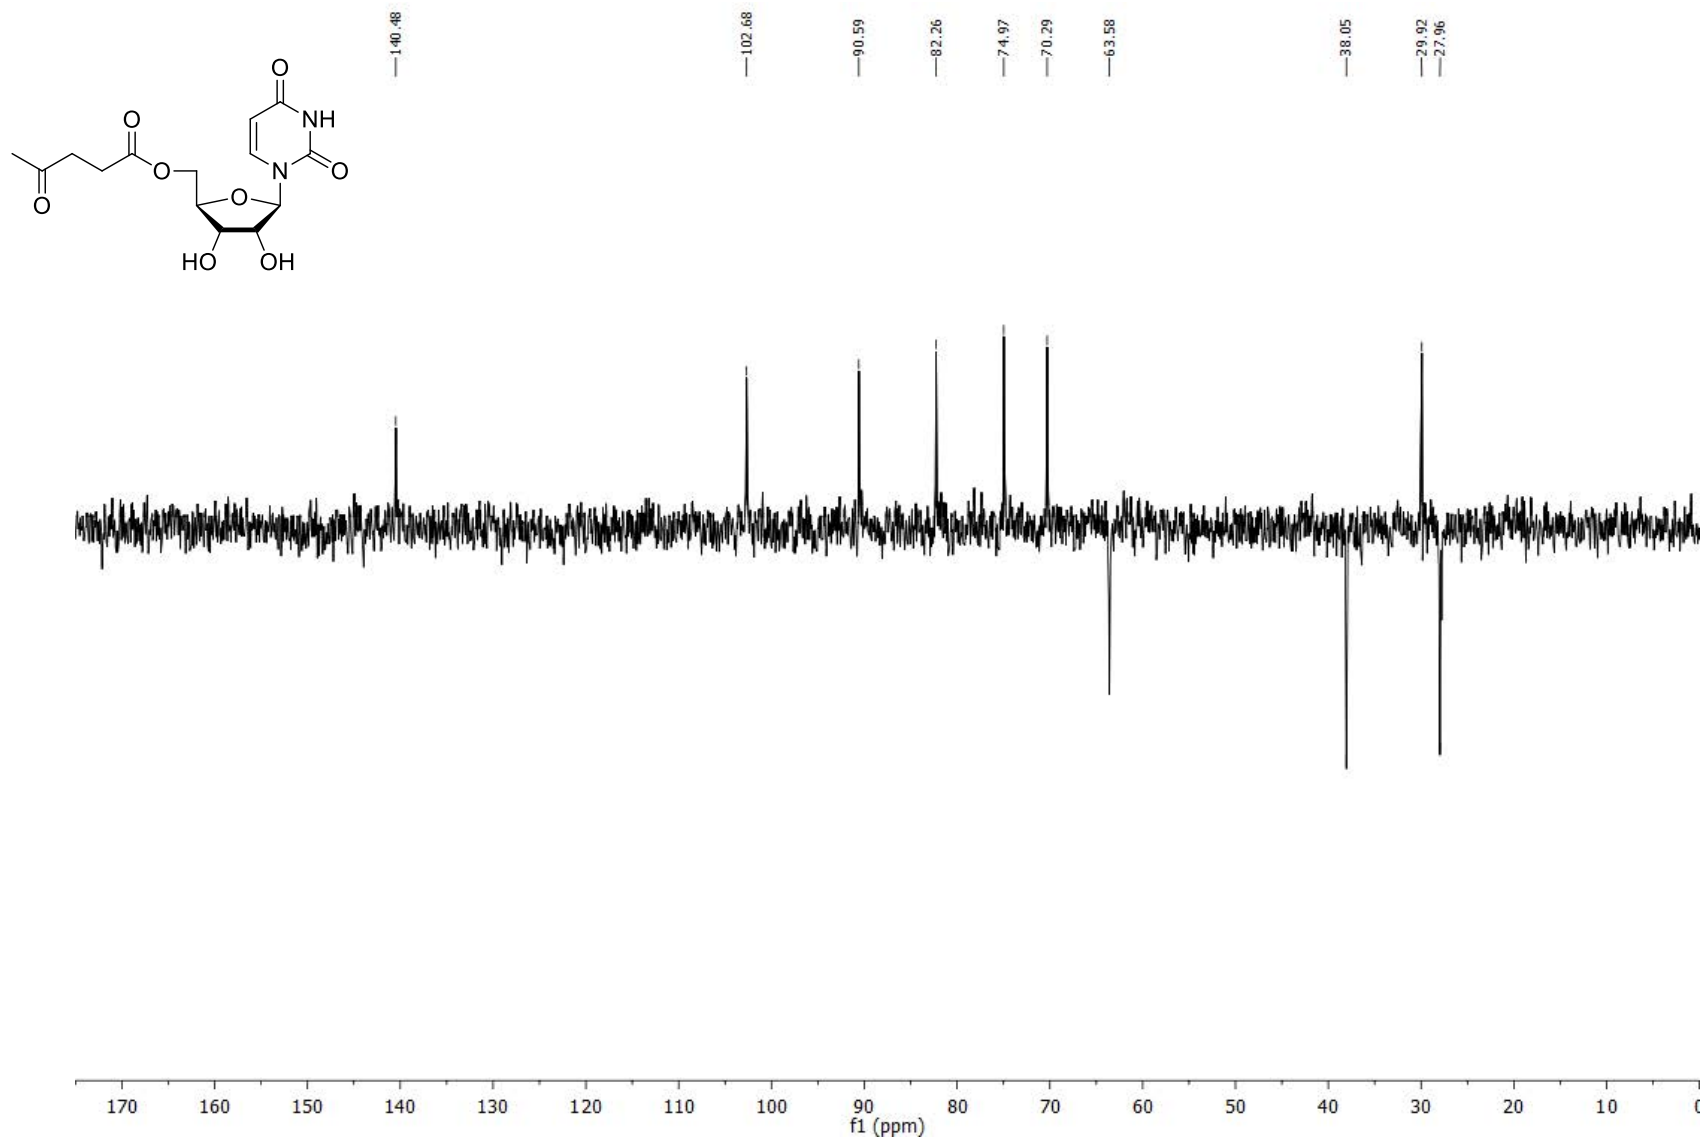

5'-*O*-Levuliny-β-D-uridine (2a)

COSY NMR (CDCl<sub>3</sub>)

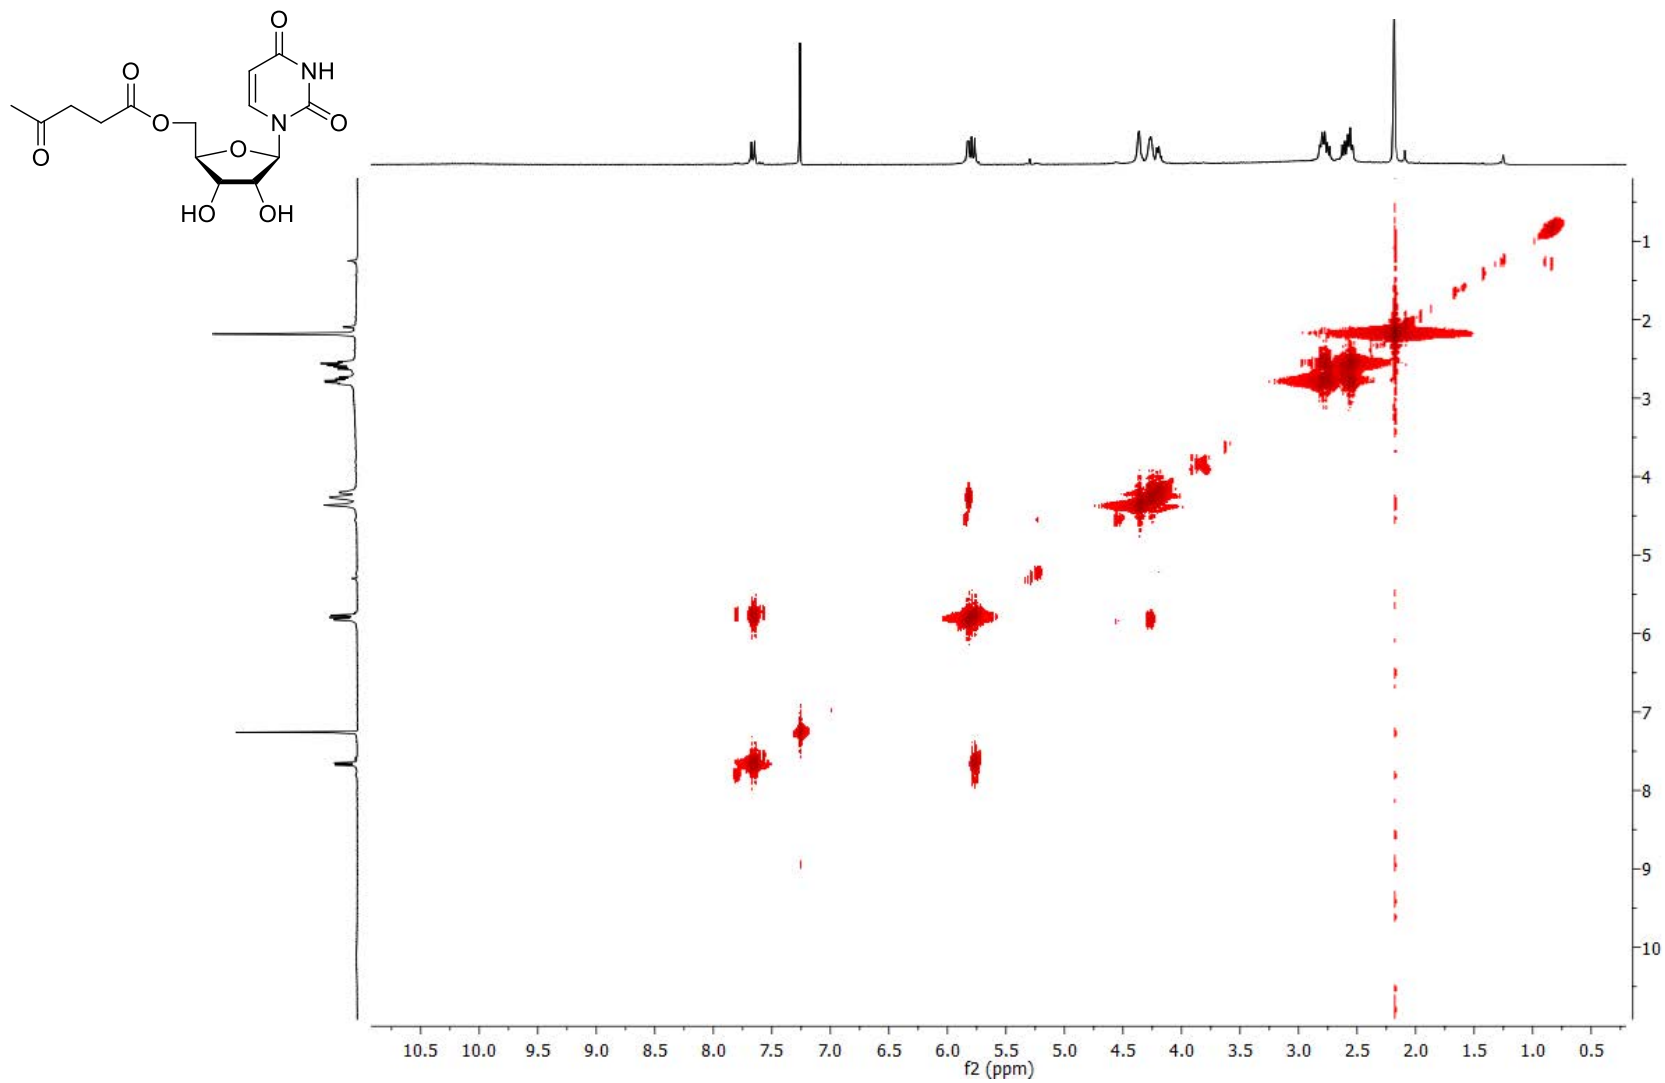

5'-*O*-Levulinyl- $\beta$ -D-uridine (2a)

HSQC NMR (CDCl<sub>3</sub>)

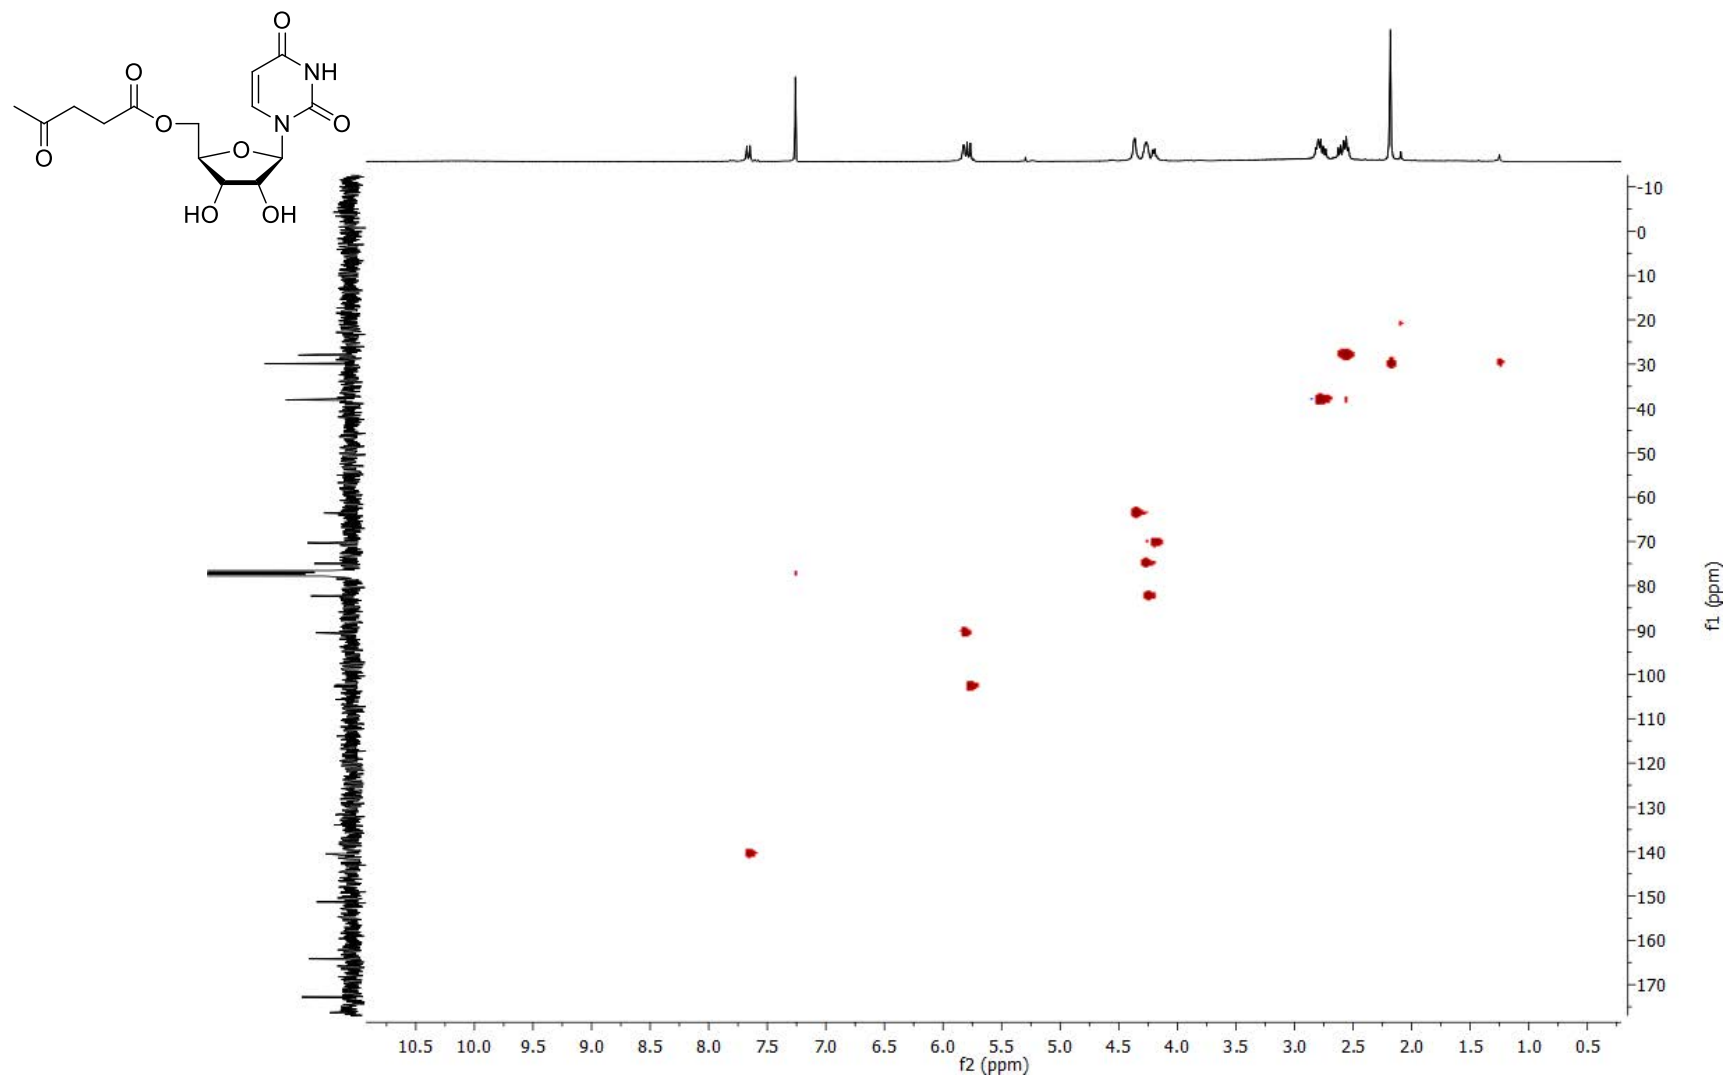

**5'-*O*-Levulinyl- $\beta$ -D-5-methyluridine (2b)**

$^1\text{H-NMR}$  (300.13 MHz,  $\text{CDCl}_3$ )

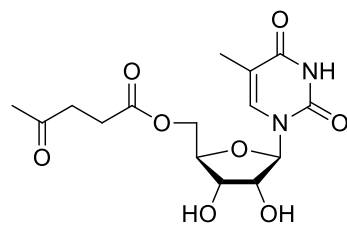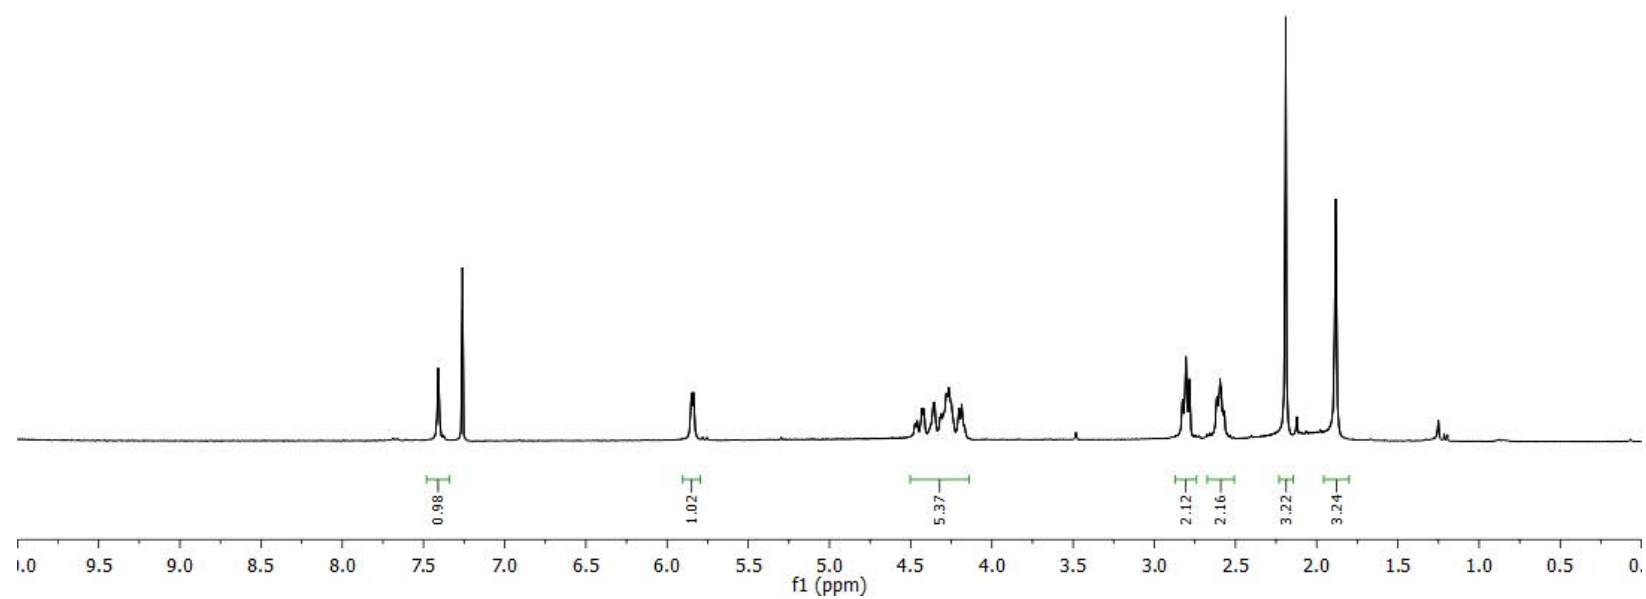

# 5'-*O*-Levulinyl- $\beta$ -D-5-methyluridine (2b)

$^{13}\text{C}$ -NMR (75.5 MHz,  $\text{MeOH-}d_4$ )

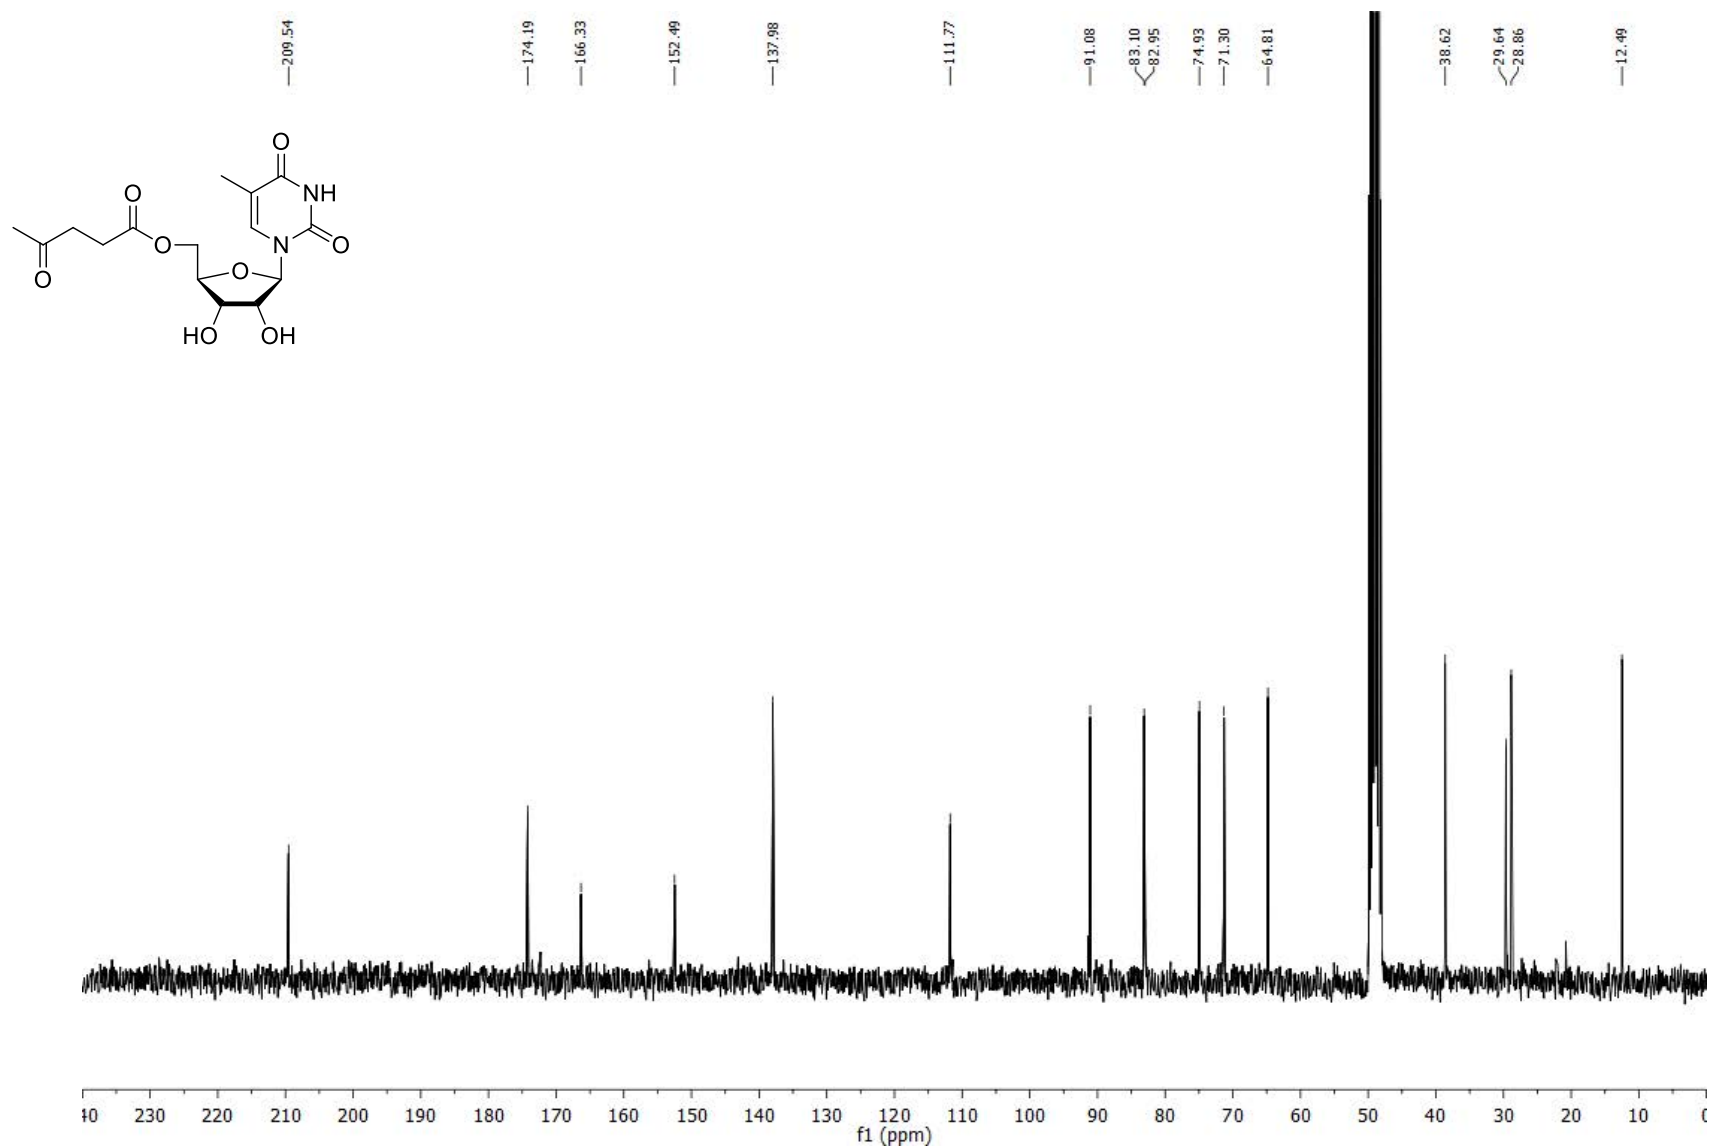

5'-*O*-Levulinyl- $\beta$ -D-5-methyluridine (2b)

DEPT NMR (75.5 MHz, CDCl<sub>3</sub>)

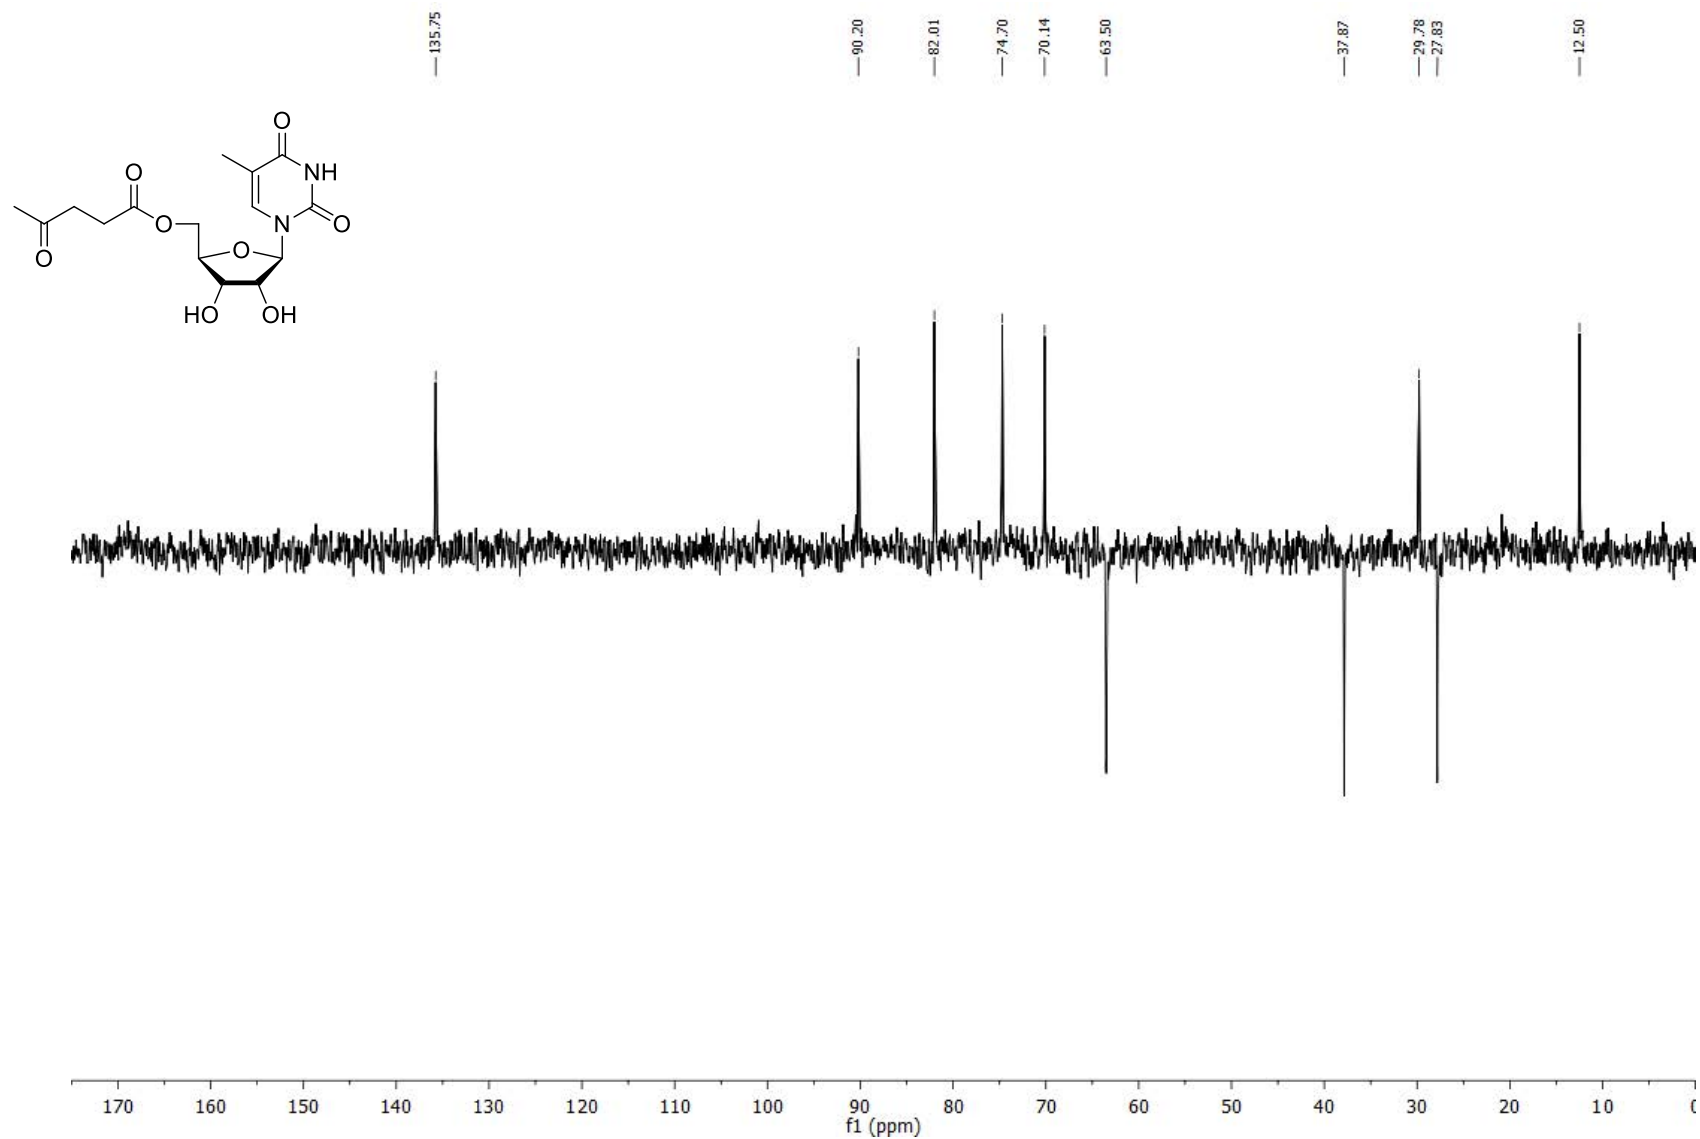

5'-*O*-Levulinyl- $\beta$ -D-5-methyluridine (2b)

COSY NMR (CDCl<sub>3</sub>)

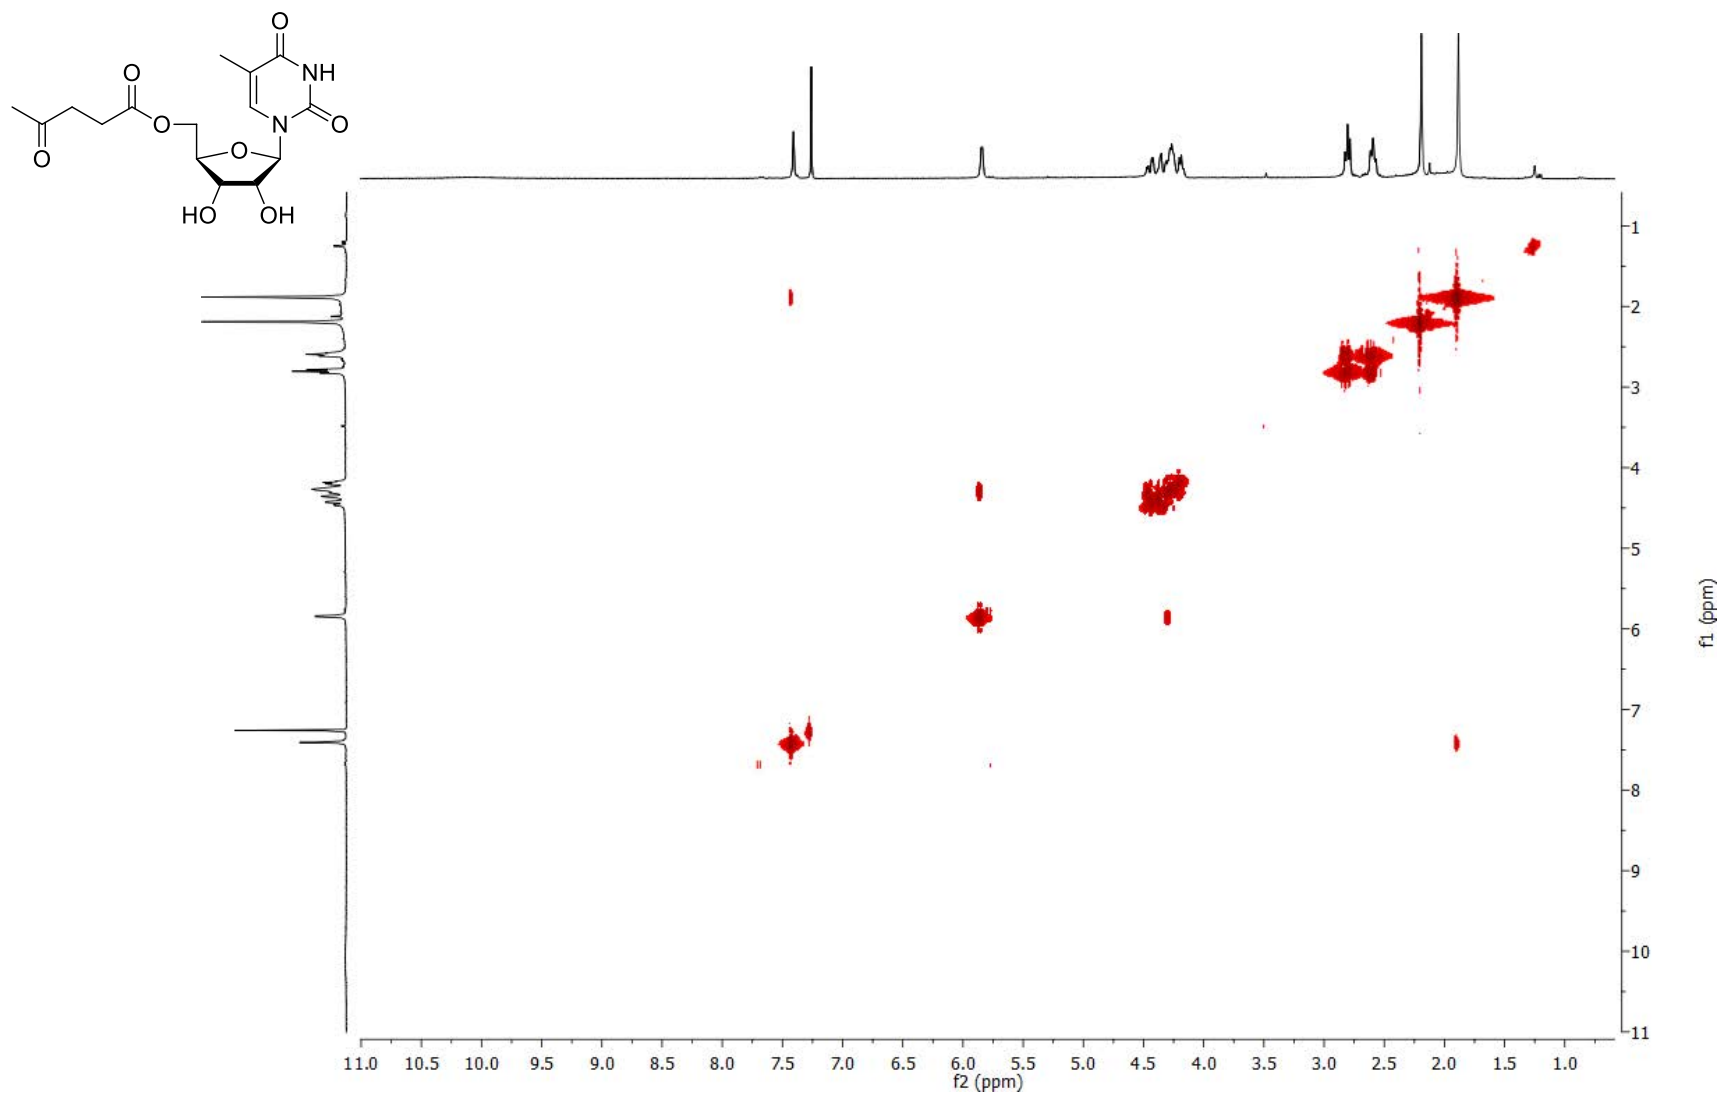



5'-*O*-Levulinyl- $\beta$ -D-5-methyluridine (2b)

HSQC NMR (CDCl<sub>3</sub>)

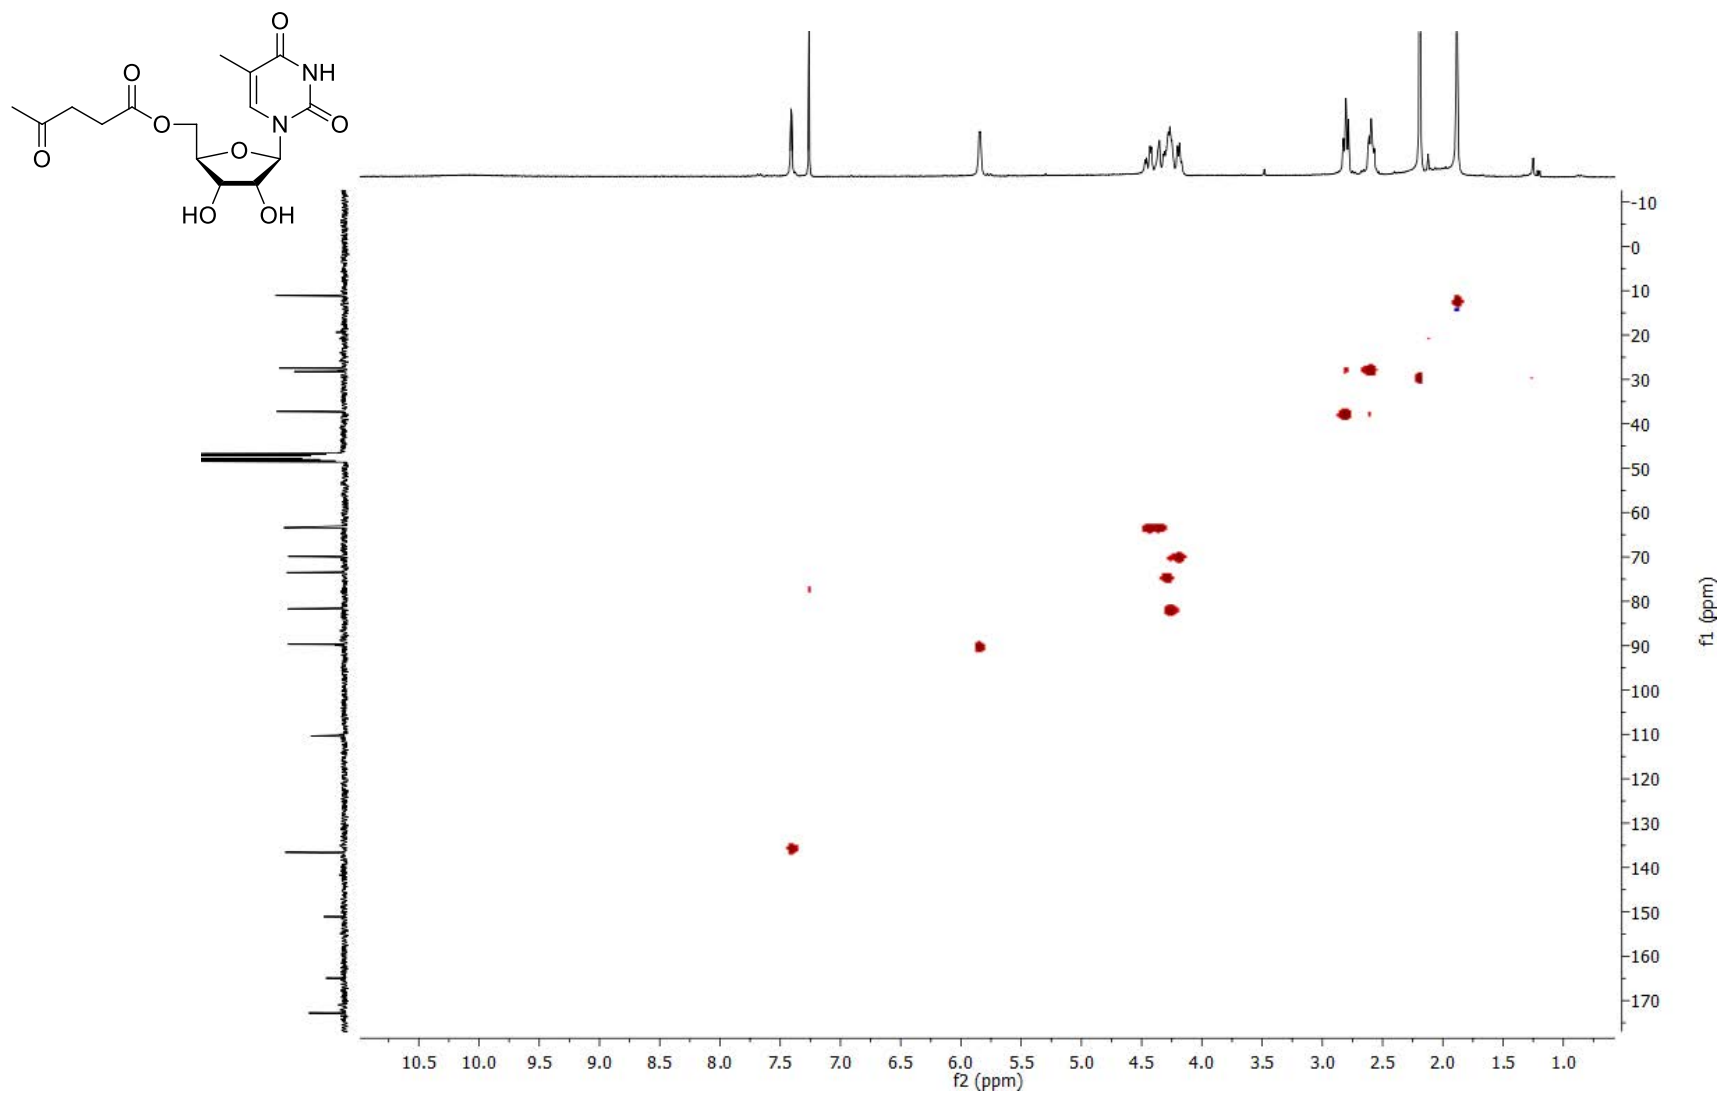

**5'-*O*-Levulinyl-β-D-cytidine (2c)**

<sup>1</sup>H-NMR (300.13 MHz, MeOD-*d*<sub>4</sub>)

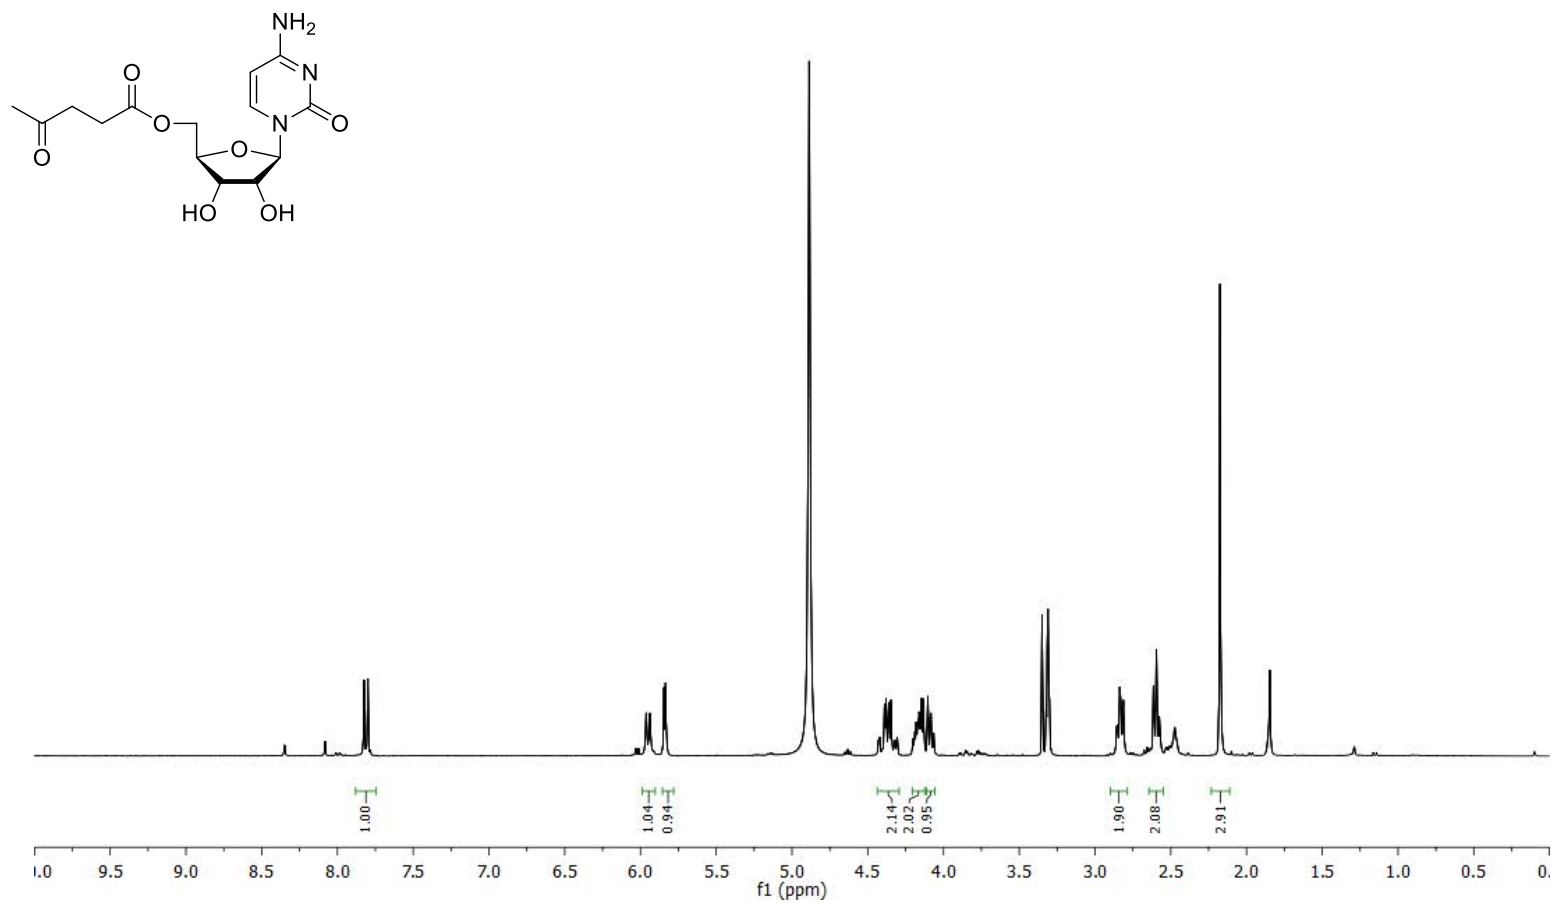

# 5'-*O*-Levulinyl- $\beta$ -D-cytidine (2c)

$^{13}\text{C}$ -NMR (75.5 MHz,  $\text{MeOD-}d_4$ )

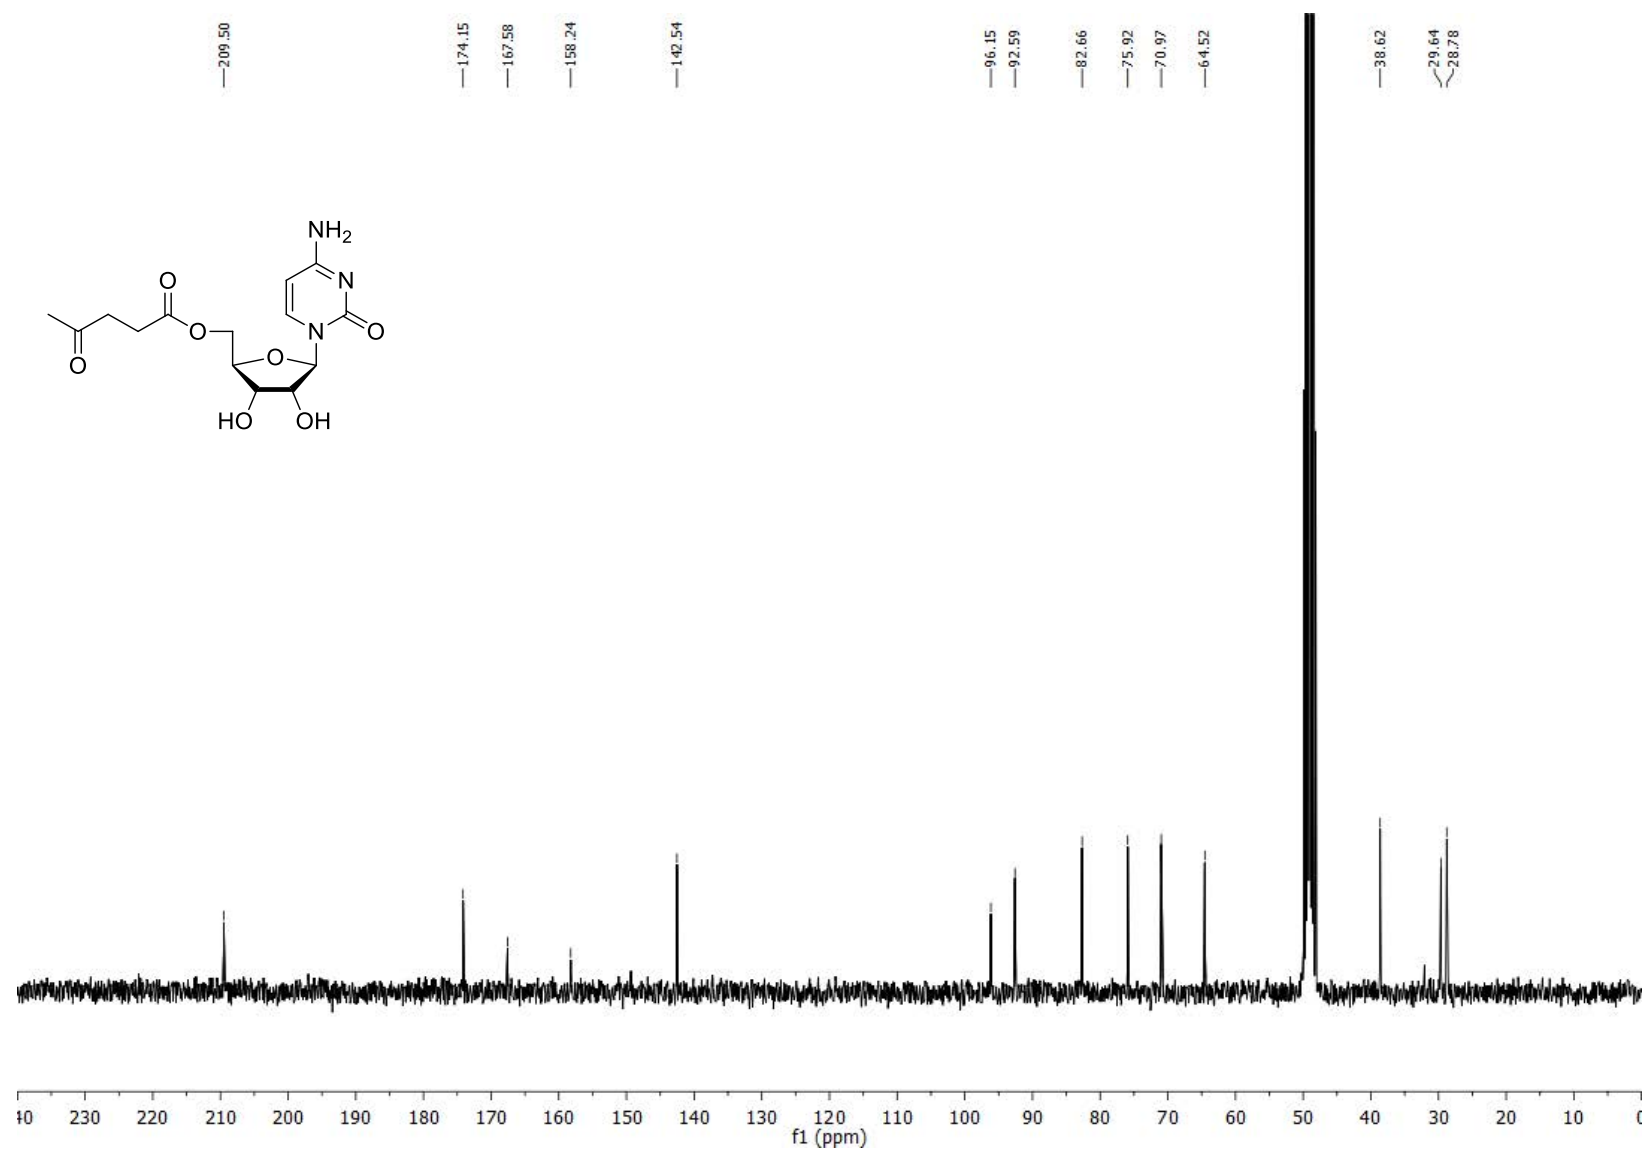

# 5'-*O*-Levulinyl-β-D-cytidine (2c)

DEPT NMR (75.5 MHz, MeOD-*d*<sub>4</sub>)

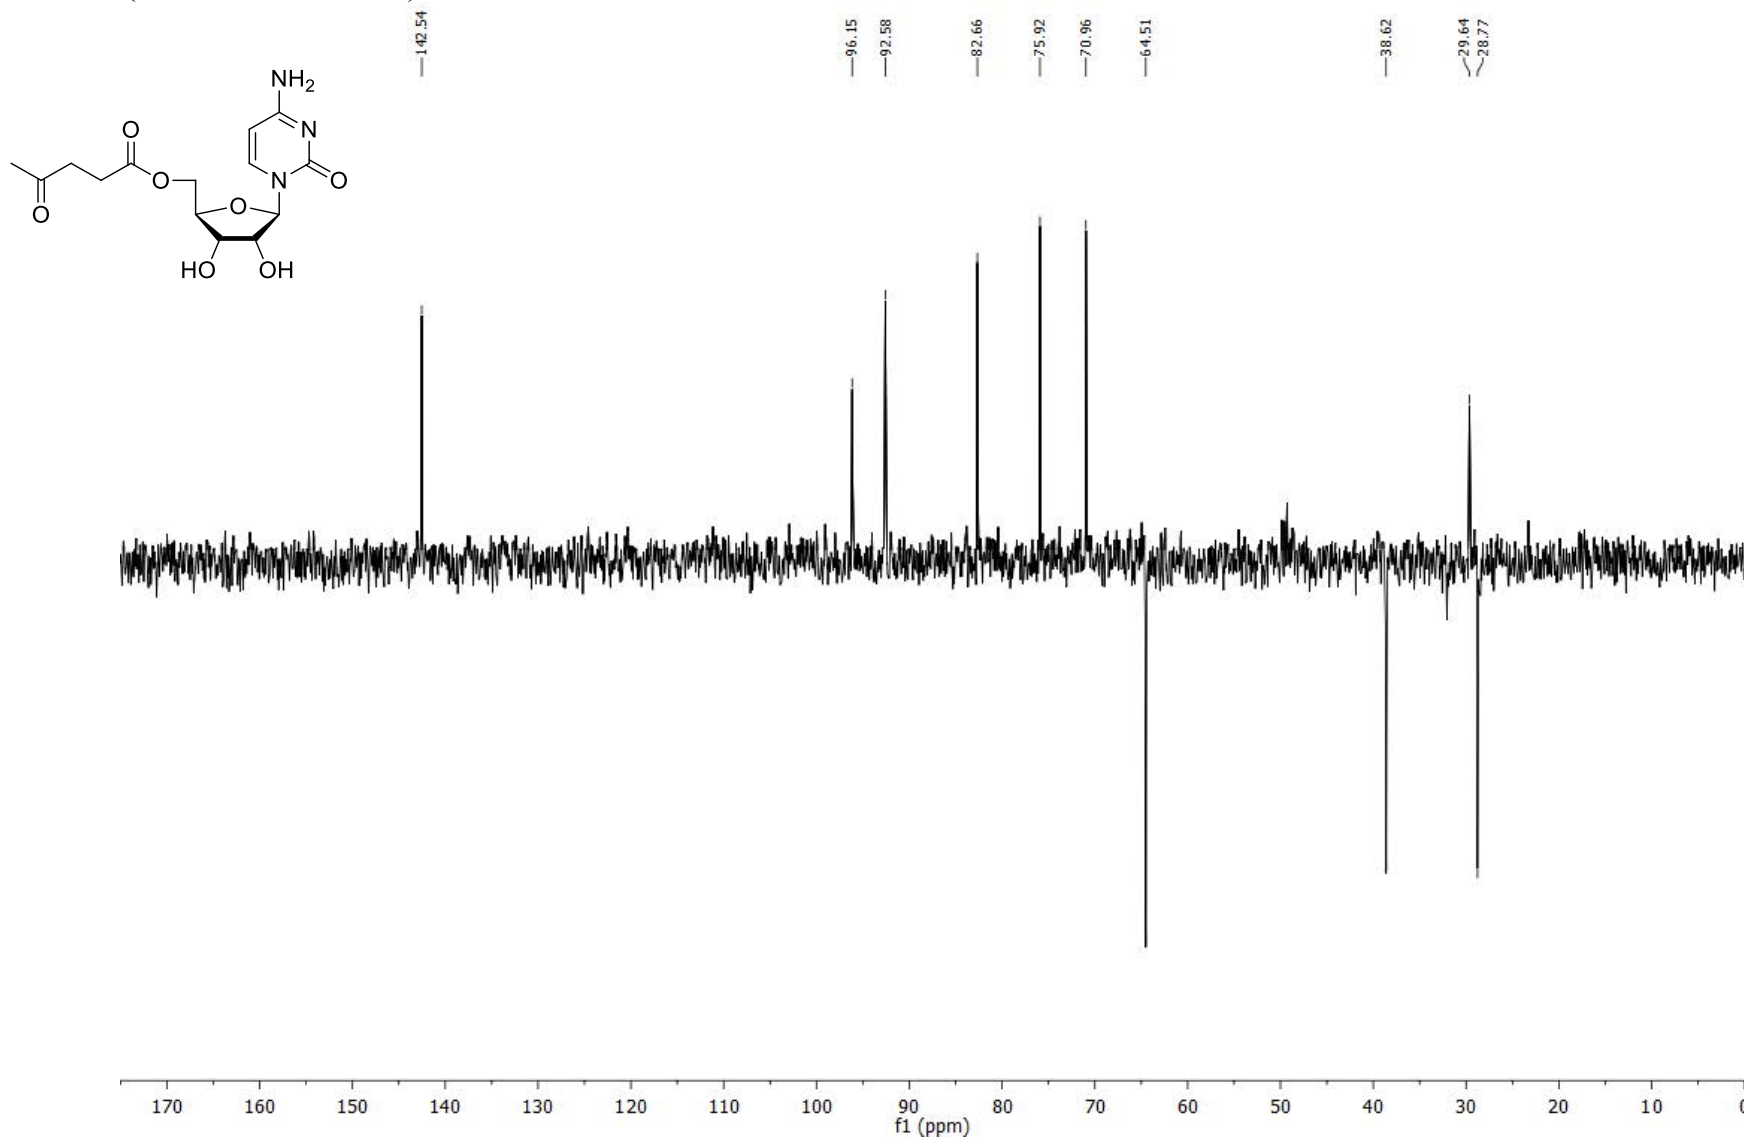

## 5'-*O*-Levulinyl- $\beta$ -D-cytidine (2c)

COSY NMR (MeOD- $d_4$ )

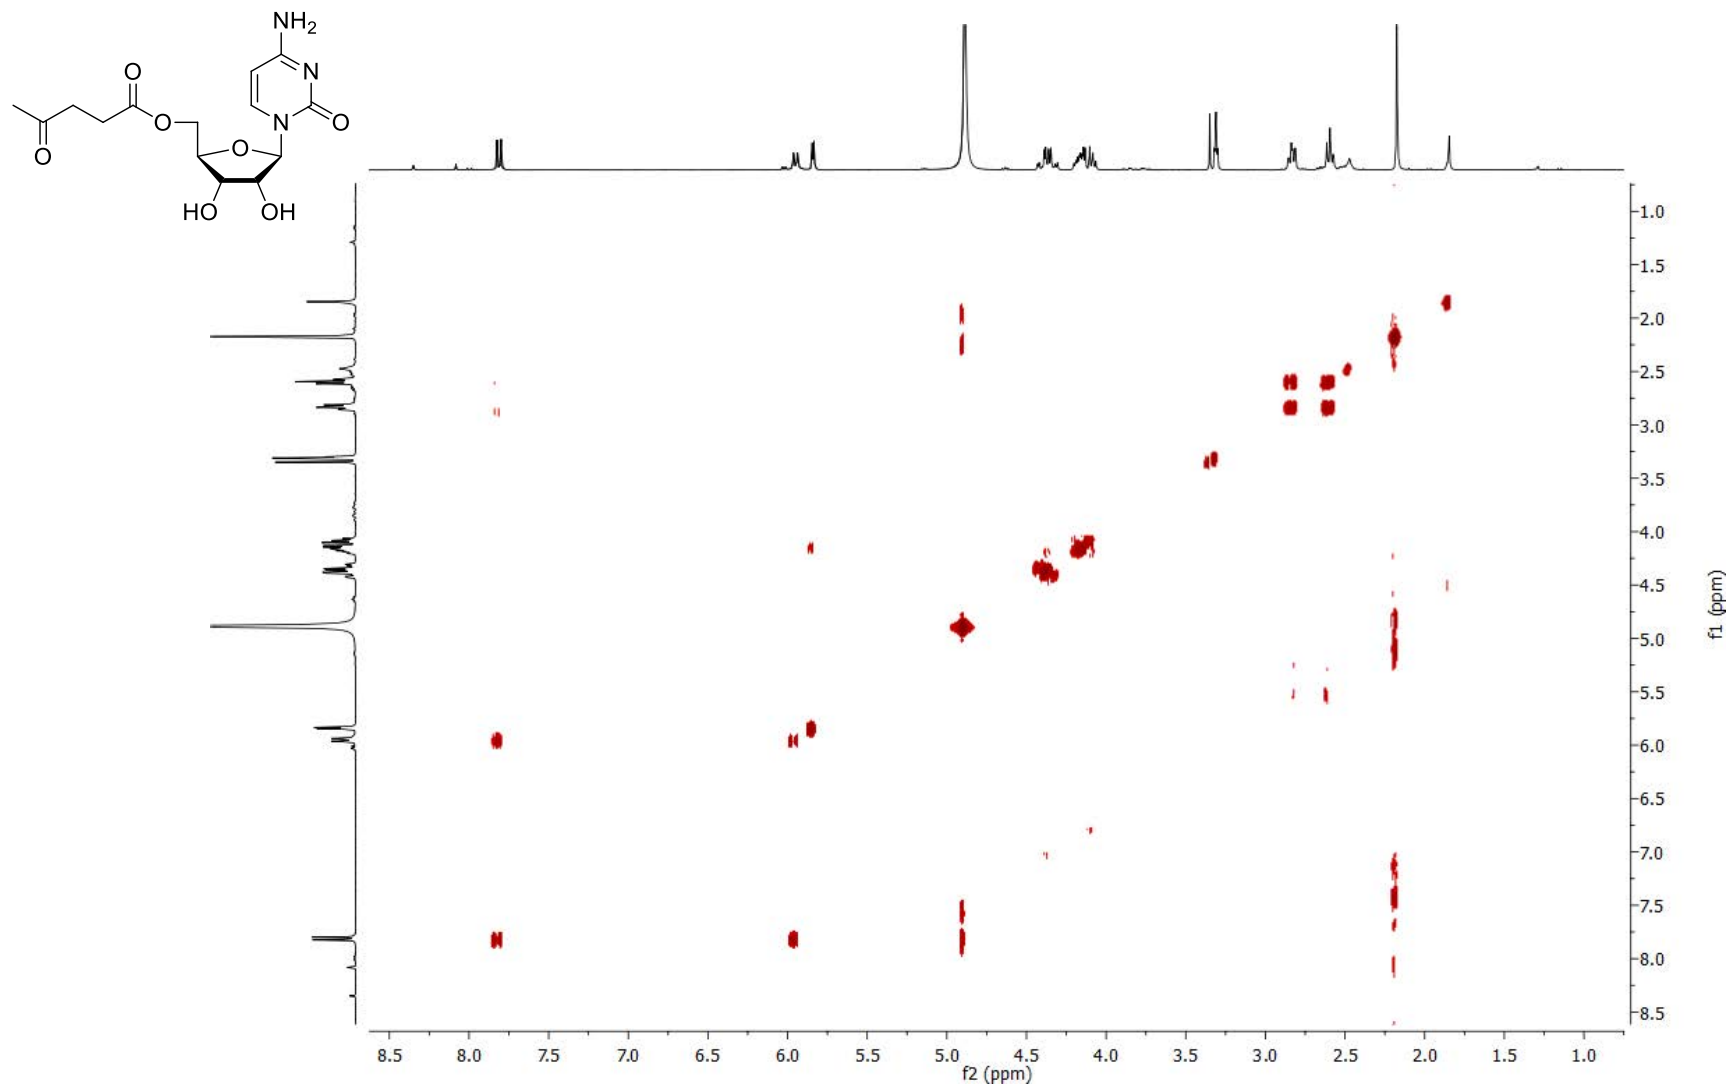

## 5'-*O*-Levulinyl- $\beta$ -D-cytidine (2c)

HSQC NMR (MeOD- $d_4$ )

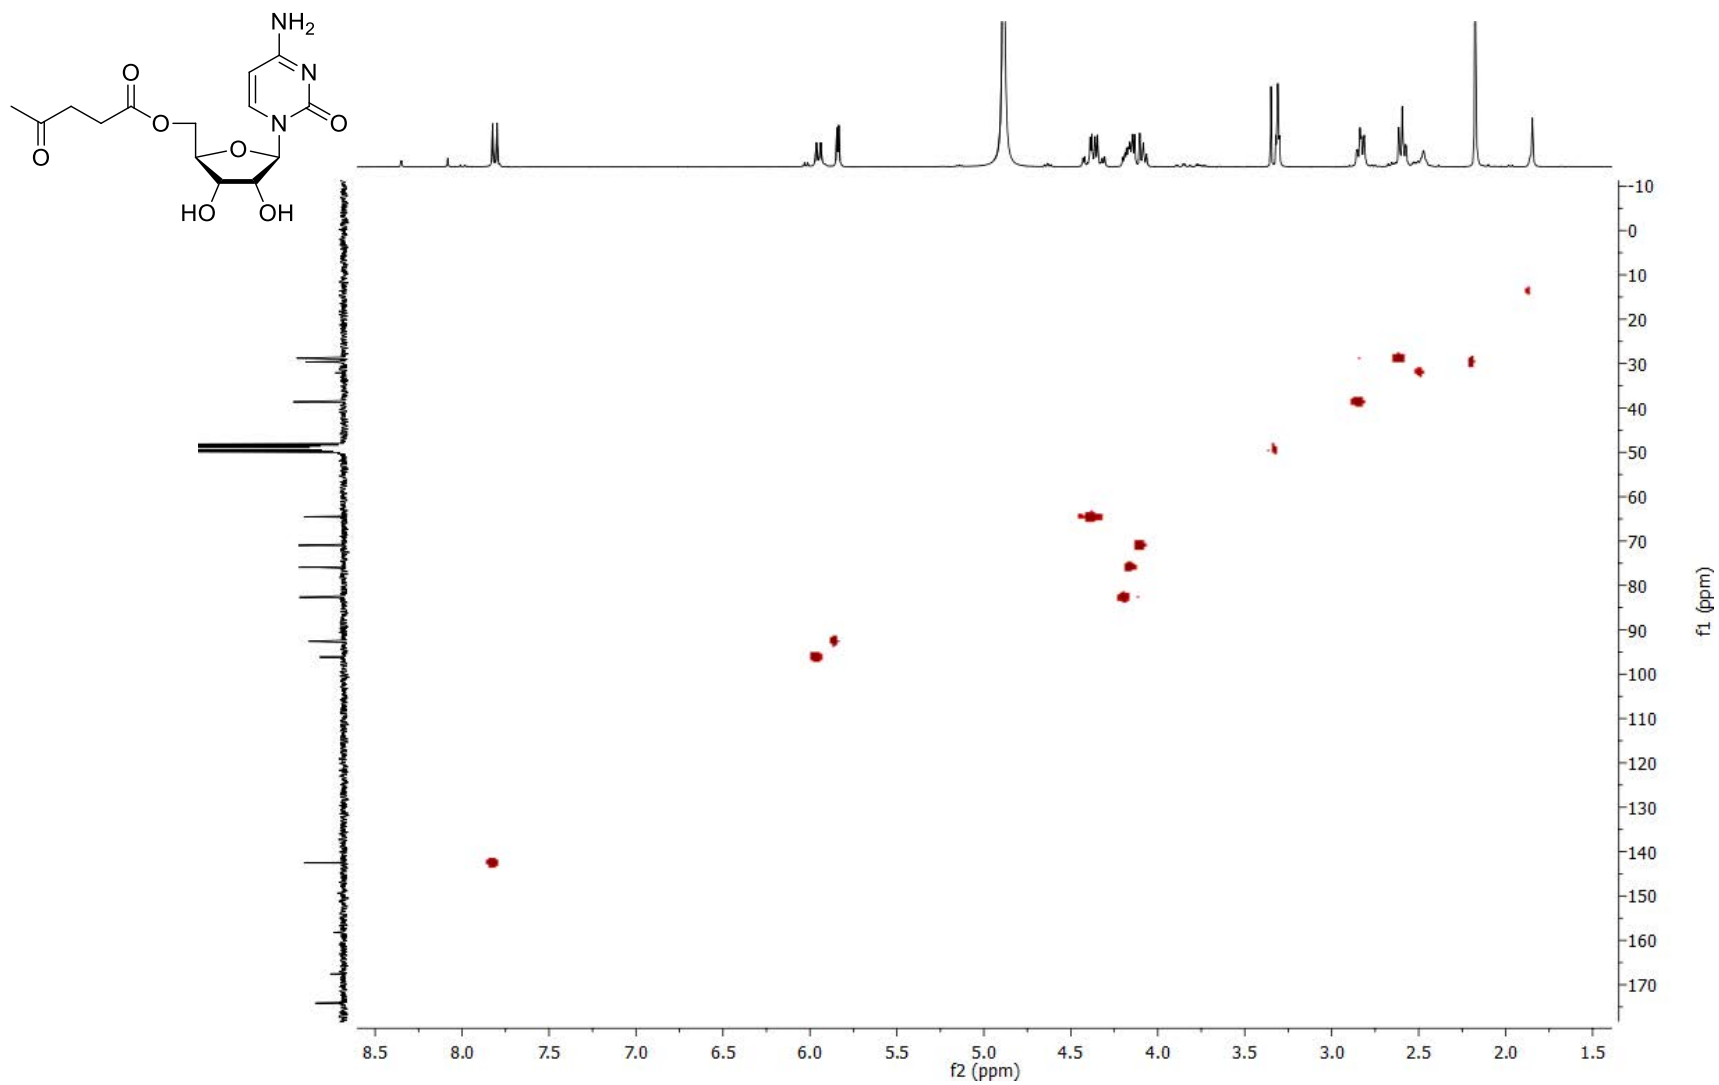

*N*-Benzoyl-5'-*O*-Levulinyl- $\beta$ -D-cytidine (2d)

$^1\text{H}$ -NMR (300.13 MHz,  $\text{DMSO}-d_6$ )

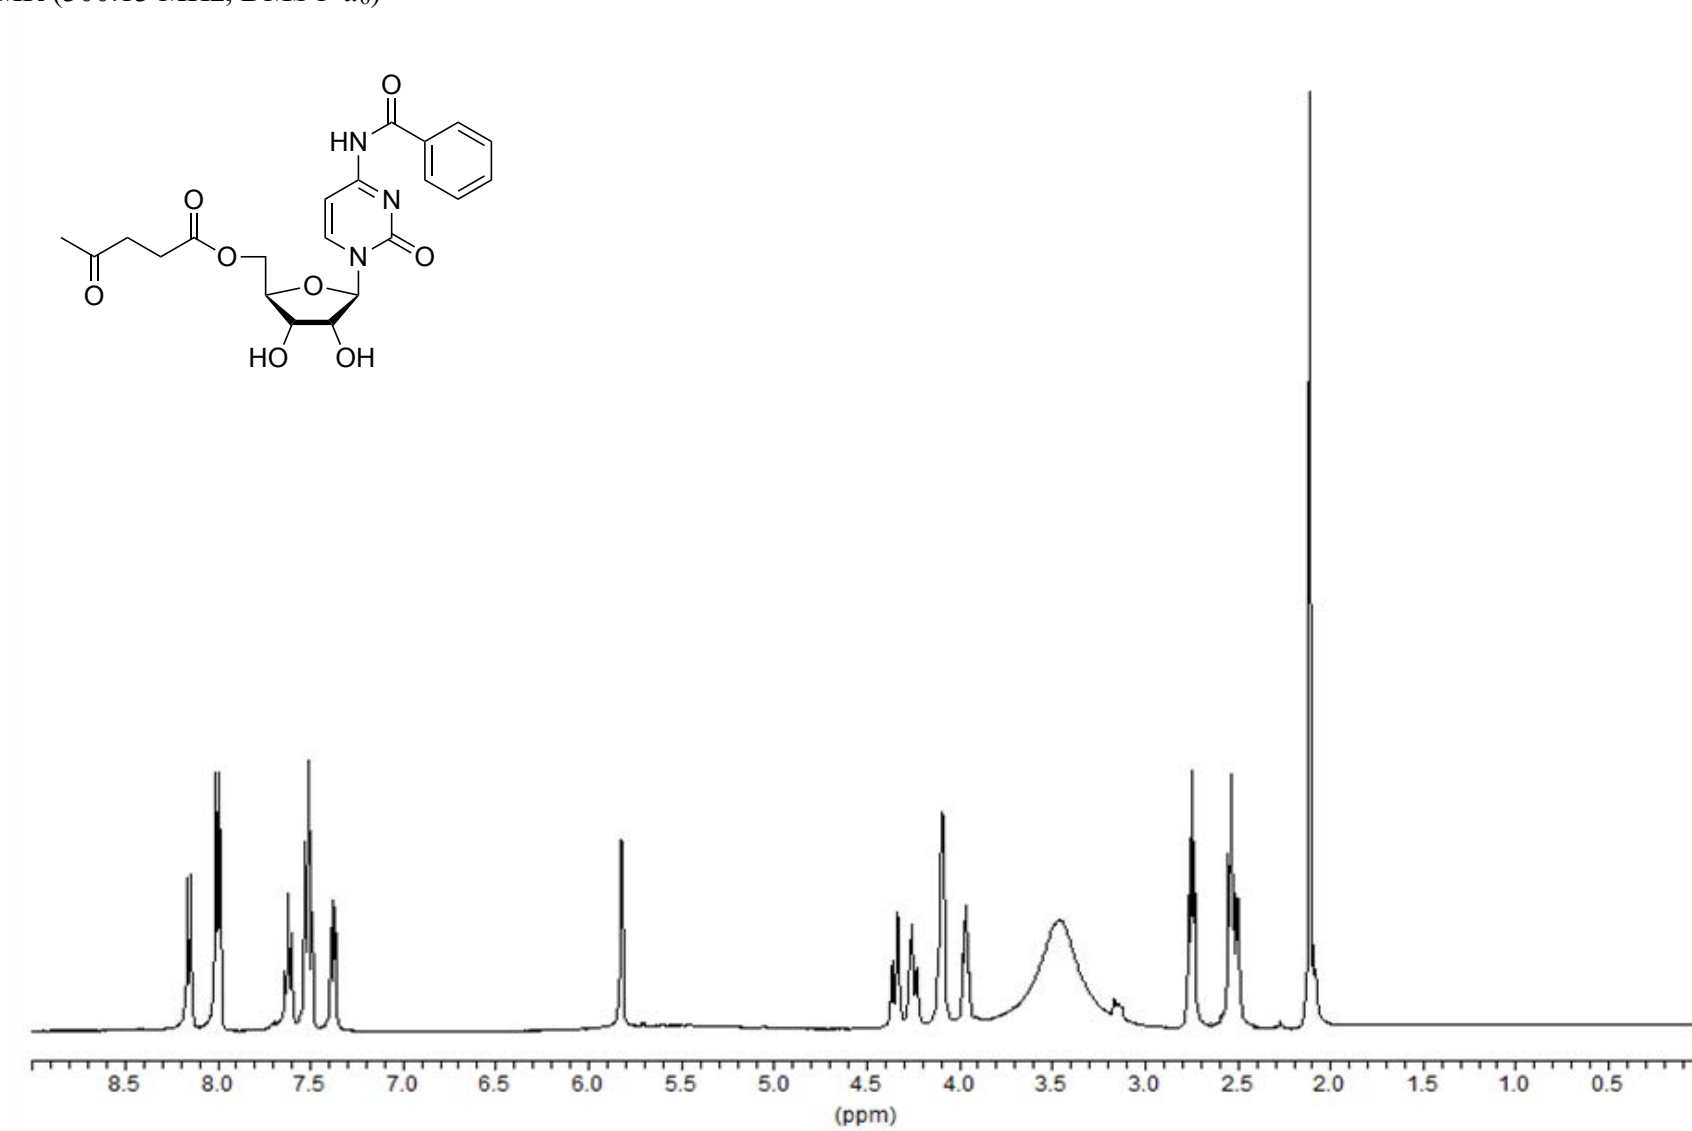

*N*-Benzoyl-5'-*O*-Levulinyl- $\beta$ -D-cytidine (2d)

$^{13}\text{C}$ -NMR (75.5 MHz,  $\text{DMSO-}d_6$ )

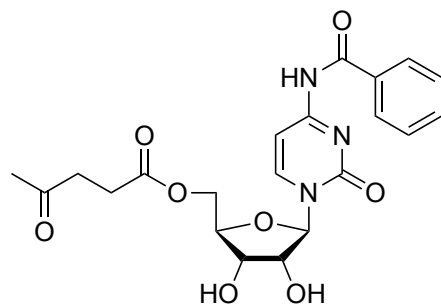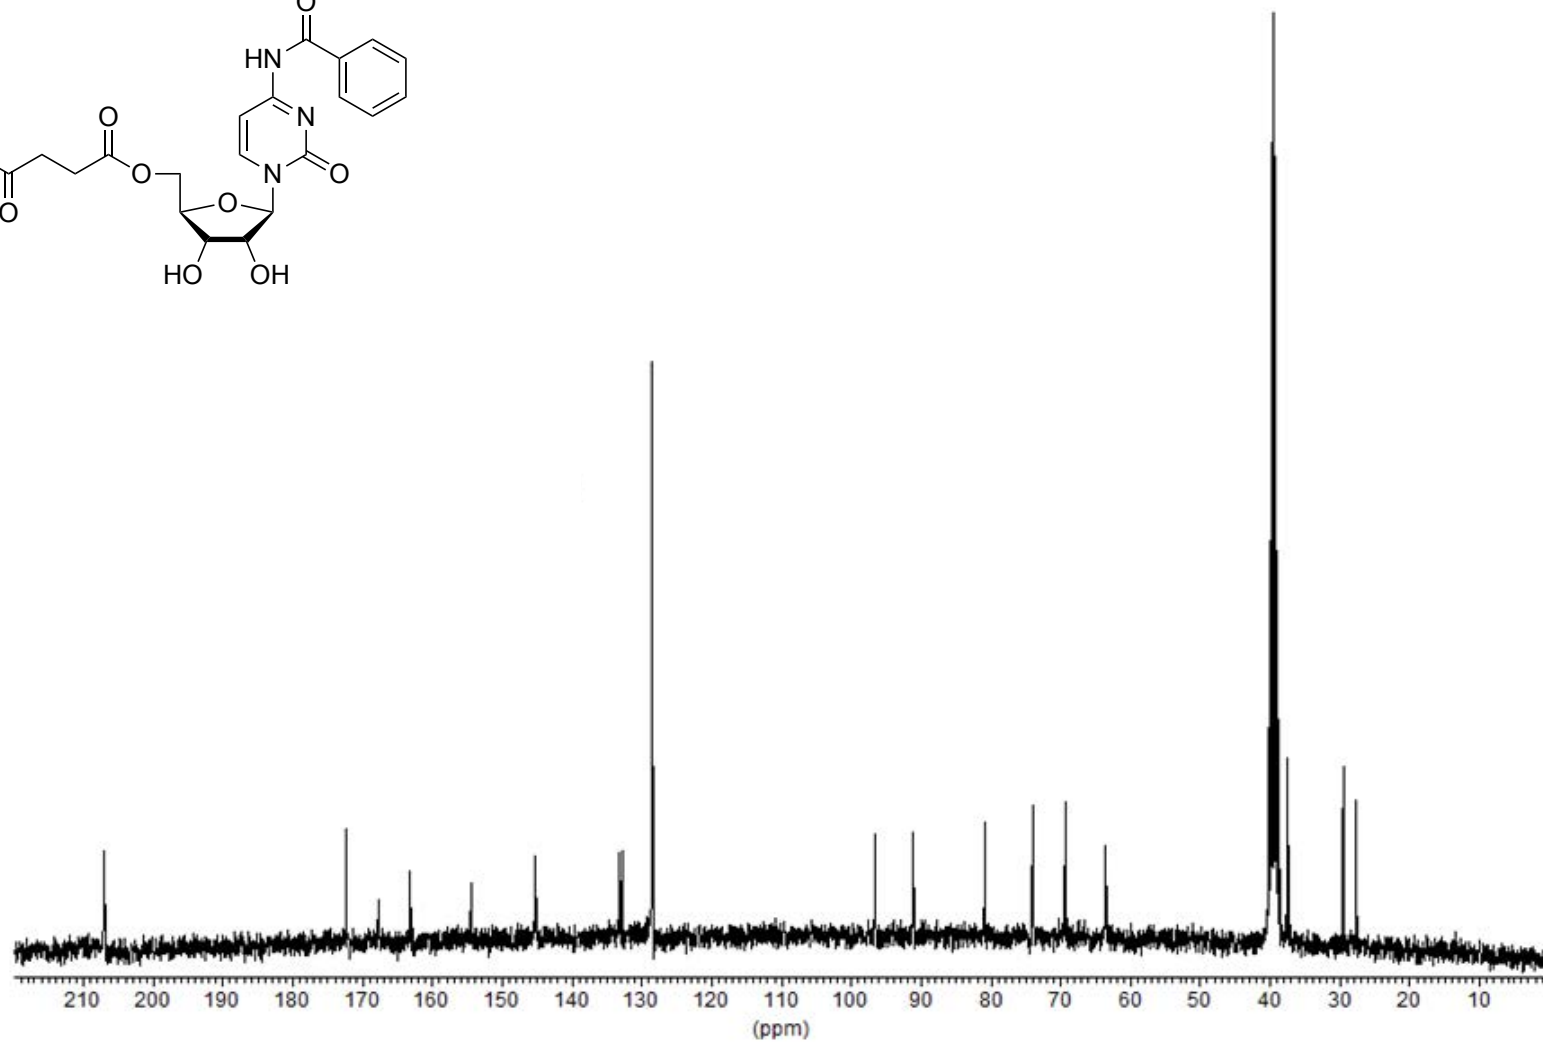



*N*-Benzoyl-5'-*O*-Levulinyl- $\beta$ -D-cytidine (2d)

DEPT NMR (75.5 MHz, DMSO-*d*<sub>6</sub>)

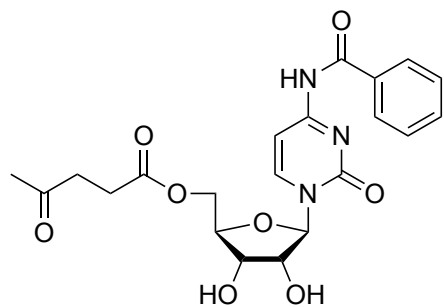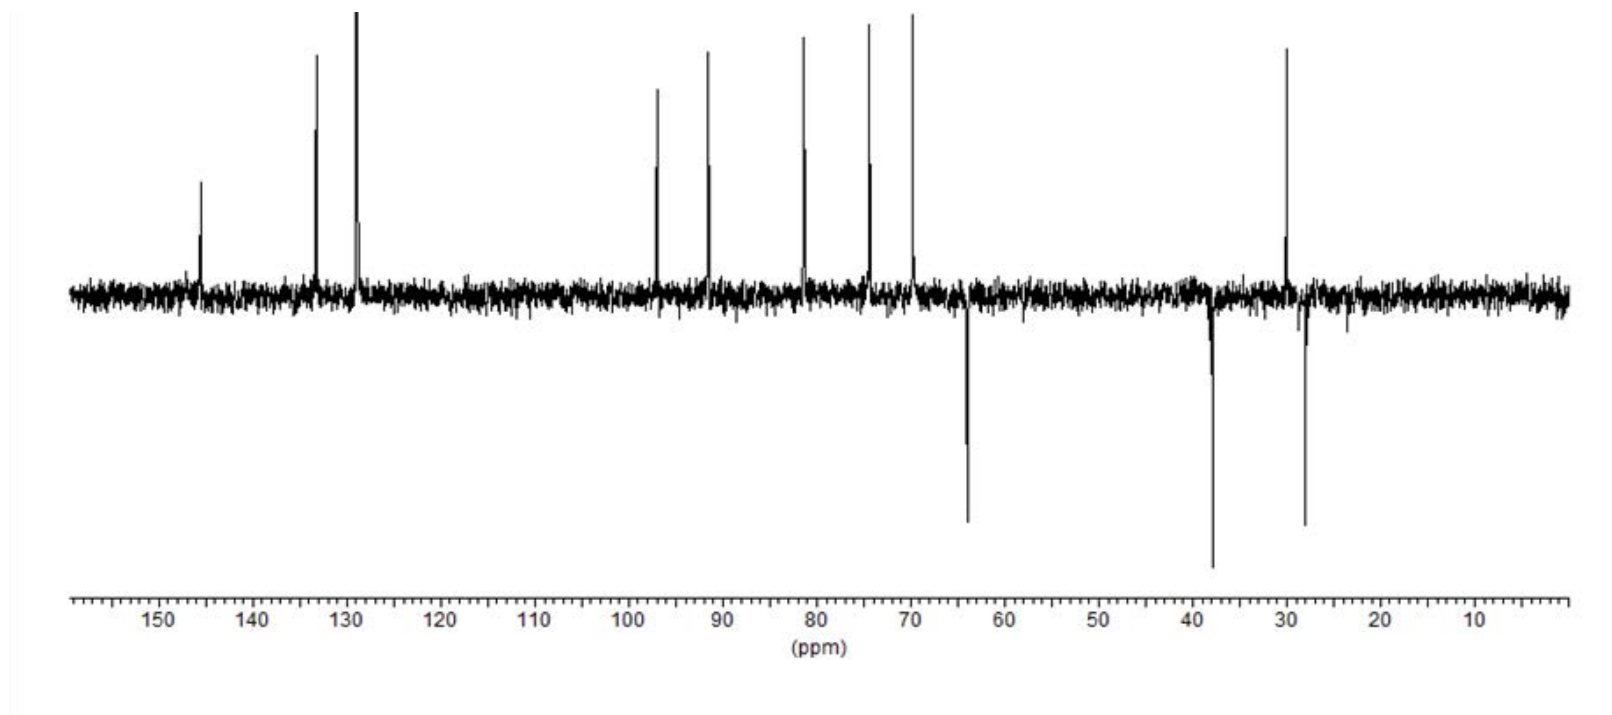

*N*-Benzoyl-5'-*O*-Levulinyl- $\beta$ -D-cytidine (2d)

COSY NMR (300.13 MHz, DMSO- $d_6$ )

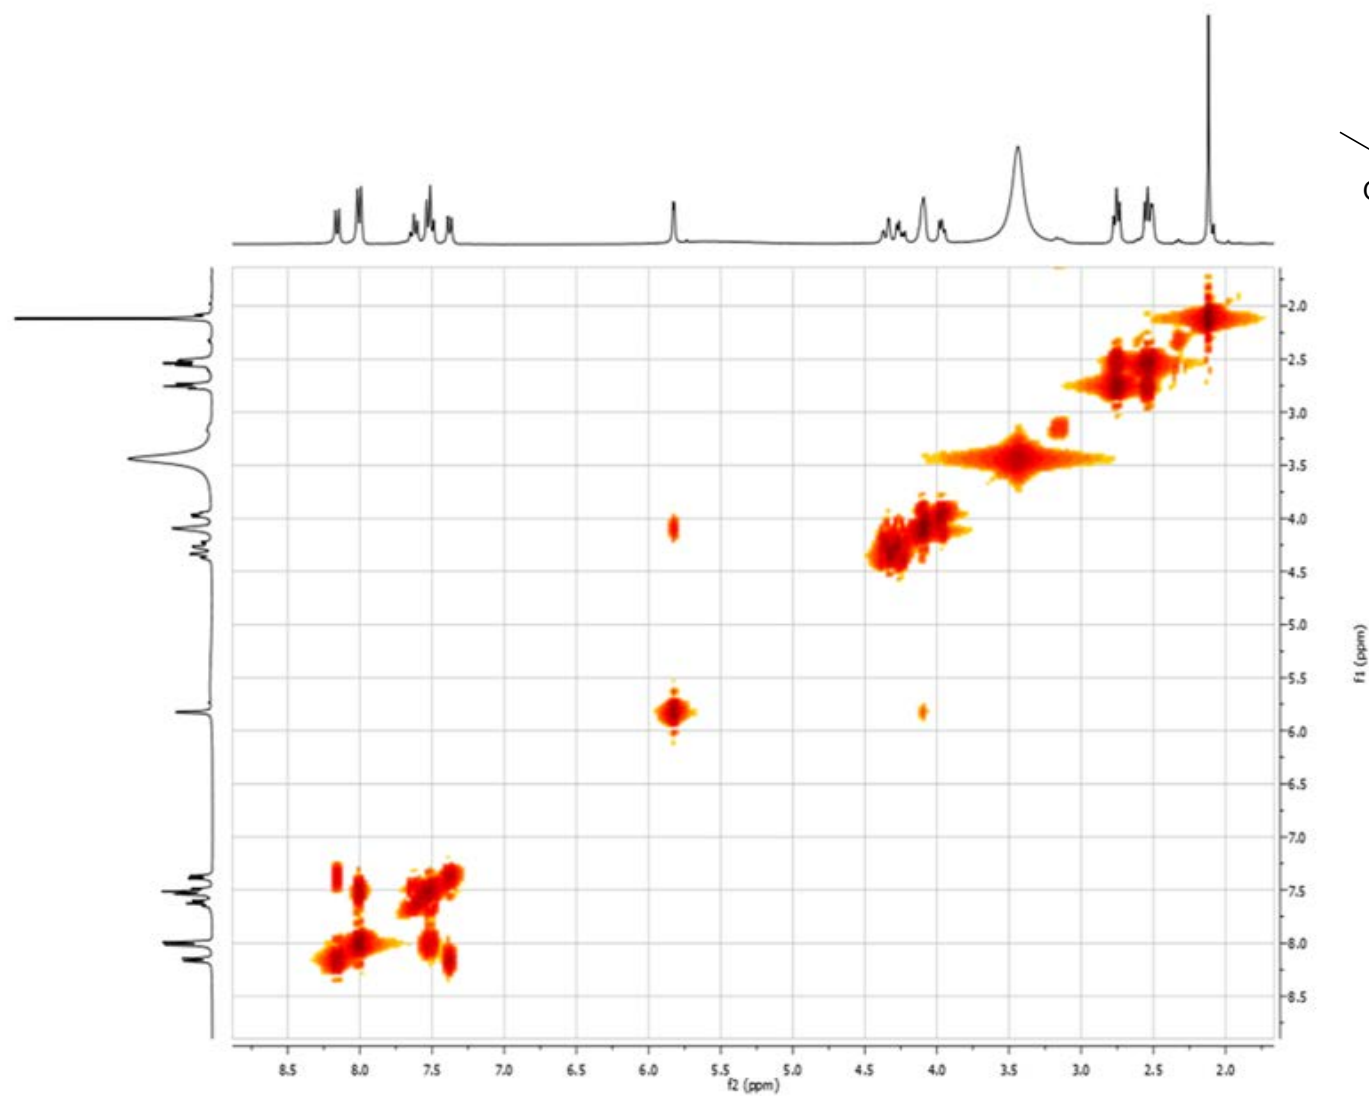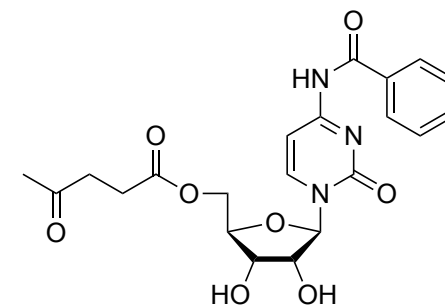

*N*-Benzoyl-5'-*O*-Levulinyl- $\beta$ -D-cytidine (2d)

HSQC NMR (300.13 MHz, DMSO- $d_6$ )

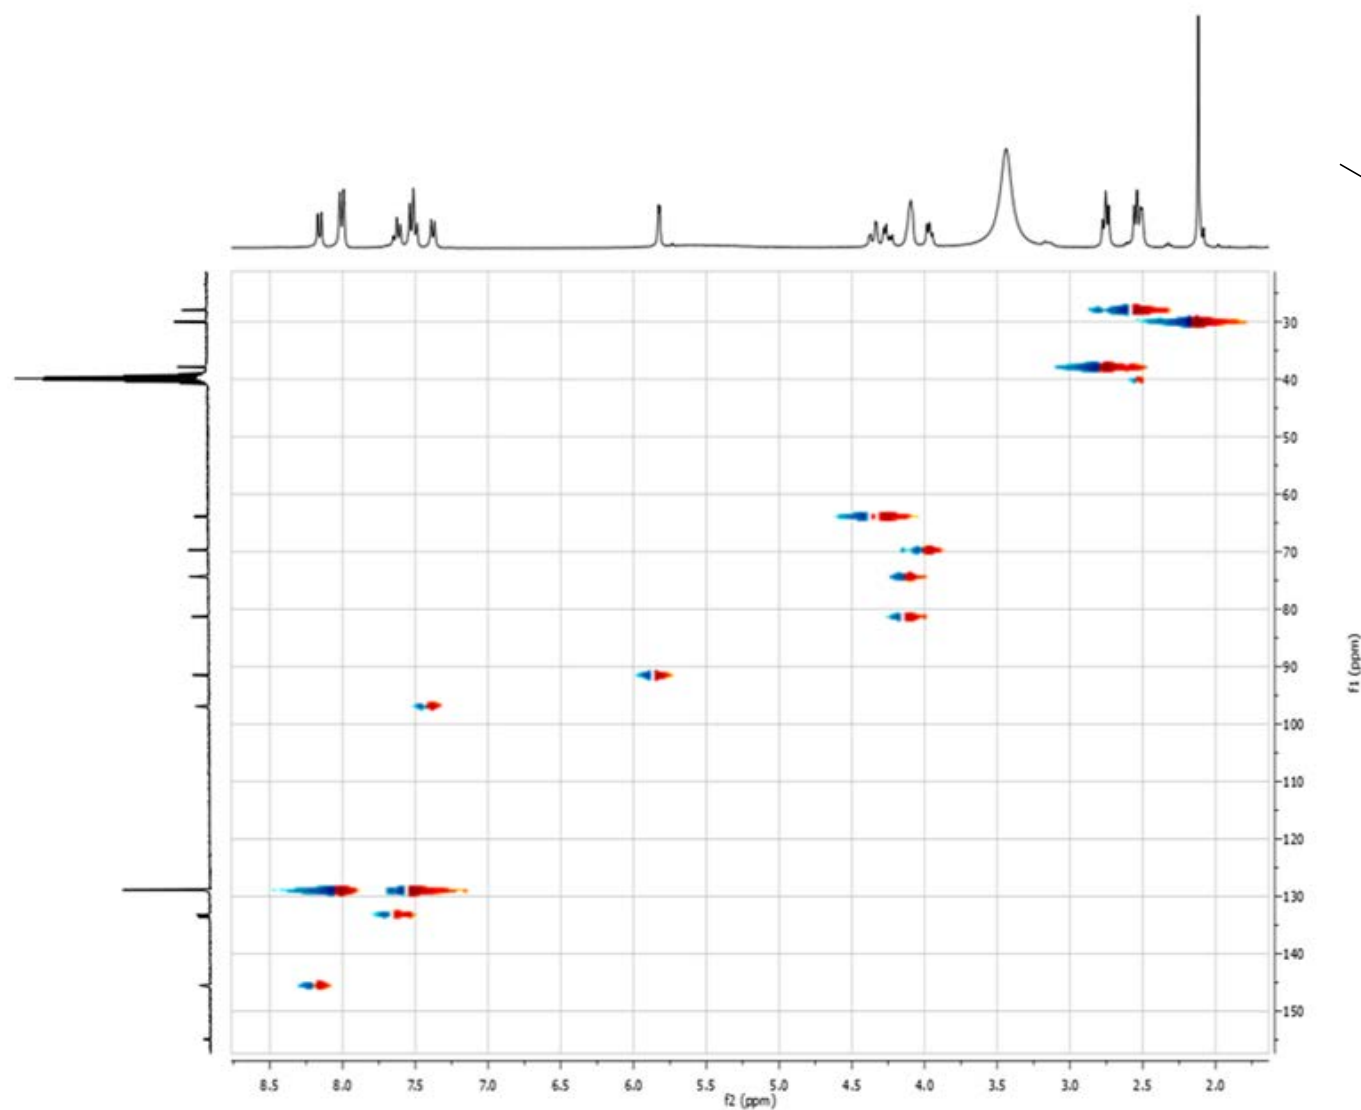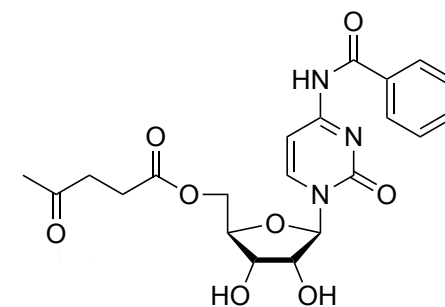

*N*-Benzoyl-5'-*O*-Levulinyl- $\beta$ -D-cytidine (2d)

HMBC NMR (300.13 MHz, DMSO- $d_6$ )

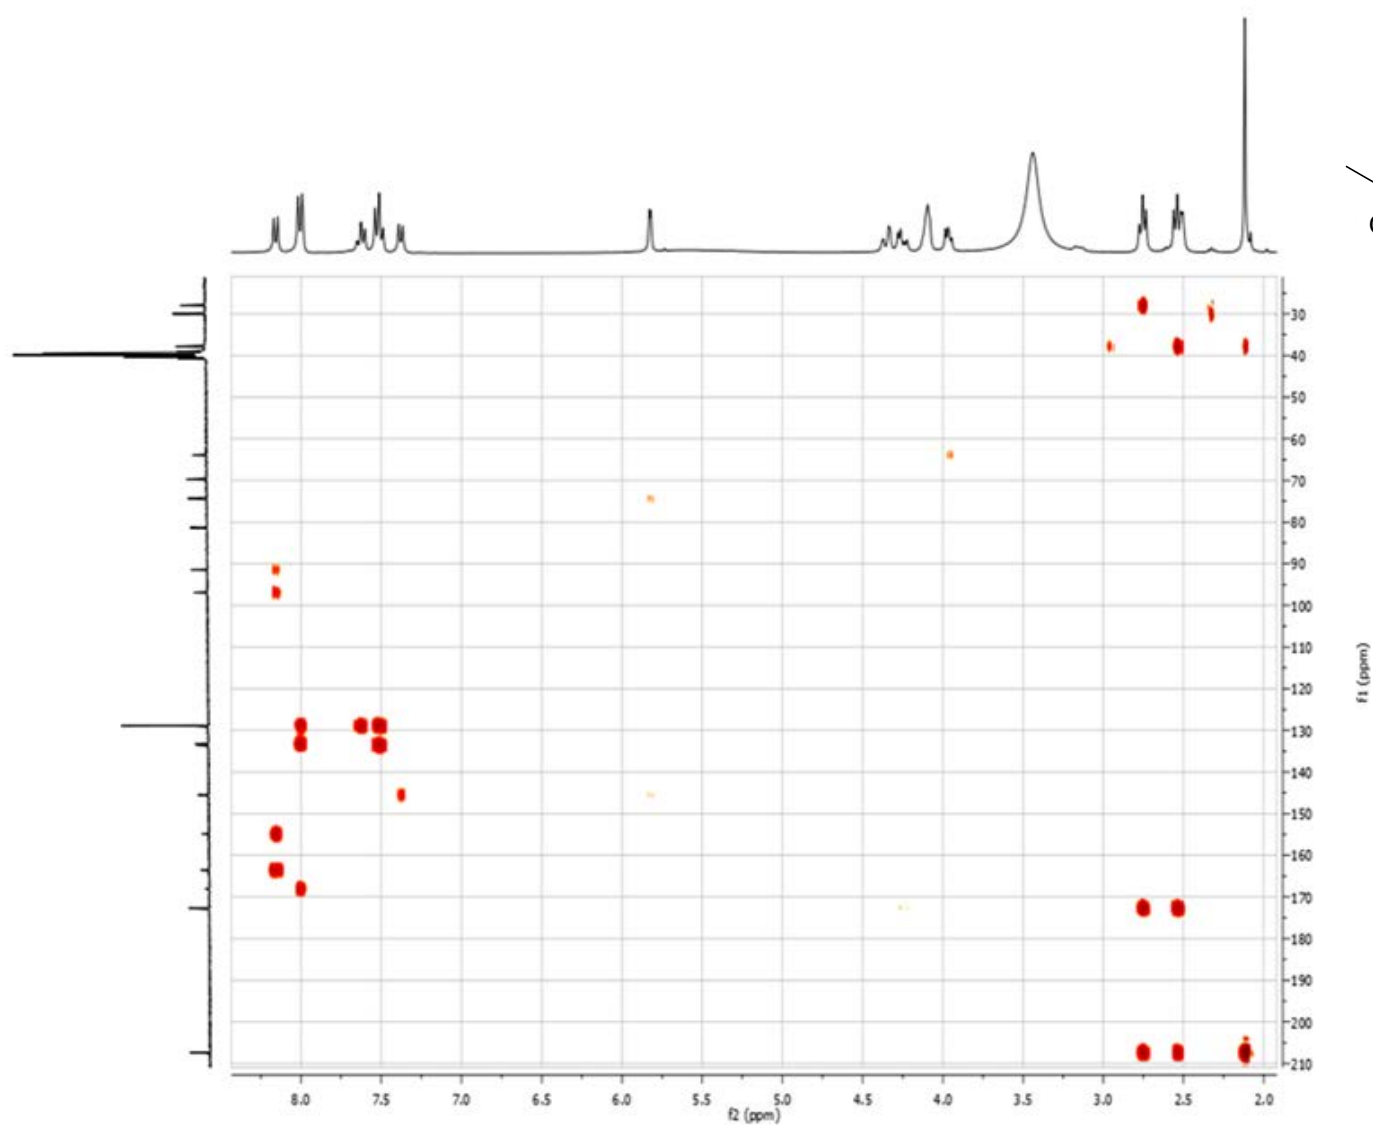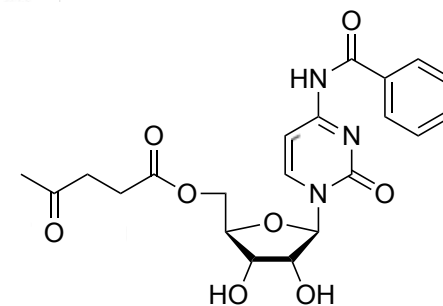

## 5'-*O*-Levulinyl- $\beta$ -D-adenosine (2e)

$^1\text{H}$ -NMR (300.13 MHz,  $\text{MeOD-}d_4$ )

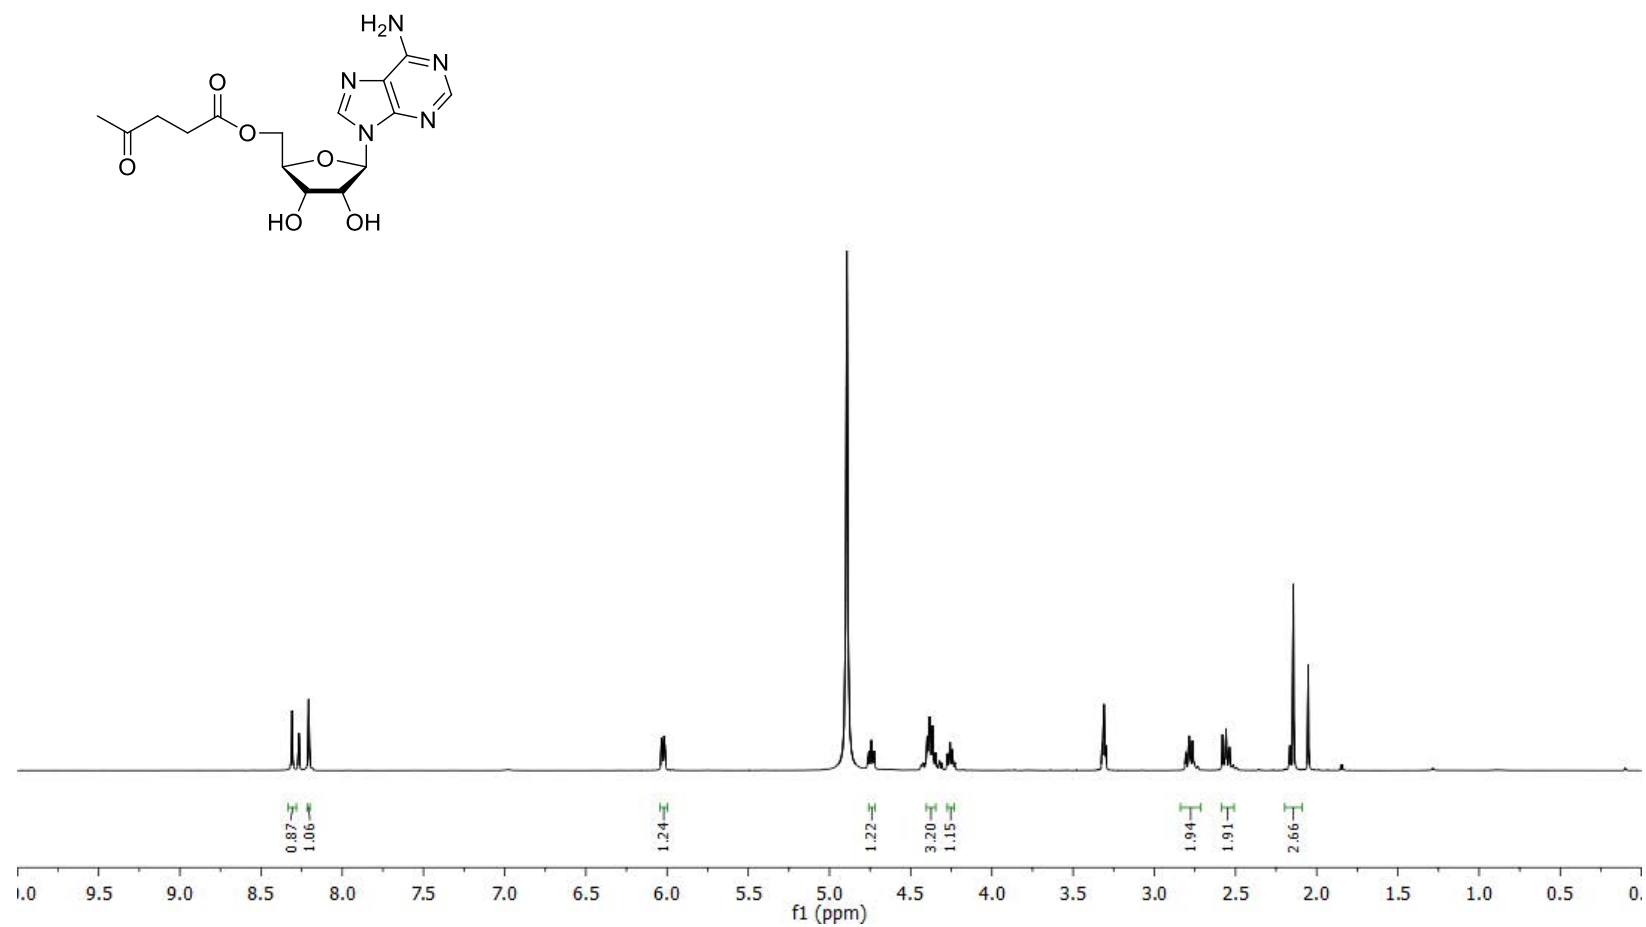

# 5'-*O*-Levulinyl- $\beta$ -D-adenosine (2e)

$^{13}\text{C}$ -NMR (75.5 MHz,  $\text{MeOD-}d_4$ )

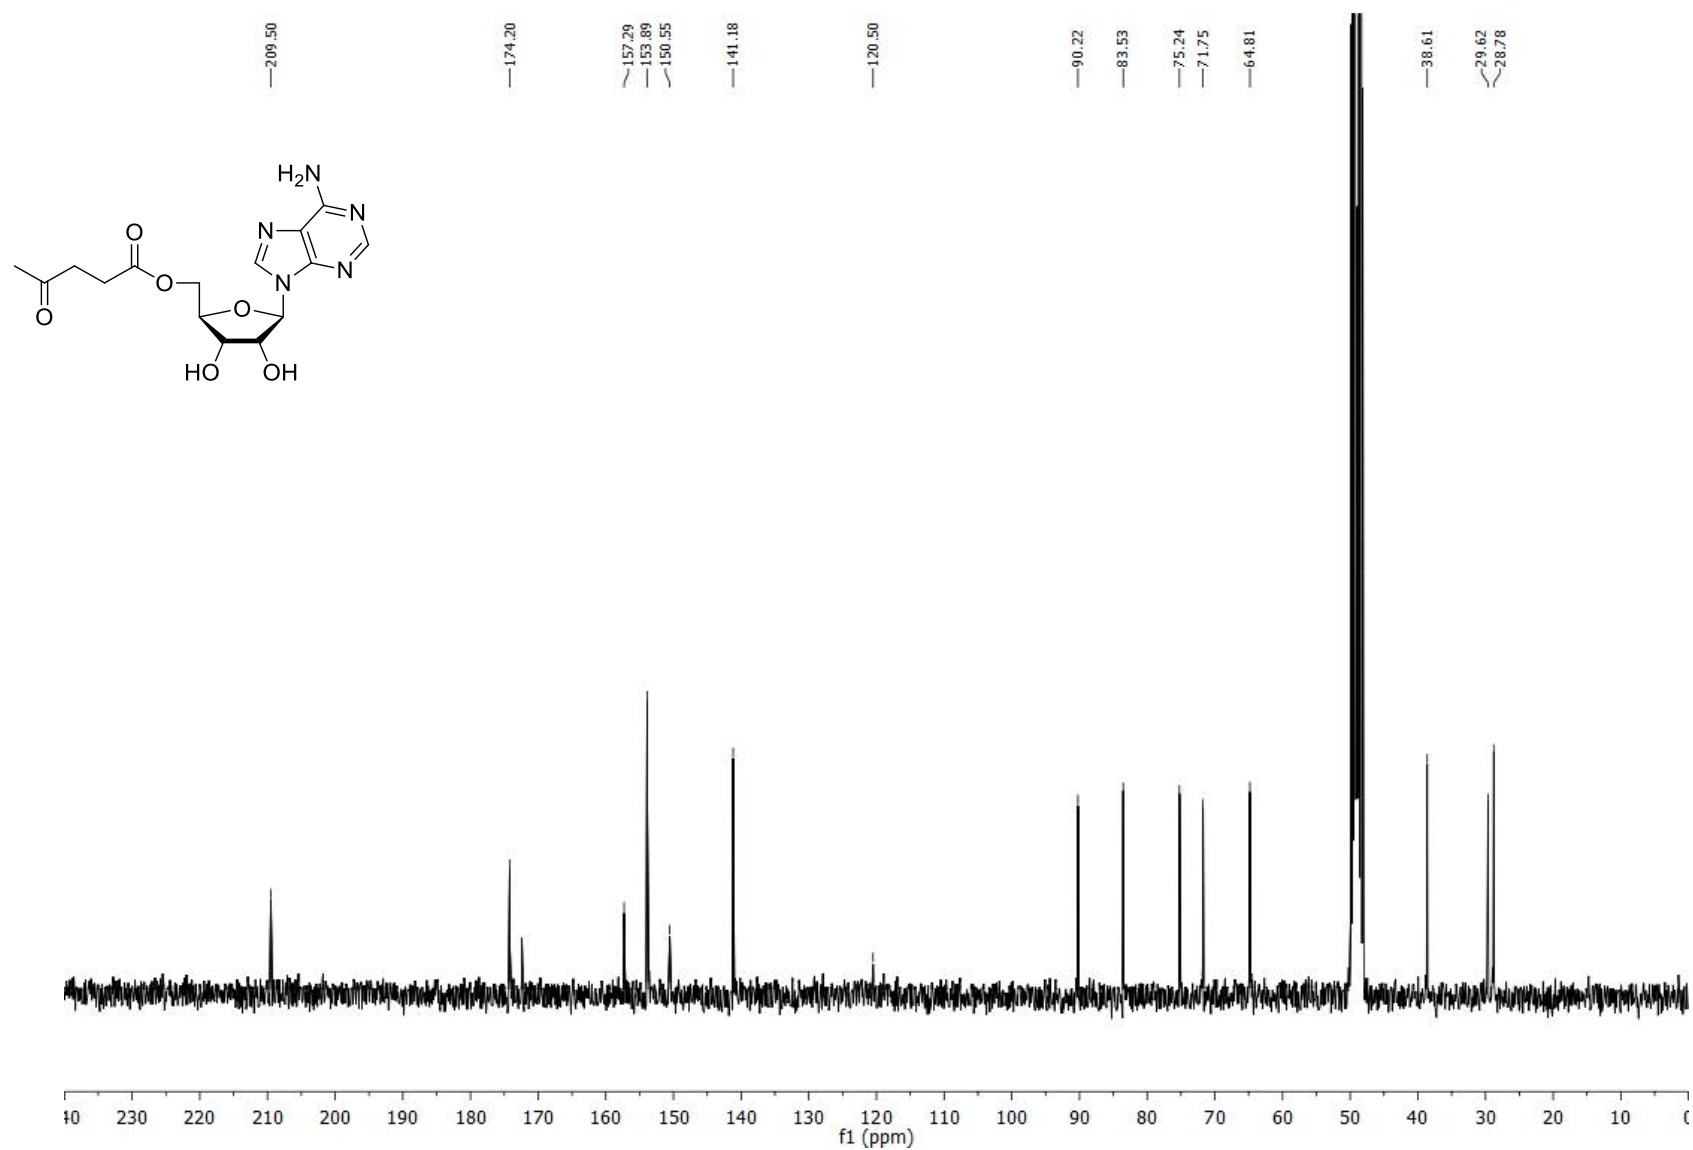

# 5'-*O*-Levulinyl- $\beta$ -D-adenosine (2e)

DEPT NMR (75.5 MHz, MeOD- $d_4$ )

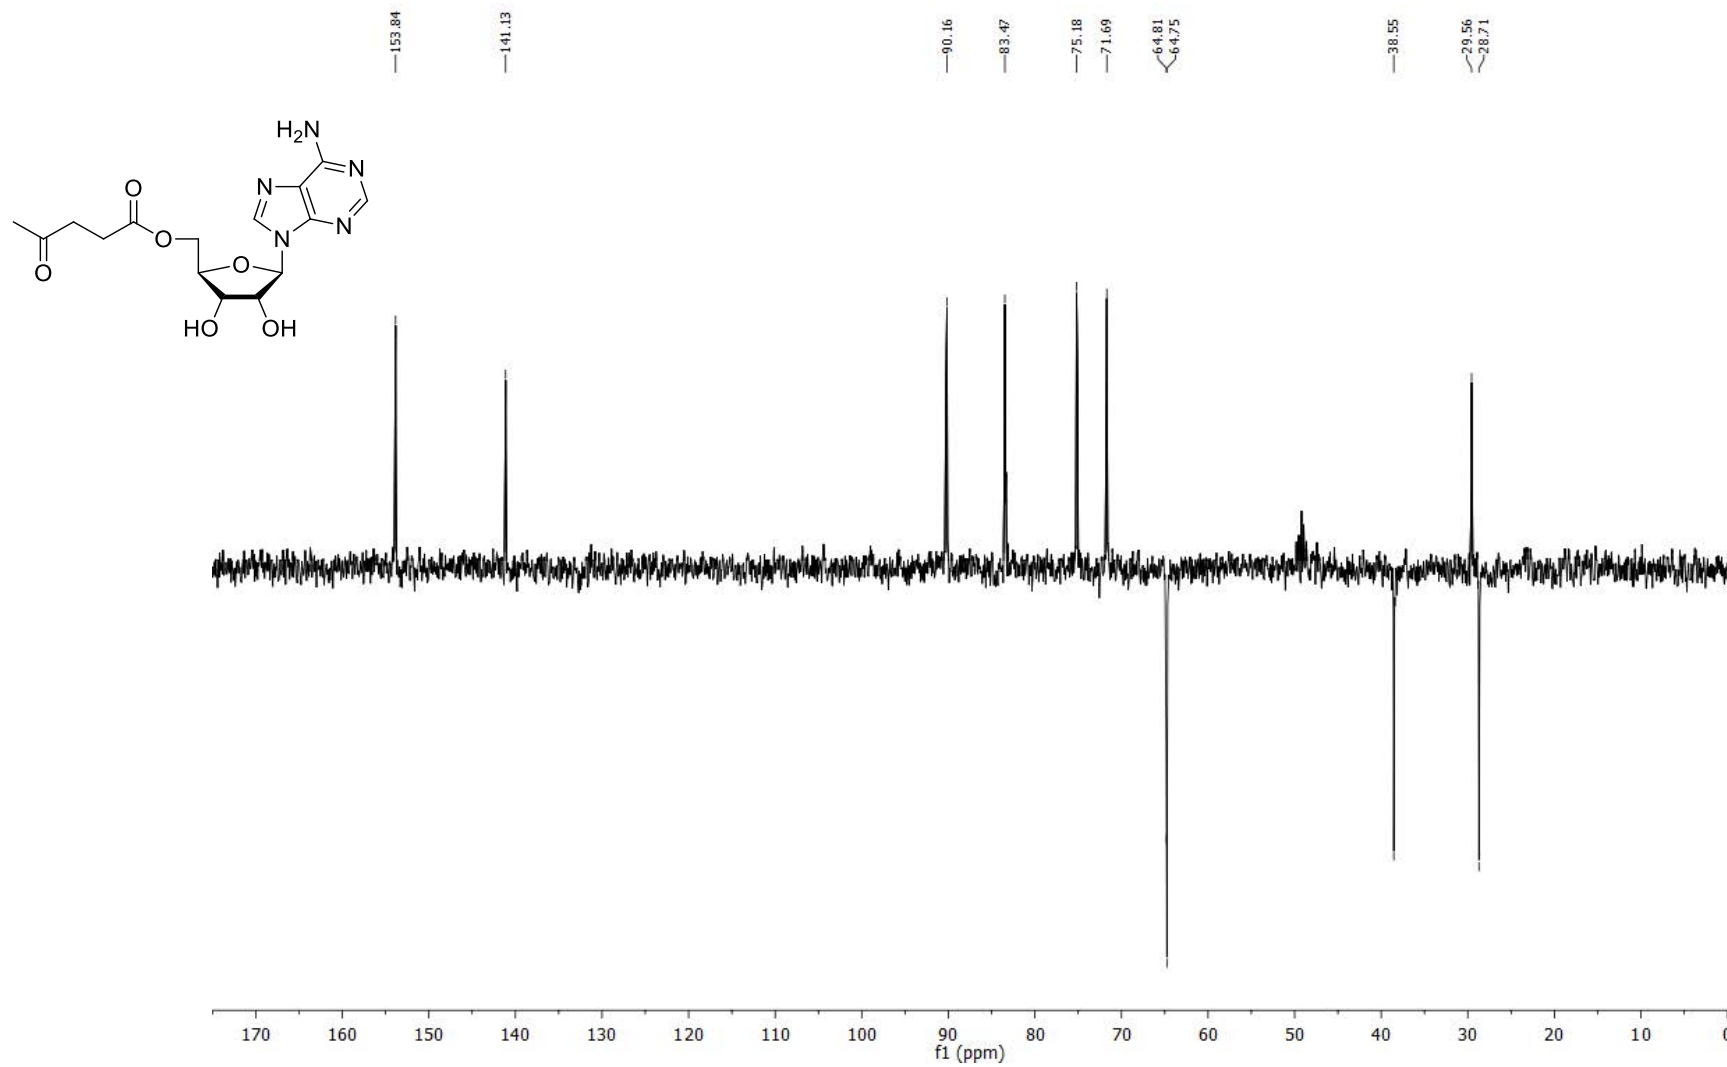

## 5'-*O*-Levulinyl- $\beta$ -D-adenosine (2e)

COSY NMR (MeOD- $d_4$ )

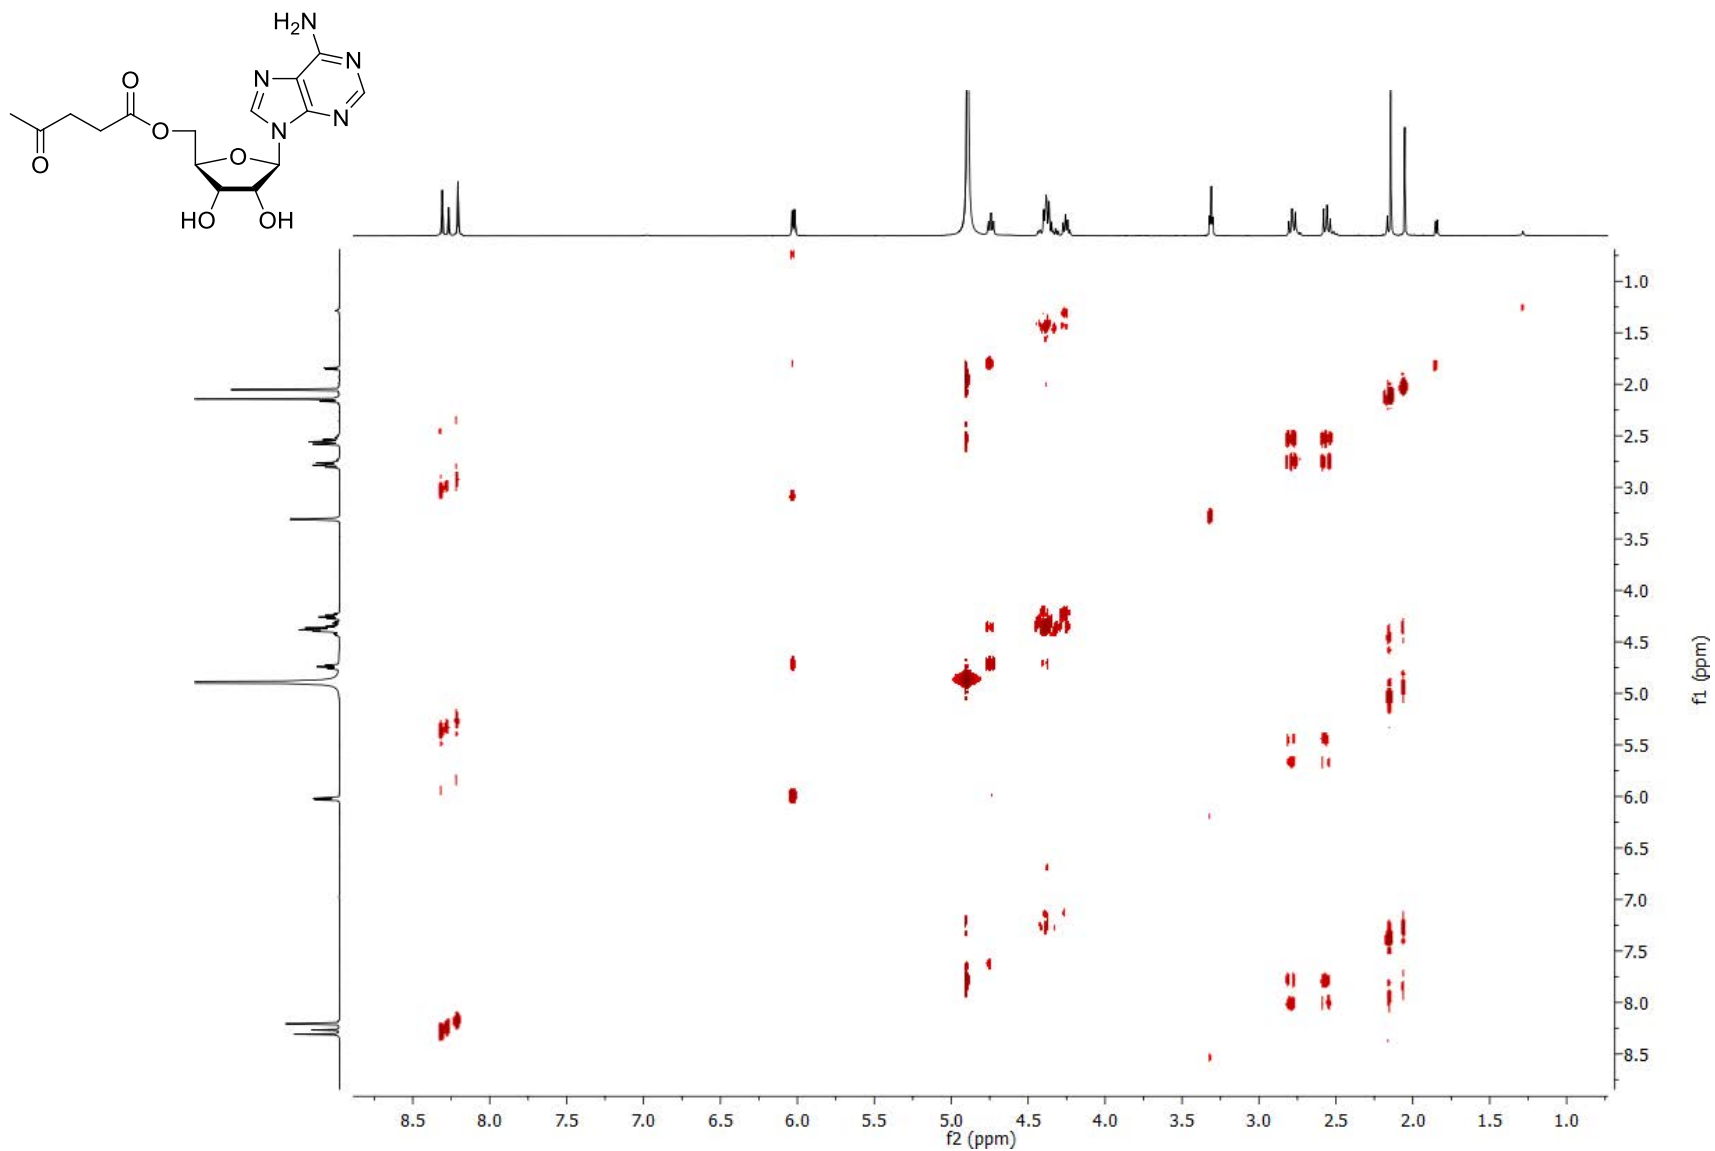



# 5'-*O*-Levulinyl- $\beta$ -D-adenosine (2e)

HSQC NMR (MeOD- $d_4$ )

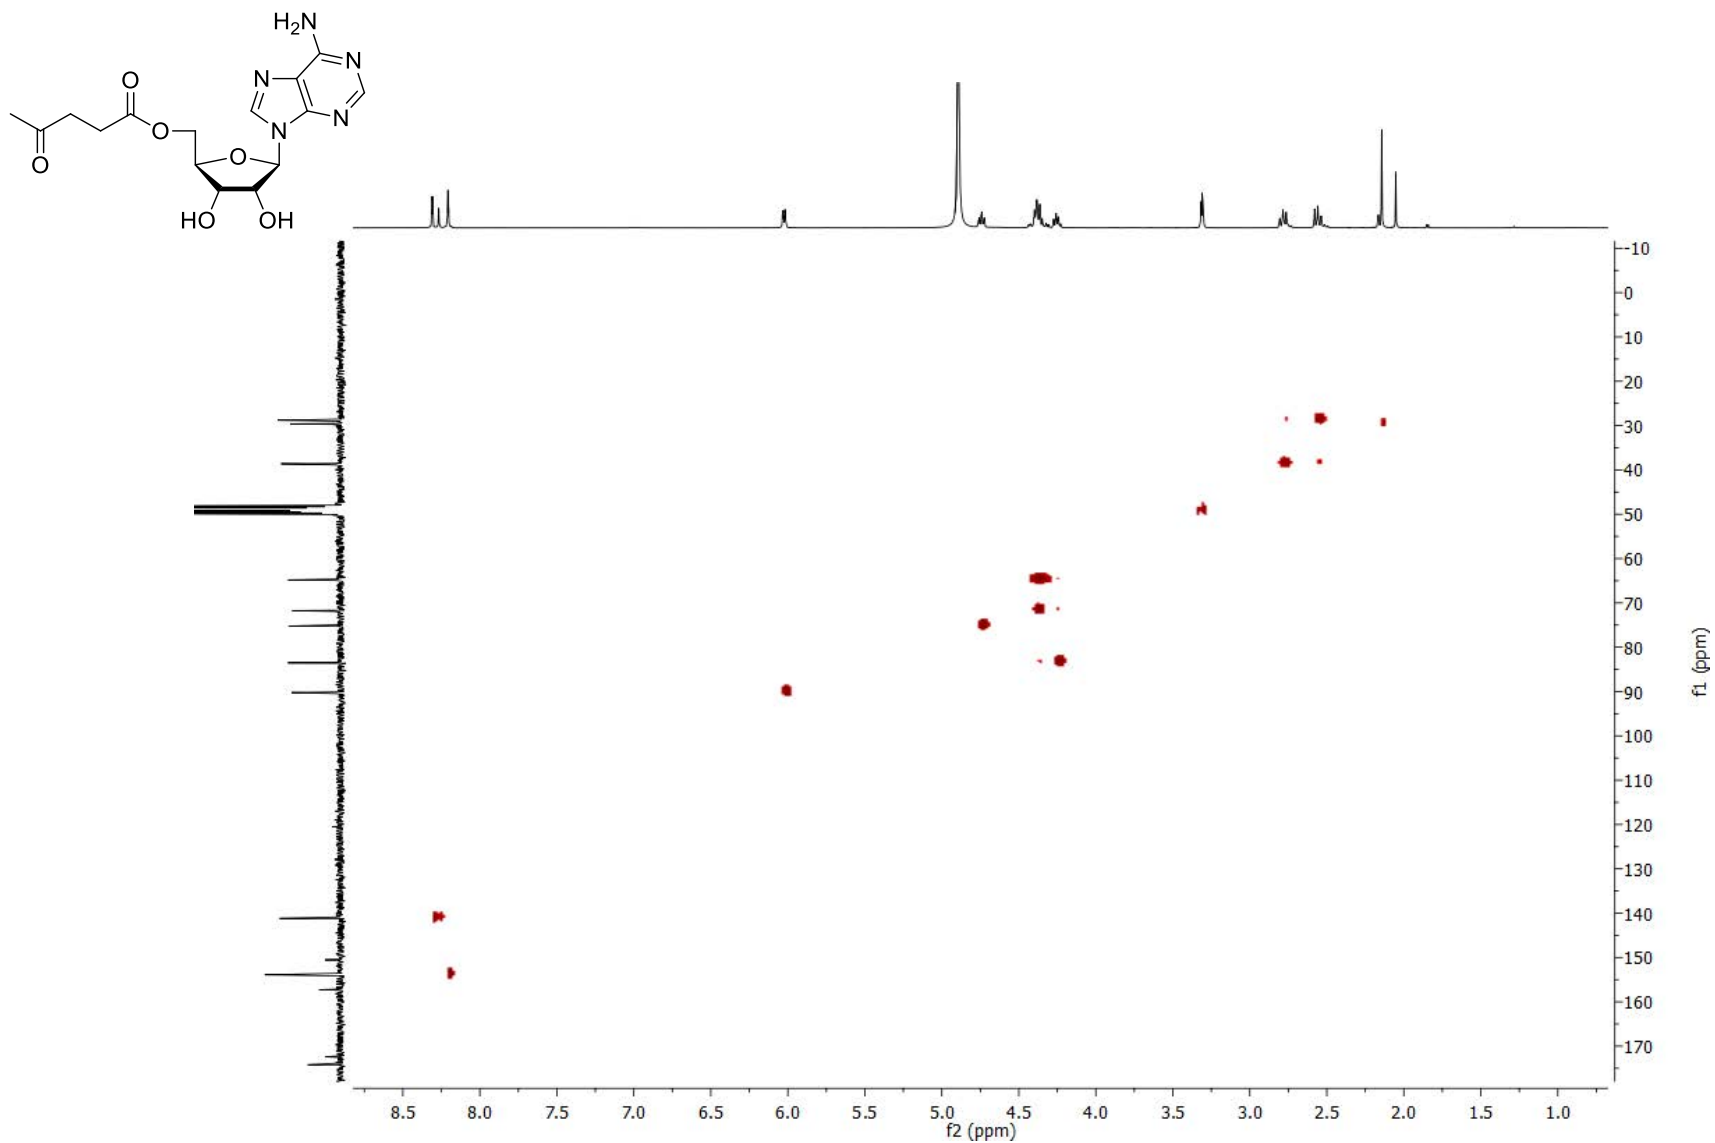

# 5'-*O*-Levulinyl- $\beta$ -D-adenosine (2e)

HMBC NMR (MeOD- $d_4$ )

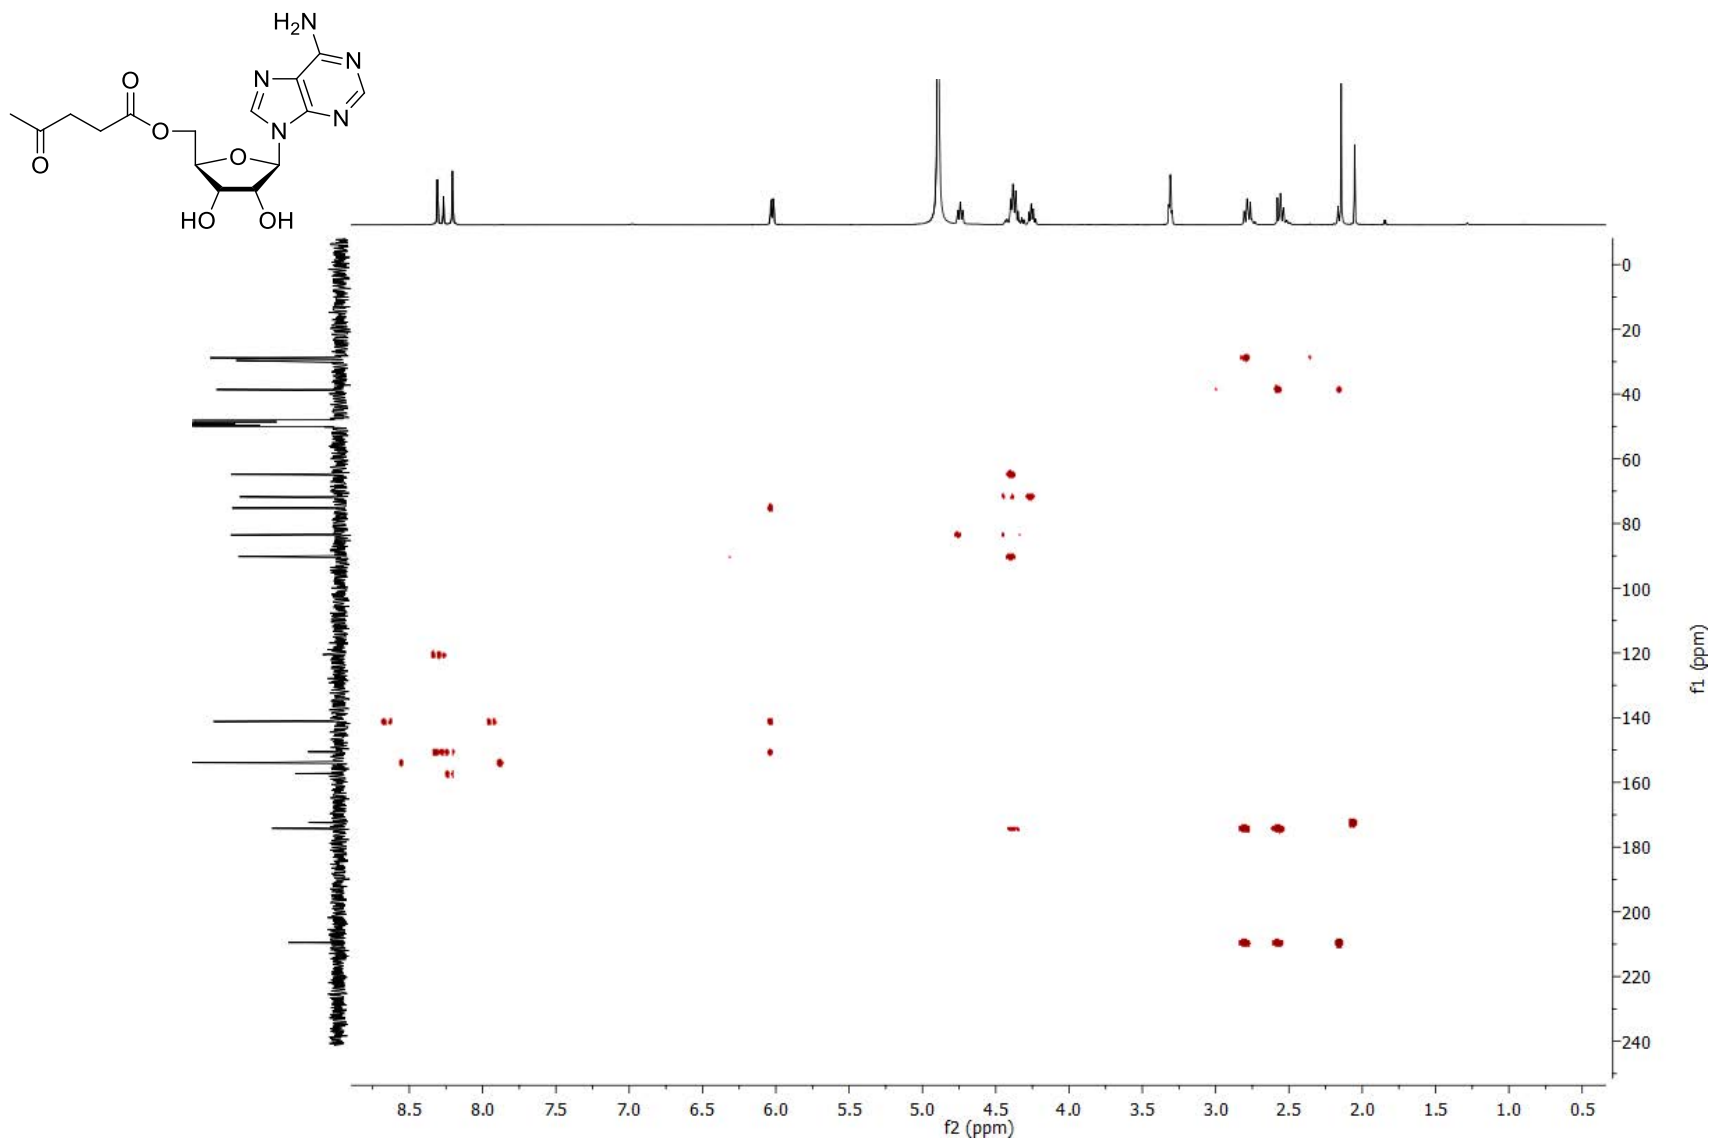

5'-*O*-Levulinyl- $\beta$ -D-inosine (2f)

$^1\text{H}$ -NMR (300.13 MHz,  $\text{MeOD-}d_4$ )

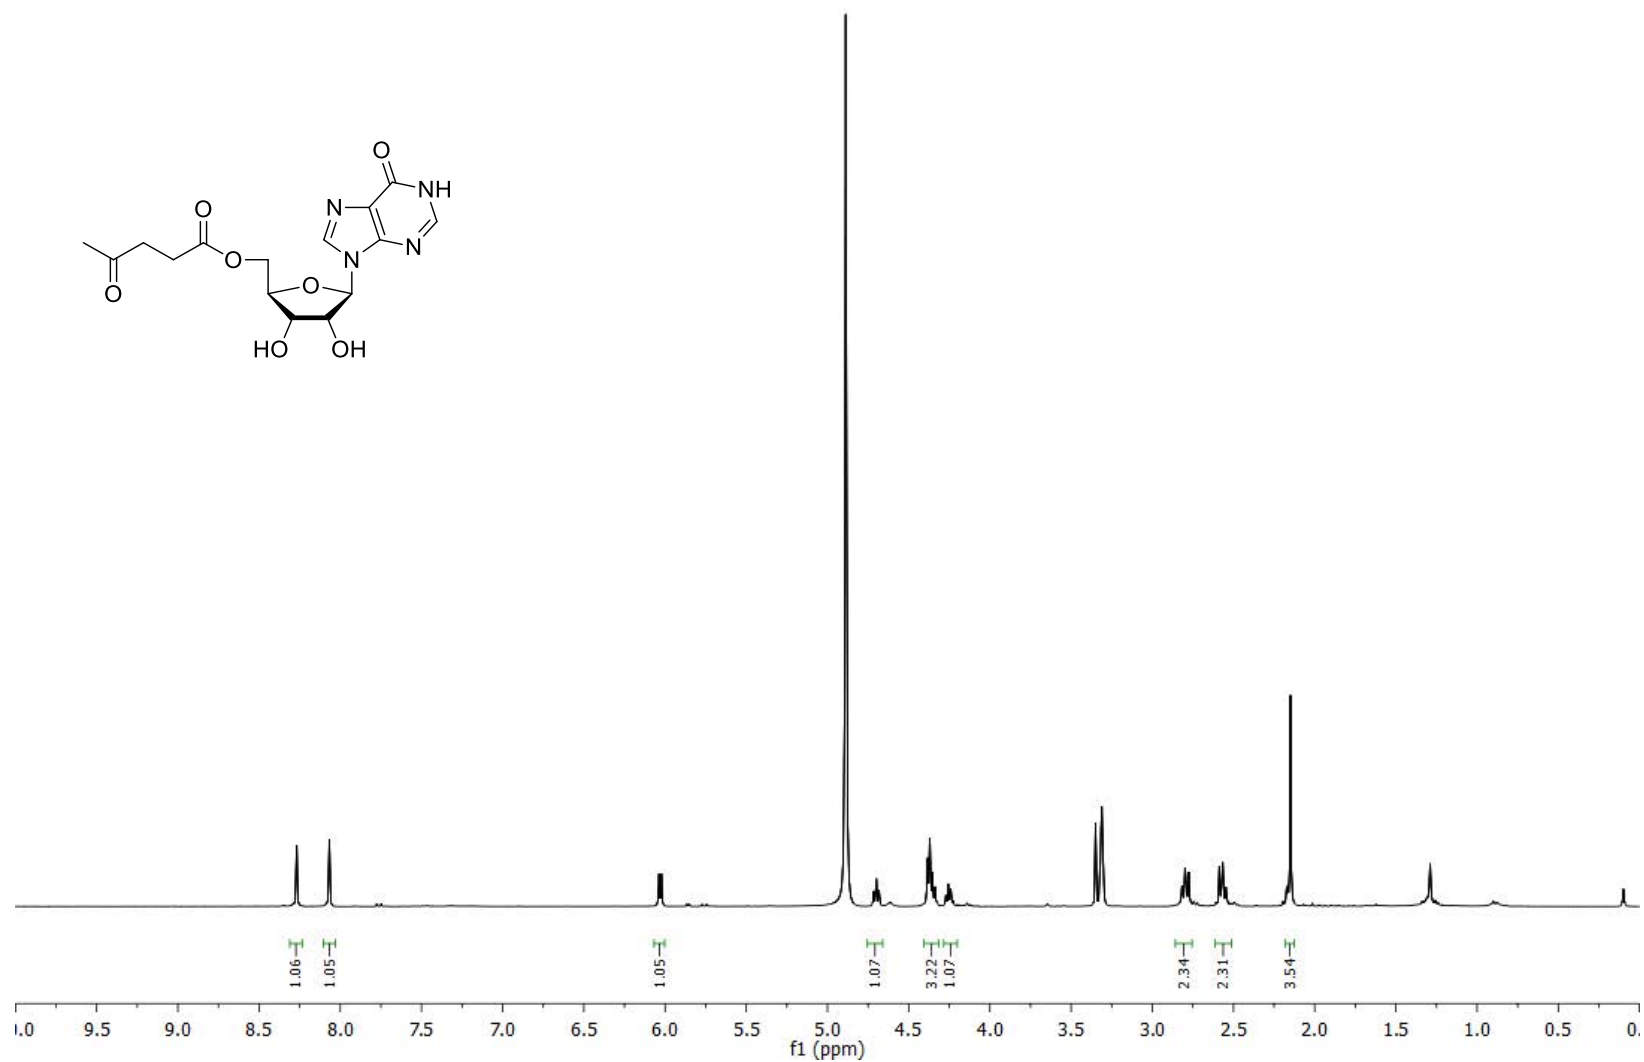

### 5'-*O*-Levulinyl- $\beta$ -D-inosine (2f)

$^{13}\text{C}$ -NMR (75.5 MHz,  $\text{MeOD-}d_4$ )

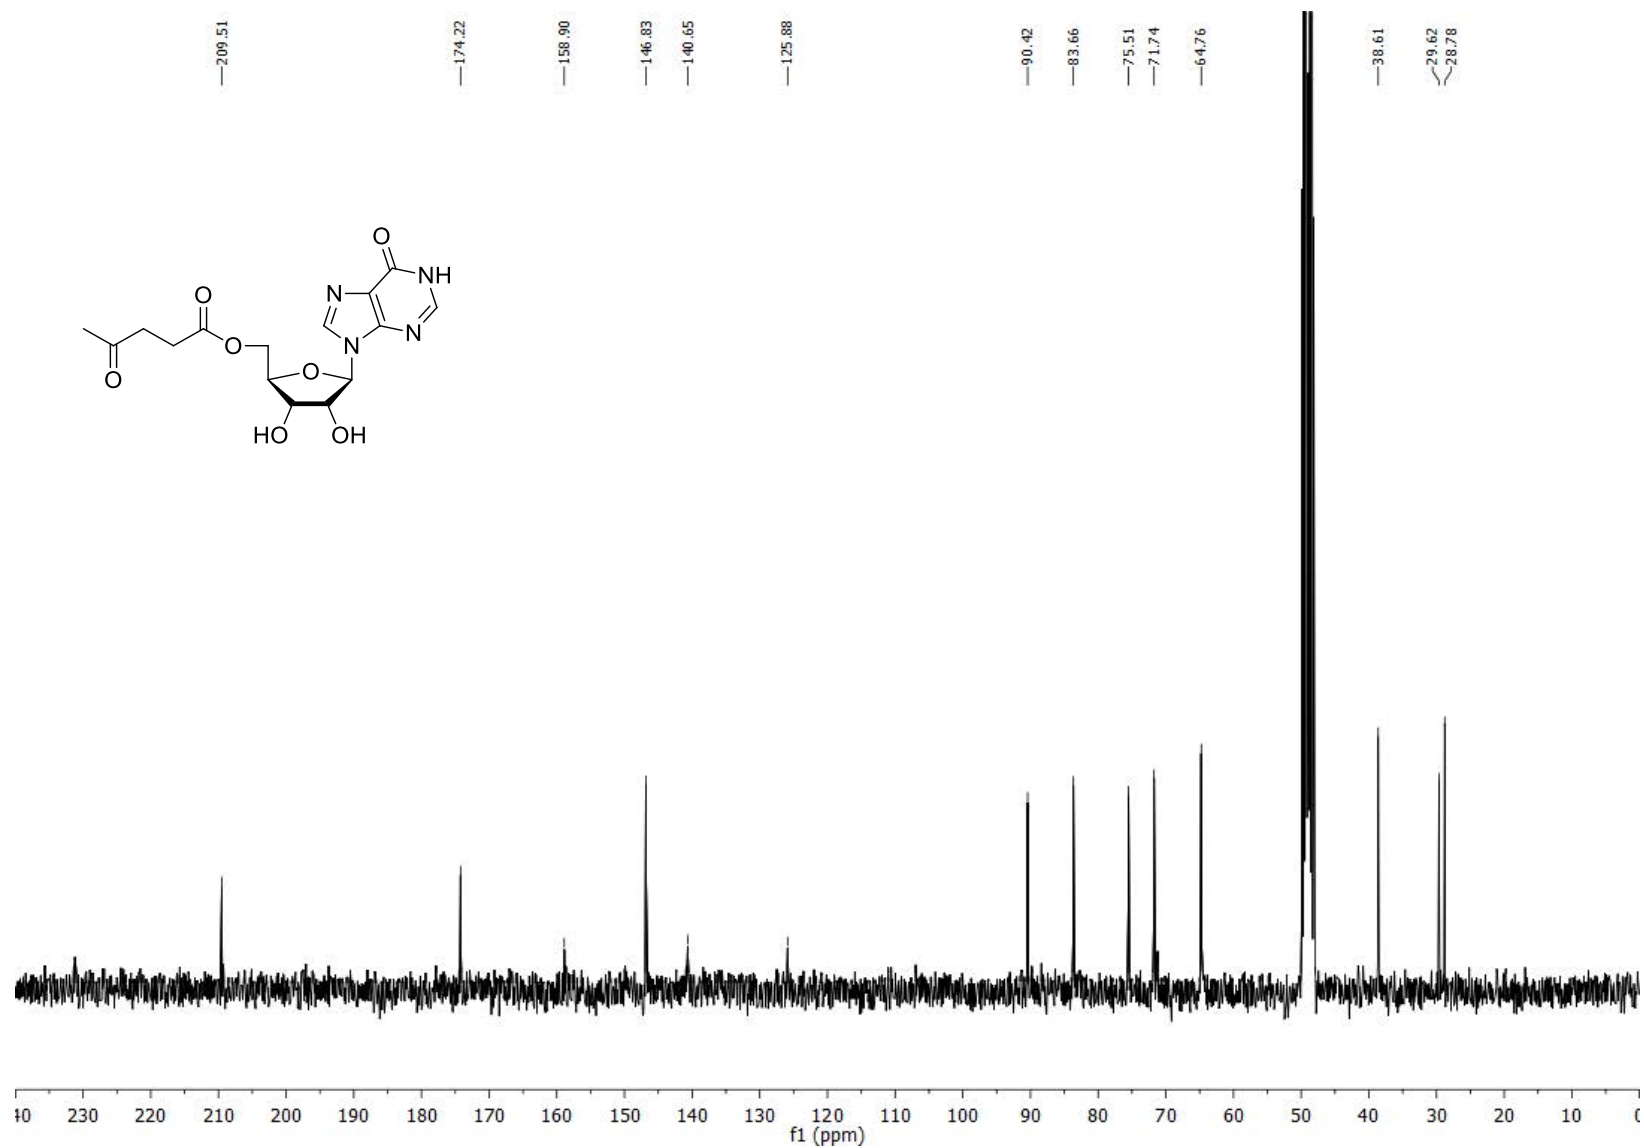

# 5'-*O*-Levulinyl- $\beta$ -D-inosine (2f)

DEPT NMR (75.5 MHz, MeOD- $d_4$ )

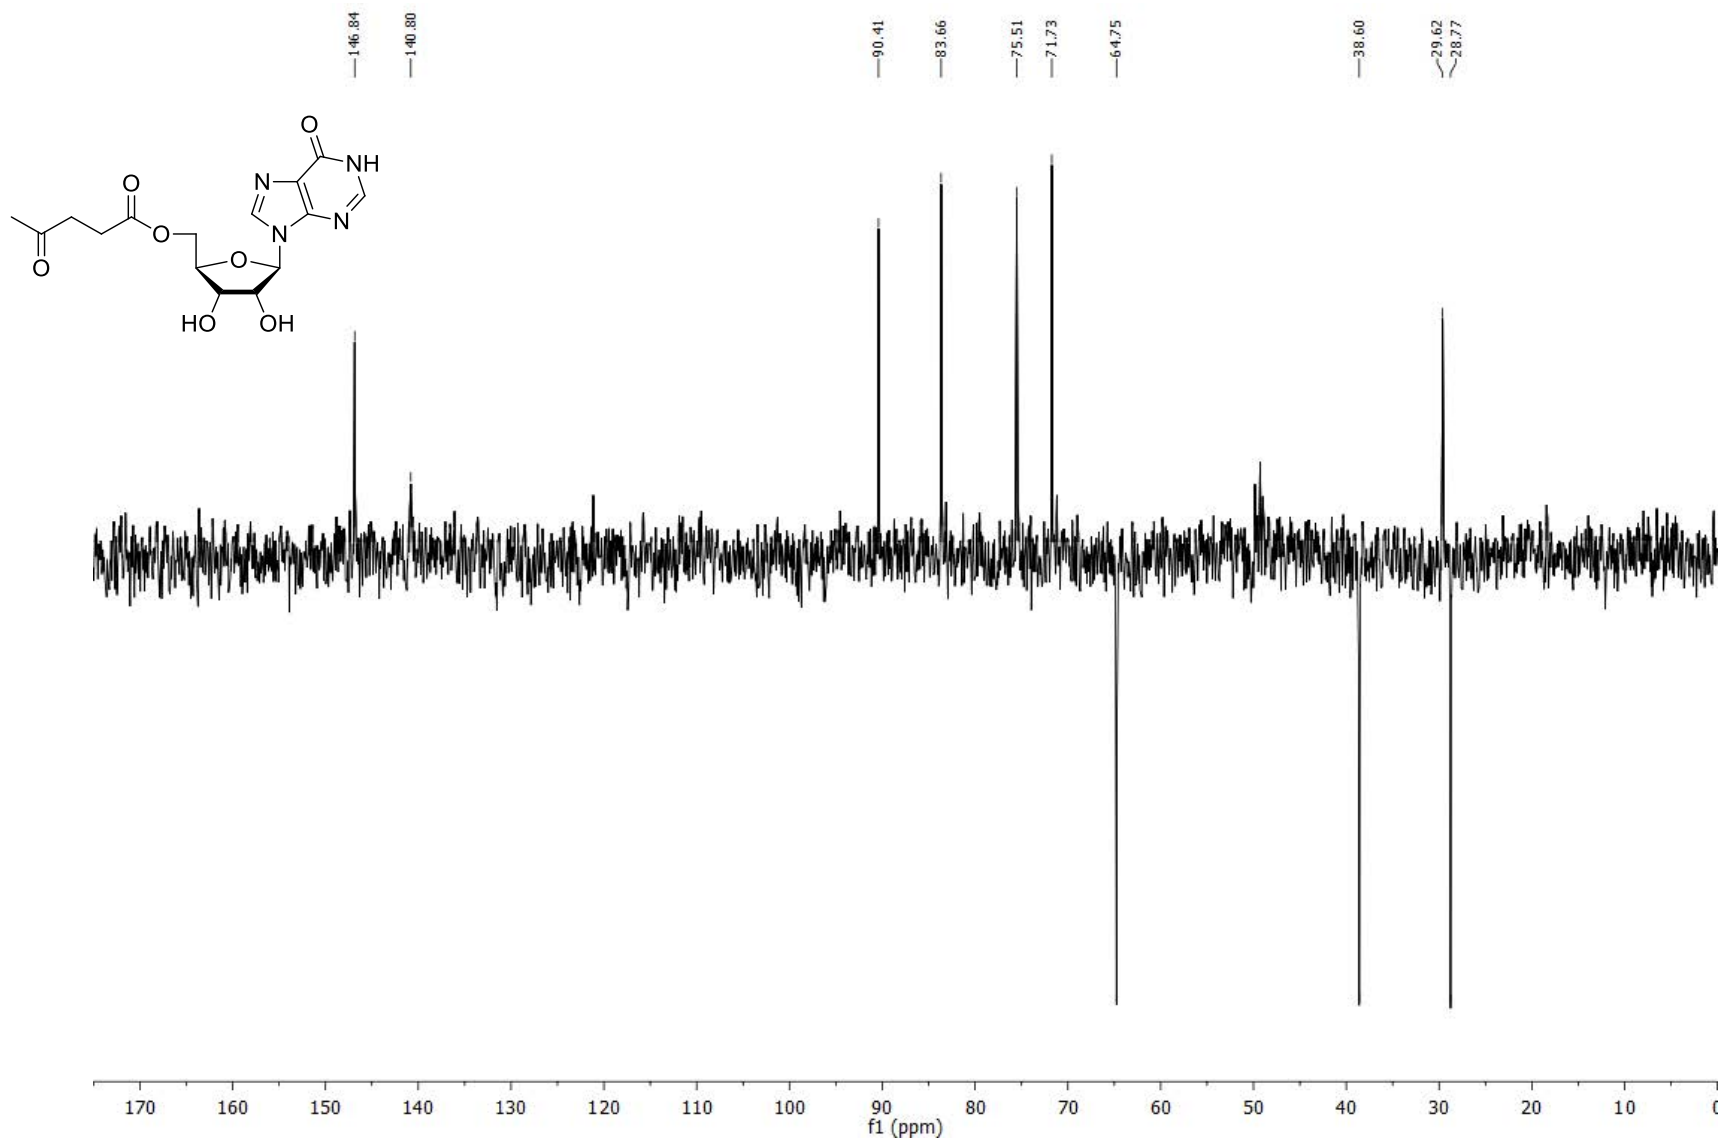

5'-*O*-Levulinyl- $\beta$ -D-inosine (2f)

COSY NMR (MeOD- $d_4$ )

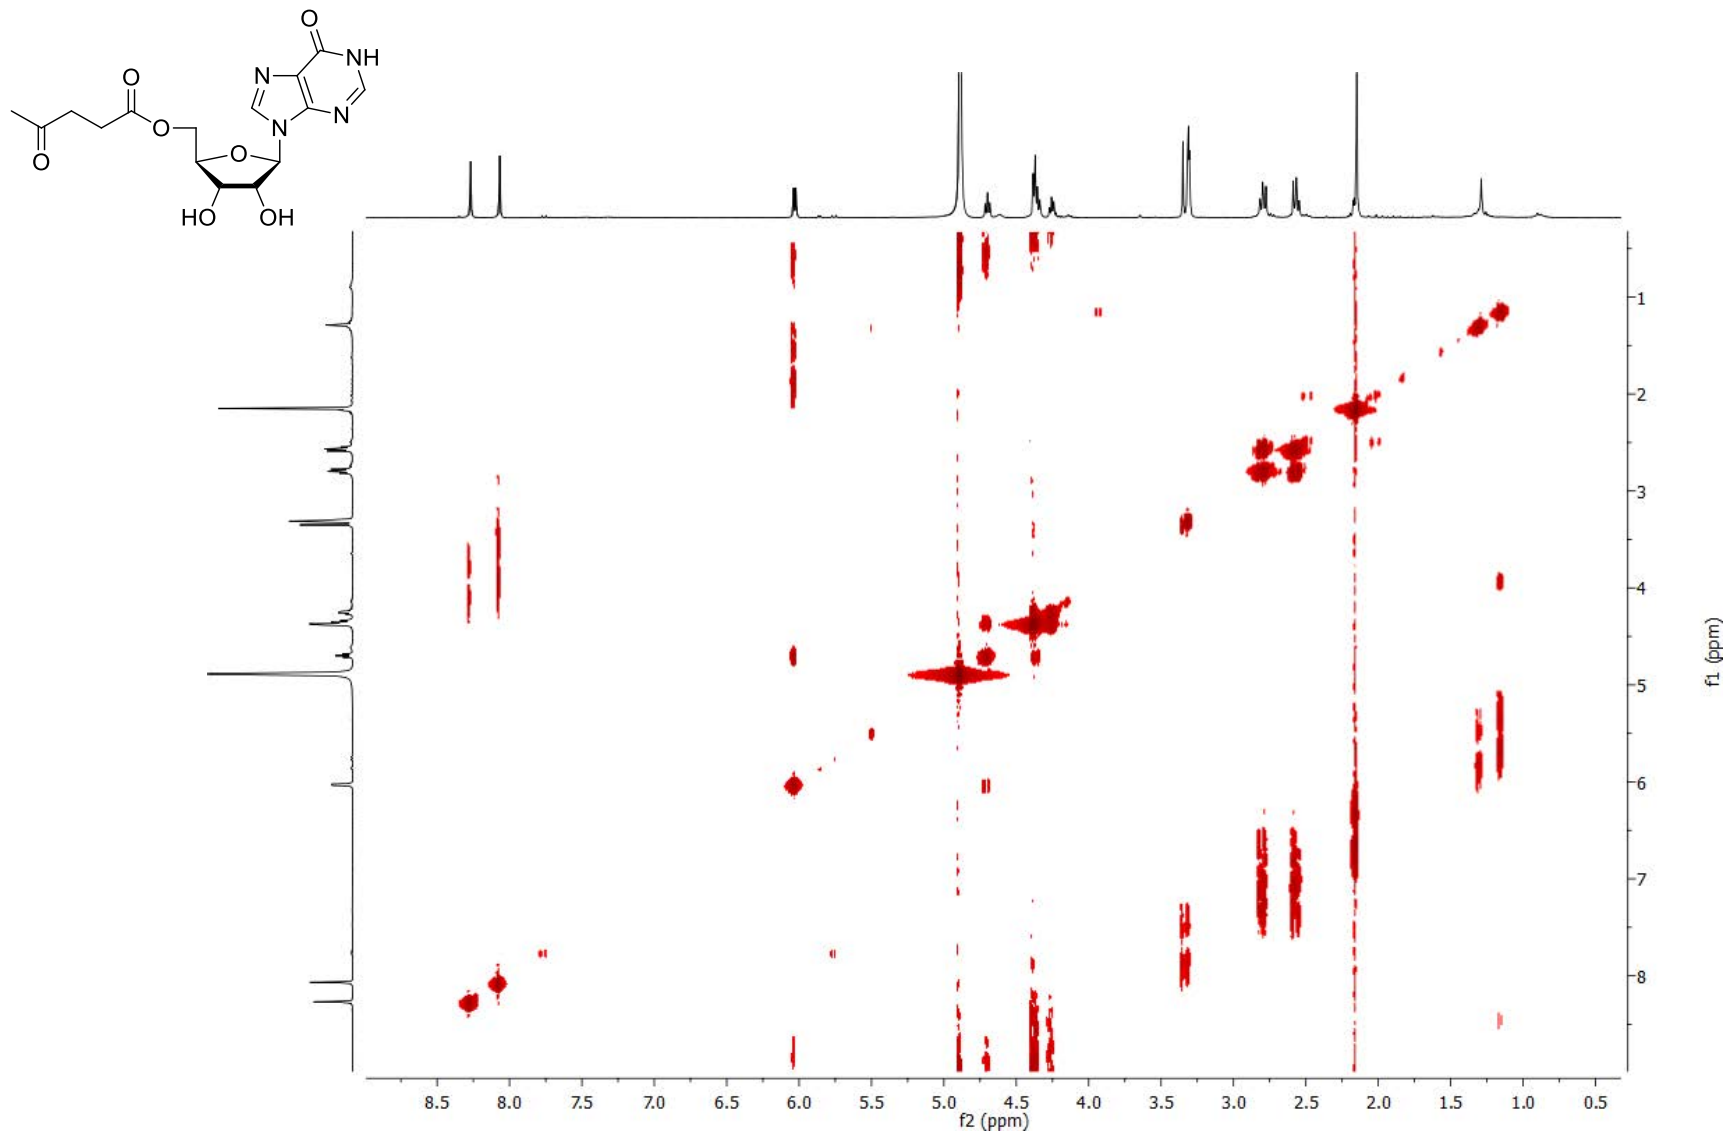

5'-*O*-Levulinyl- $\beta$ -D-inosine (2f)

HSQC NMR (MeOD- $d_4$ )

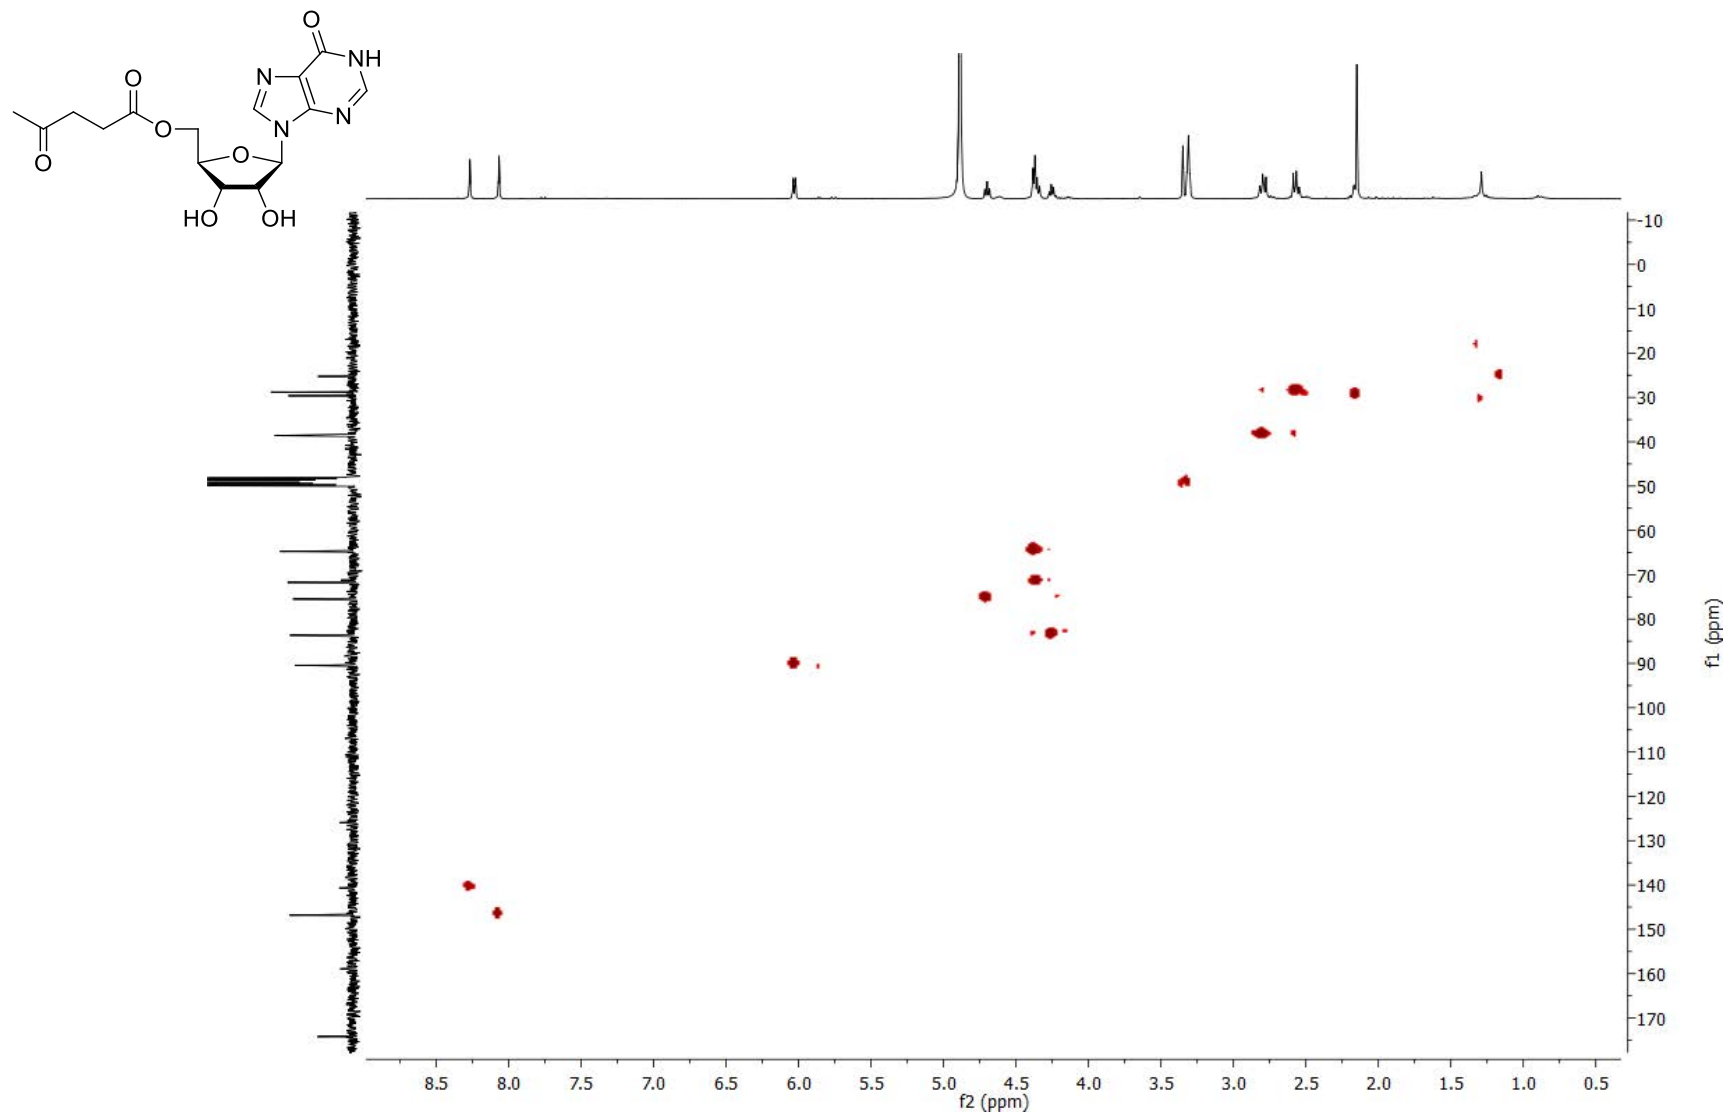

5'-*O*-Levulinyl- $\beta$ -D-inosine (2f)

HMBC NMR (MeOD- $d_4$ )

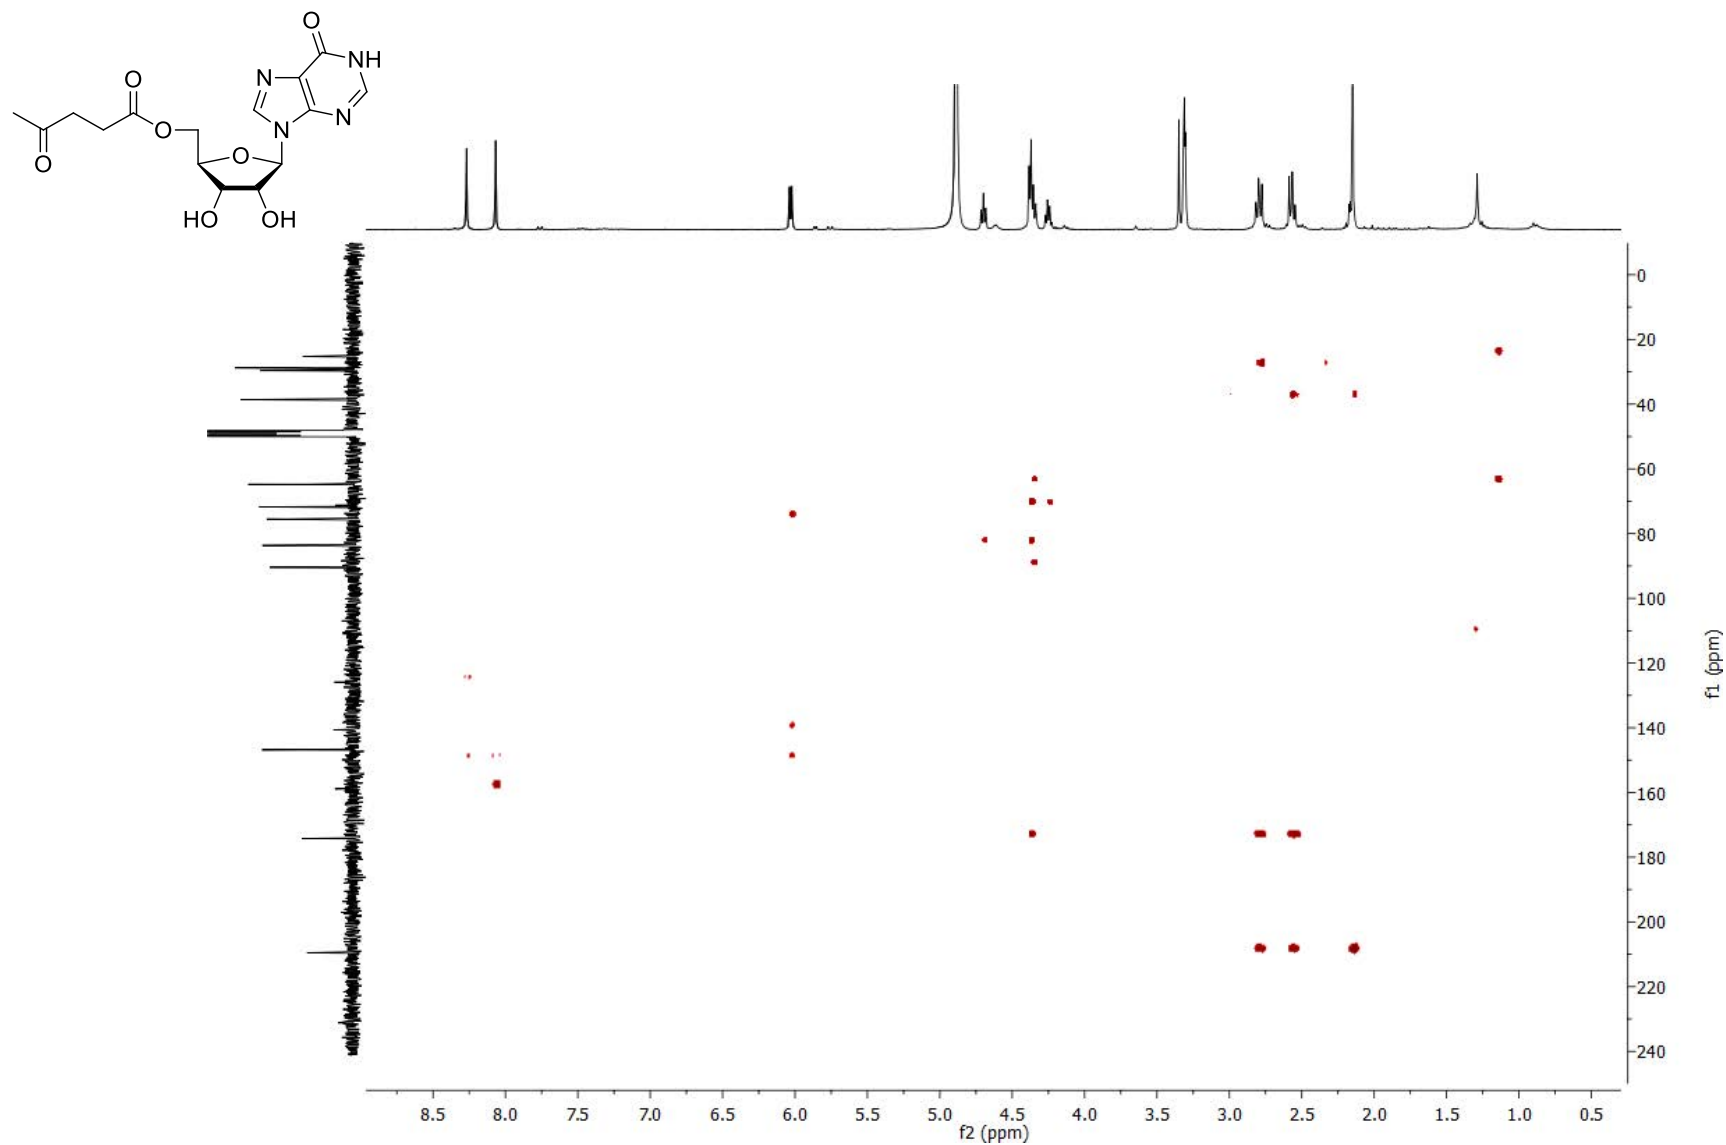



**5'-O-(*tert*-Butyldimethylsilyl)- $\beta$ -D-uridine (5a)**

$^1\text{H}$ -NMR (300.13 MHz,  $\text{CDCl}_3$ )

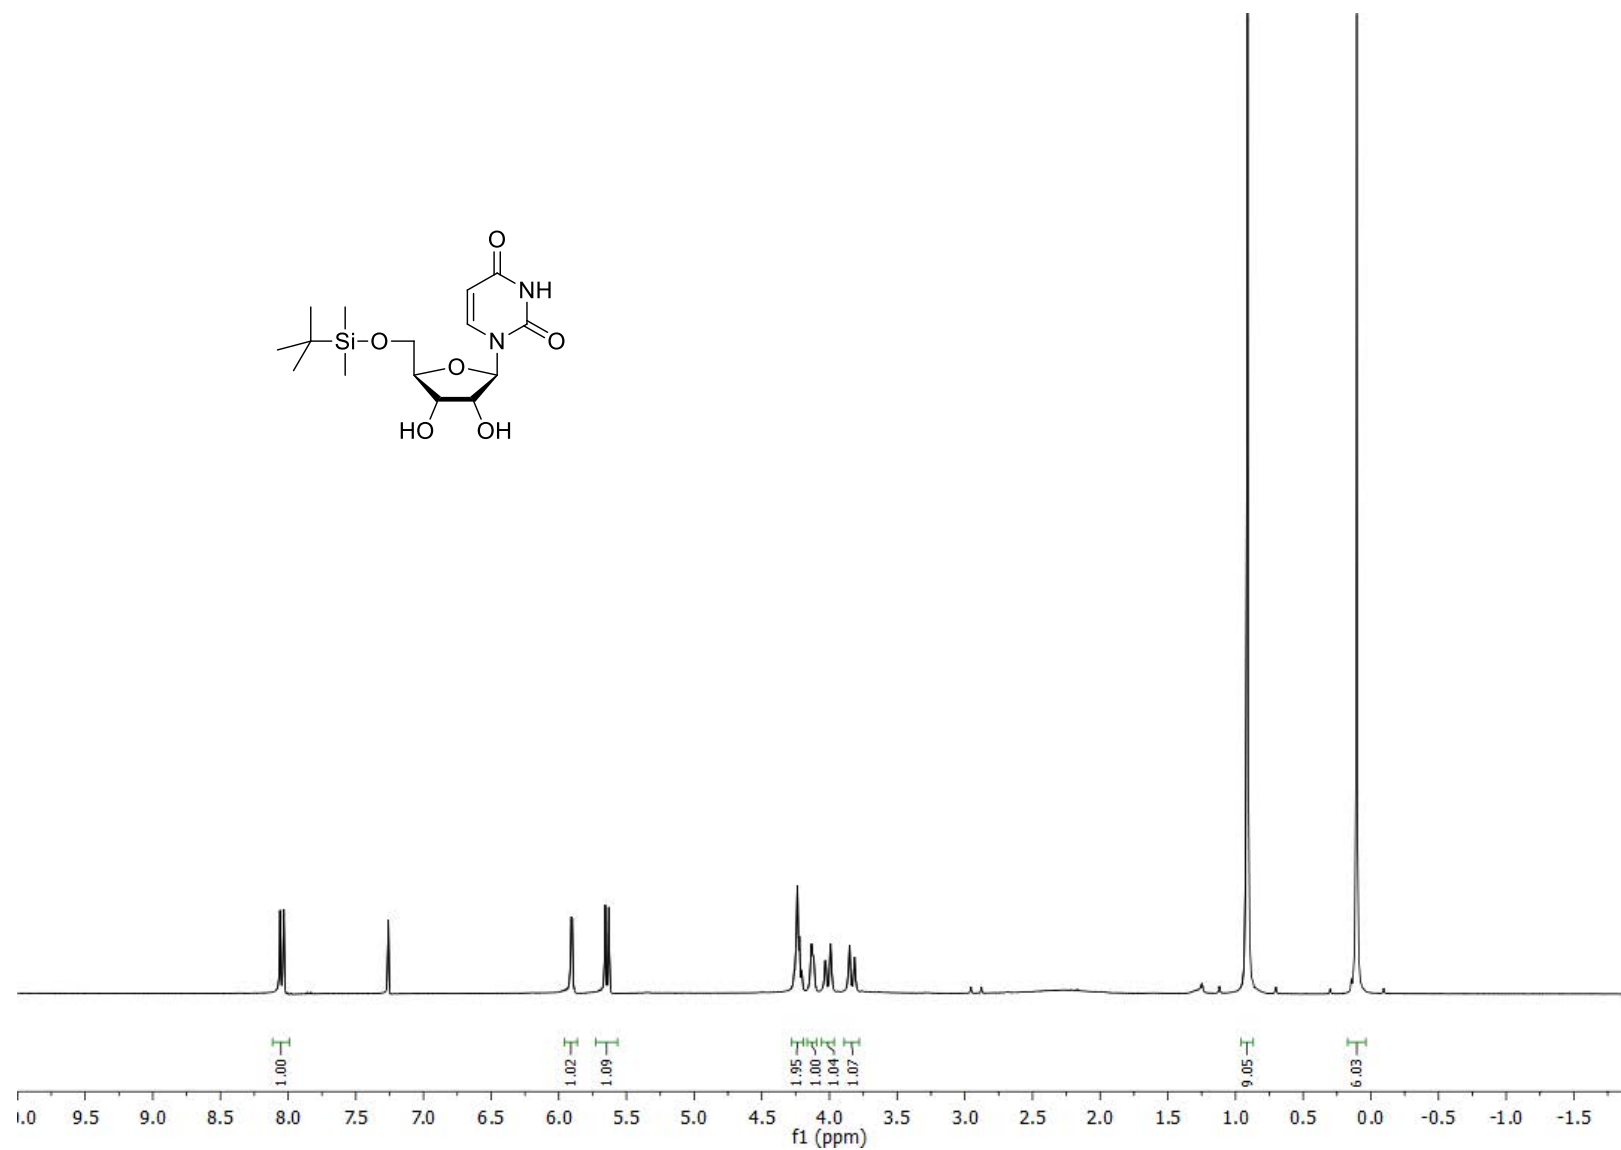

**5'-O-(*tert*-Butyldimethylsilyl)- $\beta$ -D-uridine (5a)**

$^{13}\text{C}$ -NMR (300.13 MHz,  $\text{CDCl}_3$ )

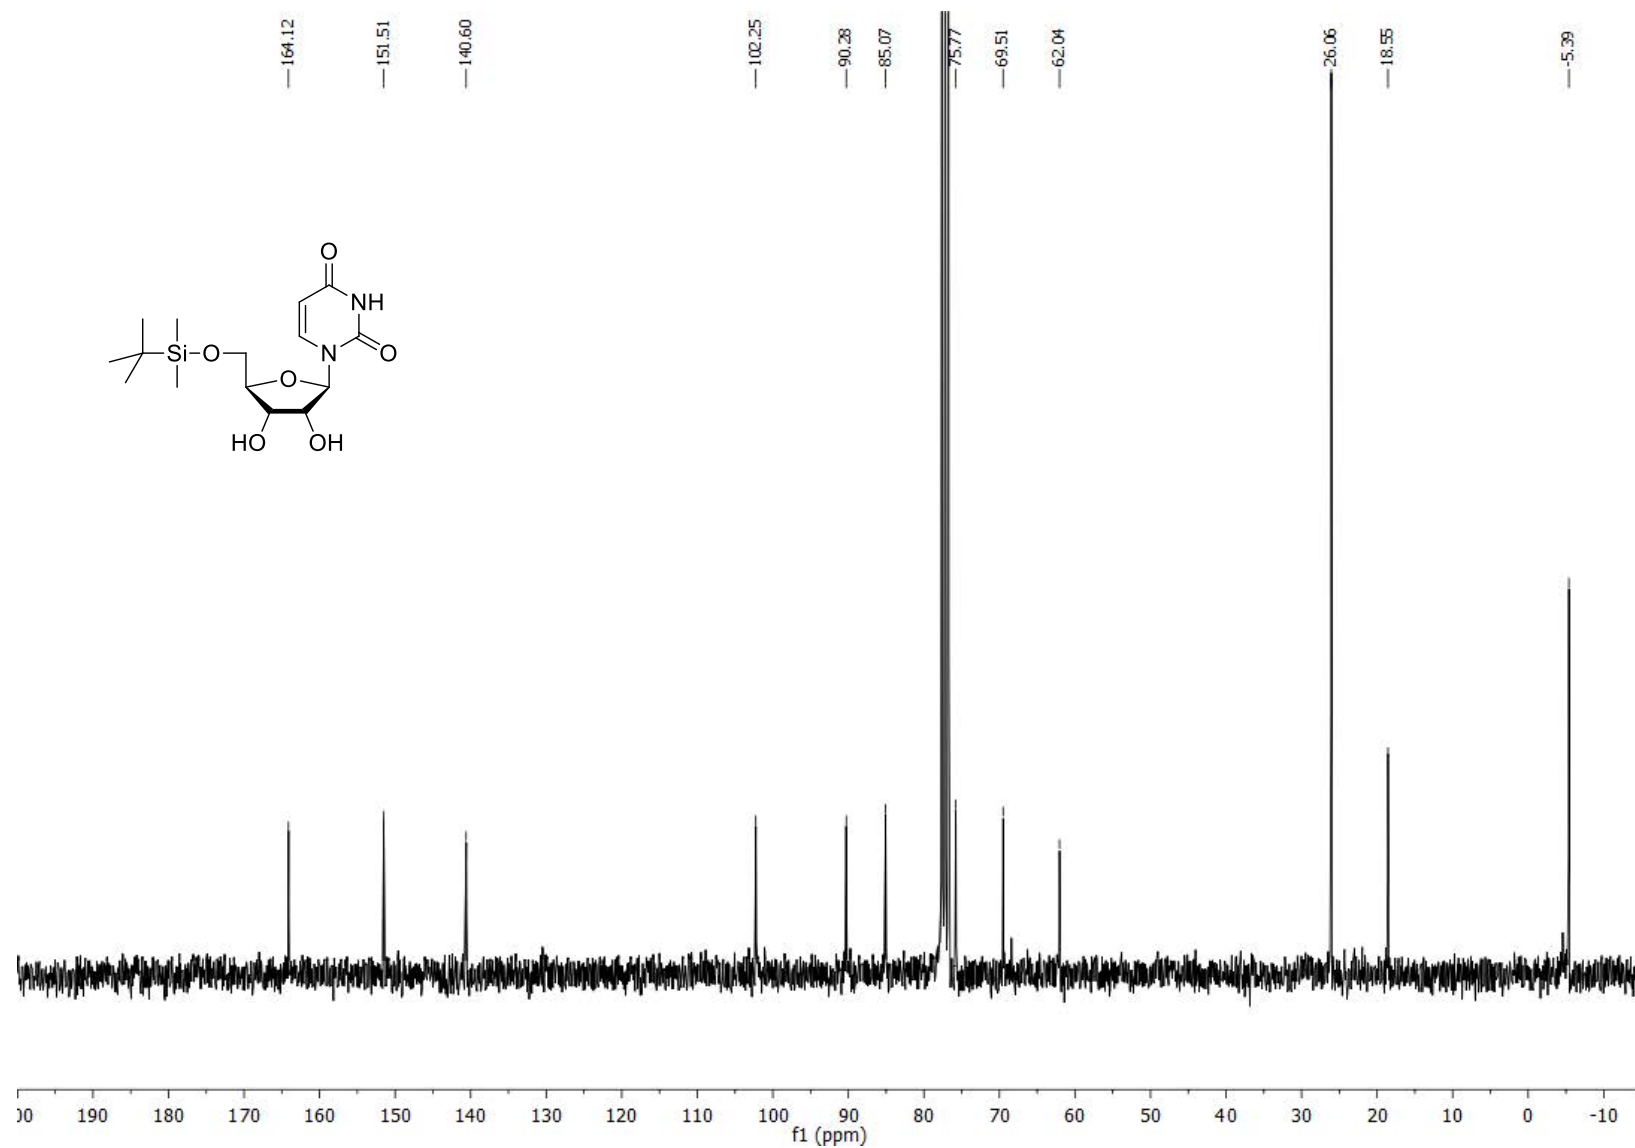

**5'-O-(*tert*-Butyldimethylsilyl)- $\beta$ -D-5-methyluridine (5b)**

$^1\text{H-NMR}$  (300.13 MHz,  $\text{CDCl}_3$ )

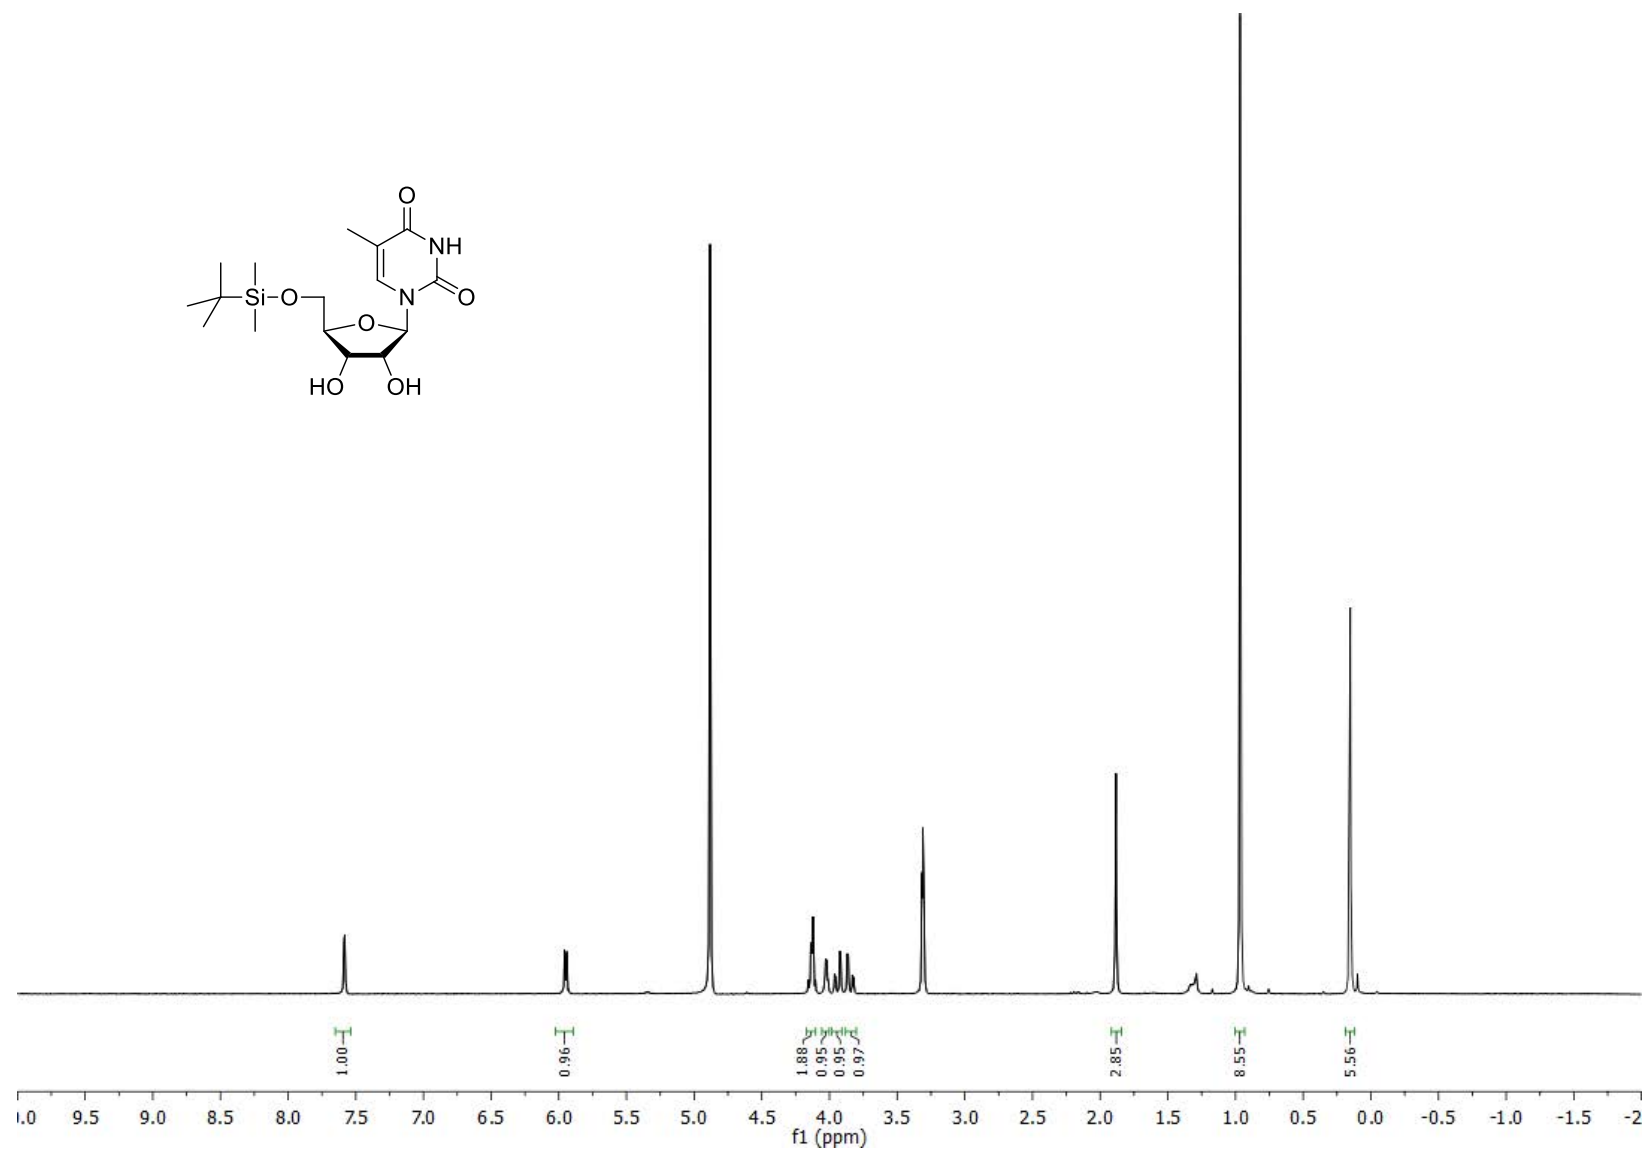

S43

**5'-O-(*tert*-Butyldimethylsilyl)- $\beta$ -D-5-methyluridine (5b)**

$^{13}\text{C}$ -NMR (75.5 MHz,  $\text{CDCl}_3$ )

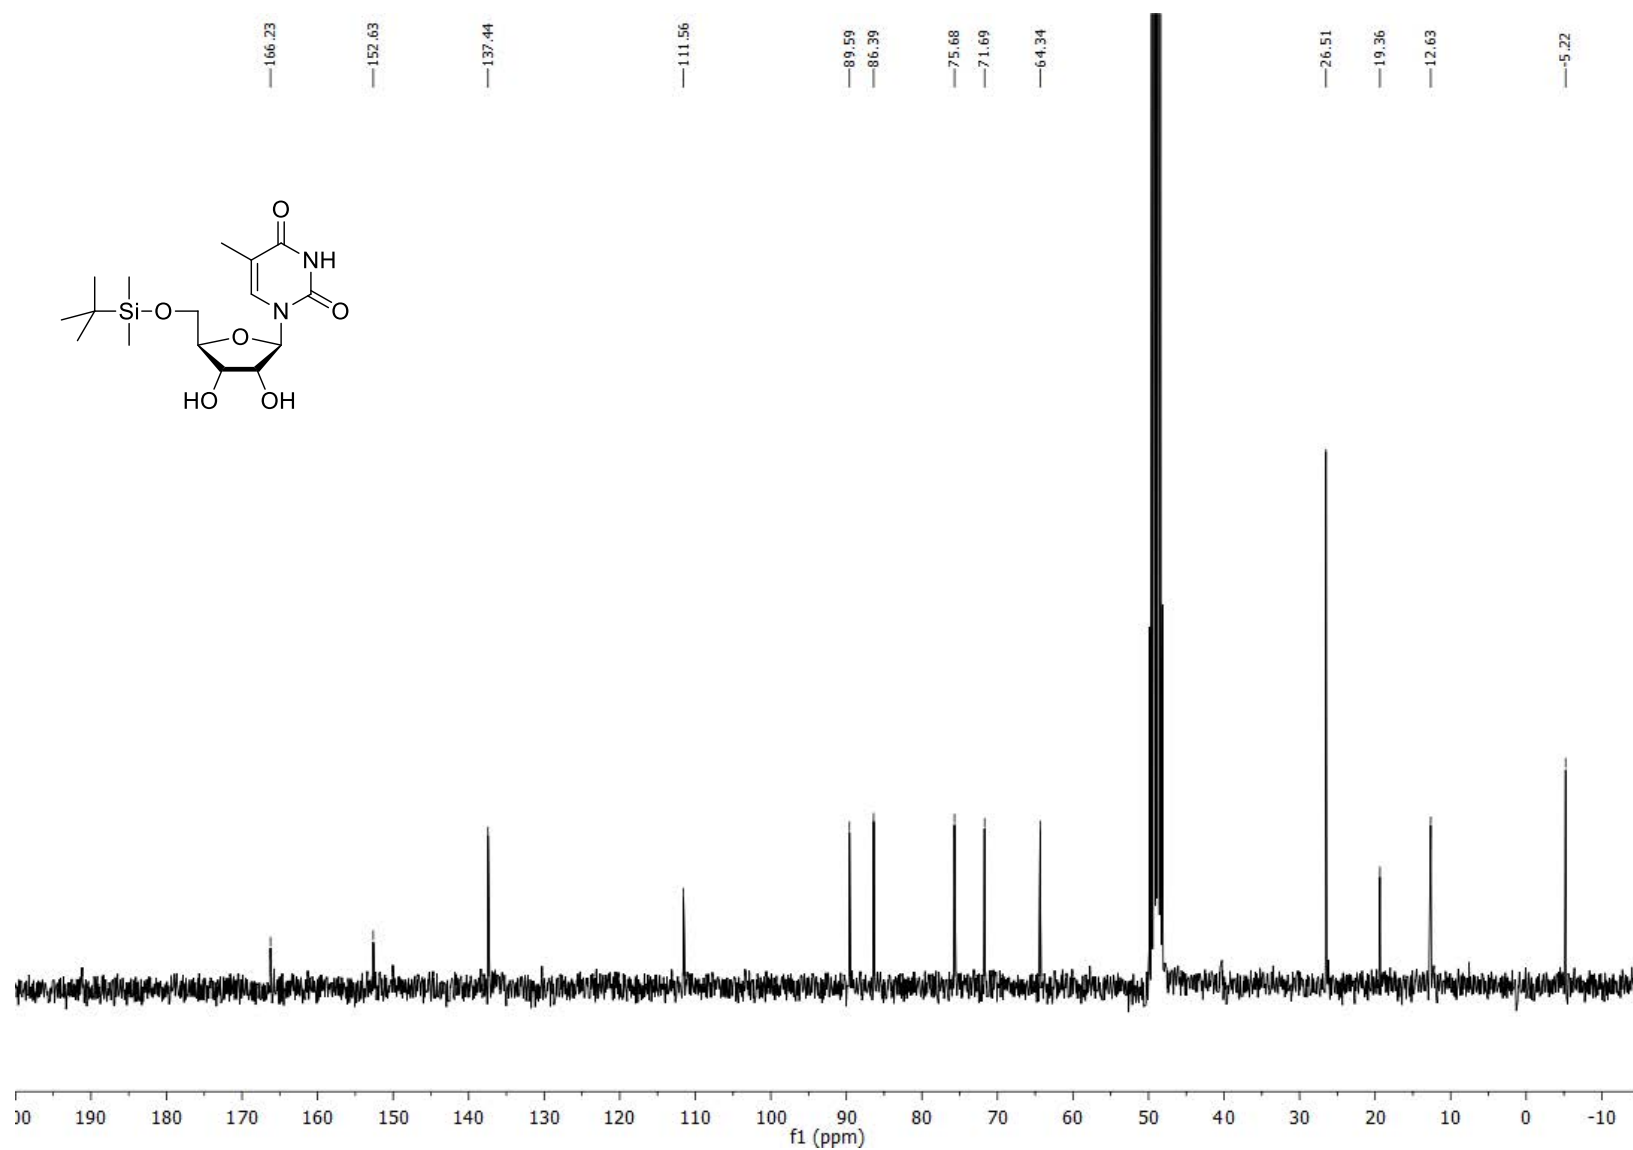

**5'-O-(*tert*-Butyldimethylsilyl)- $\beta$ -D-cytidine (5c)**

$^1\text{H-NMR}$  (300.13 MHz,  $\text{MeOH-}d_4$ )

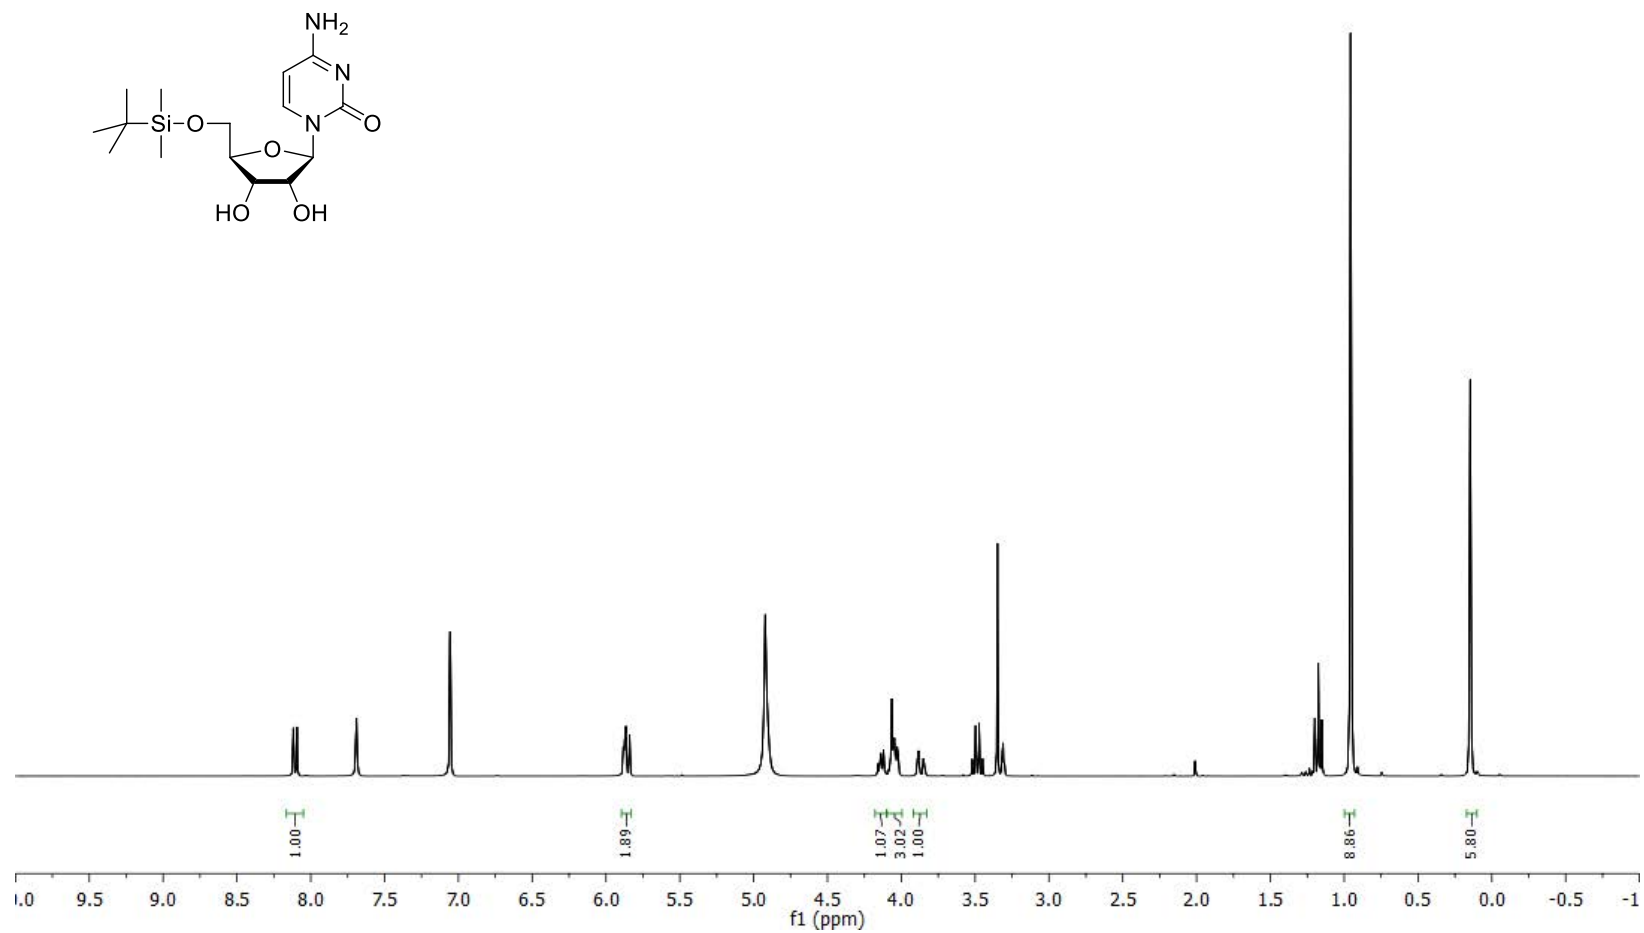

S45

# 5'-O-(*tert*-Butyldimethylsilyl)- $\beta$ -D-cytidine (5c)

$^{13}\text{C}$ -NMR (75.5 MHz,  $\text{MeOH-}d_4$ )

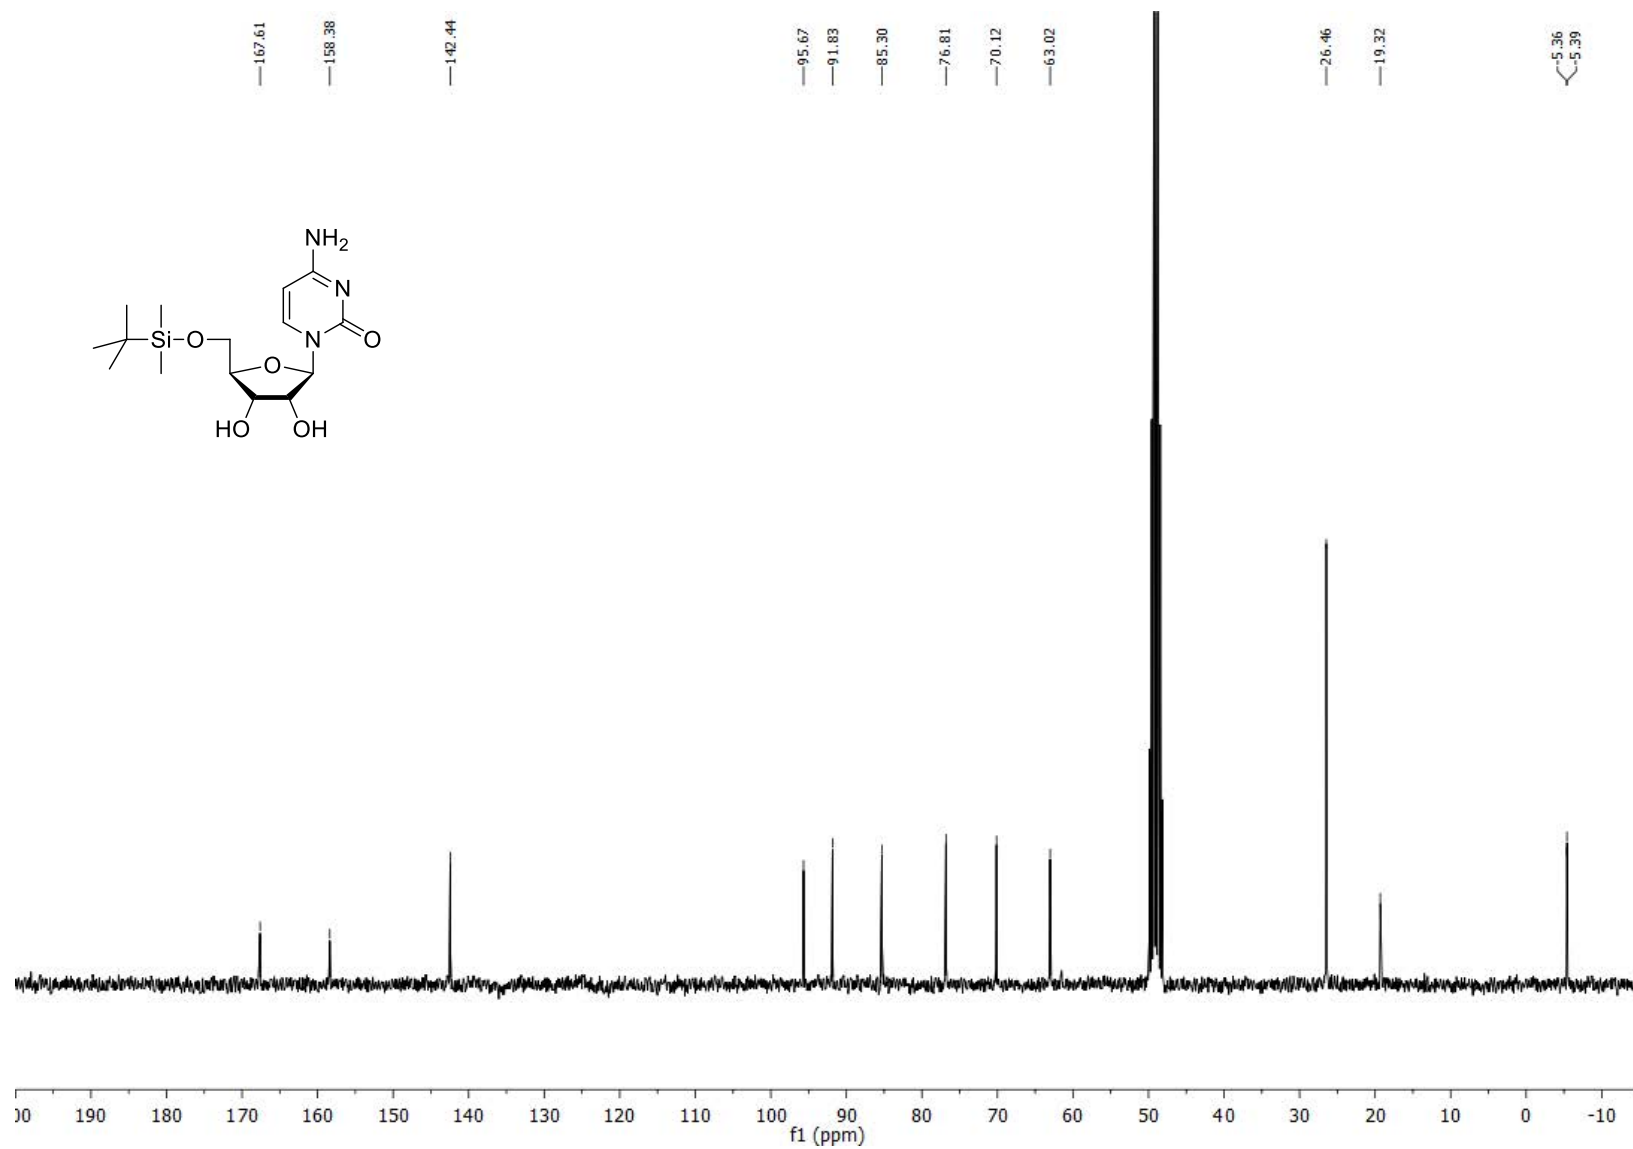

***N*<sup>4</sup>-Benzoyl-5'-*O*-(*tert*-butyldimethylsilyl)- $\beta$ -D-cytidine (5d)**

<sup>1</sup>H-NMR (300.13 MHz, MeOH-*d*<sub>4</sub>)

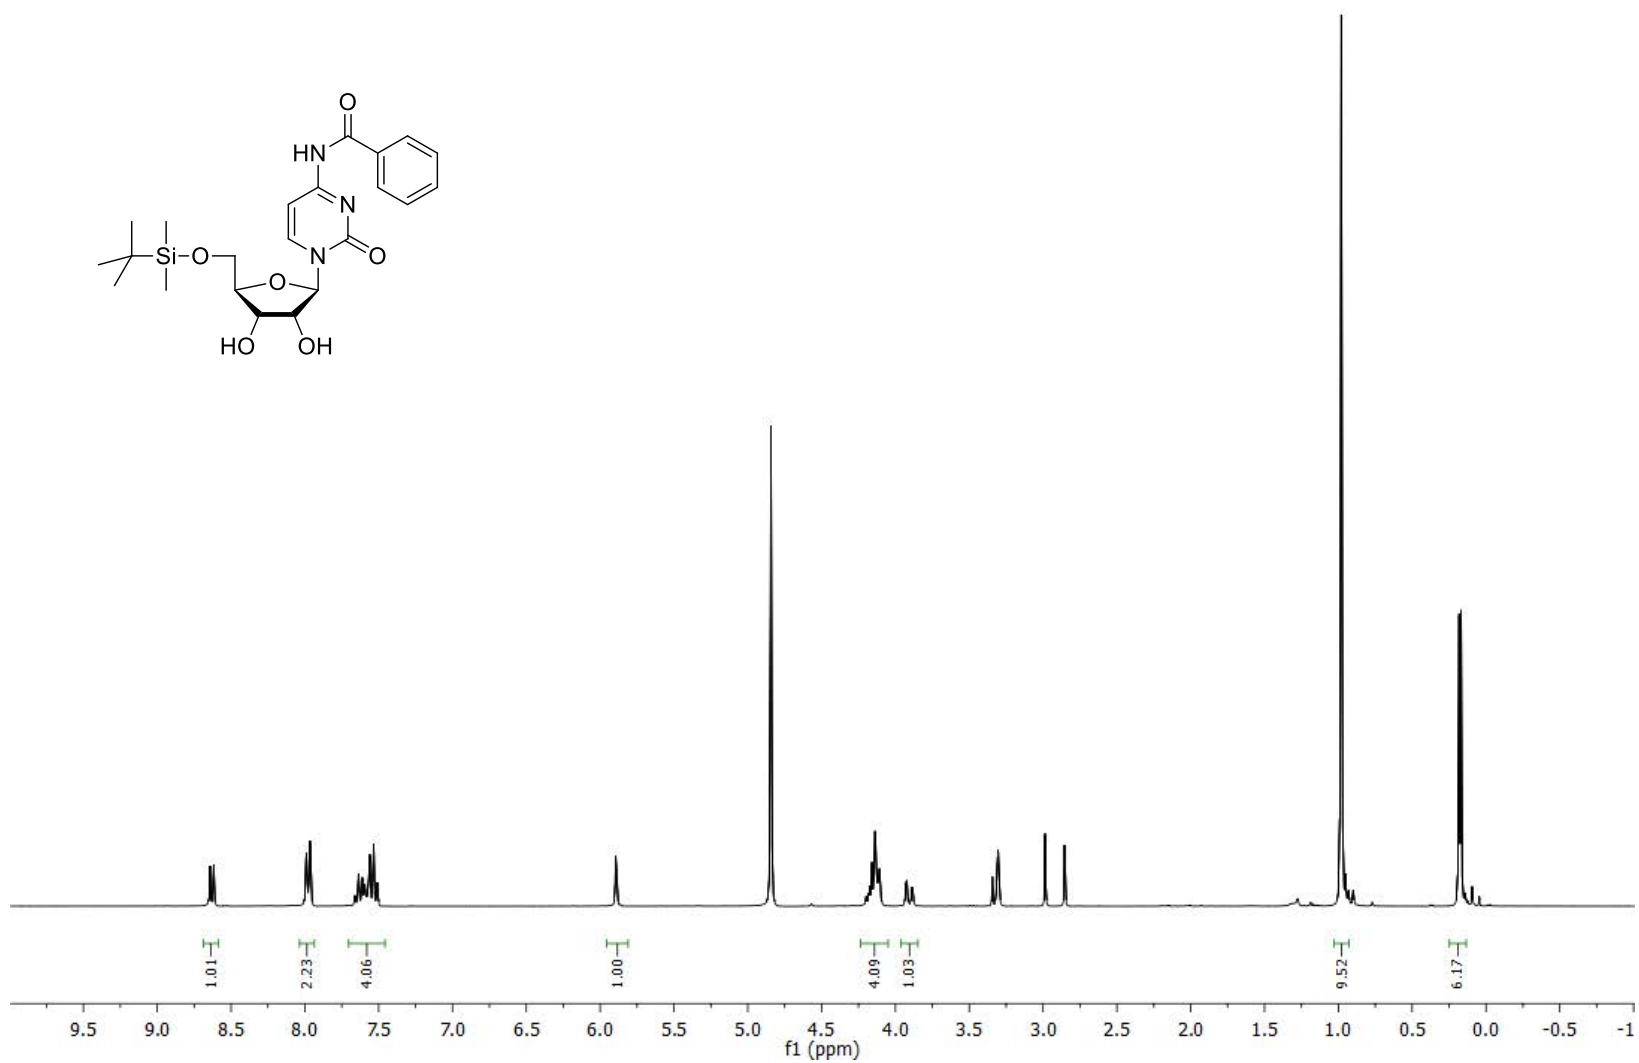

***N*<sup>4</sup>-Benzoyl-5'-*O*-(*tert*-butyldimethylsilyl)- $\beta$ -D-cytidine (5d)**

<sup>13</sup>C-NMR (75.5 MHz, MeOH-*d*<sub>4</sub>)

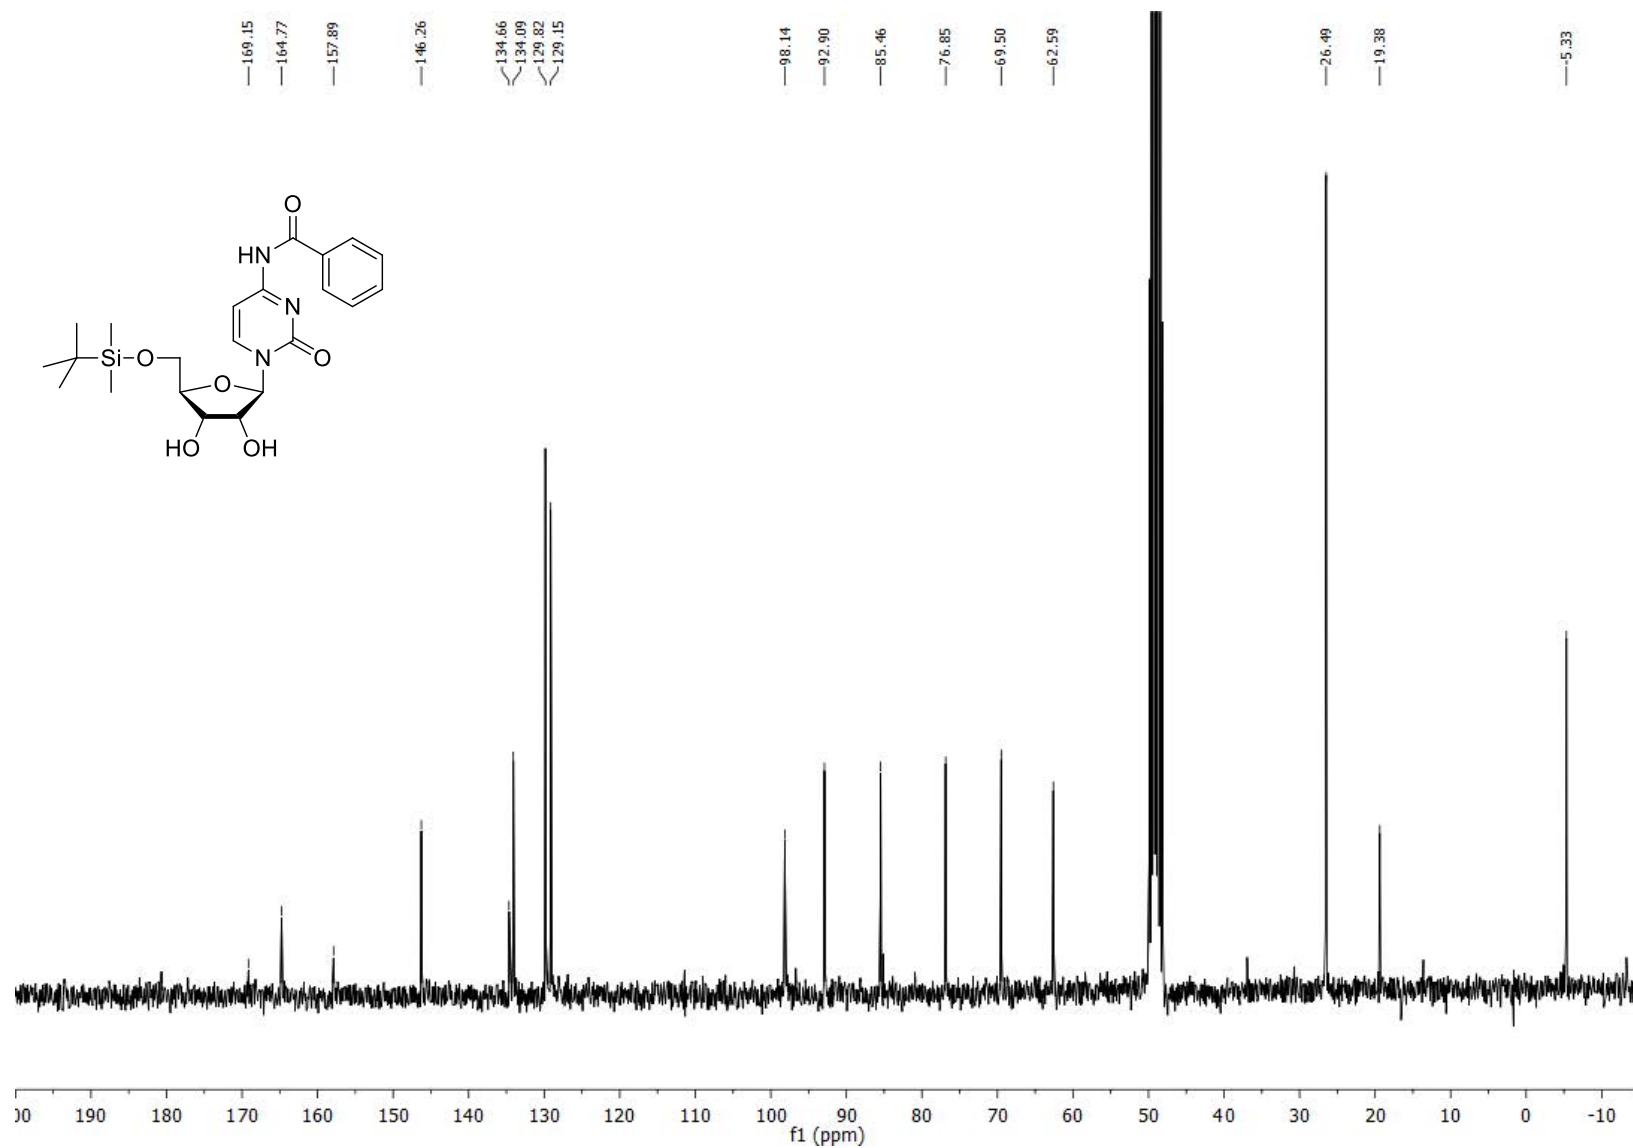



*N*<sup>4</sup>-Benzoyl-5'-*O*-(*tert*-butyldimethylsilyl)-β-D-cytidine (5d)

DEPT NMR (75.5 MHz, MeOH-*d*<sub>4</sub>)

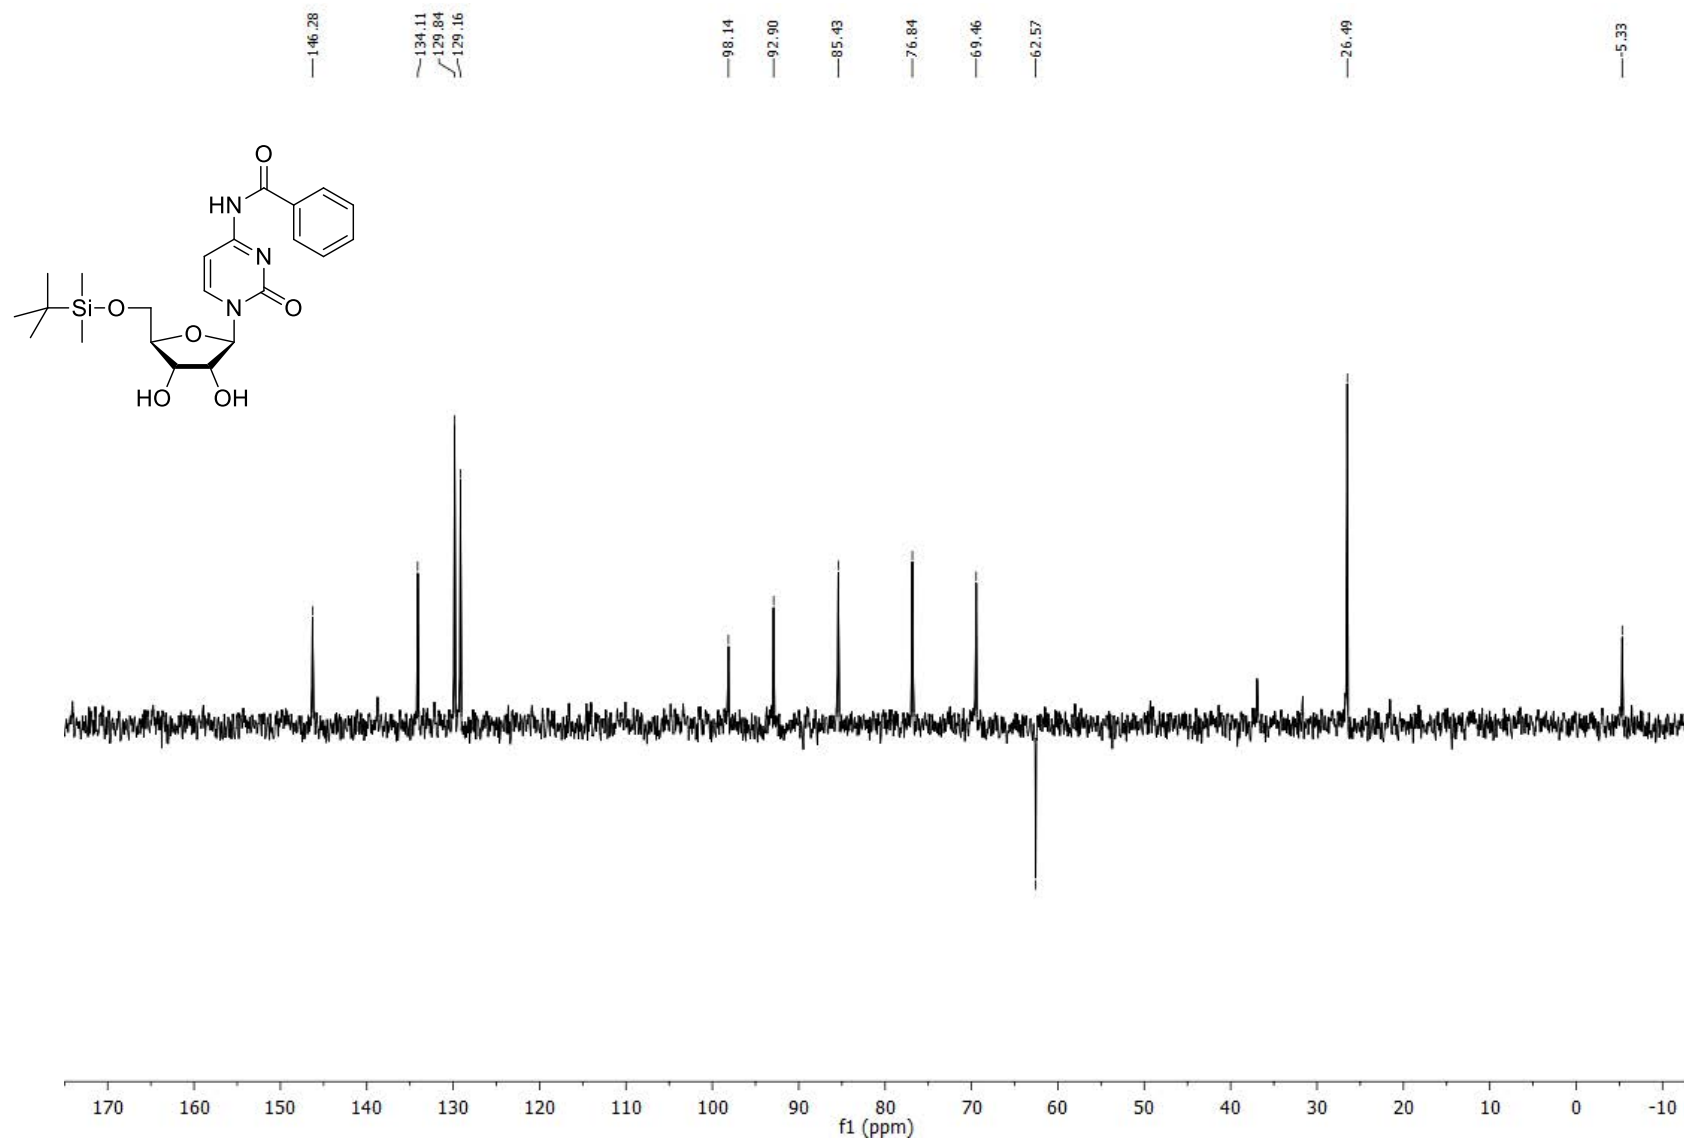

*N*<sup>4</sup>-Benzoyl-5'-*O*-(*tert*-butyldimethylsilyl)-β-D-cytidine (5d)

HSQC NMR (MeOH-*d*<sub>4</sub>)

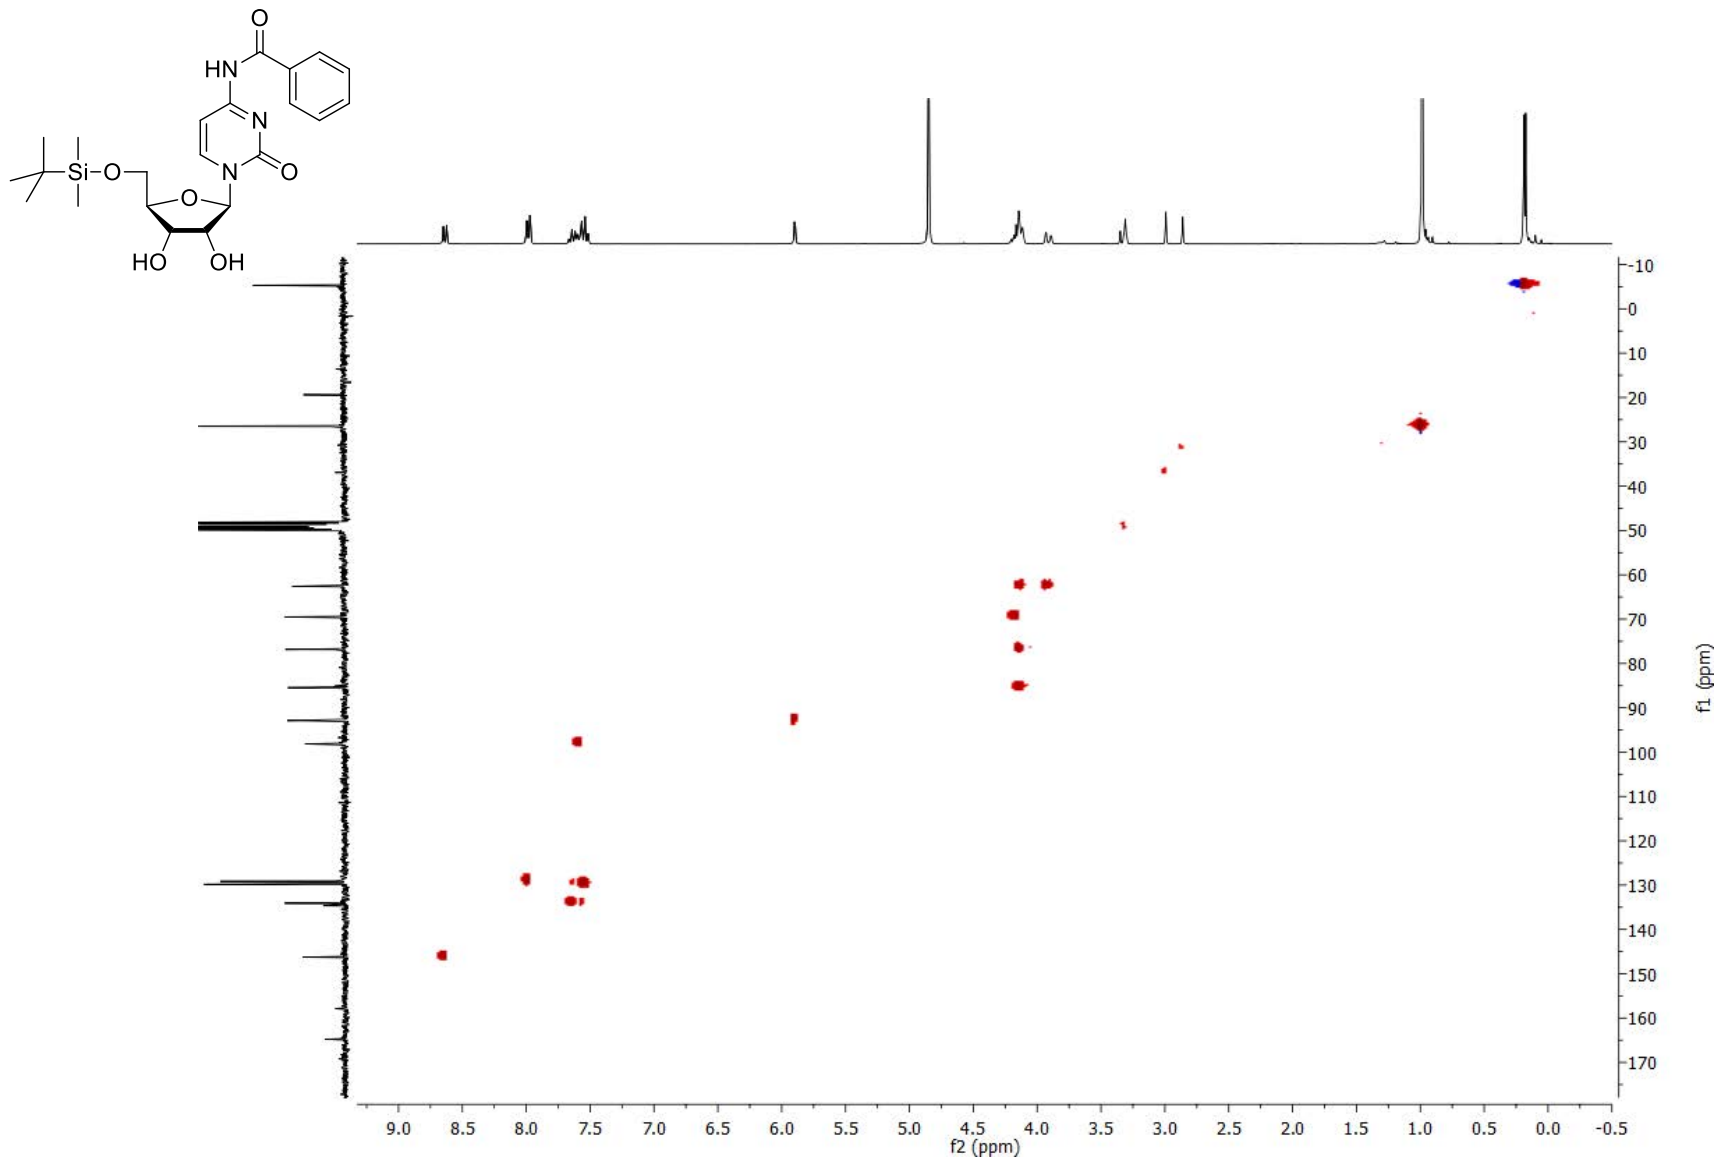

**5'-*O*-(*tert*-Butyldimethylsilyl)- $\beta$ -D-adenosine (5e)**

$^1\text{H-NMR}$  (300.13 MHz,  $\text{MeOH-}d_4$ )

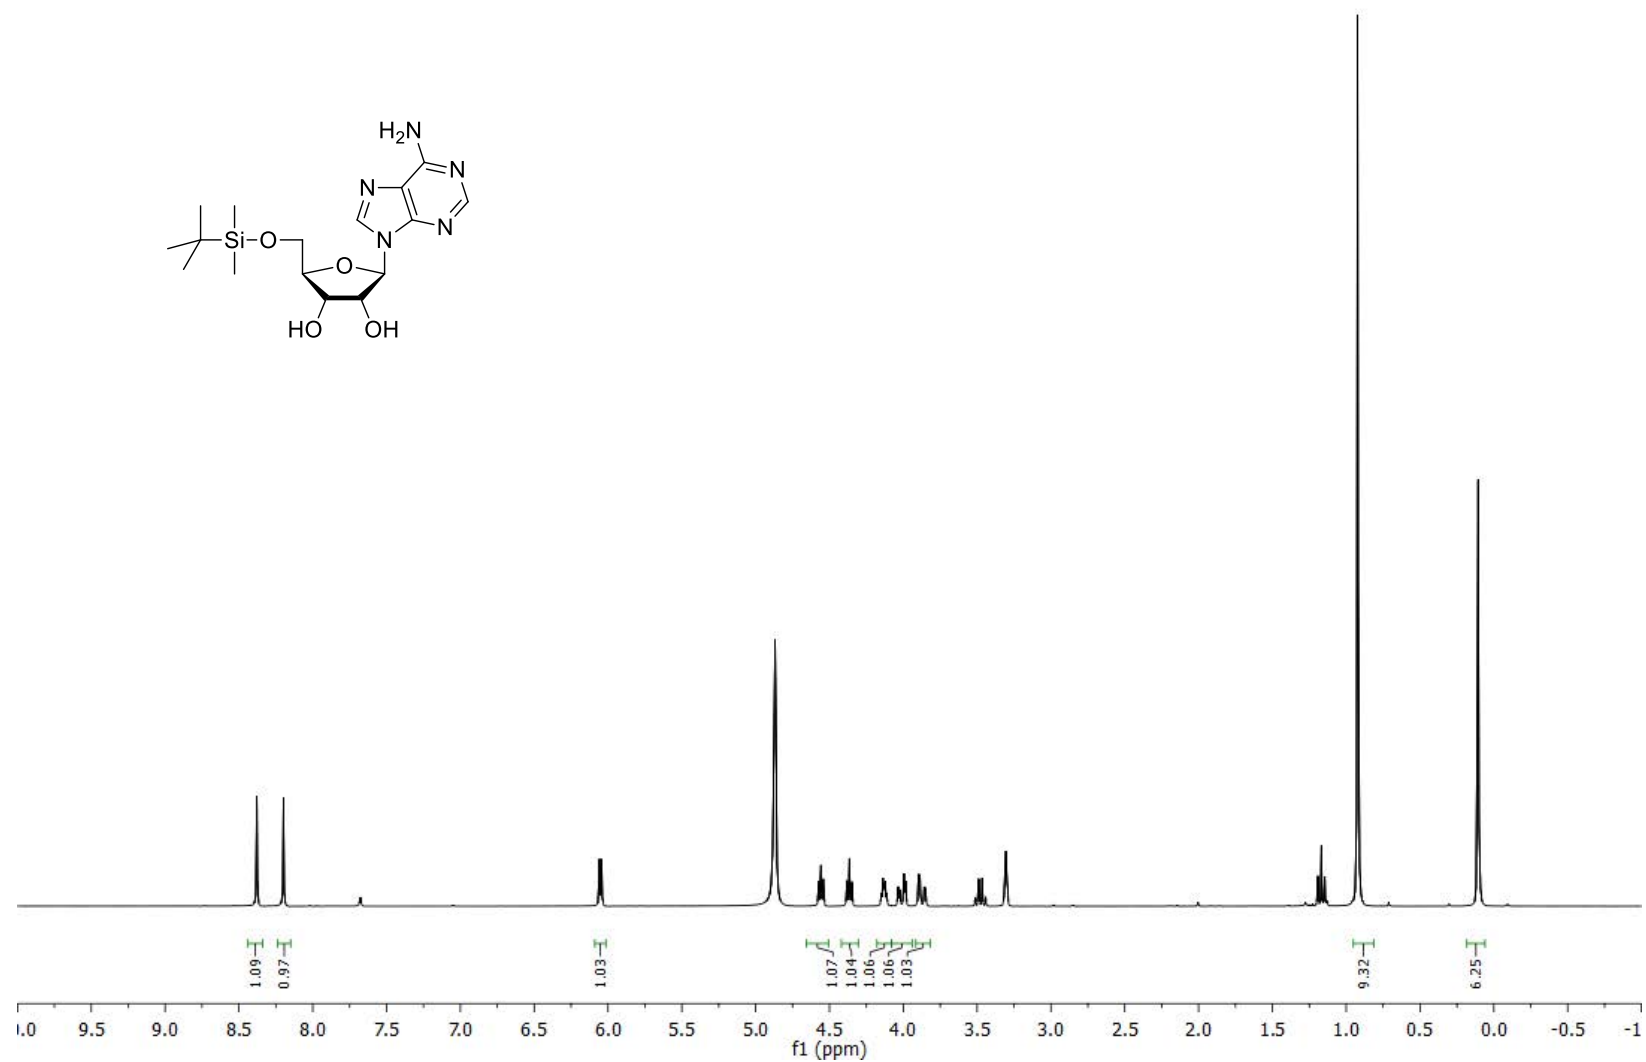

S51

**5'-O-(*tert*-Butyldimethylsilyl)- $\beta$ -D-adenosine (5e)**

$^{13}\text{C}$ -NMR (75.5 MHz,  $\text{MeOH-}d_4$ )

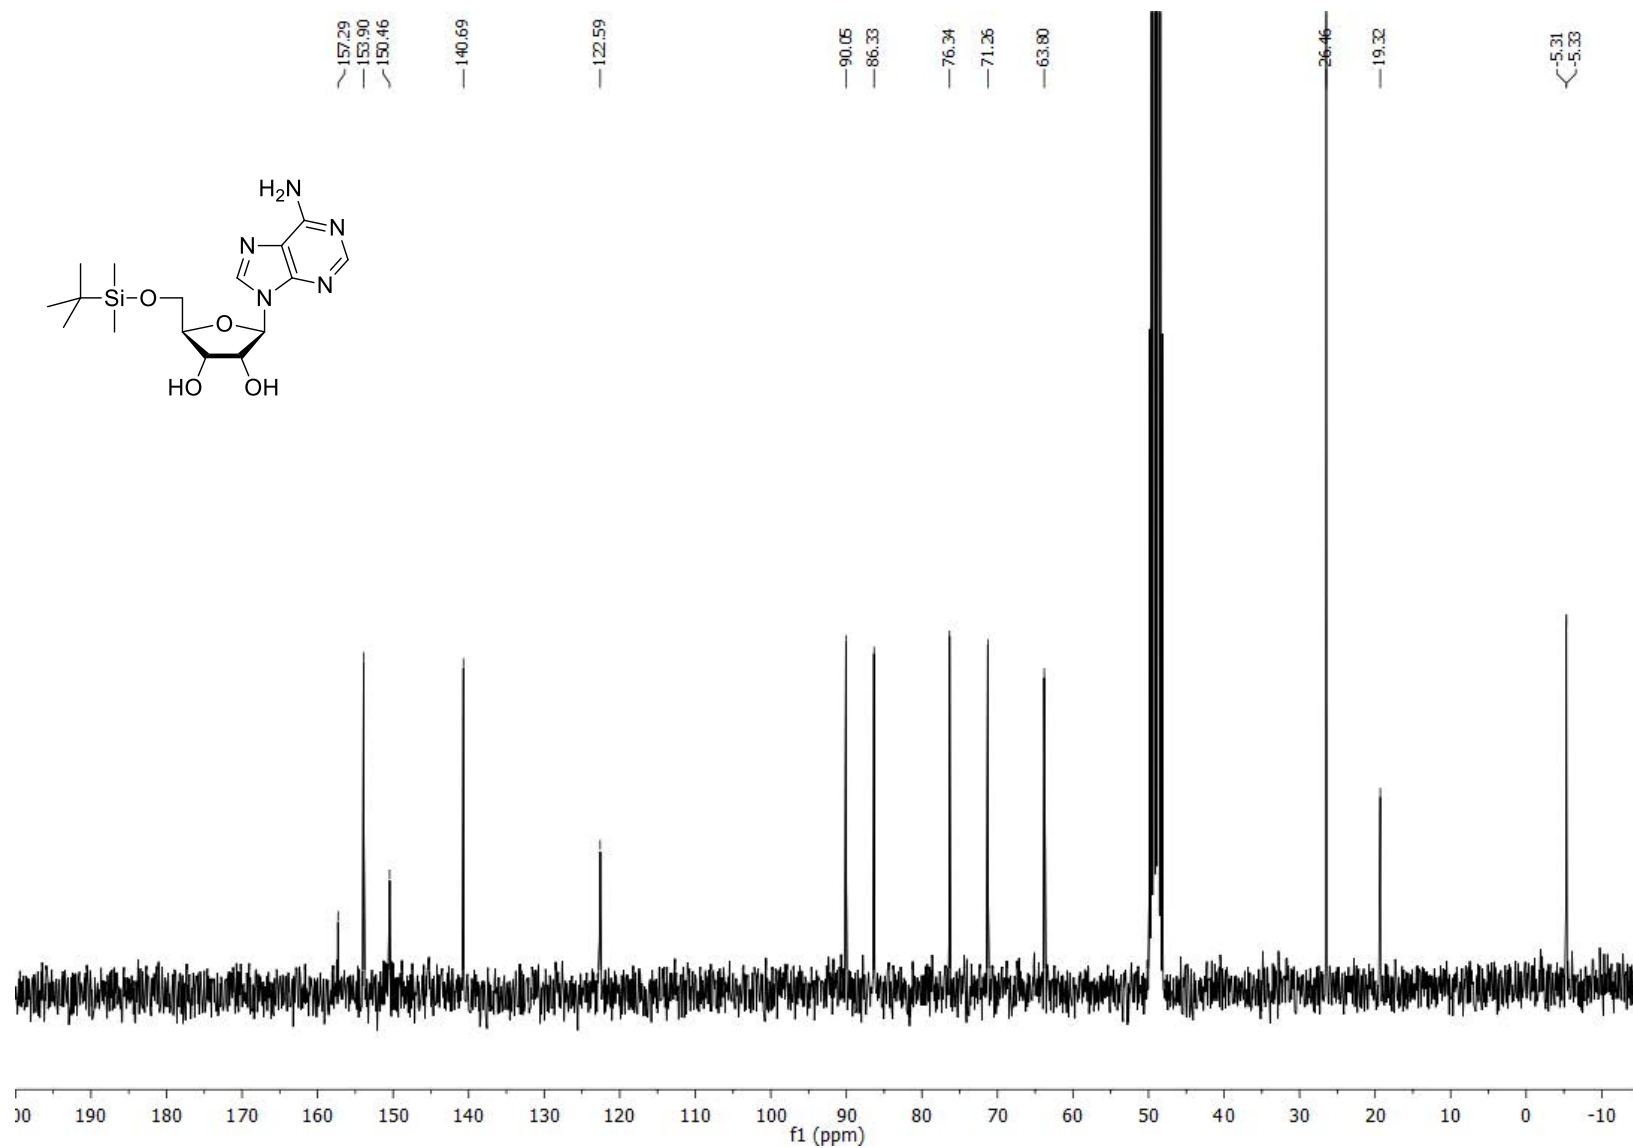

5'-O-(*tert*-Butyldimethylsilyl)- $\beta$ -D-inosine (5f)

$^1\text{H}$ -NMR (300.13 MHz,  $\text{MeOH-}d_4$ )

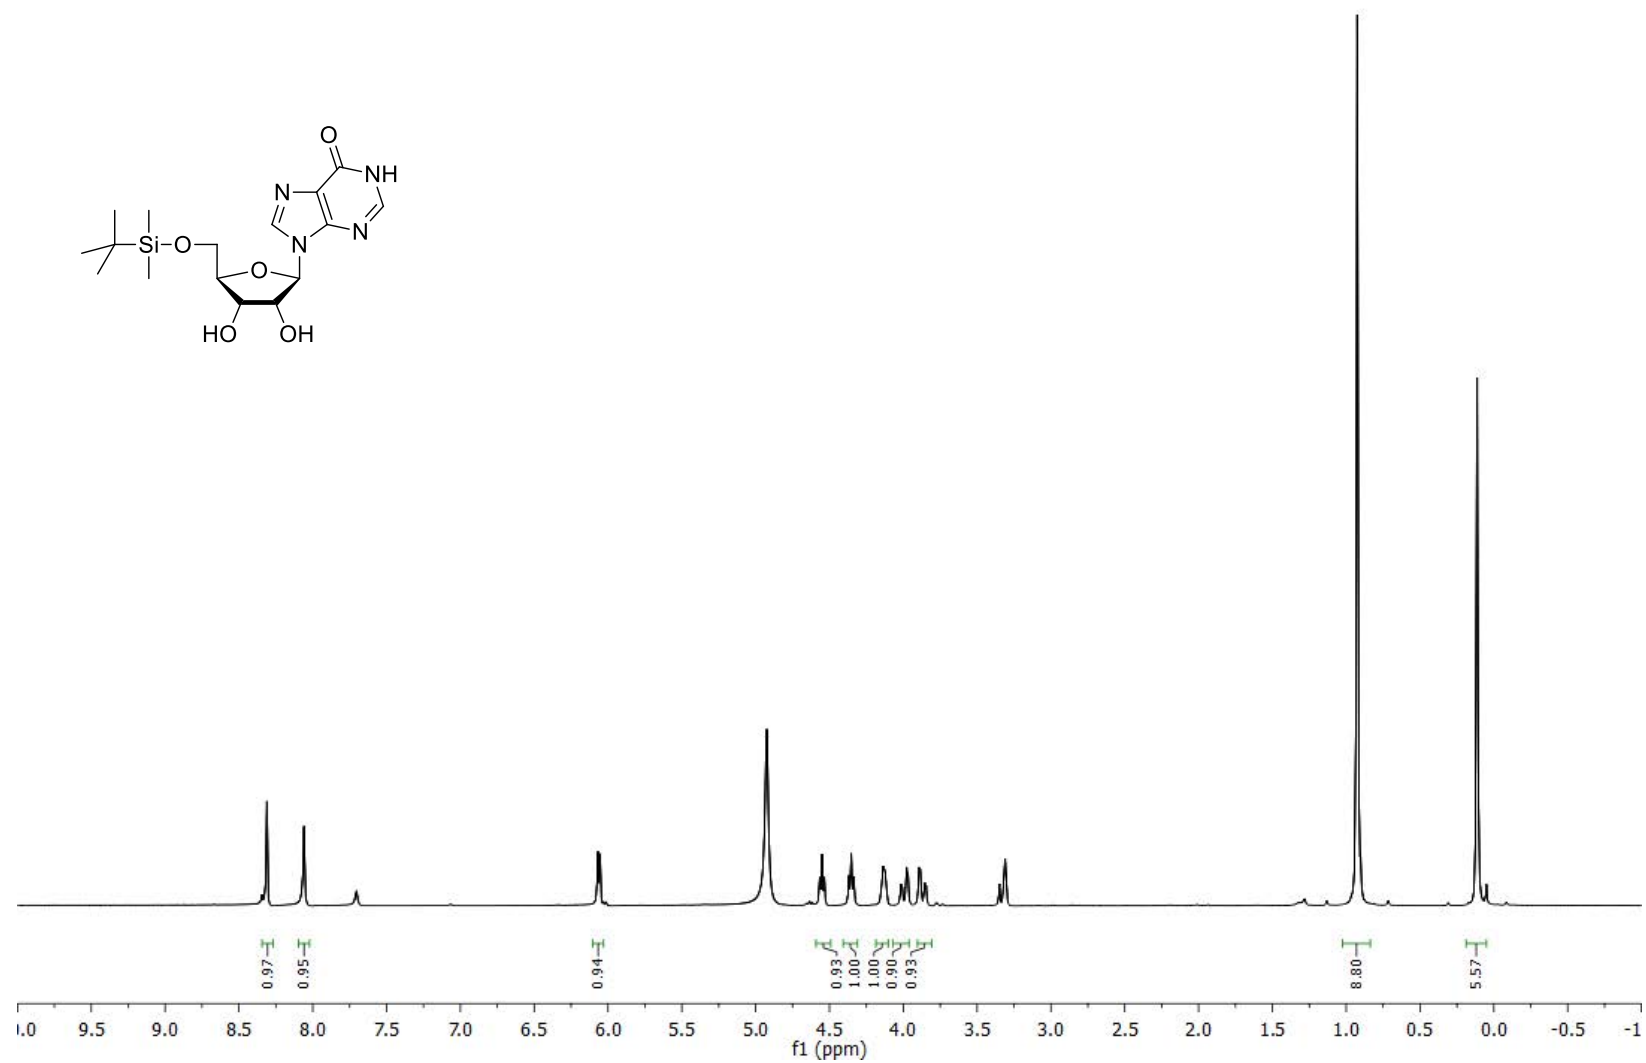

S53

# 5'-O-(*tert*-Butyldimethylsilyl)- $\beta$ -D-inosine (5f)

$^{13}\text{C}$ -NMR (75.5 MHz,  $\text{MeOH-}d_4$ )

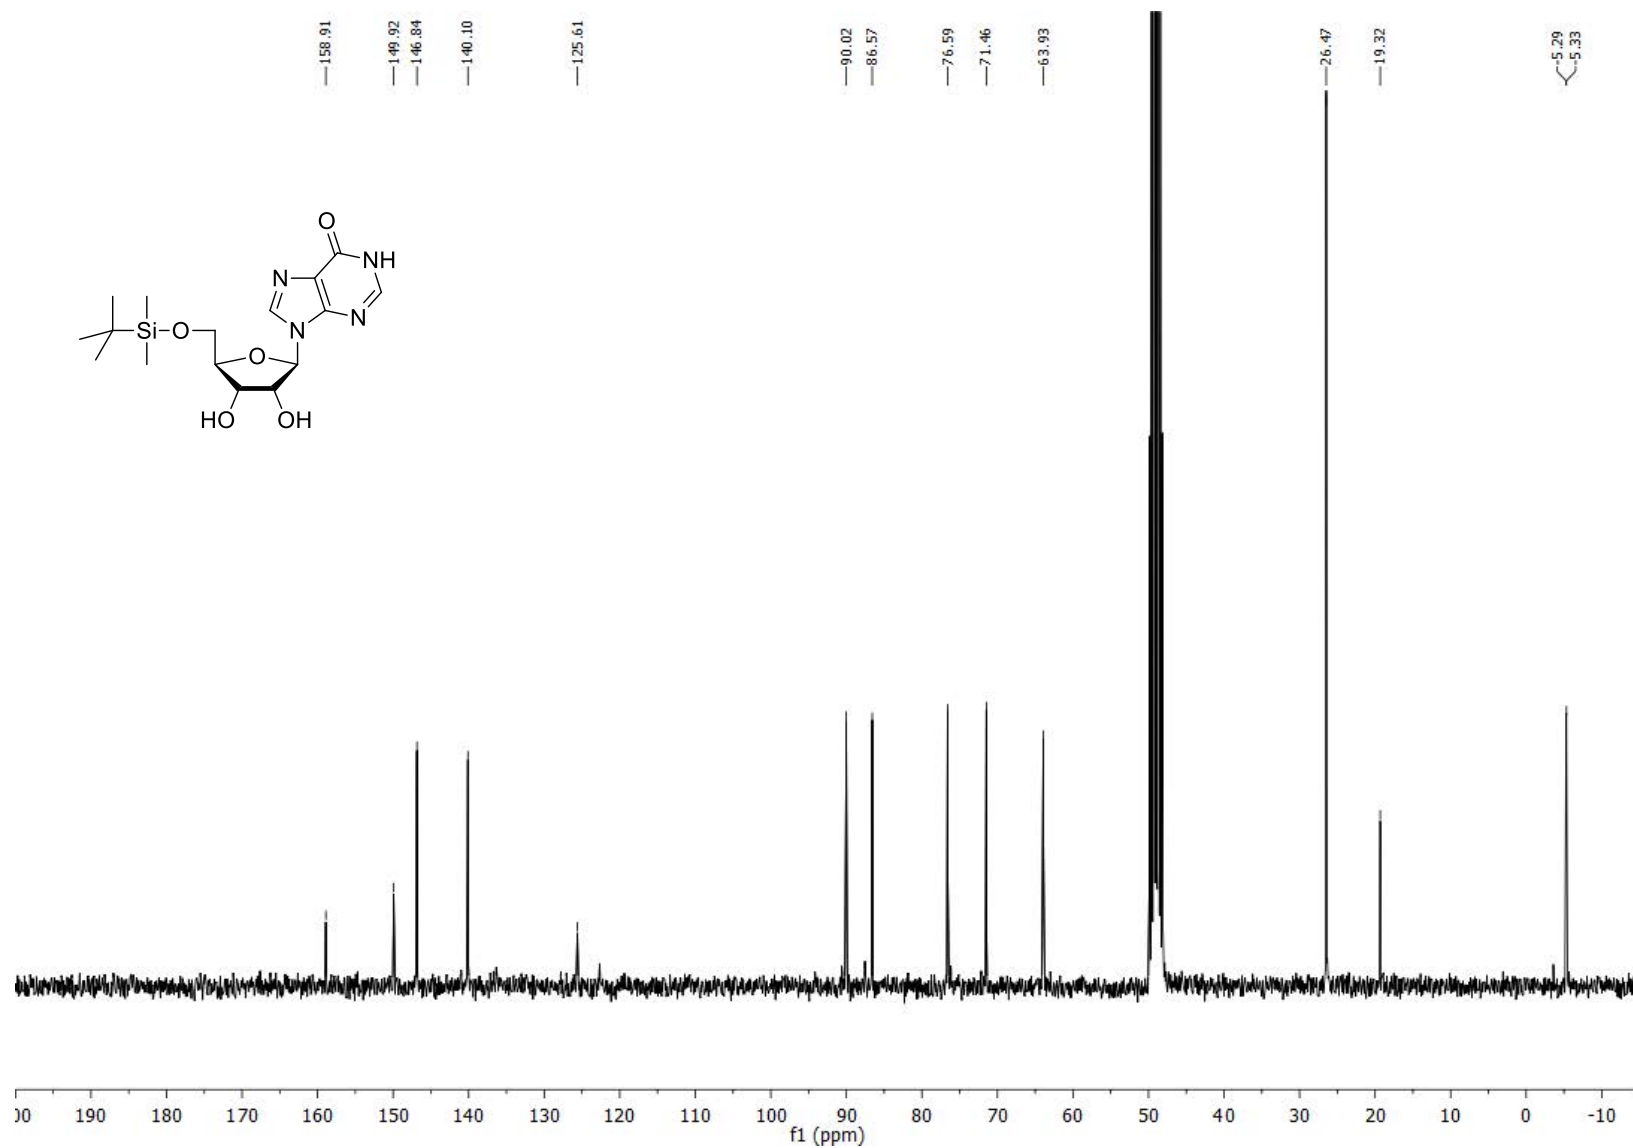

5'-*O*-(*tert*-Butyldimethylsilyl)- $\beta$ -D-inosine (5f)

DEPT NMR (75.5 MHz, MeOH-*d*<sub>4</sub>)

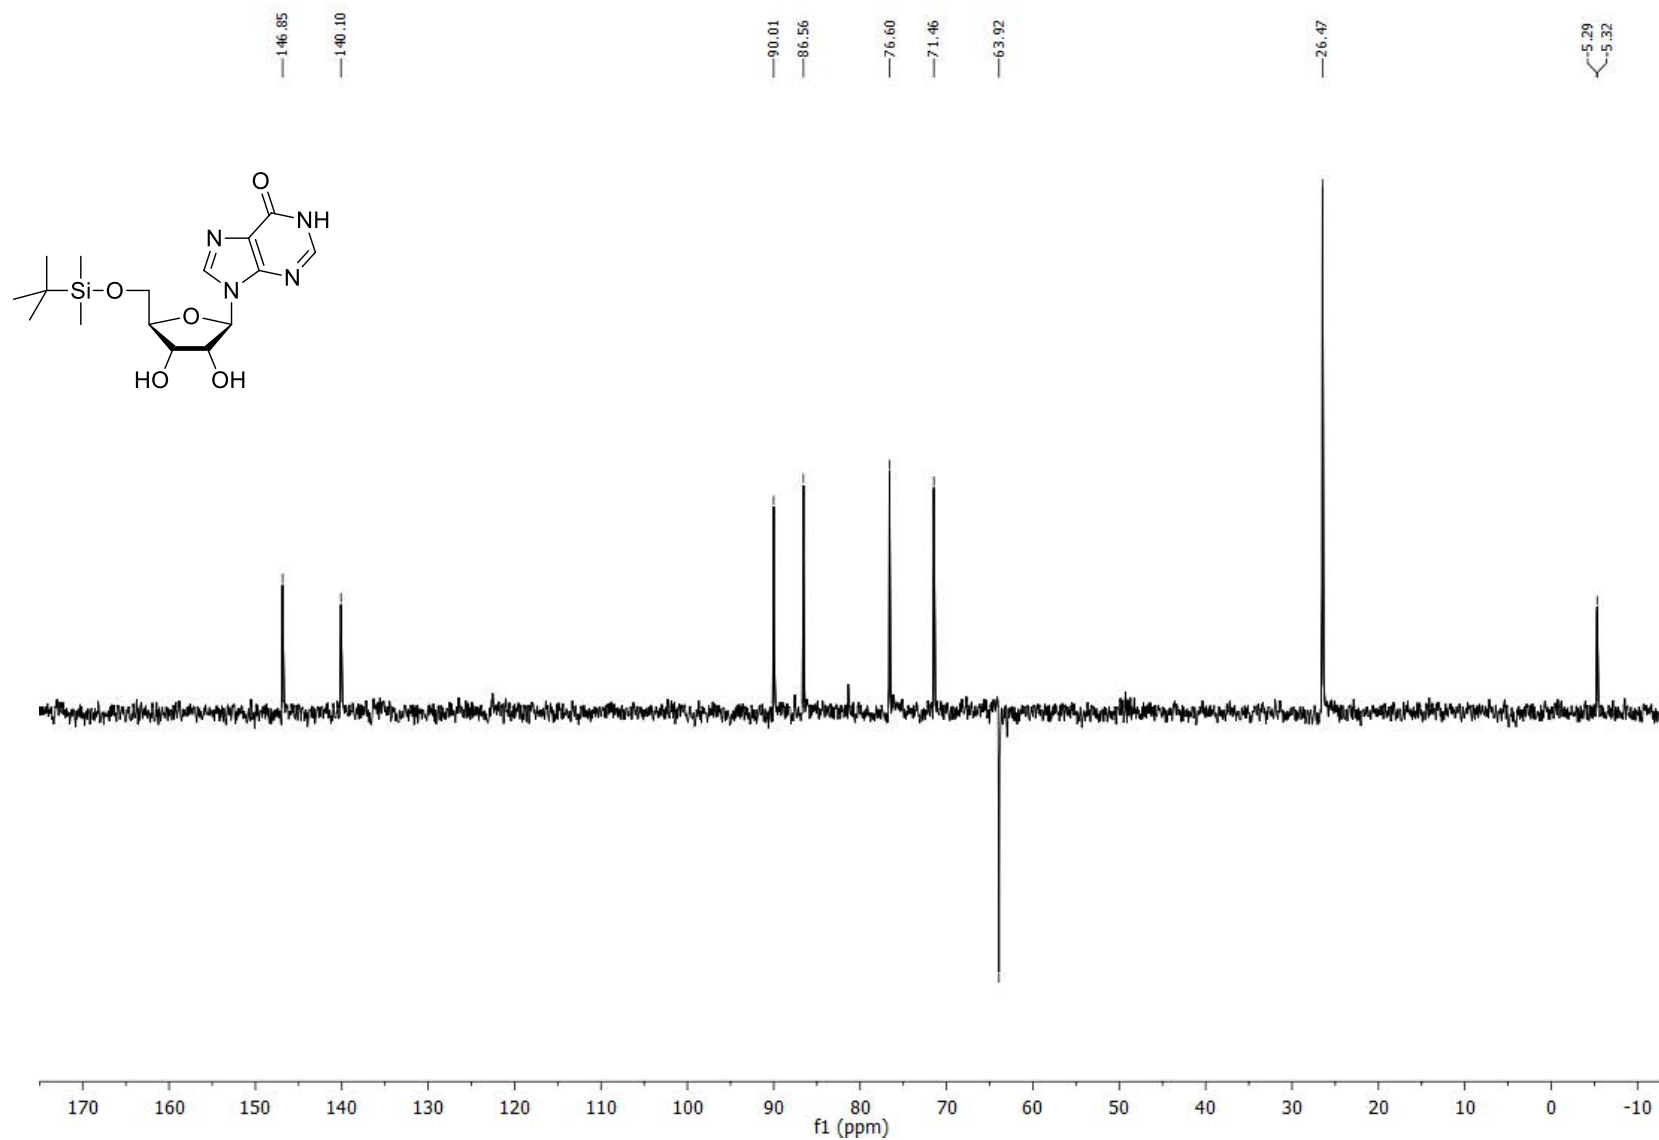

5'-*O*-(*tert*-Butyldimethylsilyl)- $\beta$ -D-inosine (5f)

COSY NMR (MeOH- $d_4$ )

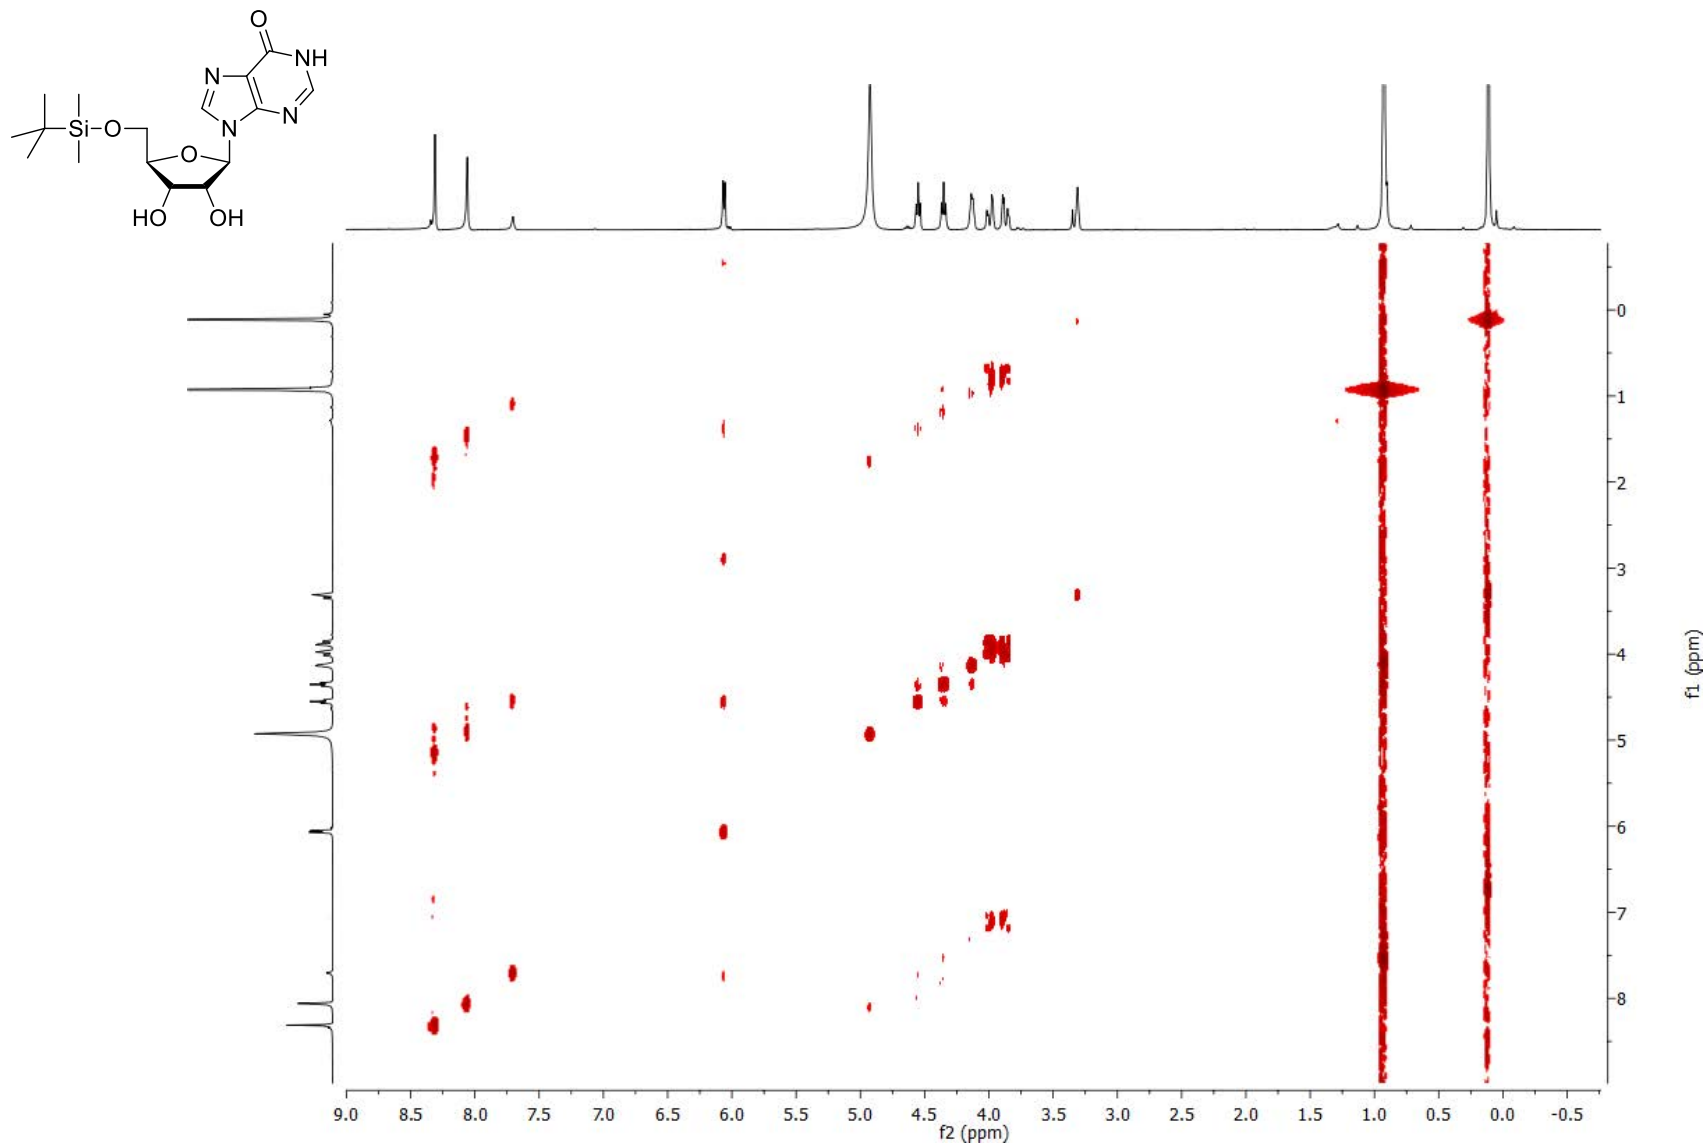



5'-*O*-(*tert*-Butyldimethylsilyl)- $\beta$ -D-inosine (5f)

HSQC NMR (MeOH- $d_4$ )

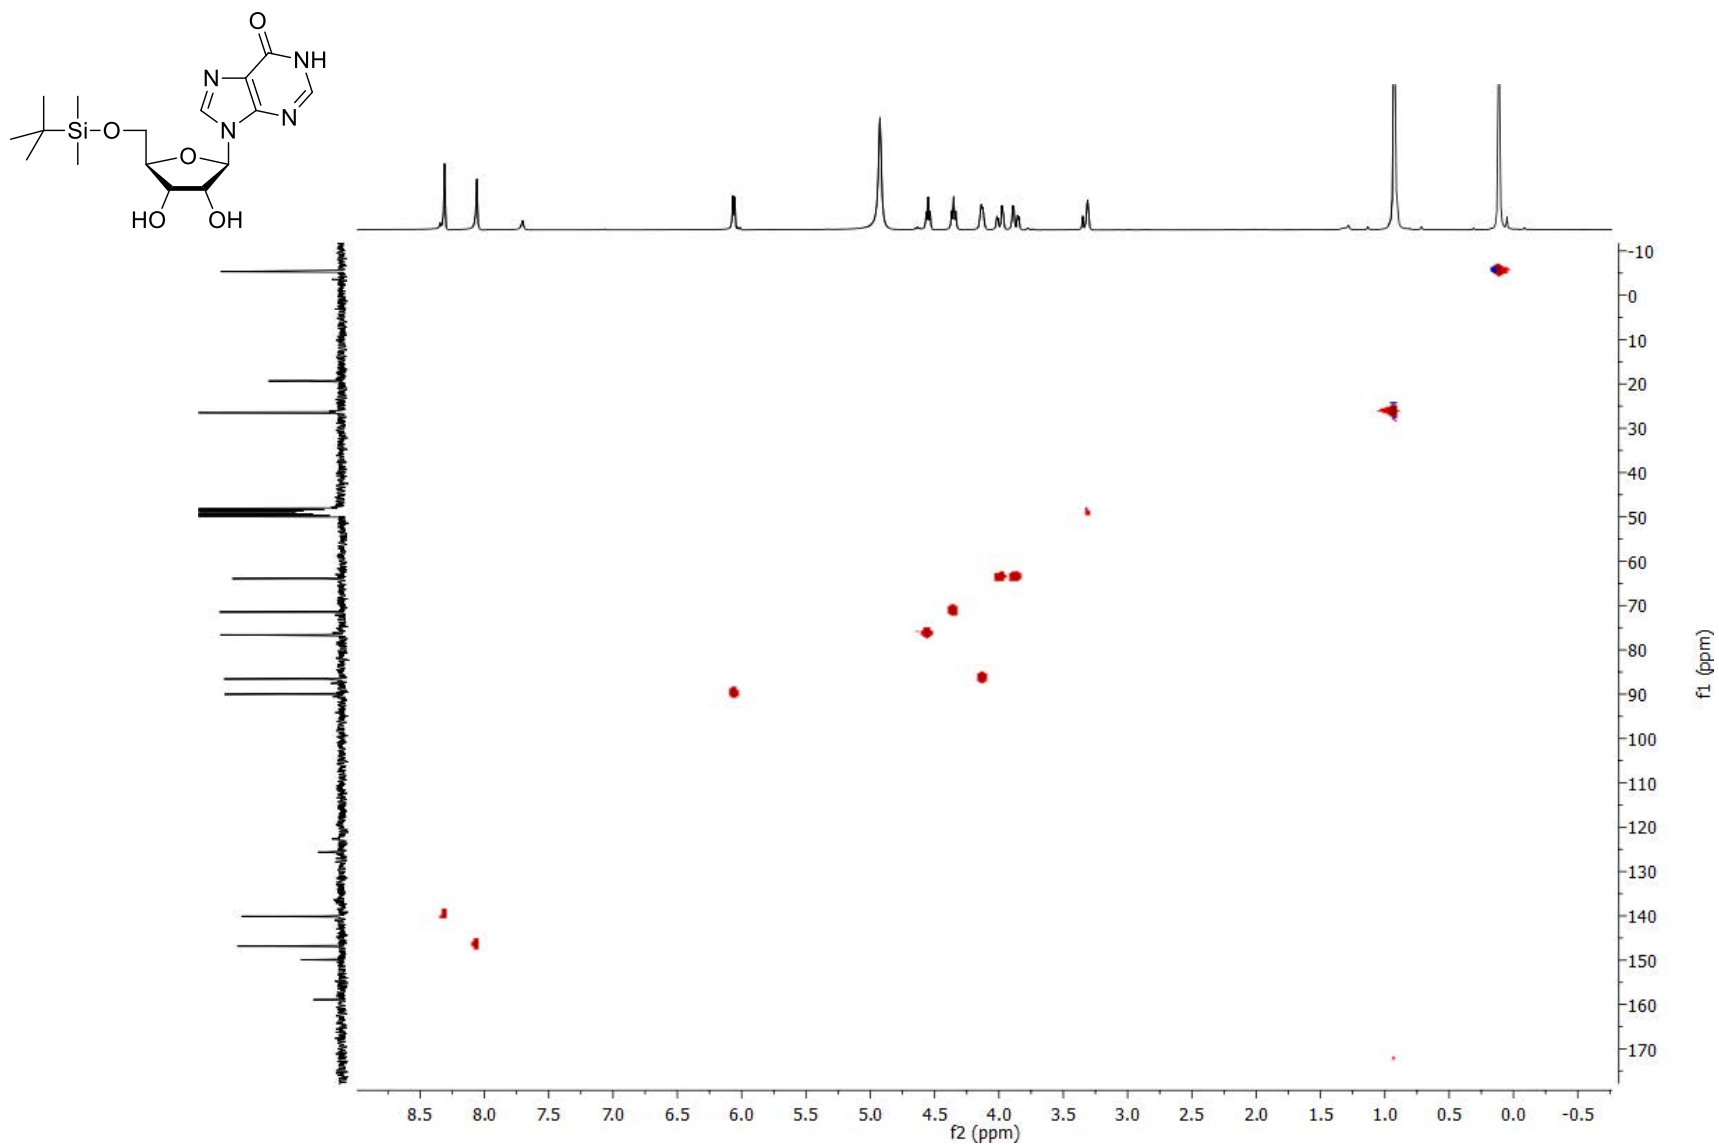

5'-*O*-(*tert*-Butyldimethylsilyl)- $\beta$ -D-inosine (5f)

HMBC NMR (MeOH- $d_4$ )

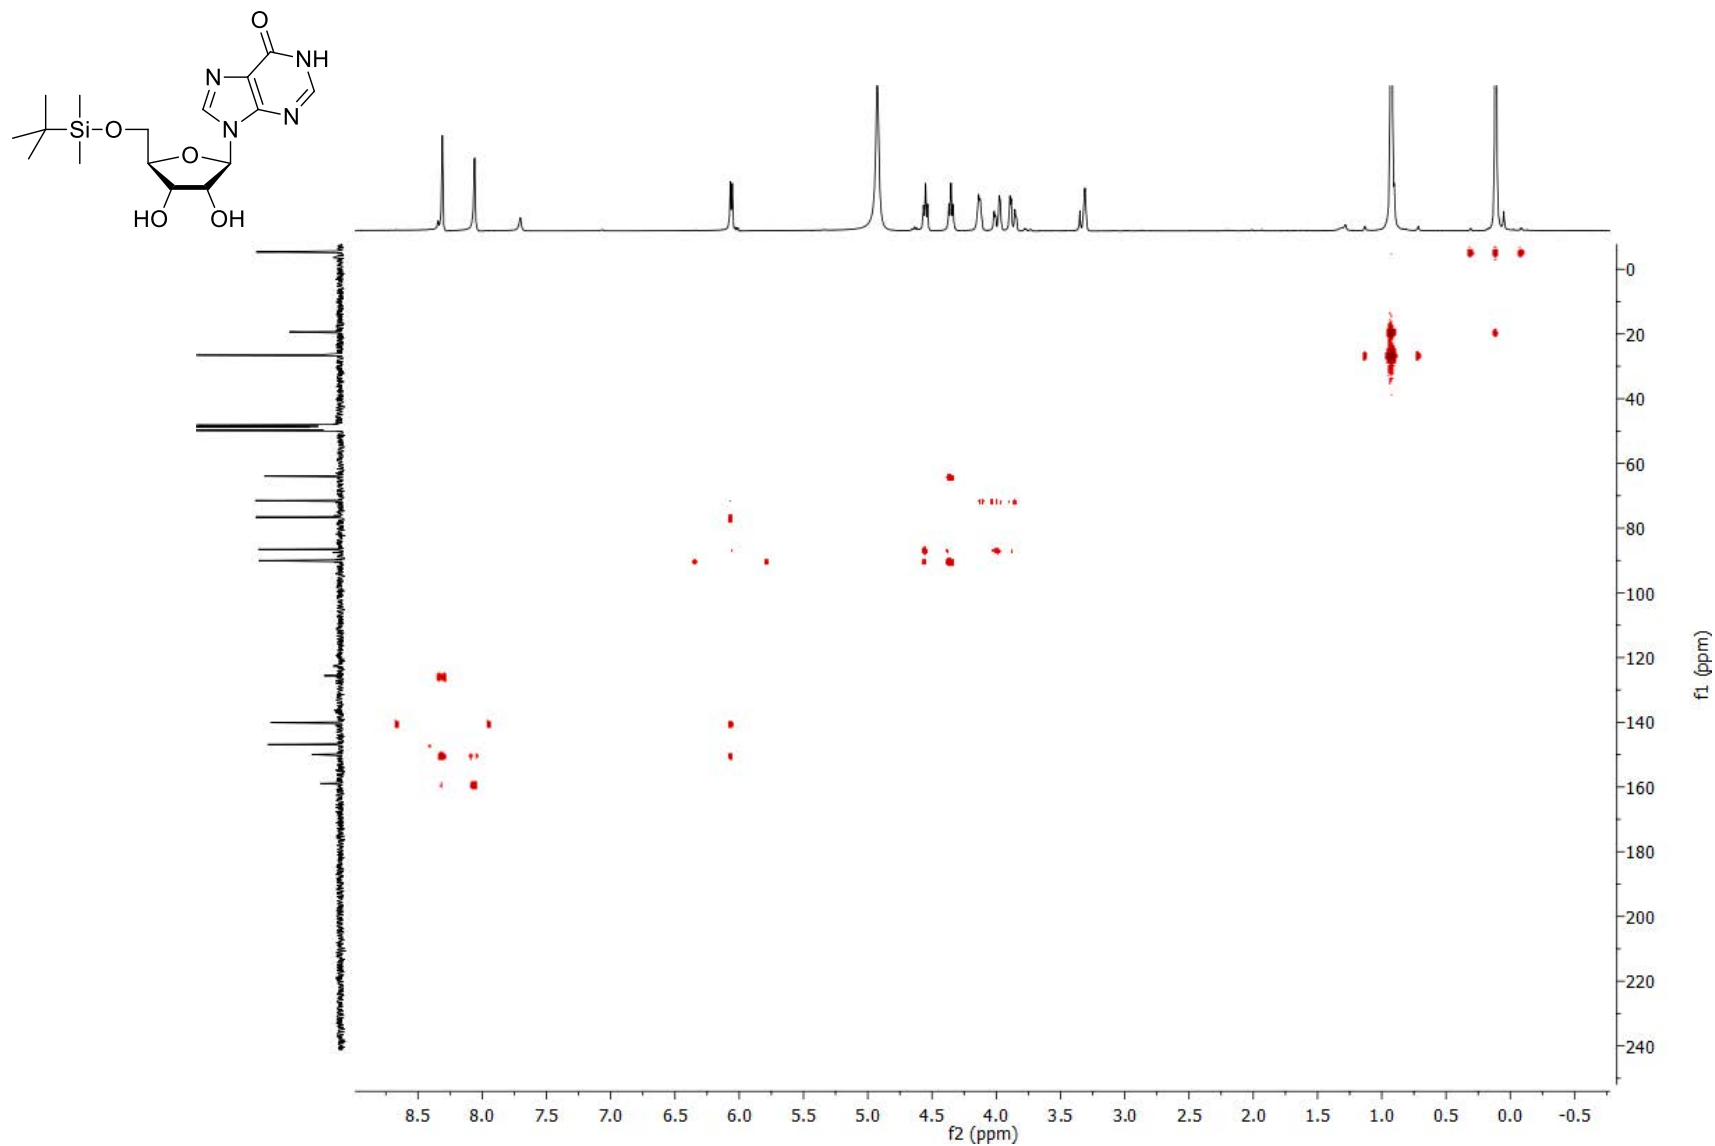

5'-*O*-(*tert*-Butyldimethylsilyl)-2',3'-bis-*O*-[(ethylthio)thiocarbonyl]- $\beta$ -D-uridine (6a)

$^1\text{H}$ -NMR (300.13 MHz,  $\text{CDCl}_3$ )

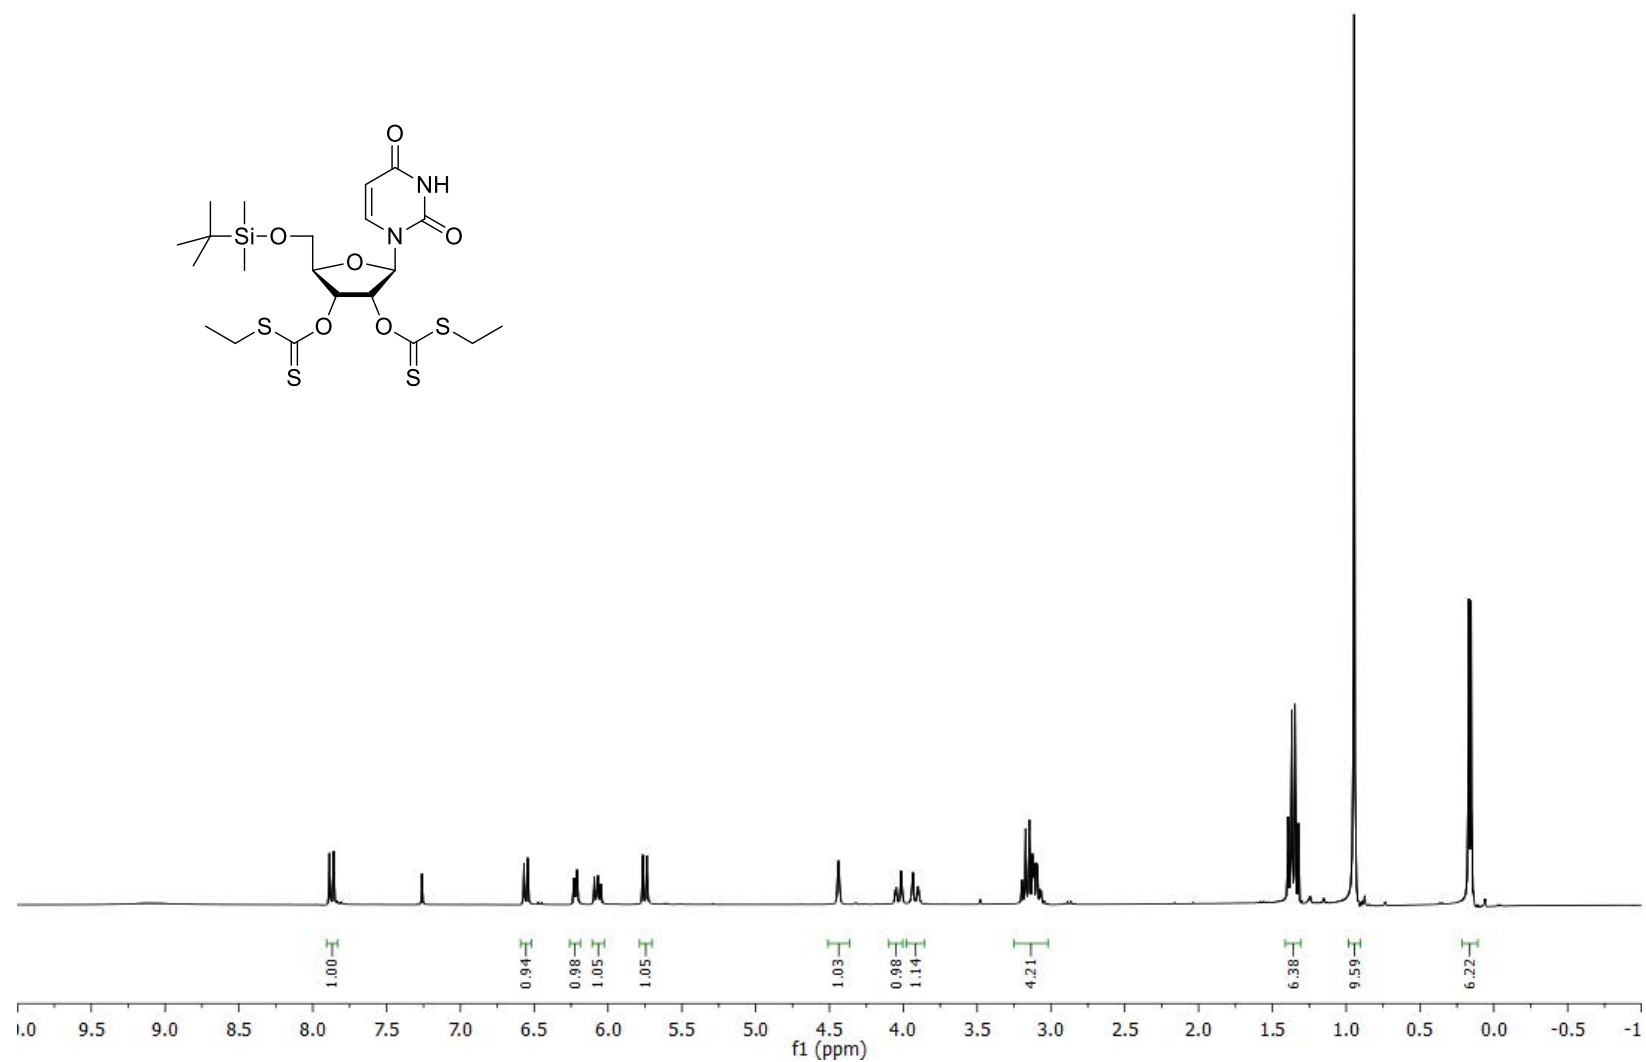

5'-O-(*tert*-Butyldimethylsilyl)-2',3'-bis-O-[(ethylthio)thiocarbonyl]- $\beta$ -D-uridine (6a)

$^{13}\text{C}$ -NMR (75.5 MHz,  $\text{CDCl}_3$ )

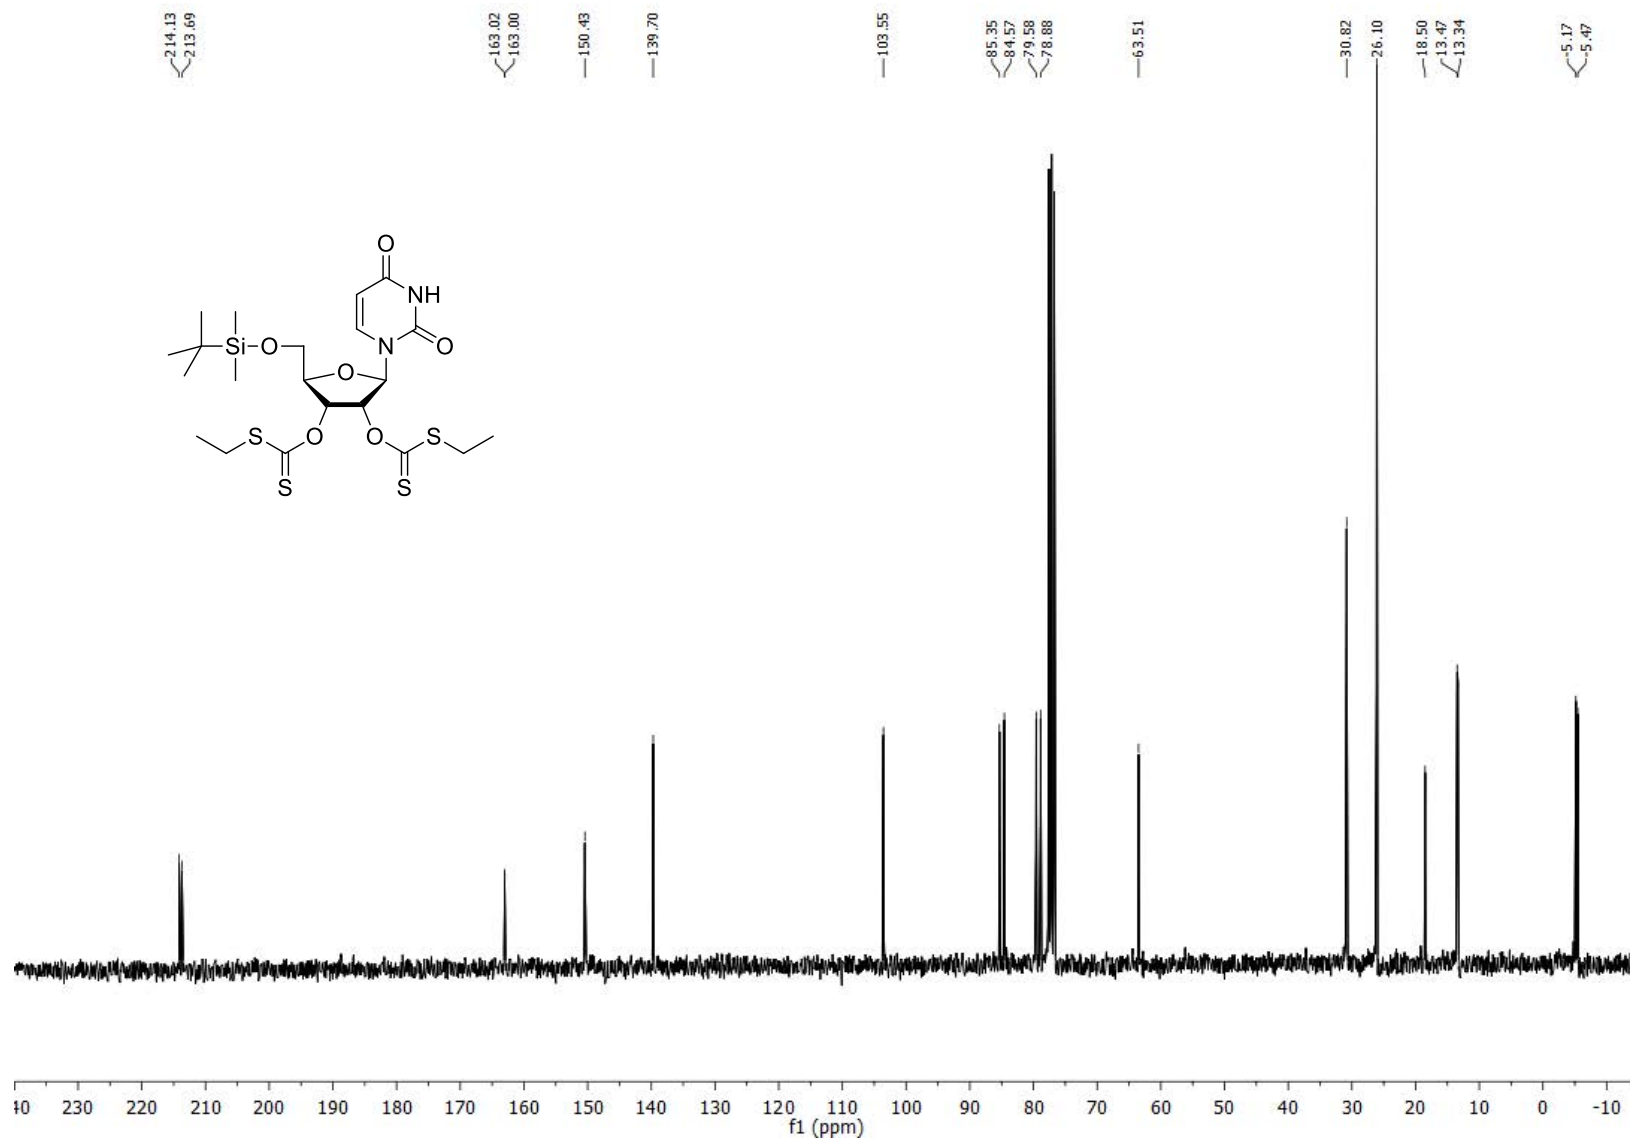

**5'-O-(*tert*-Butyldimethylsilyl)-2',3'-bis-O-[(ethylthio)thiocarbonyl]- $\beta$ -D-uridine (6a)**

$^{13}\text{C}$ -NMR (75.5 MHz,  $\text{CDCl}_3$ )

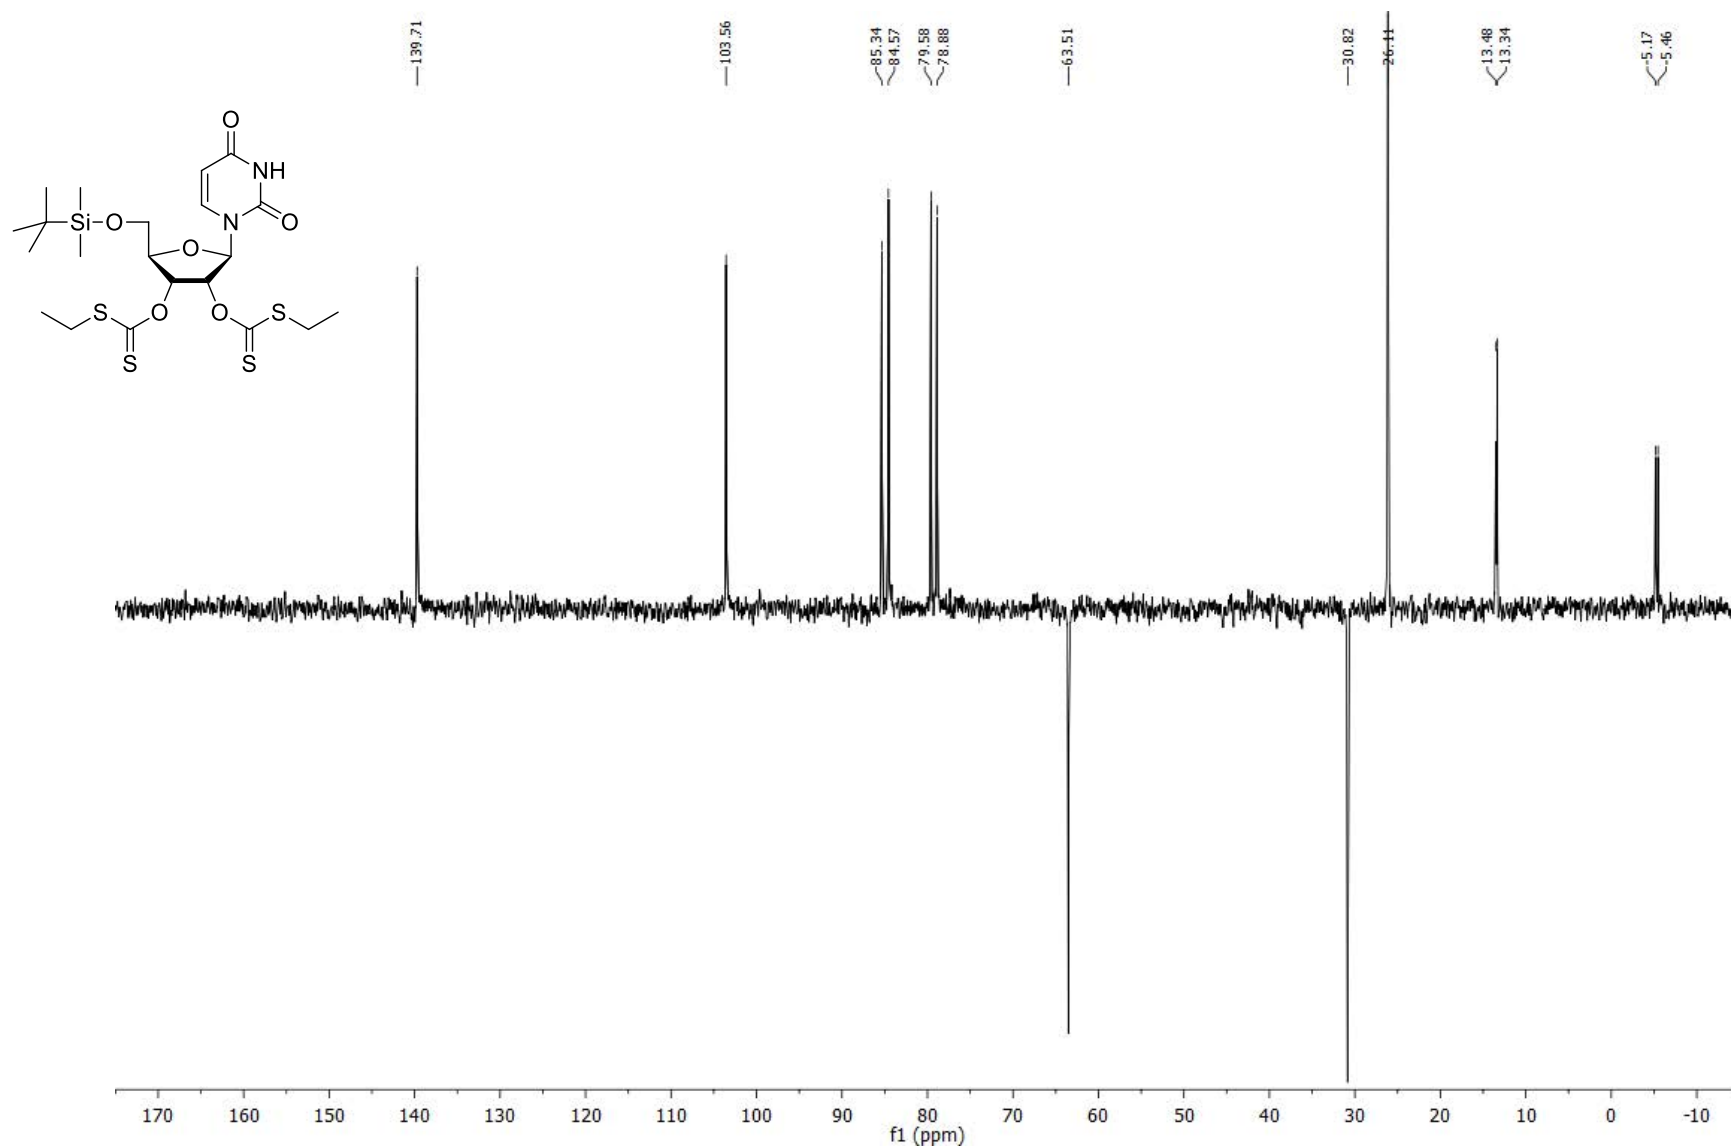

5'-*O*-(*tert*-Butyldimethylsilyl)-2',3'-bis-*O*-[(ethylthio)thiocarbonyl]- $\beta$ -D-uridine (6a)

COSY NMR (CDCl<sub>3</sub>)

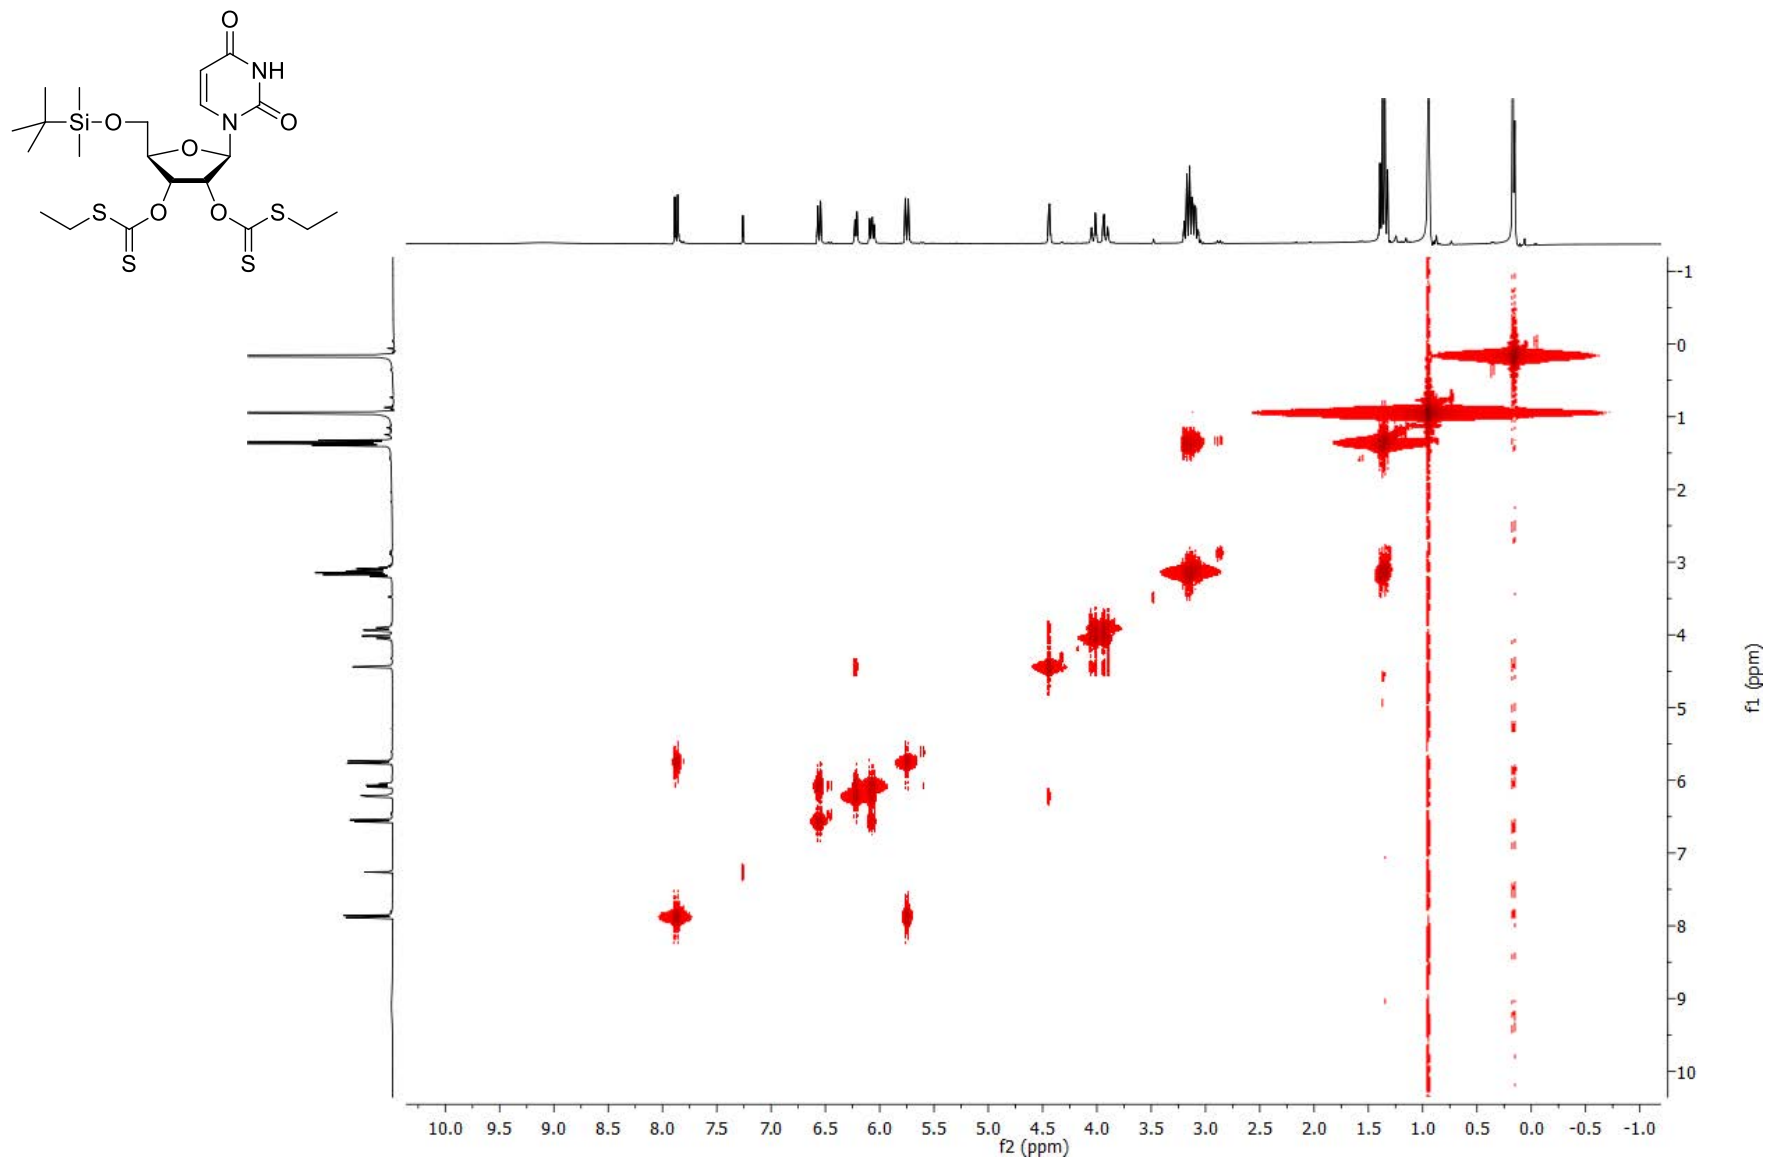

5'-O-(*tert*-Butyldimethylsilyl)-2',3'-bis-O-[(ethylthio)thiocarbonyl]- $\beta$ -D-uridine (6a)

HSQC NMR (CDCl<sub>3</sub>)

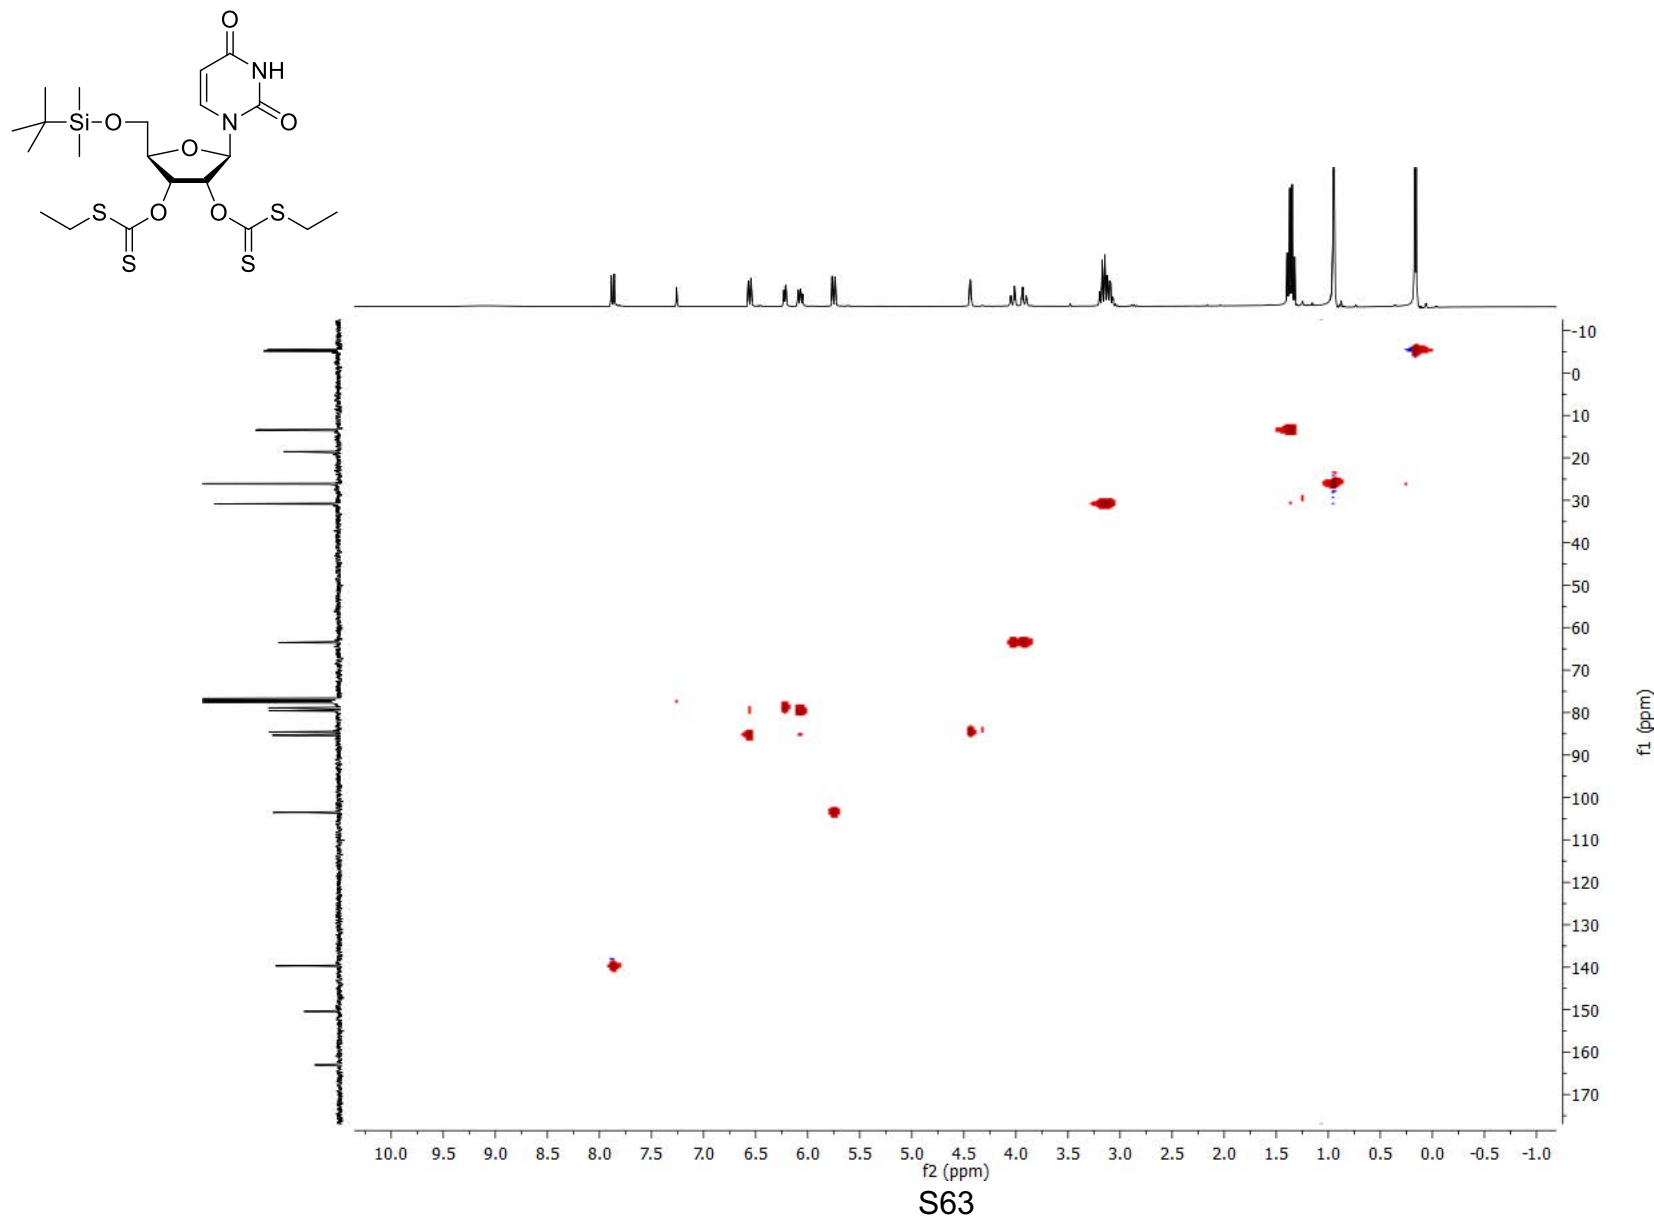

5'-O-(*tert*-Butyldimethylsilyl)-2',3'-bis-*O*-[(ethylthio)thiocarbonyl]- $\beta$ -D-5-methyluridine (6b)

$^1\text{H-NMR}$  (300.13 MHz,  $\text{CDCl}_3$ )

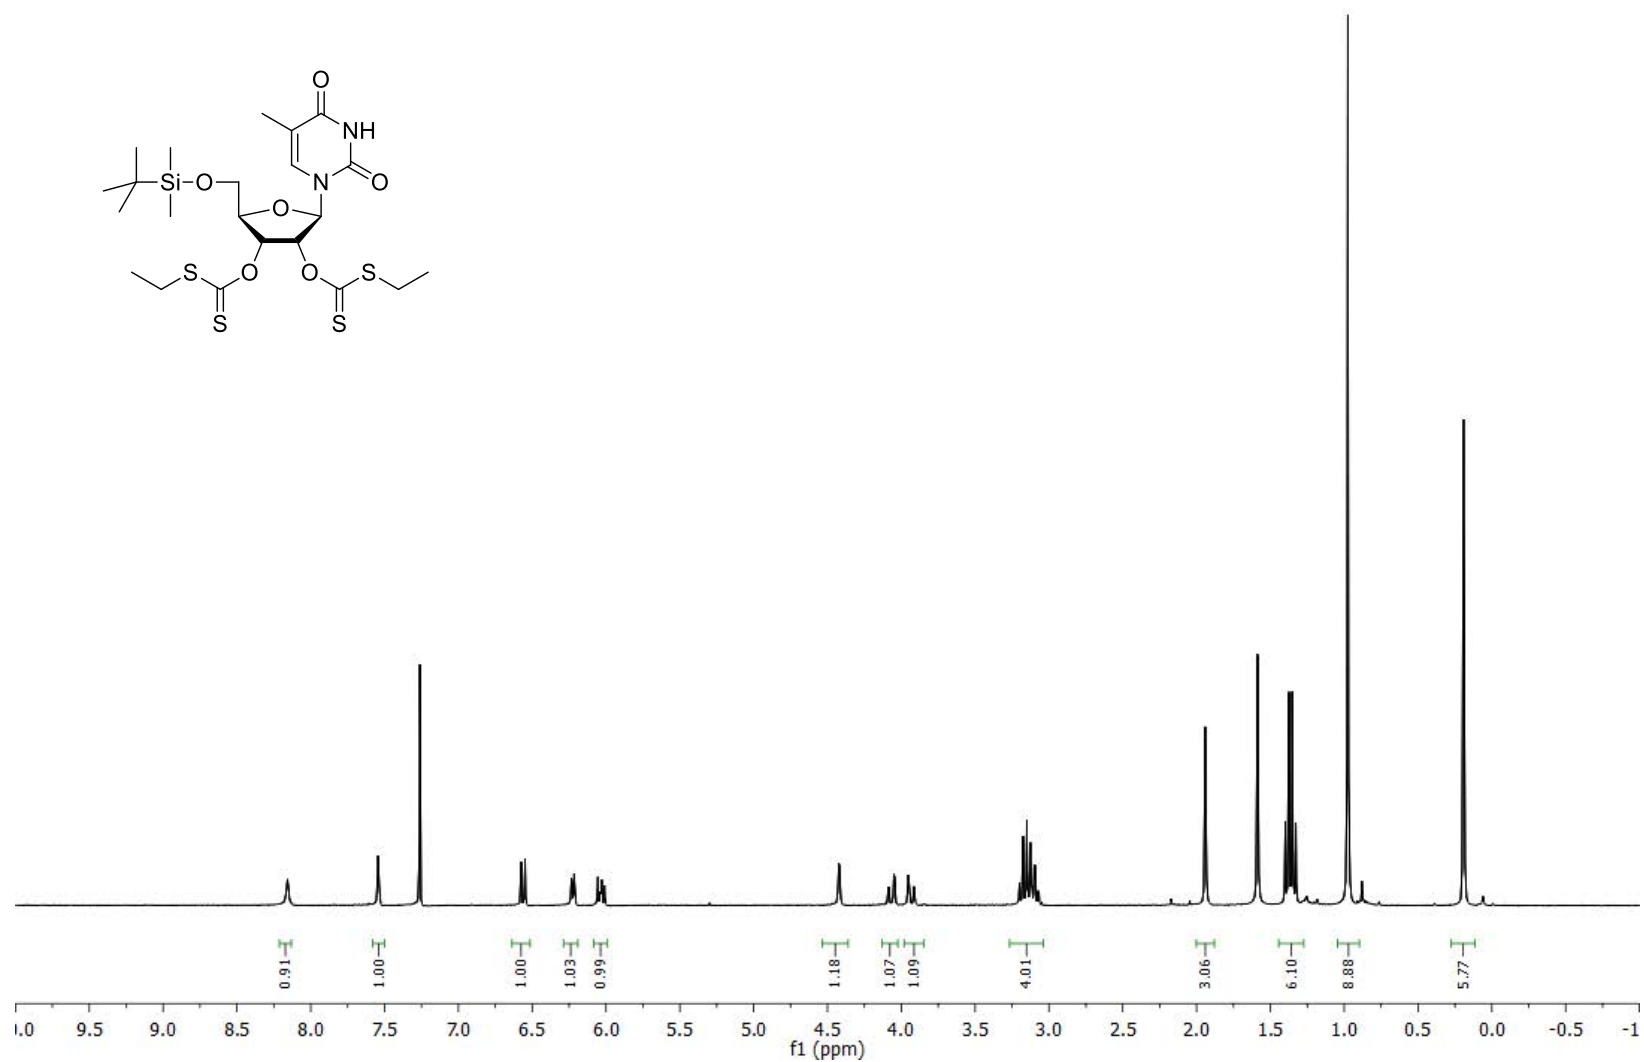



5'-*O*-(*tert*-Butyldimethylsilyl)-2',3'-bis-*O*-[(ethylthio)thiocarbonyl]-β-D-5-methyluridine (6b)

<sup>13</sup>C-NMR (75.5 MHz, CDCl<sub>3</sub>)

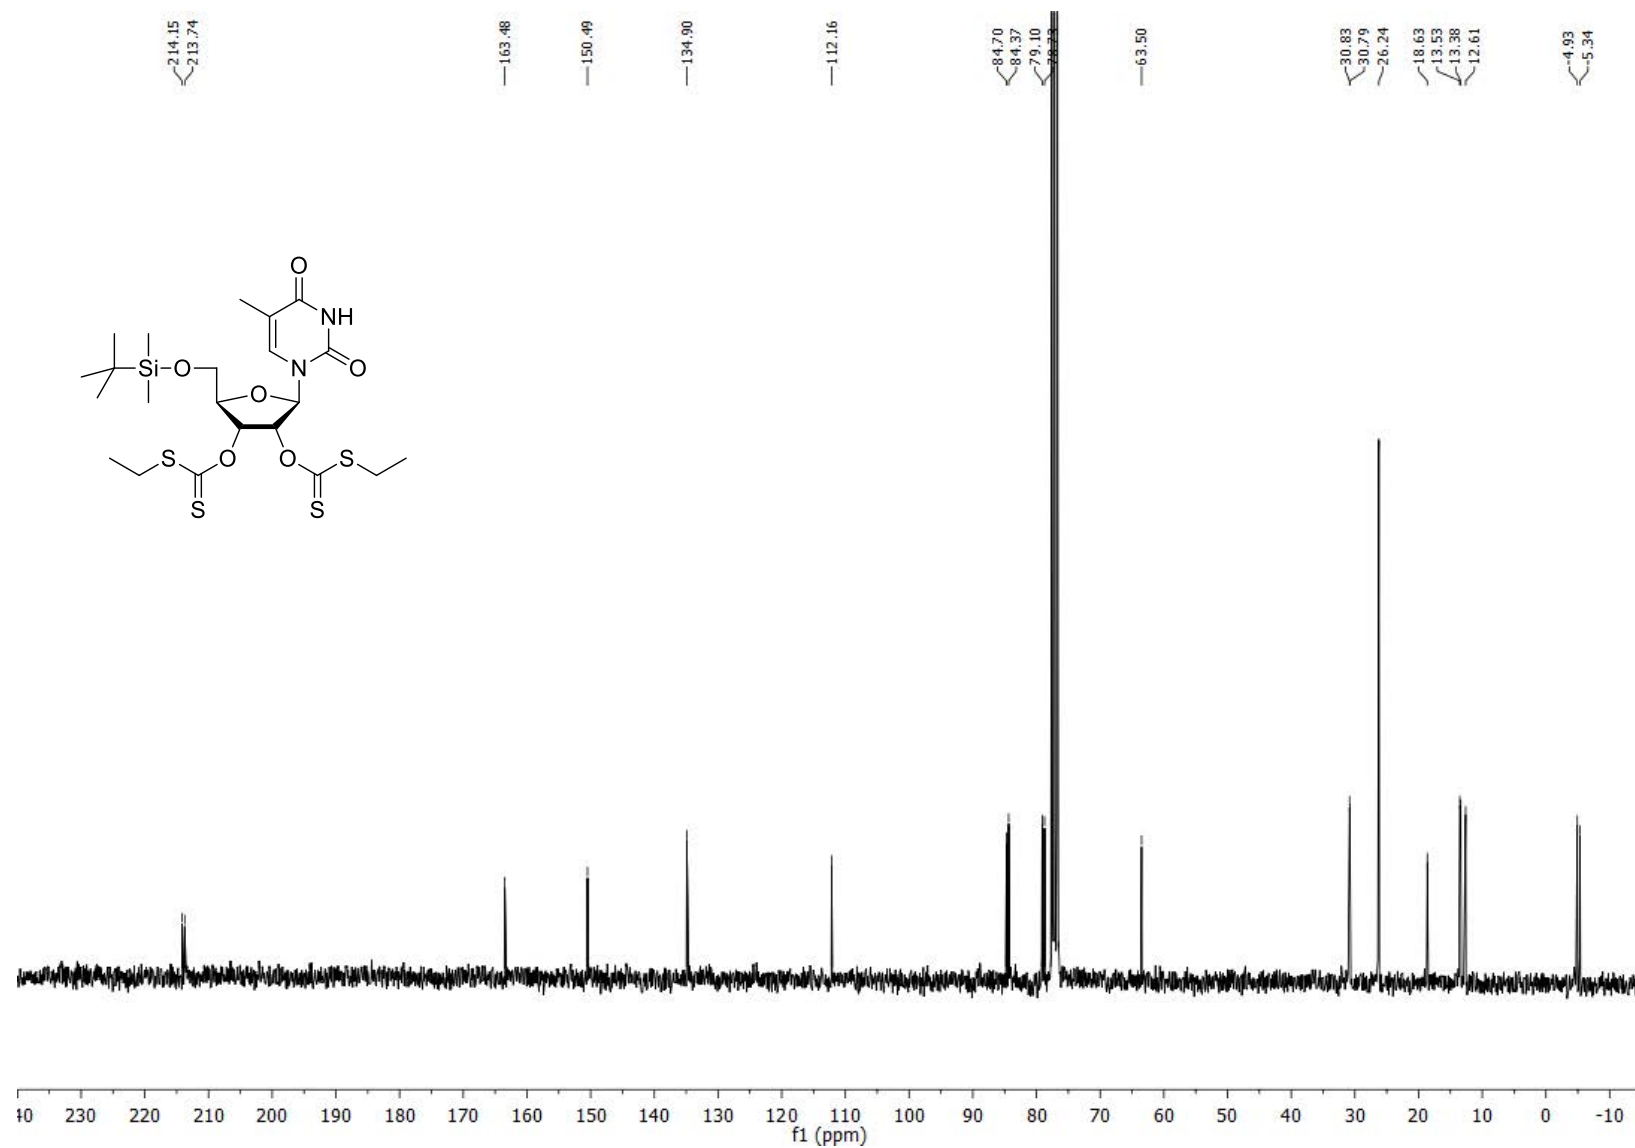

5'-O-(*tert*-Butyldimethylsilyl)-2',3'-bis-O-[(ethylthio)thiocarbonyl]- $\beta$ -D-5-methyluridine (6b)

DEPT NMR (75.5 MHz, CDCl<sub>3</sub>)

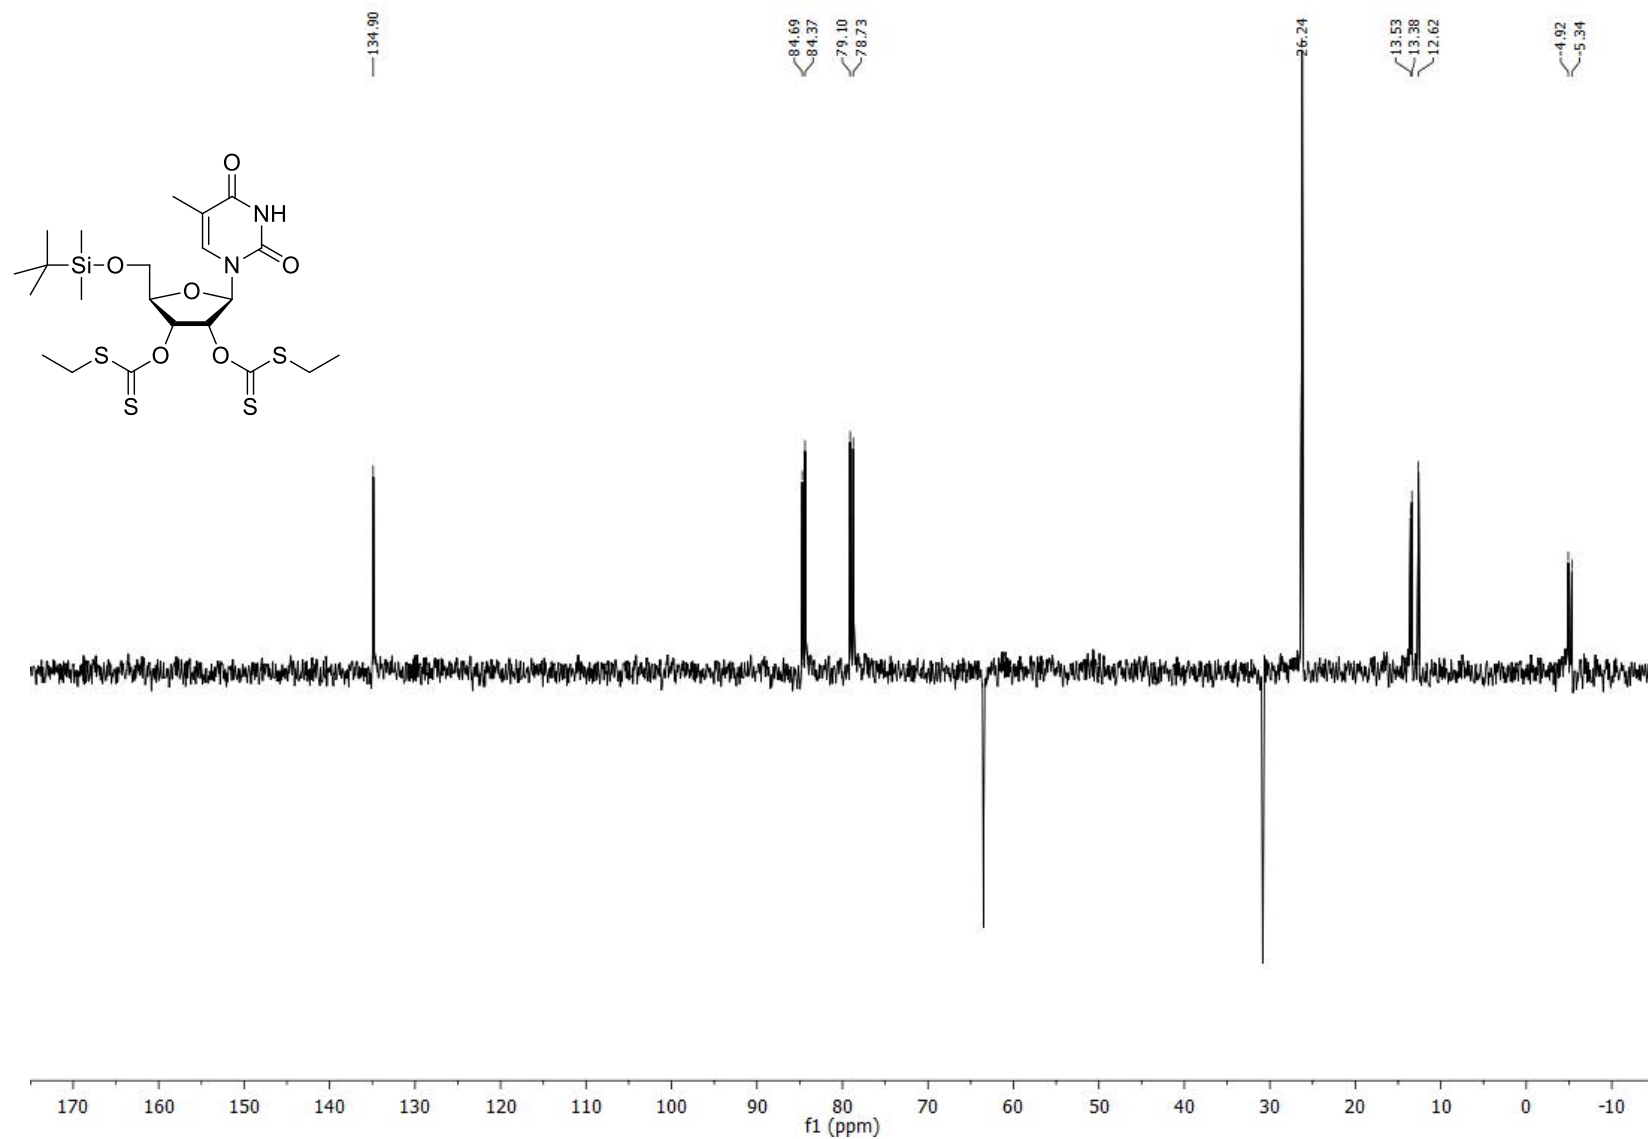

5'-O-(*tert*-Butyldimethylsilyl)-2',3'-bis-O-[(ethylthio)thiocarbonyl]- $\beta$ -D-5-methyluridine (6b)

COSY NMR (CDCl<sub>3</sub>)

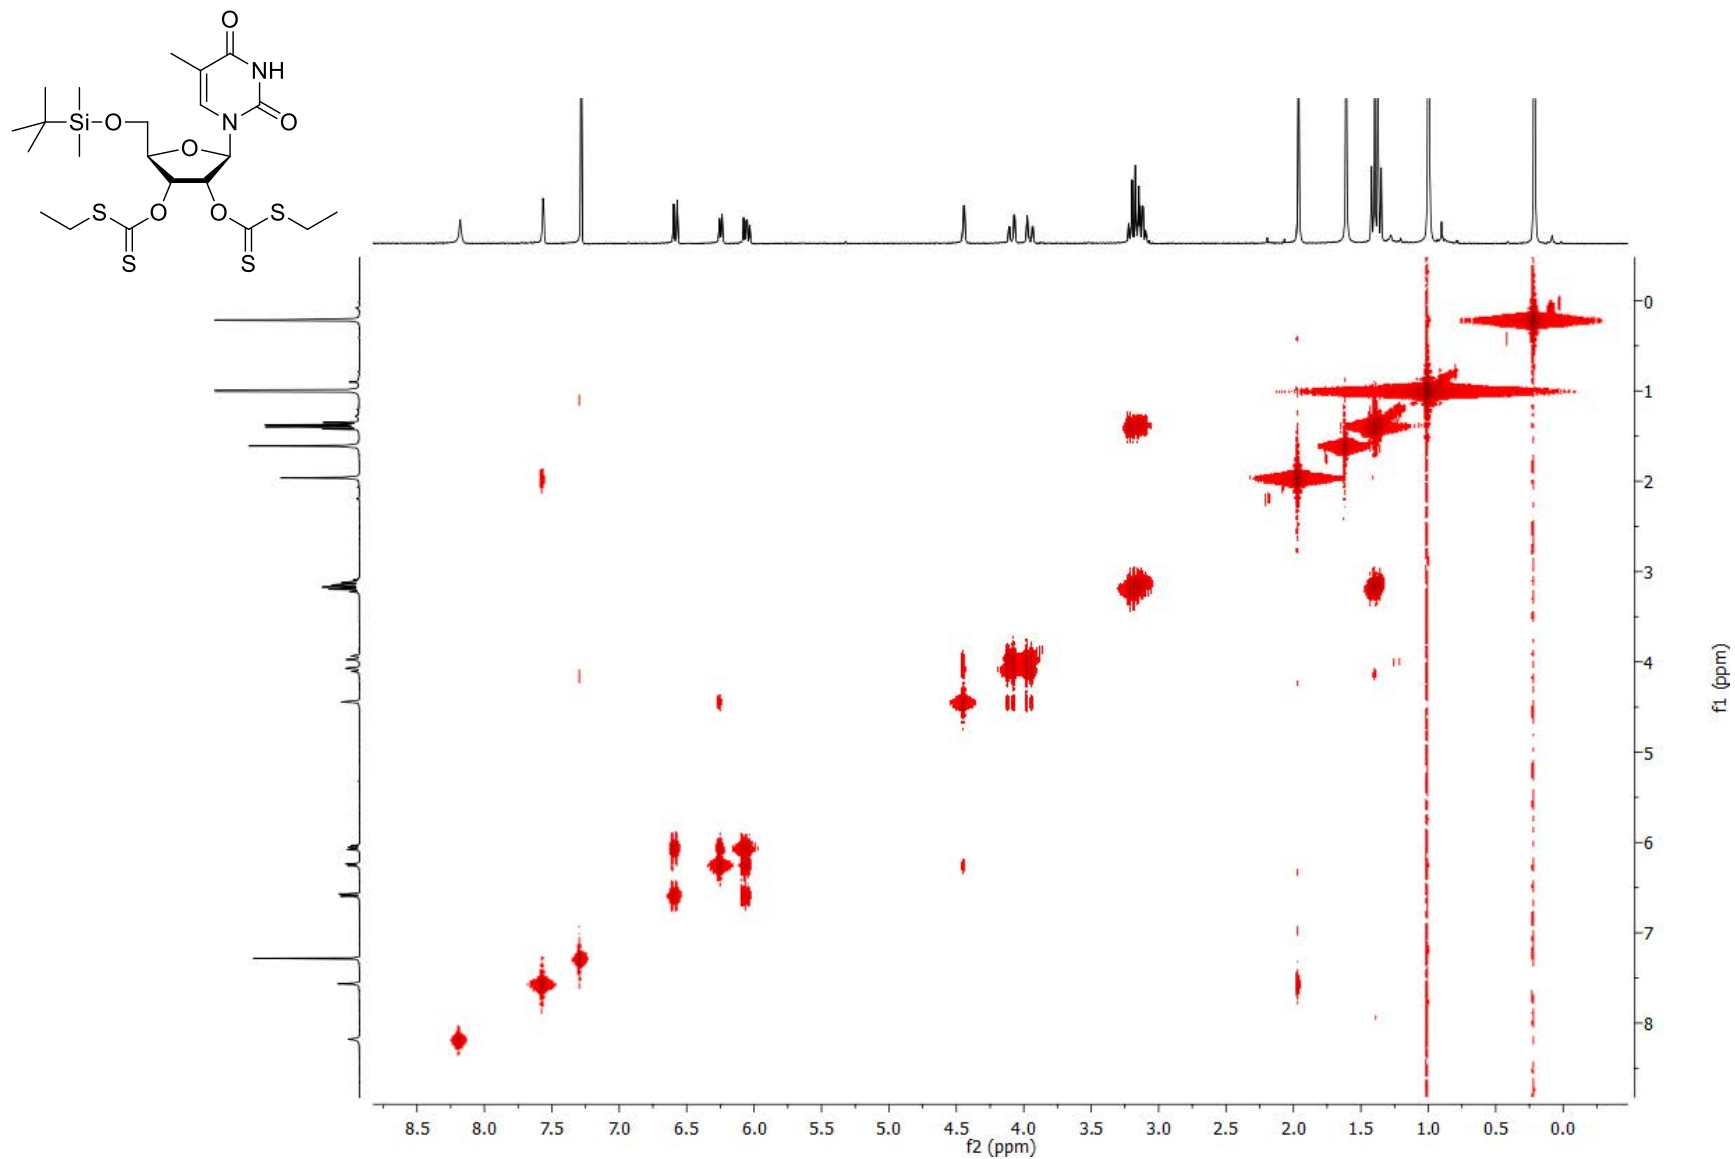

5'-O-(*tert*-Butyldimethylsilyl)-2',3'-bis-O-[(ethylthio)thiocarbonyl]- $\beta$ -D-5-methyluridine (6b)

HSQC NMR (CDCl<sub>3</sub>)

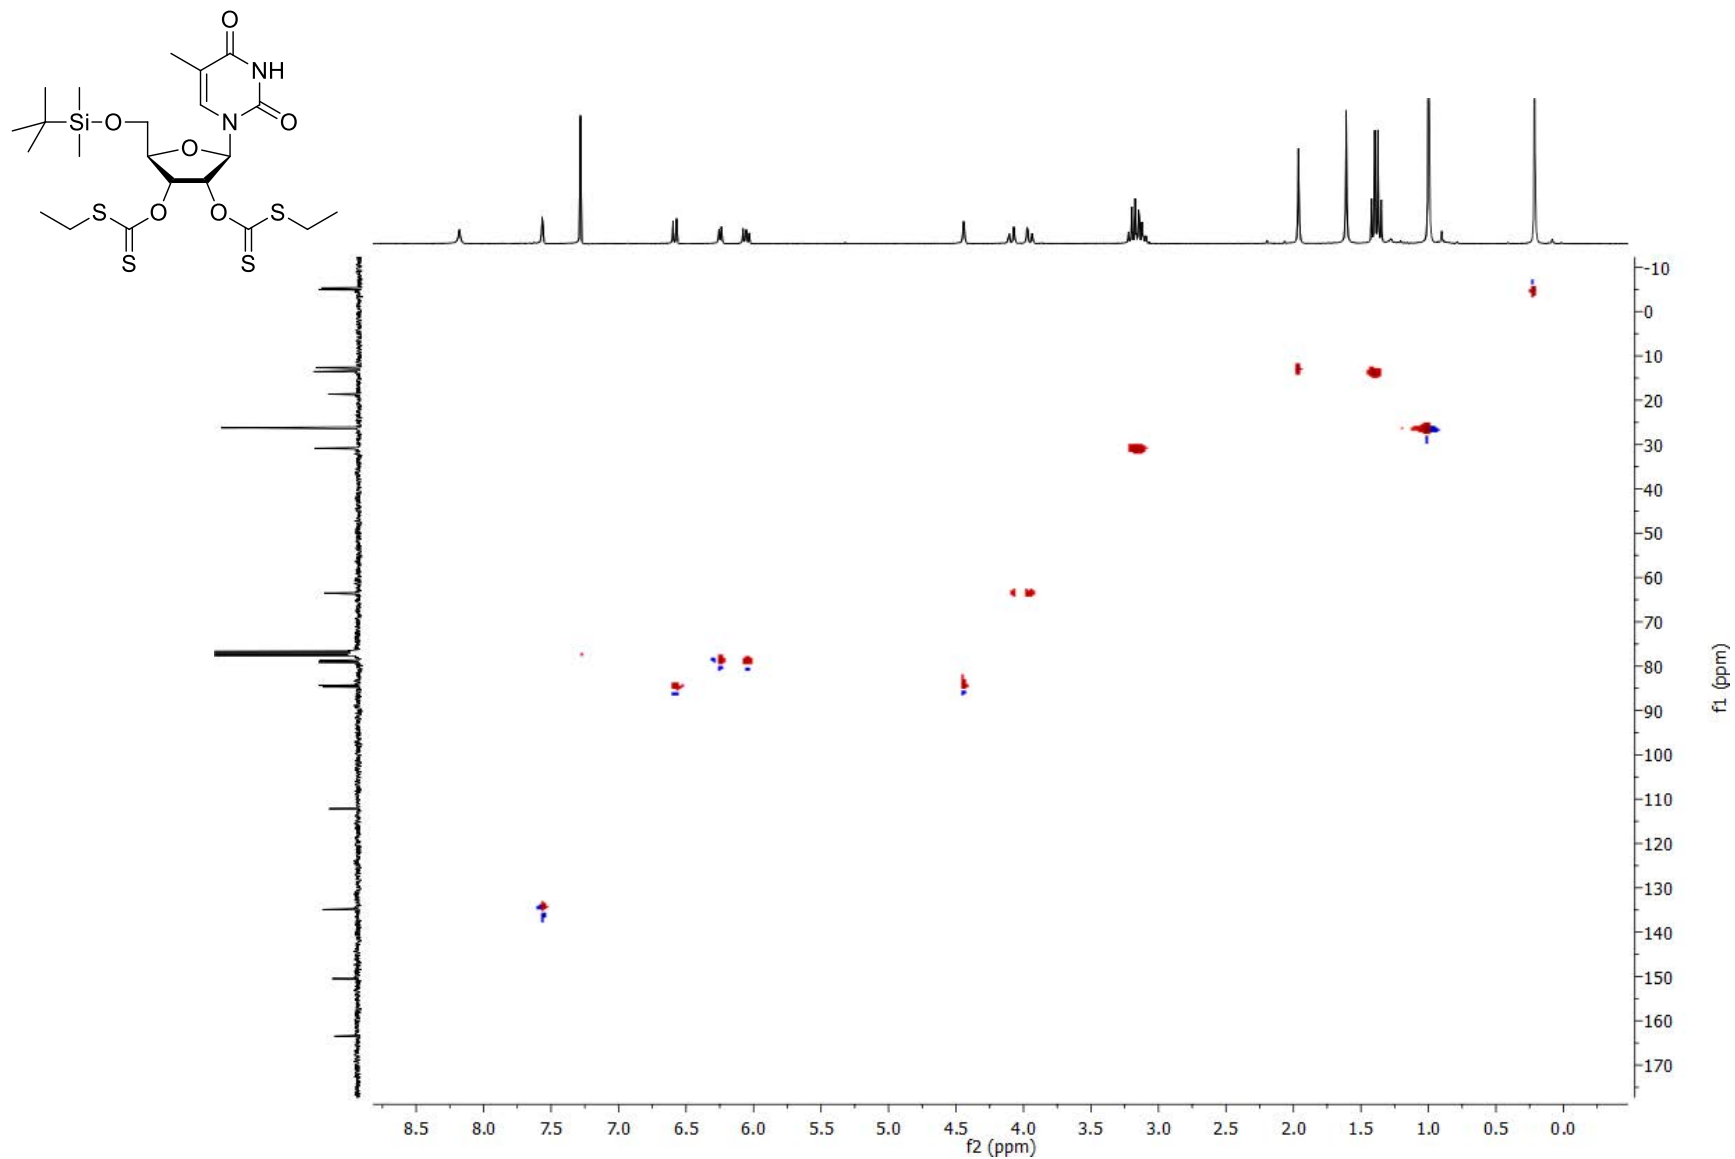

**5'-*O*-(*tert*-Butyldimethylsilyl)-2',3'-bis-*O*-[(ethylthio)thiocarbonyl]- $\beta$ -D-cytidine (6c)**

$^1\text{H-NMR}$  (300.13 MHz,  $\text{CDCl}_3$ )

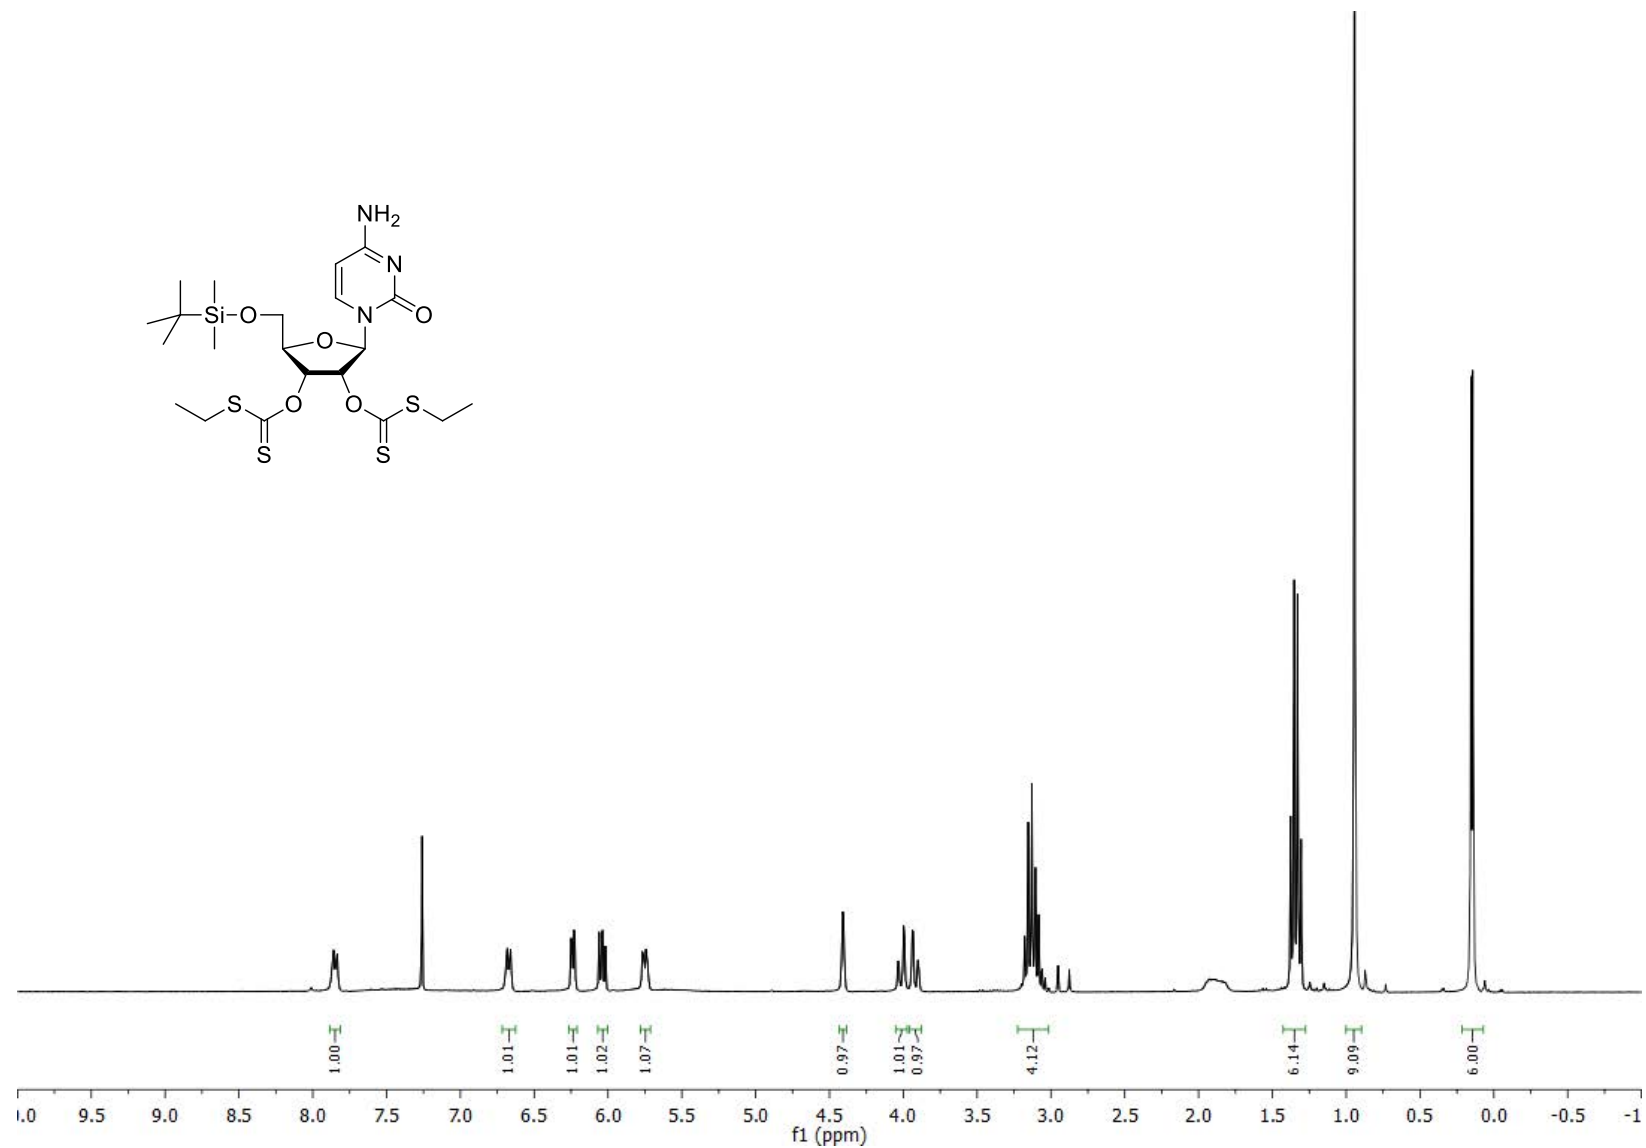

**5'-O-(*tert*-Butyldimethylsilyl)-2',3'-bis-O-[(ethylthio)thiocarbonyl]- $\beta$ -D-cytidine (6c)**

$^{13}\text{C}$ -NMR (75.5 MHz,  $\text{CDCl}_3$ )

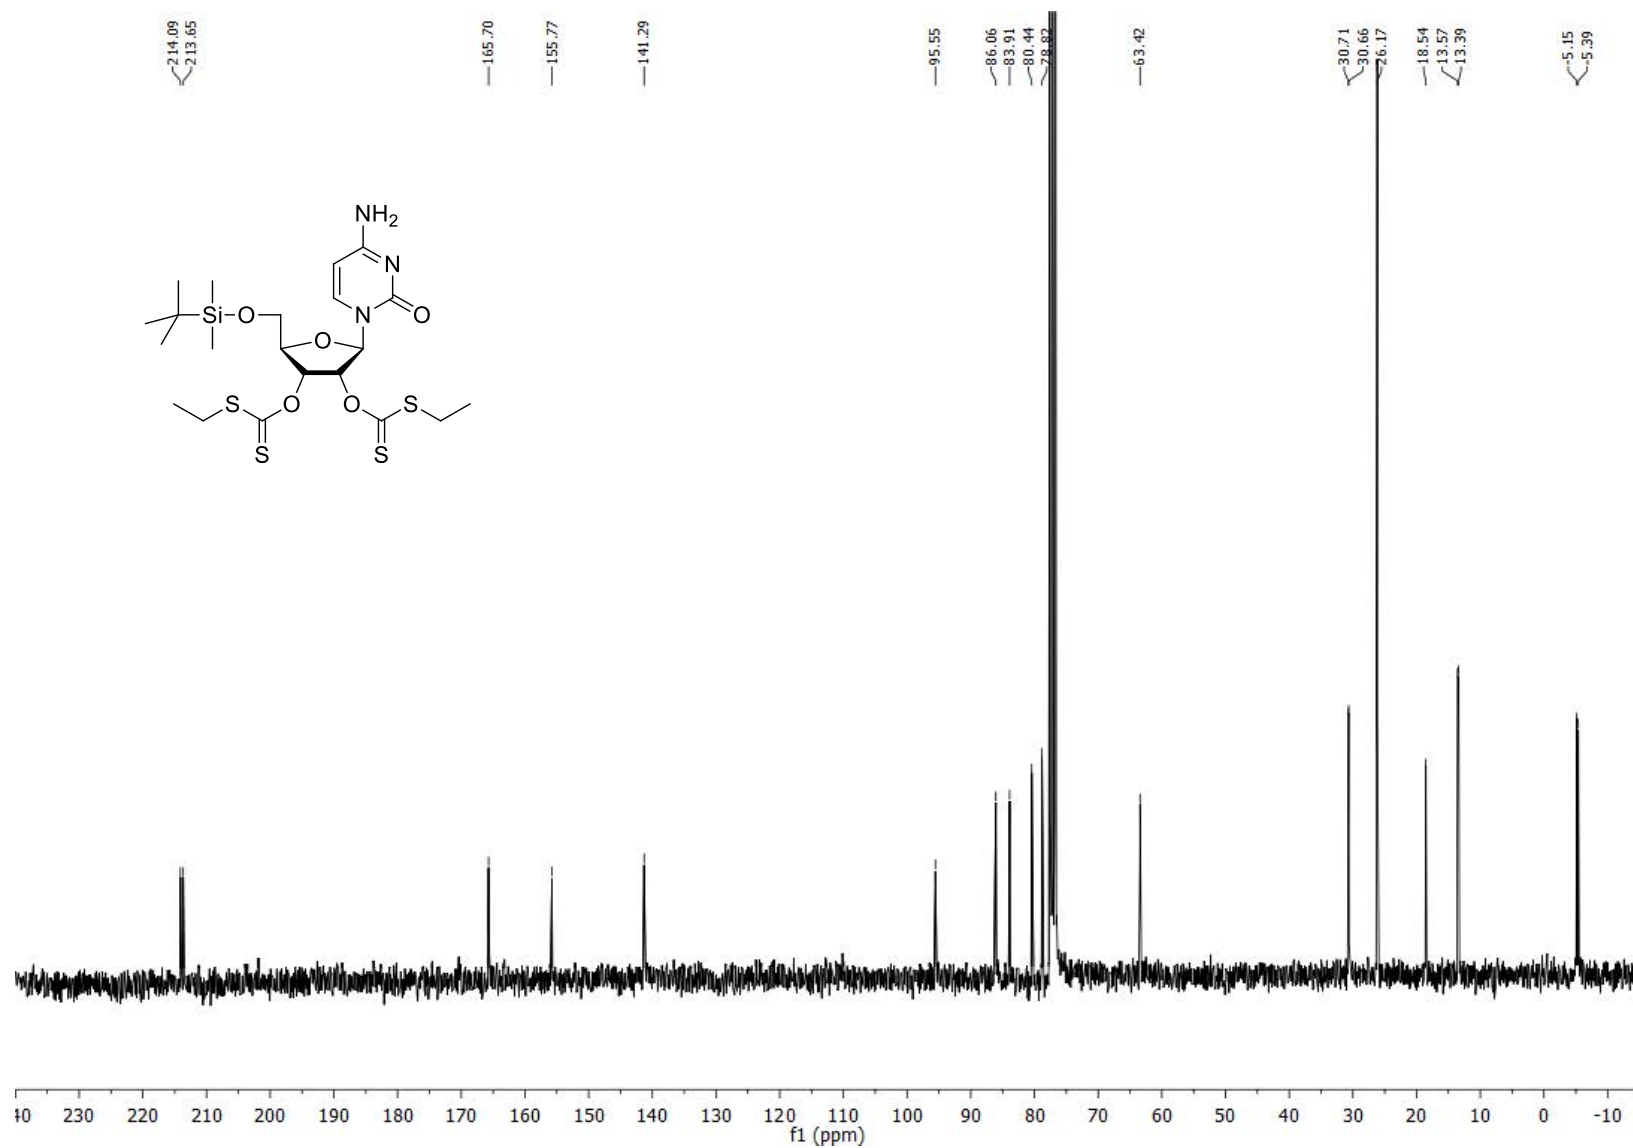

**5'-O-(*tert*-Butyldimethylsilyl)-2',3'-bis-O-[(ethylthio)thiocarbonyl]- $\beta$ -D-cytidine (6c)**

DEPT NMR (75.5 MHz, CDCl<sub>3</sub>)

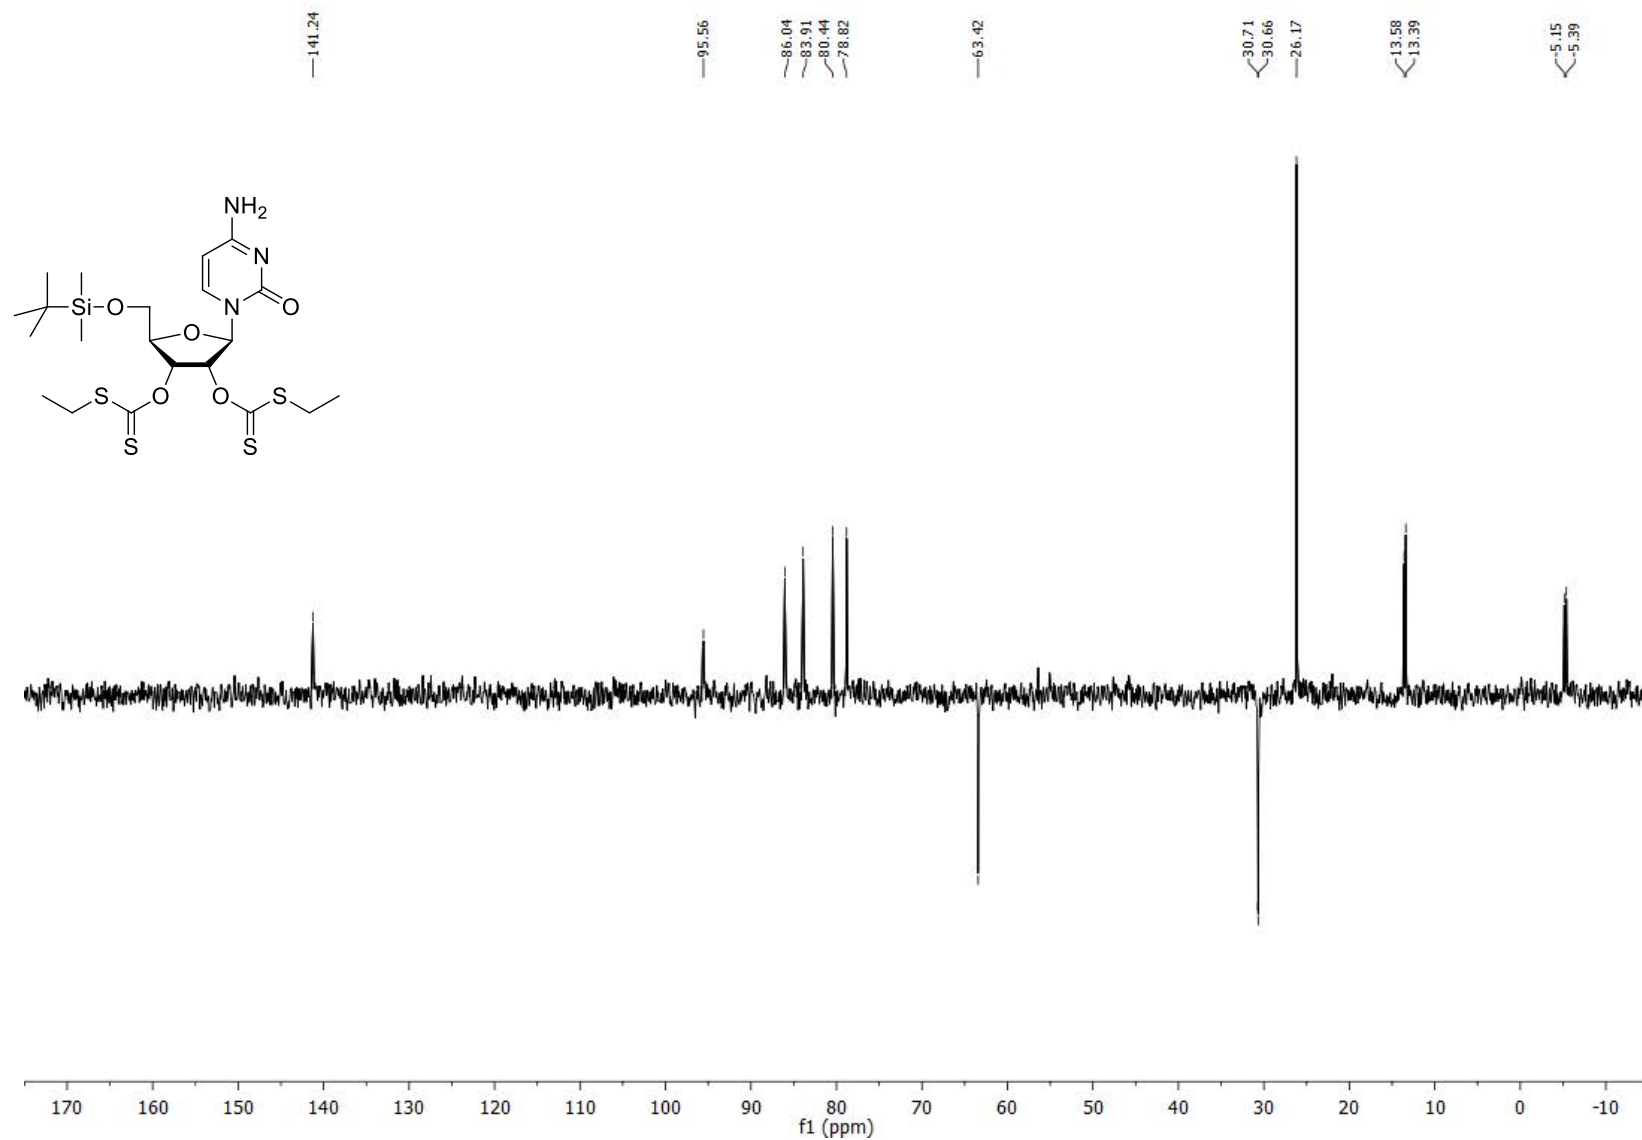

**5'-*O*-(*tert*-Butyldimethylsilyl)-2',3'-bis-*O*-[(ethylthio)thiocarbonyl]- $\beta$ -D-cytidine (6c)**

COSY NMR (CDCl<sub>3</sub>)

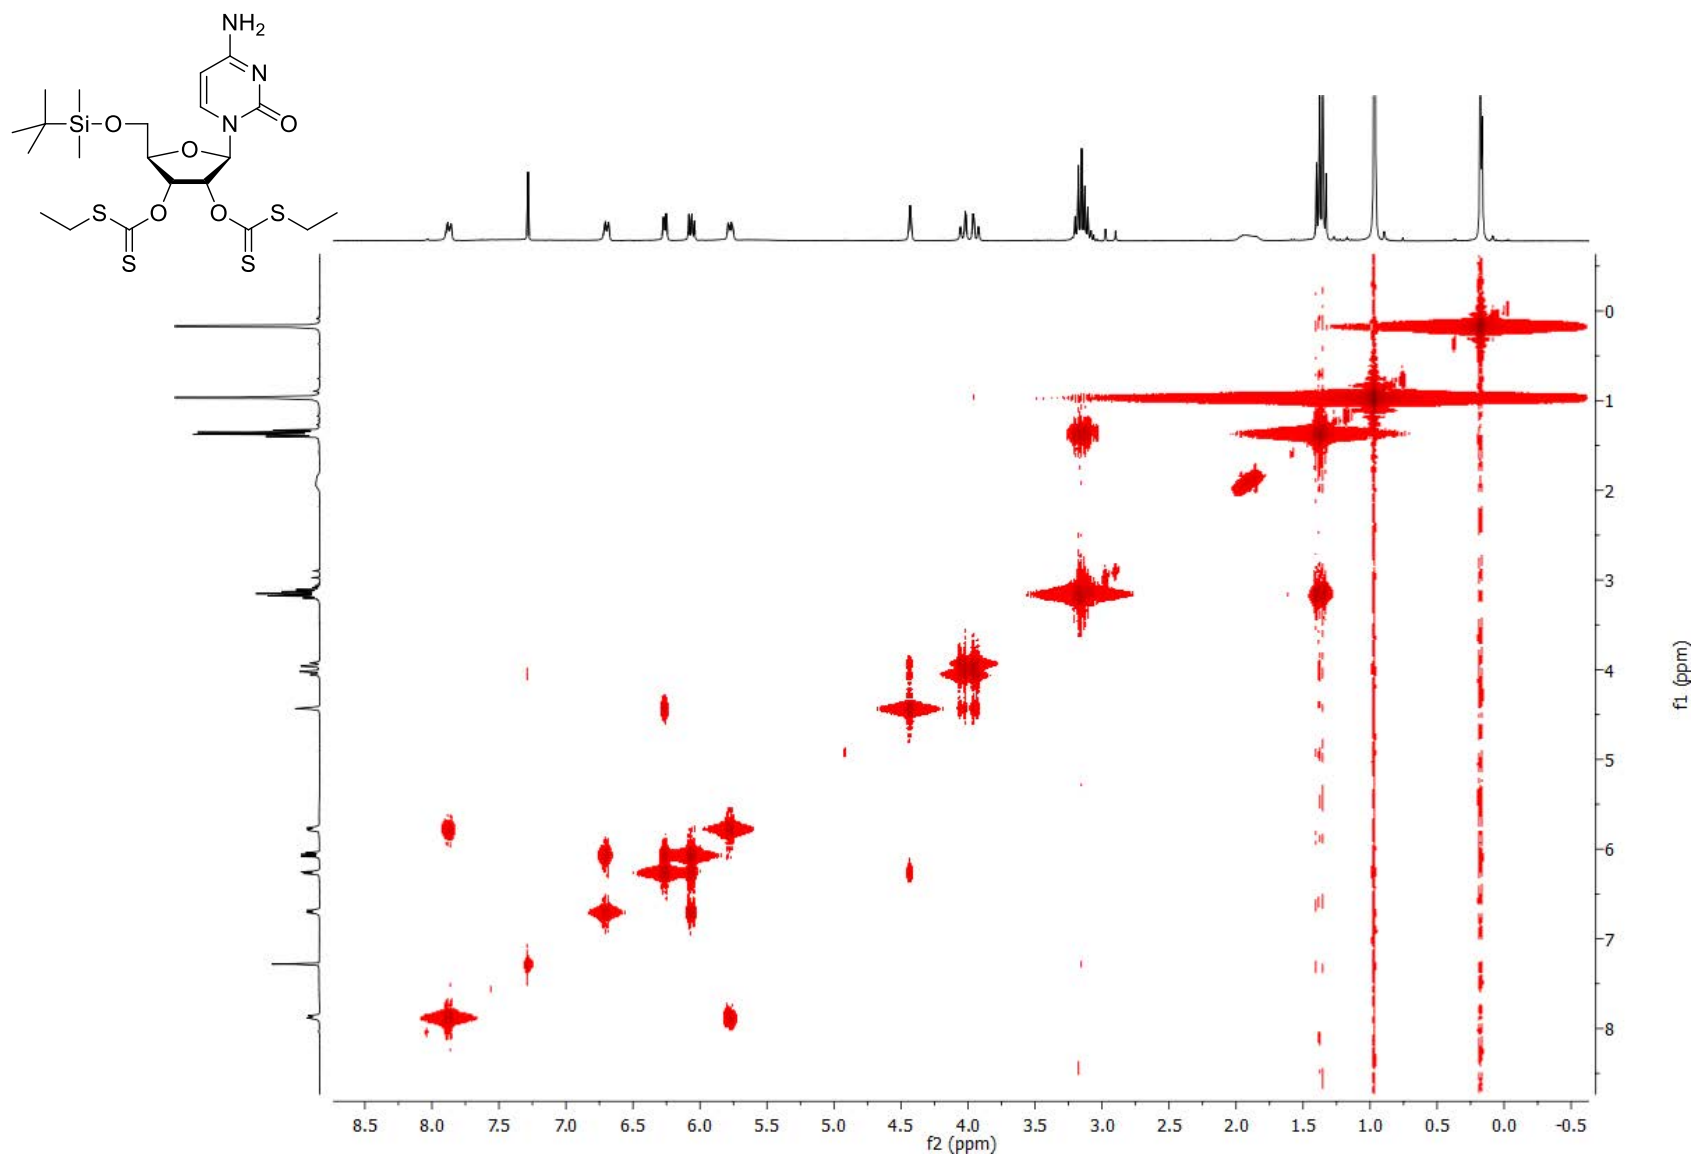



5'-*O*-(*tert*-Butyldimethylsilyl)-2',3'-bis-*O*-[(ethylthio)thiocarbonyl]- $\beta$ -D-cytidine (6c)

HSQC NMR (CDCl<sub>3</sub>)

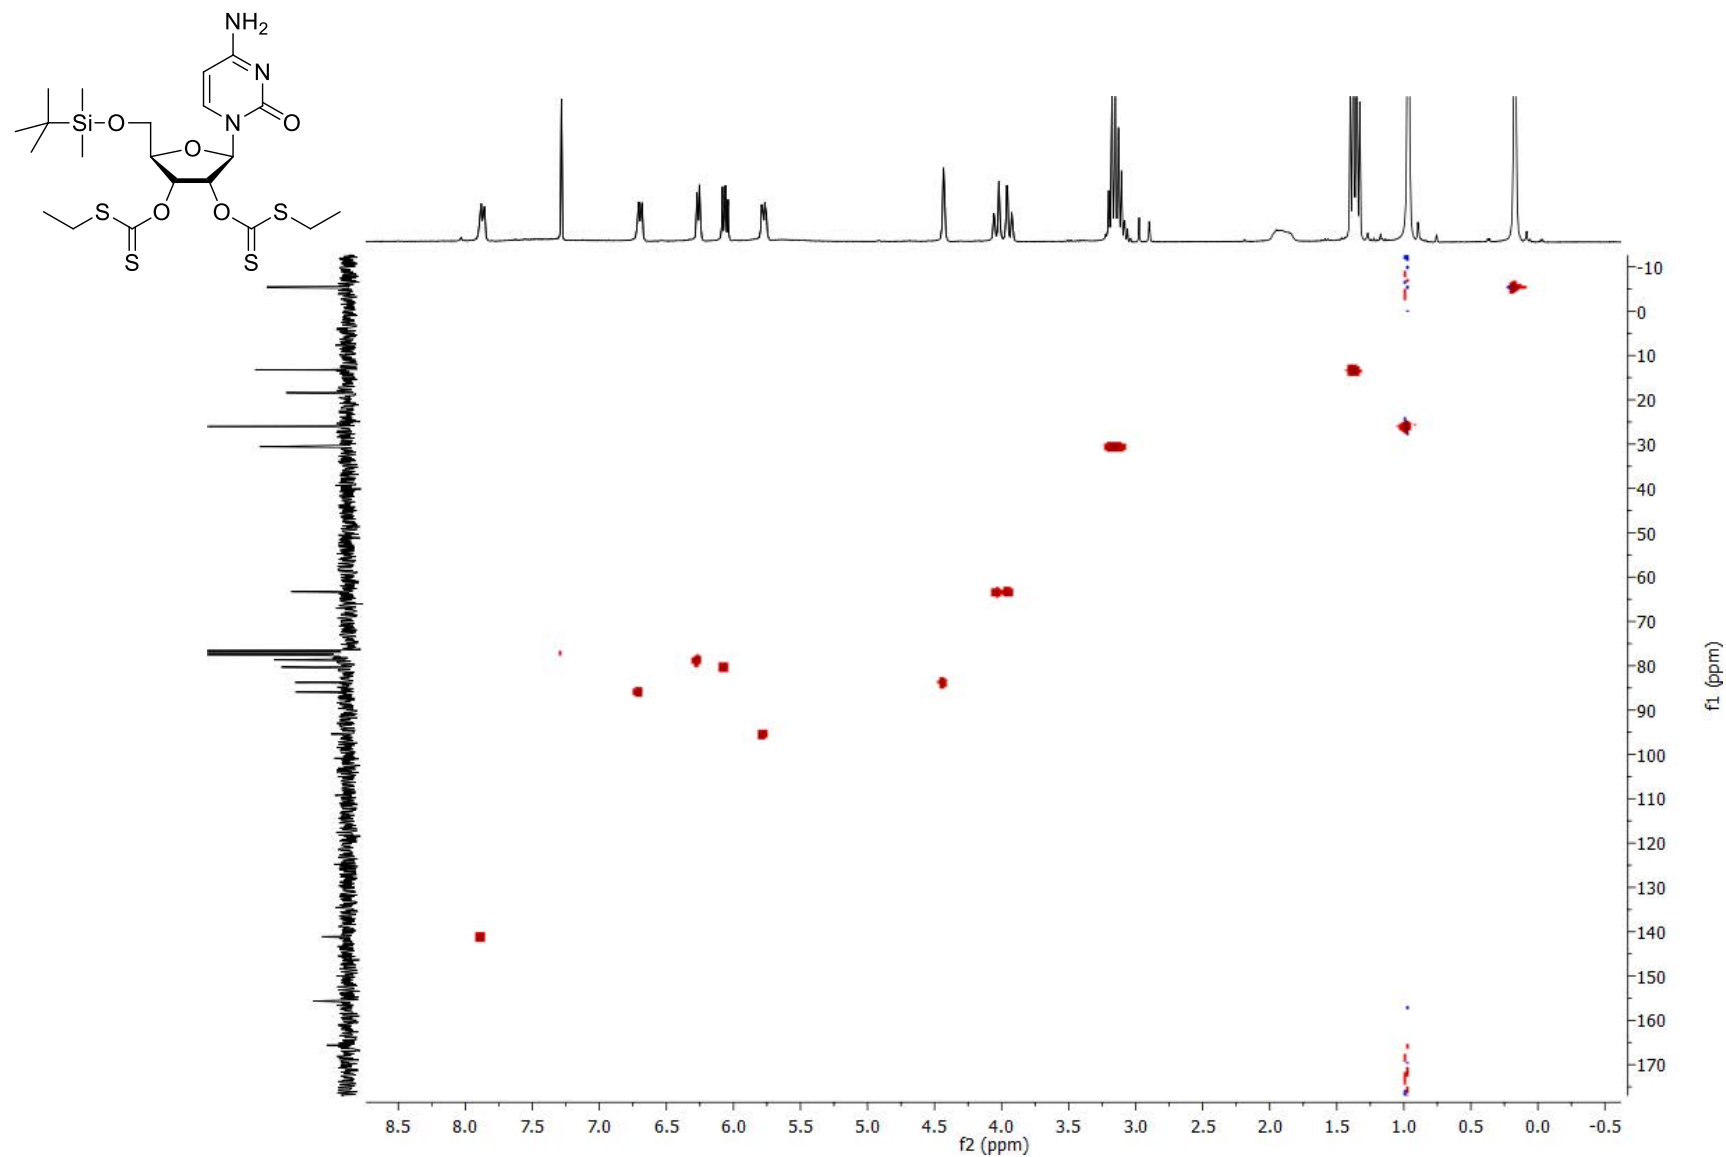

***N*<sup>4</sup>-Benzoyl-5'-*O*-(*tert*-butyldimethylsilyl)-2',3'-bis-*O*-[(ethylthio)thiocarbonyl]-β-D-cytidine (6d)**

<sup>1</sup>H-NMR (300.13 MHz, CDCl<sub>3</sub>)

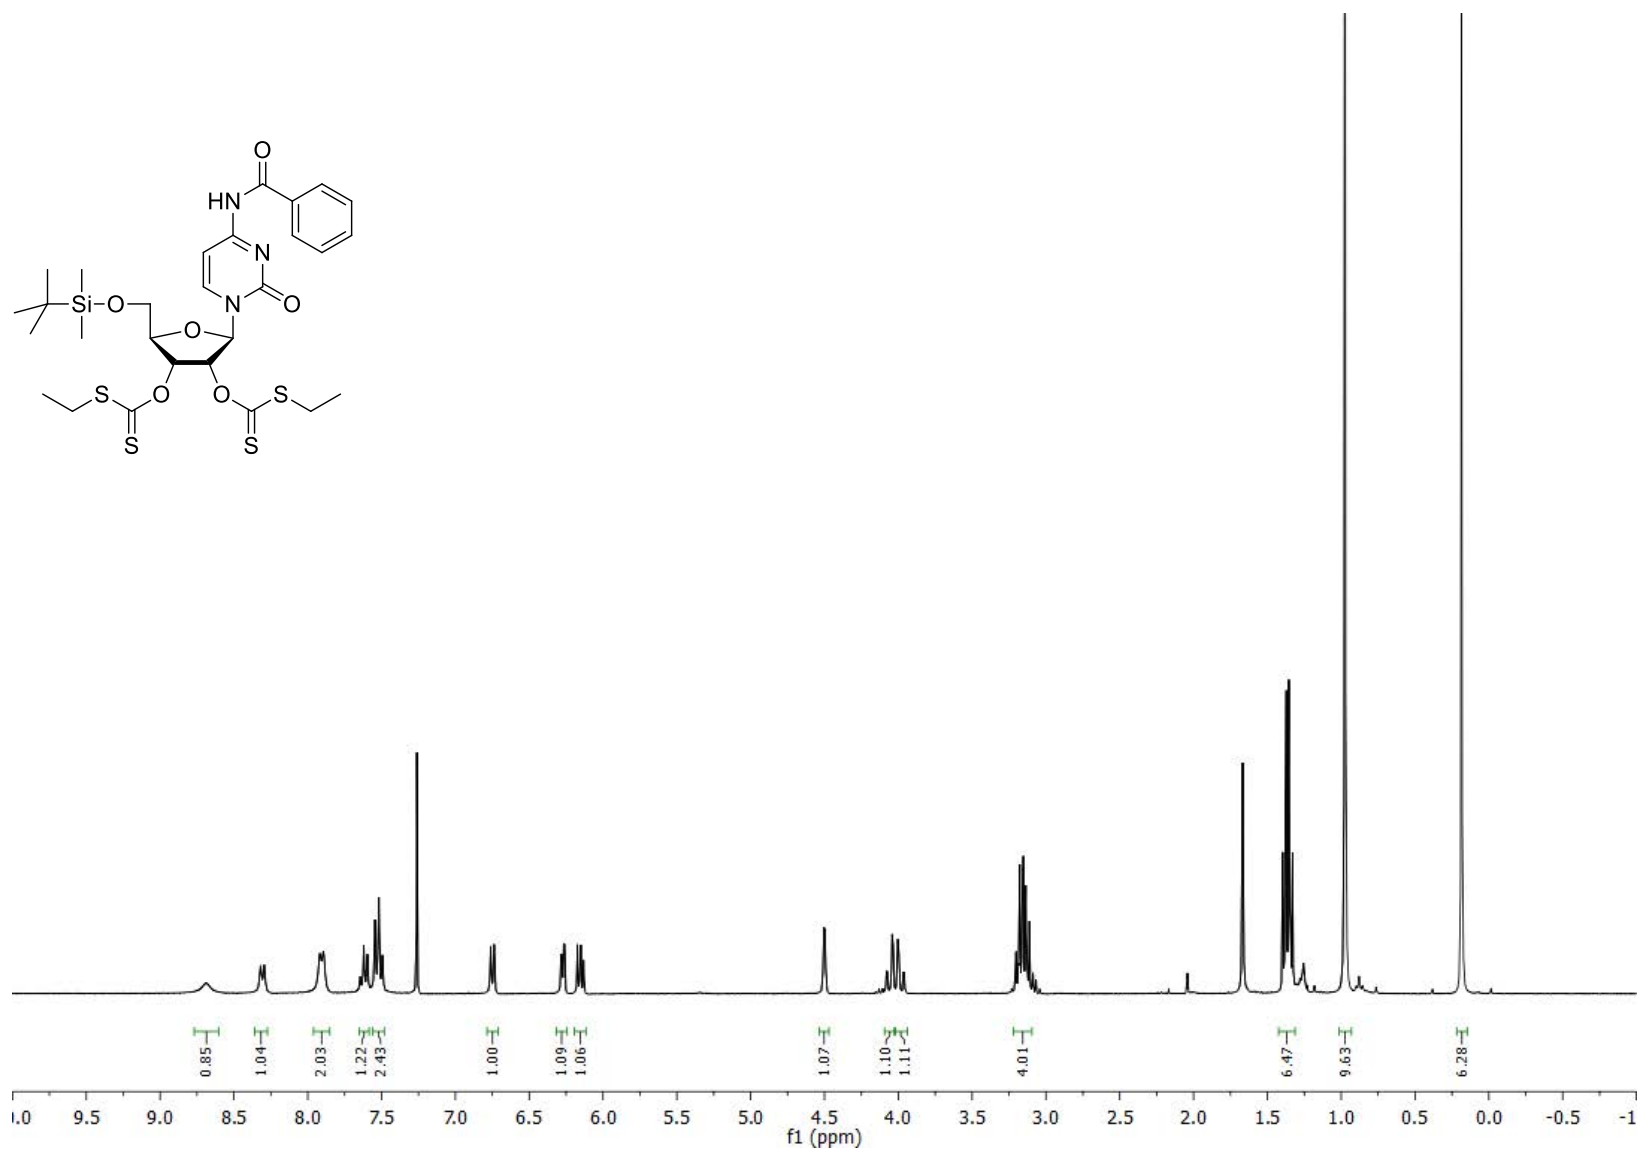

***N*<sup>4</sup>-Benzoyl-5'-*O*-(*tert*-butyldimethylsilyl)-2',3'-bis-*O*-[(ethylthio)thiocarbonyl]- $\beta$ -D-cytidine (6d)**

<sup>13</sup>C-NMR (75.5 MHz, CDCl<sub>3</sub>)

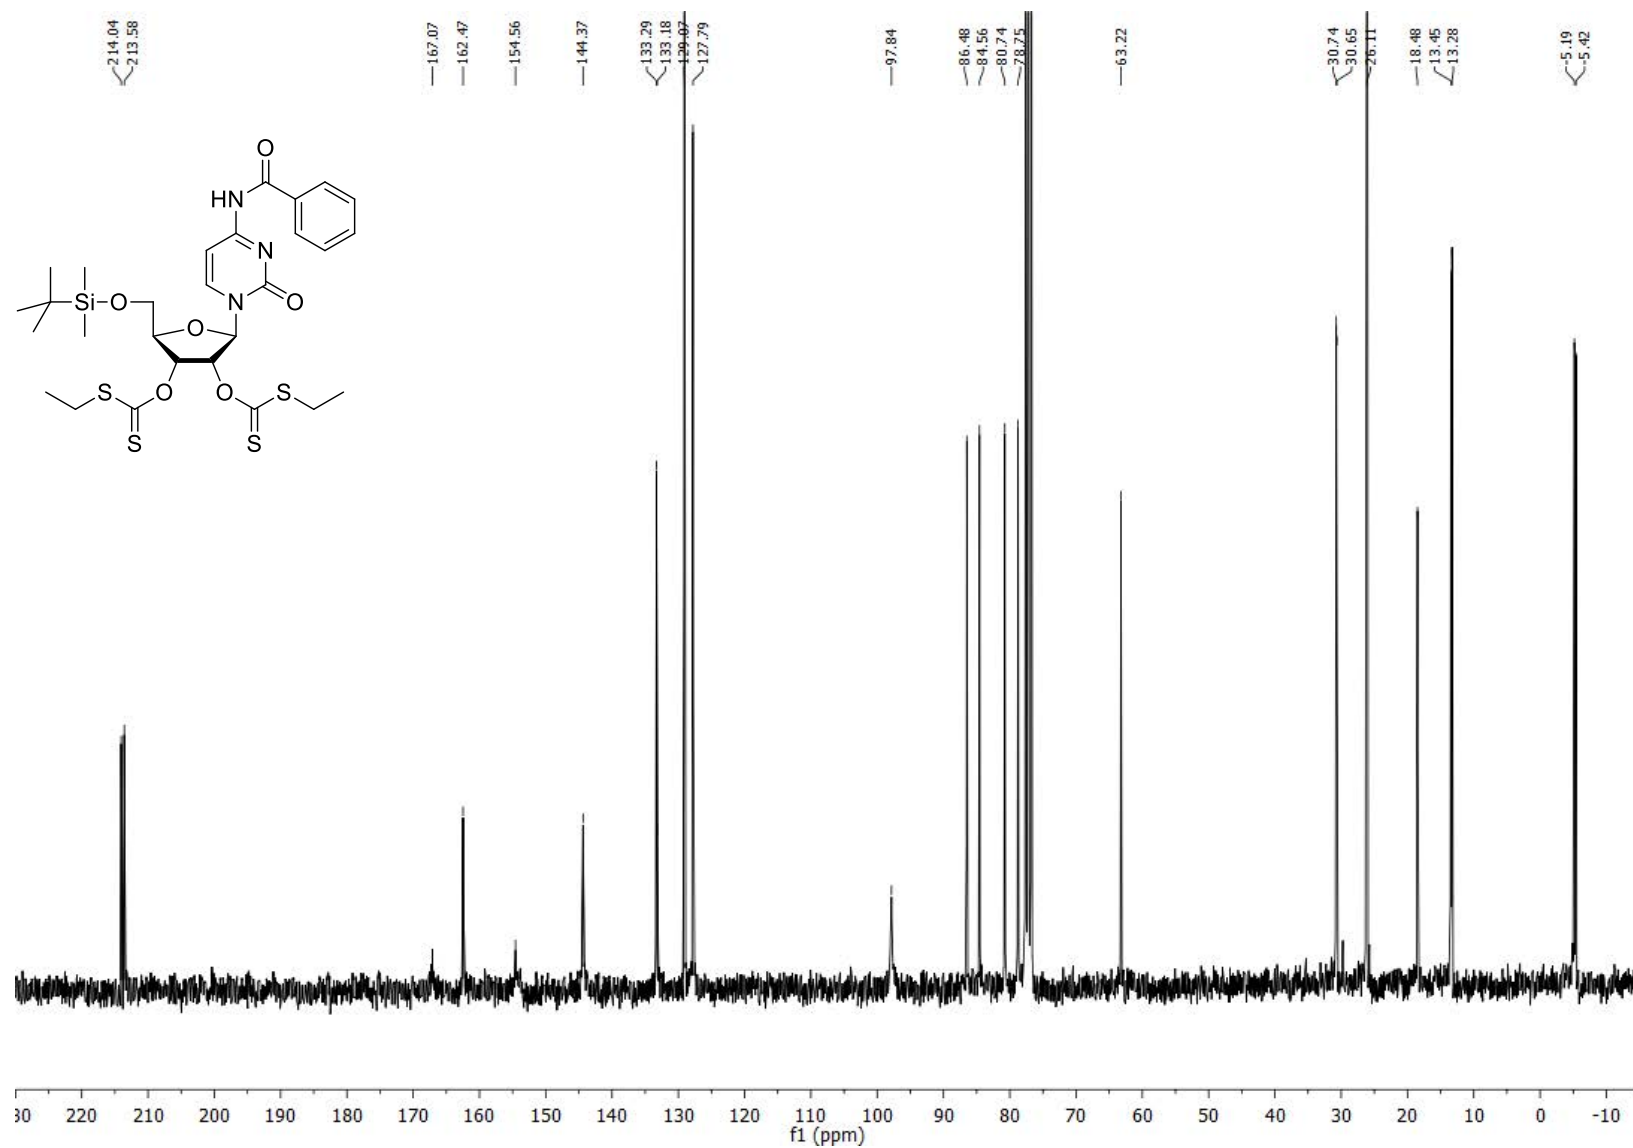

***N*<sup>4</sup>-Benzoyl-5'-*O*-(*tert*-butyldimethylsilyl)-2',3'-bis-*O*-[(ethylthio)thiocarbonyl]-β-D-cytidine (6d)**

DEPT NMR (75.5 MHz, CDCl<sub>3</sub>)

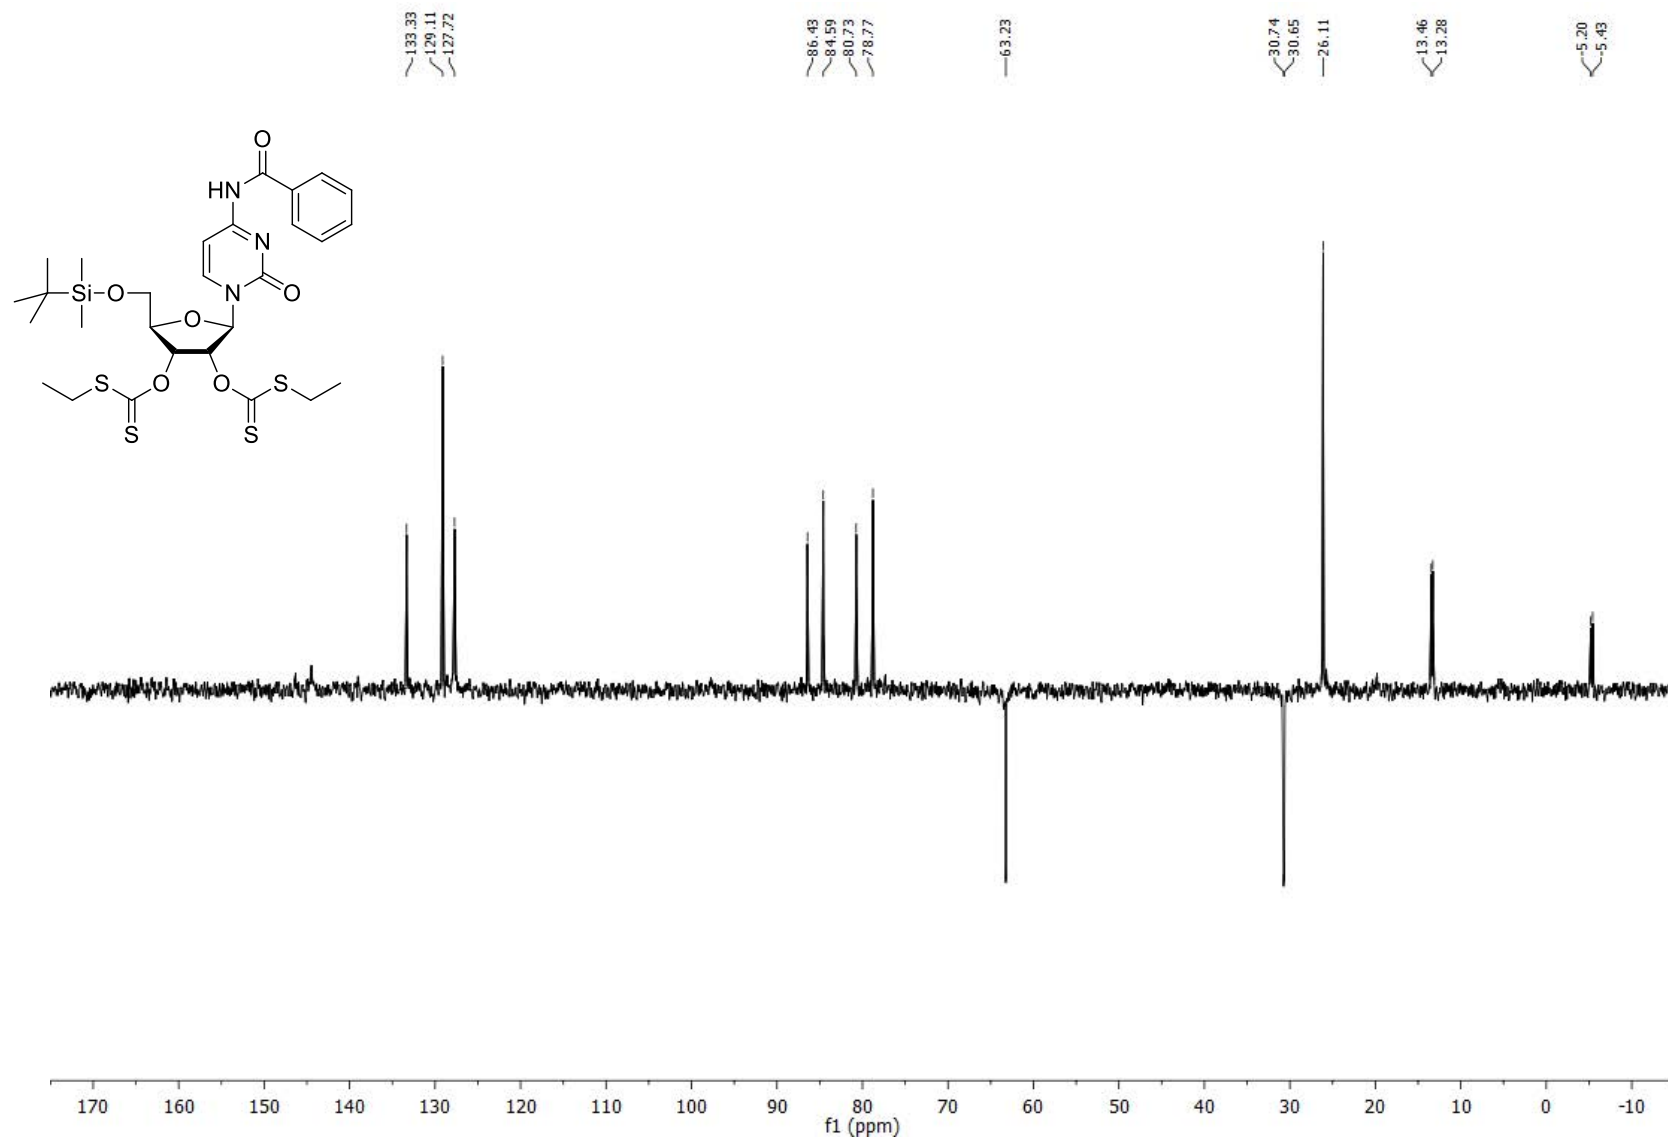

***N*<sup>4</sup>-Benzoyl-5'-*O*-(*tert*-butyldimethylsilyl)-2',3'-bis-*O*-[(ethylthio)thiocarbonyl]-β-D-cytidine (6d)**

COSY NMR (75.5 MHz, CDCl<sub>3</sub>)

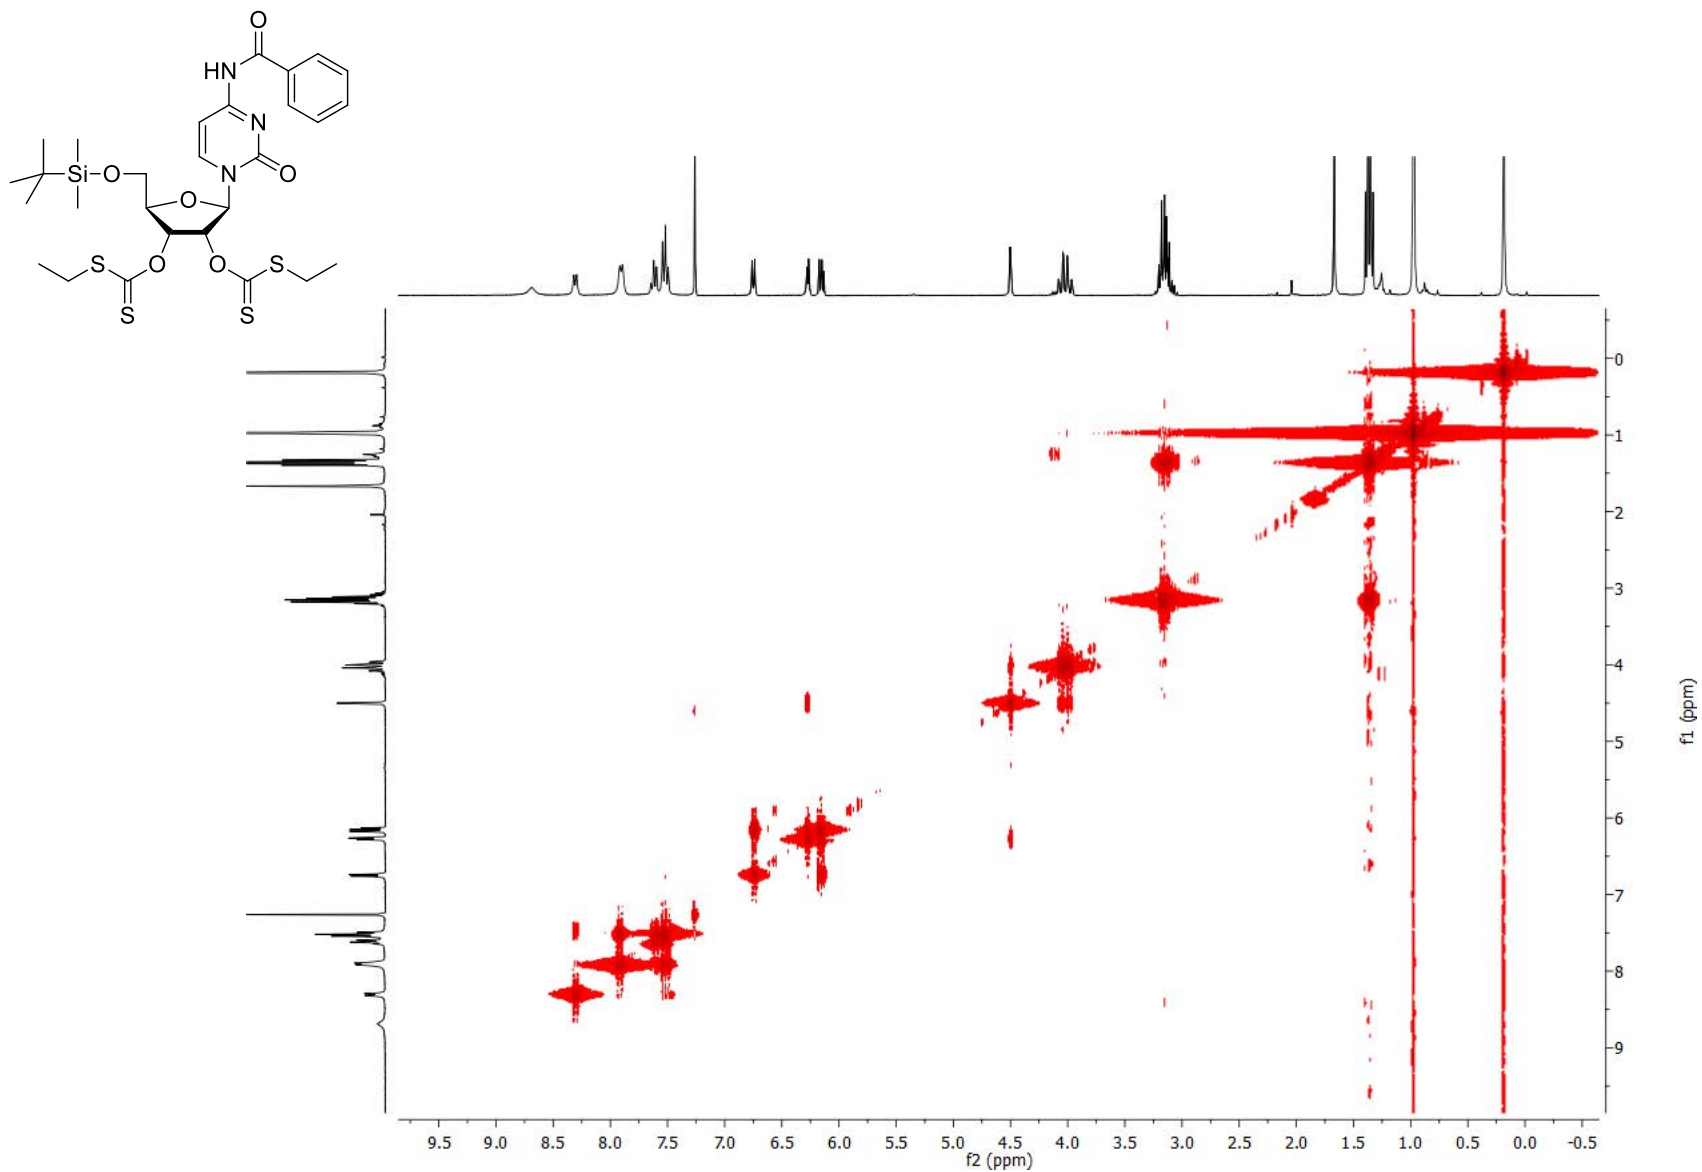

***N*<sup>4</sup>-Benzoyl-5'-*O*-(*tert*-butyldimethylsilyl)-2',3'-bis-*O*-[(ethylthio)thiocarbonyl]-β-D-cytidine (6d)**

HSQC NMR (75.5 MHz, CDCl<sub>3</sub>)

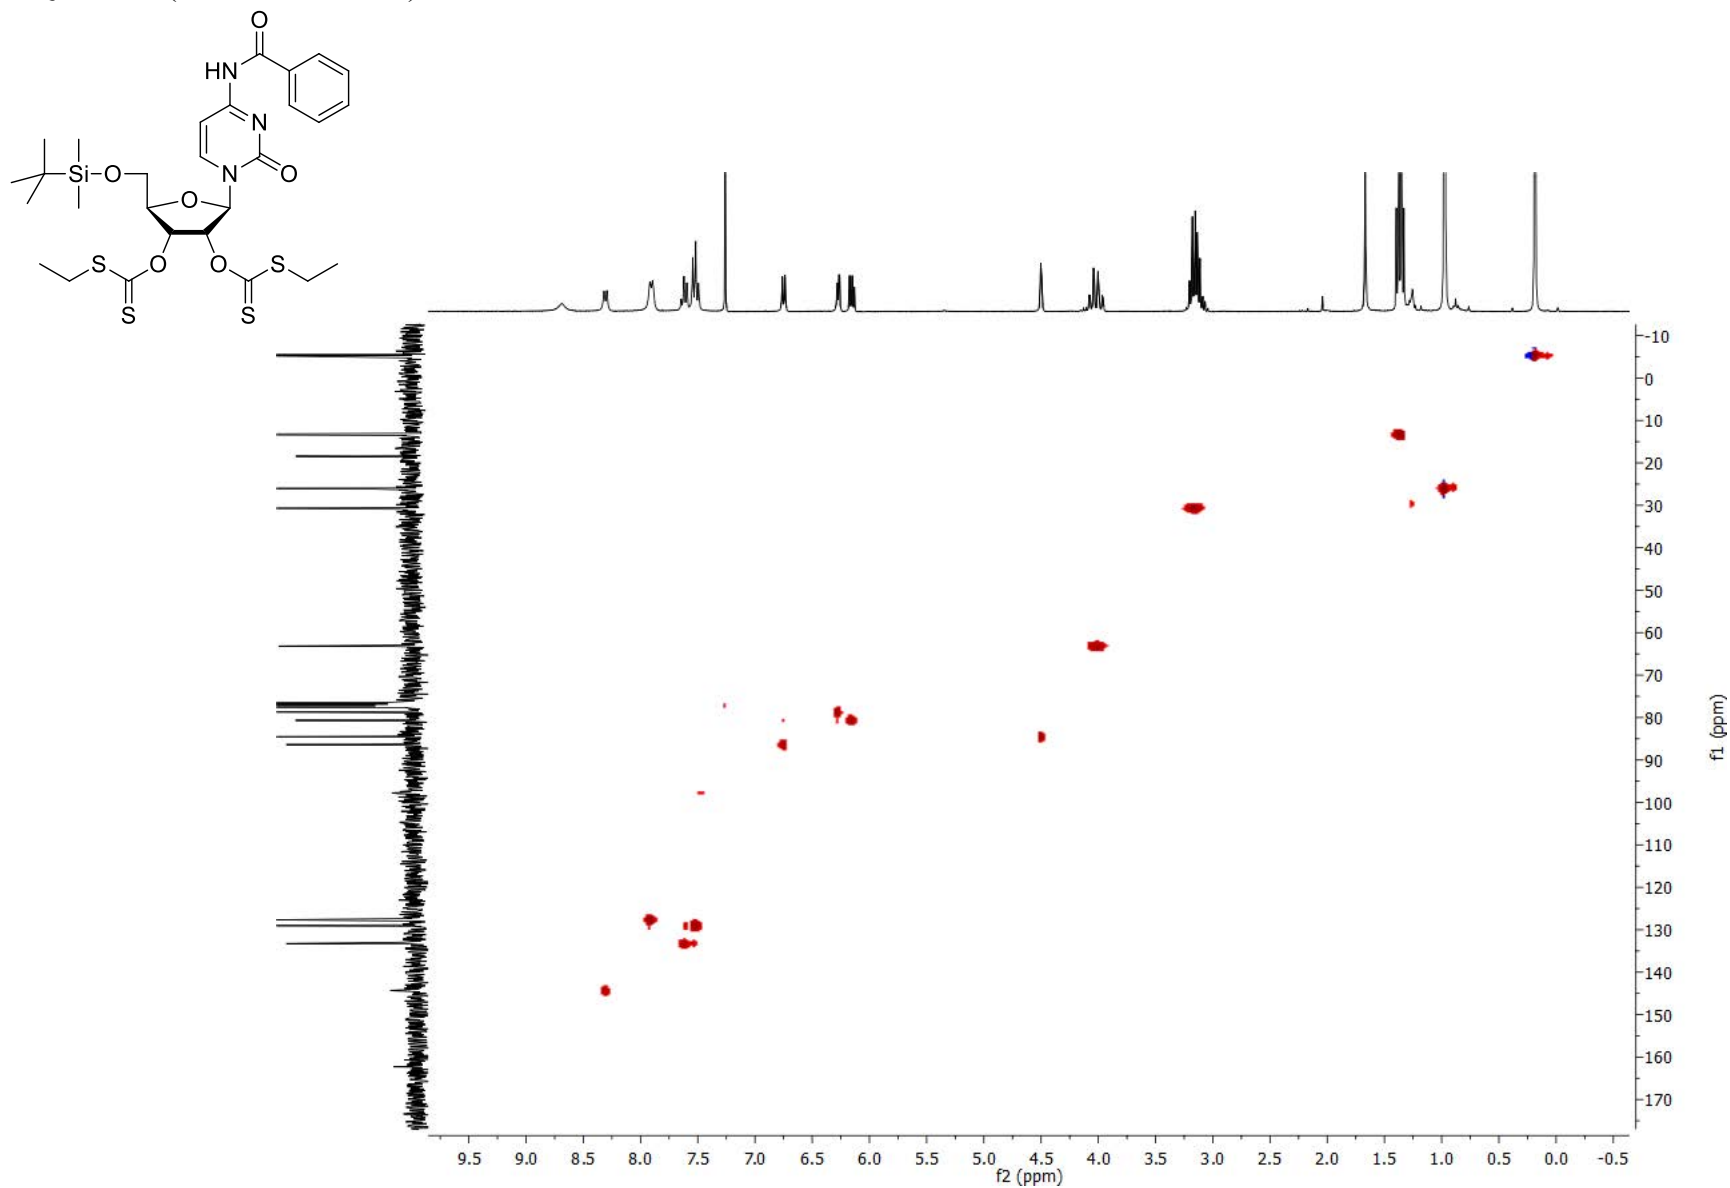

5'-*O*-(*tert*-Butyldimethylsilyl)-2',3'-bis-*O*-[(ethylthio)thiocarbonyl]- $\beta$ -D-adenosine (6e)

$^1\text{H}$ -NMR (300.13 MHz,  $\text{CDCl}_3$ )

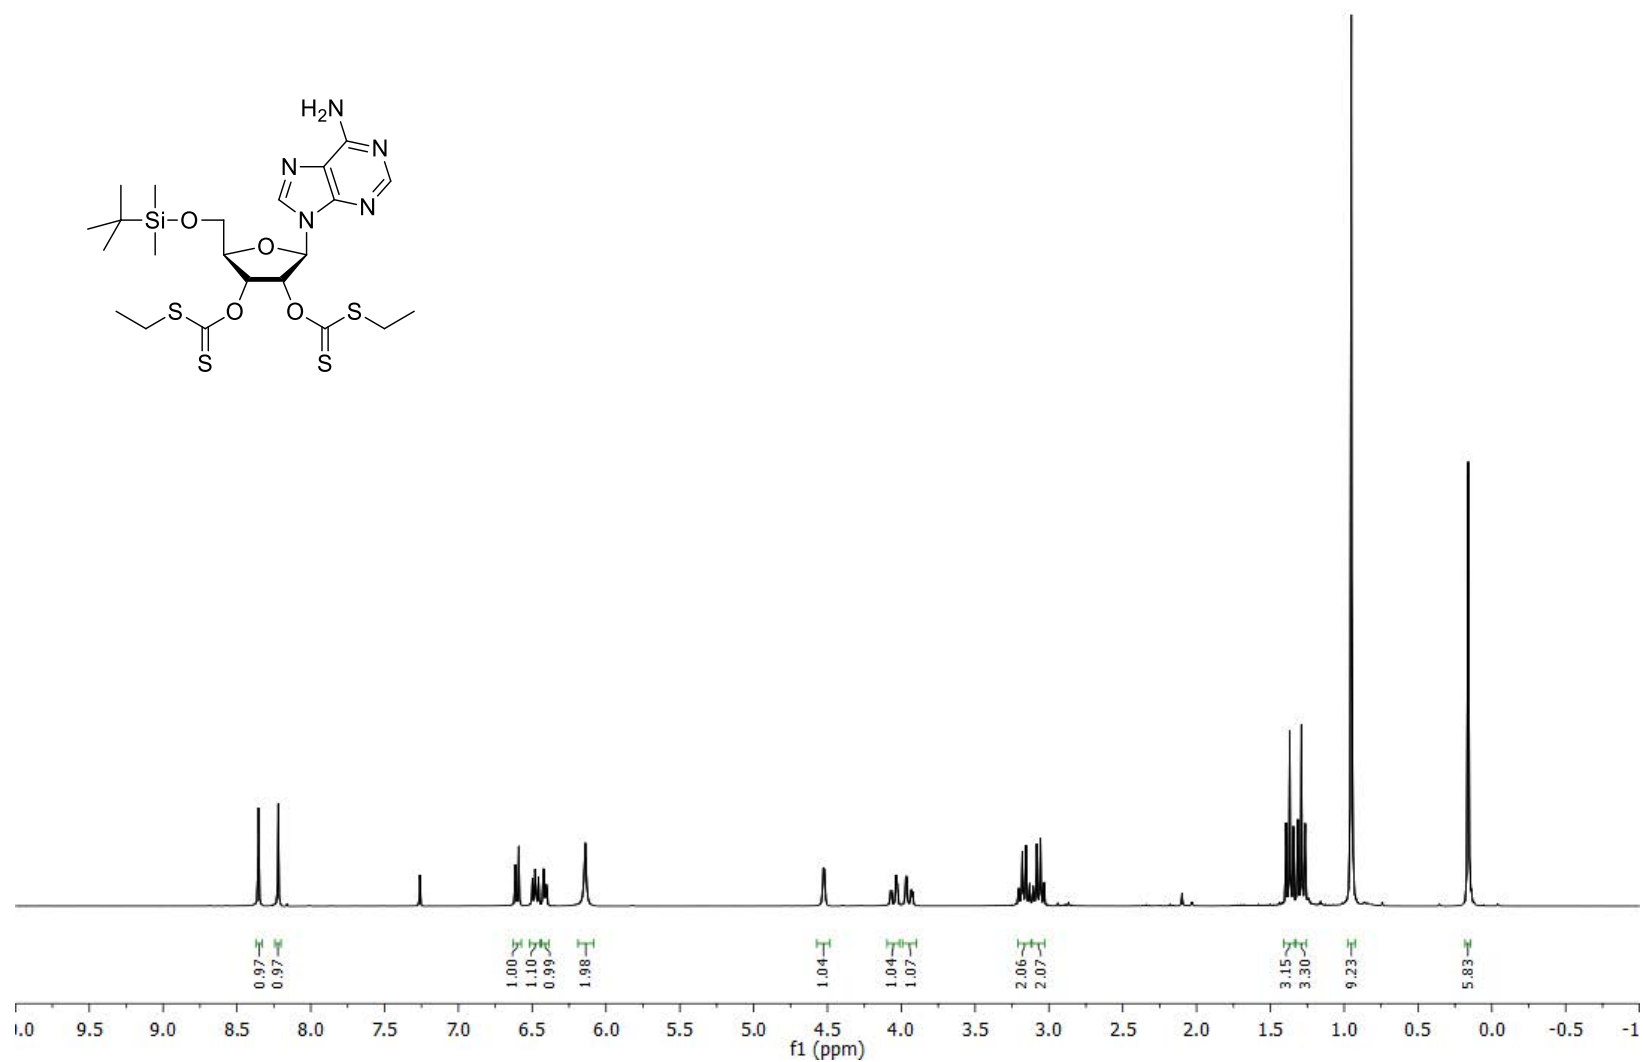

5'-O-(*tert*-Butyldimethylsilyl)-2',3'-bis-O-[(ethylthio)thiocarbonyl]- $\beta$ -D-adenosine (6e)

$^{13}\text{C}$ -NMR (75.5 MHz,  $\text{CDCl}_3$ )

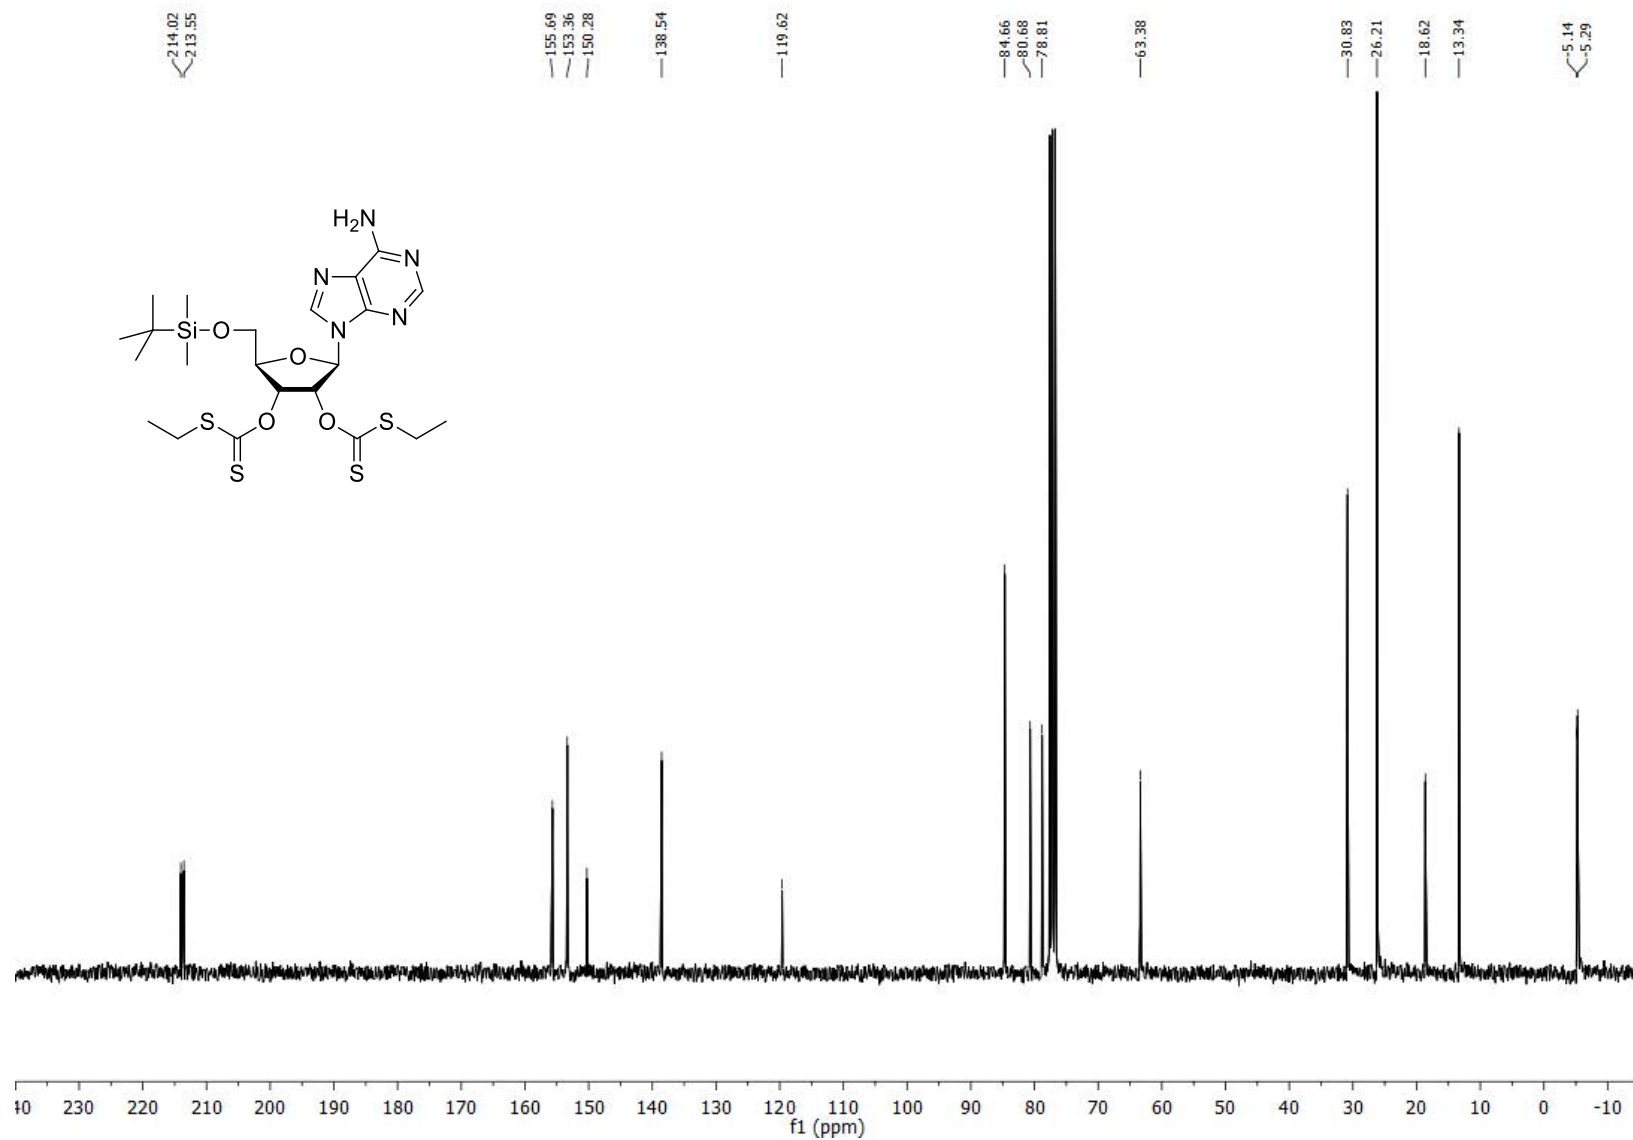



5'-*O*-(*tert*-Butyldimethylsilyl)-2',3'-bis-*O*-[(ethylthio)thiocarbonyl]- $\beta$ -D-adenosine (6e)

DEPT NMR (75.5 MHz, CDCl<sub>3</sub>)

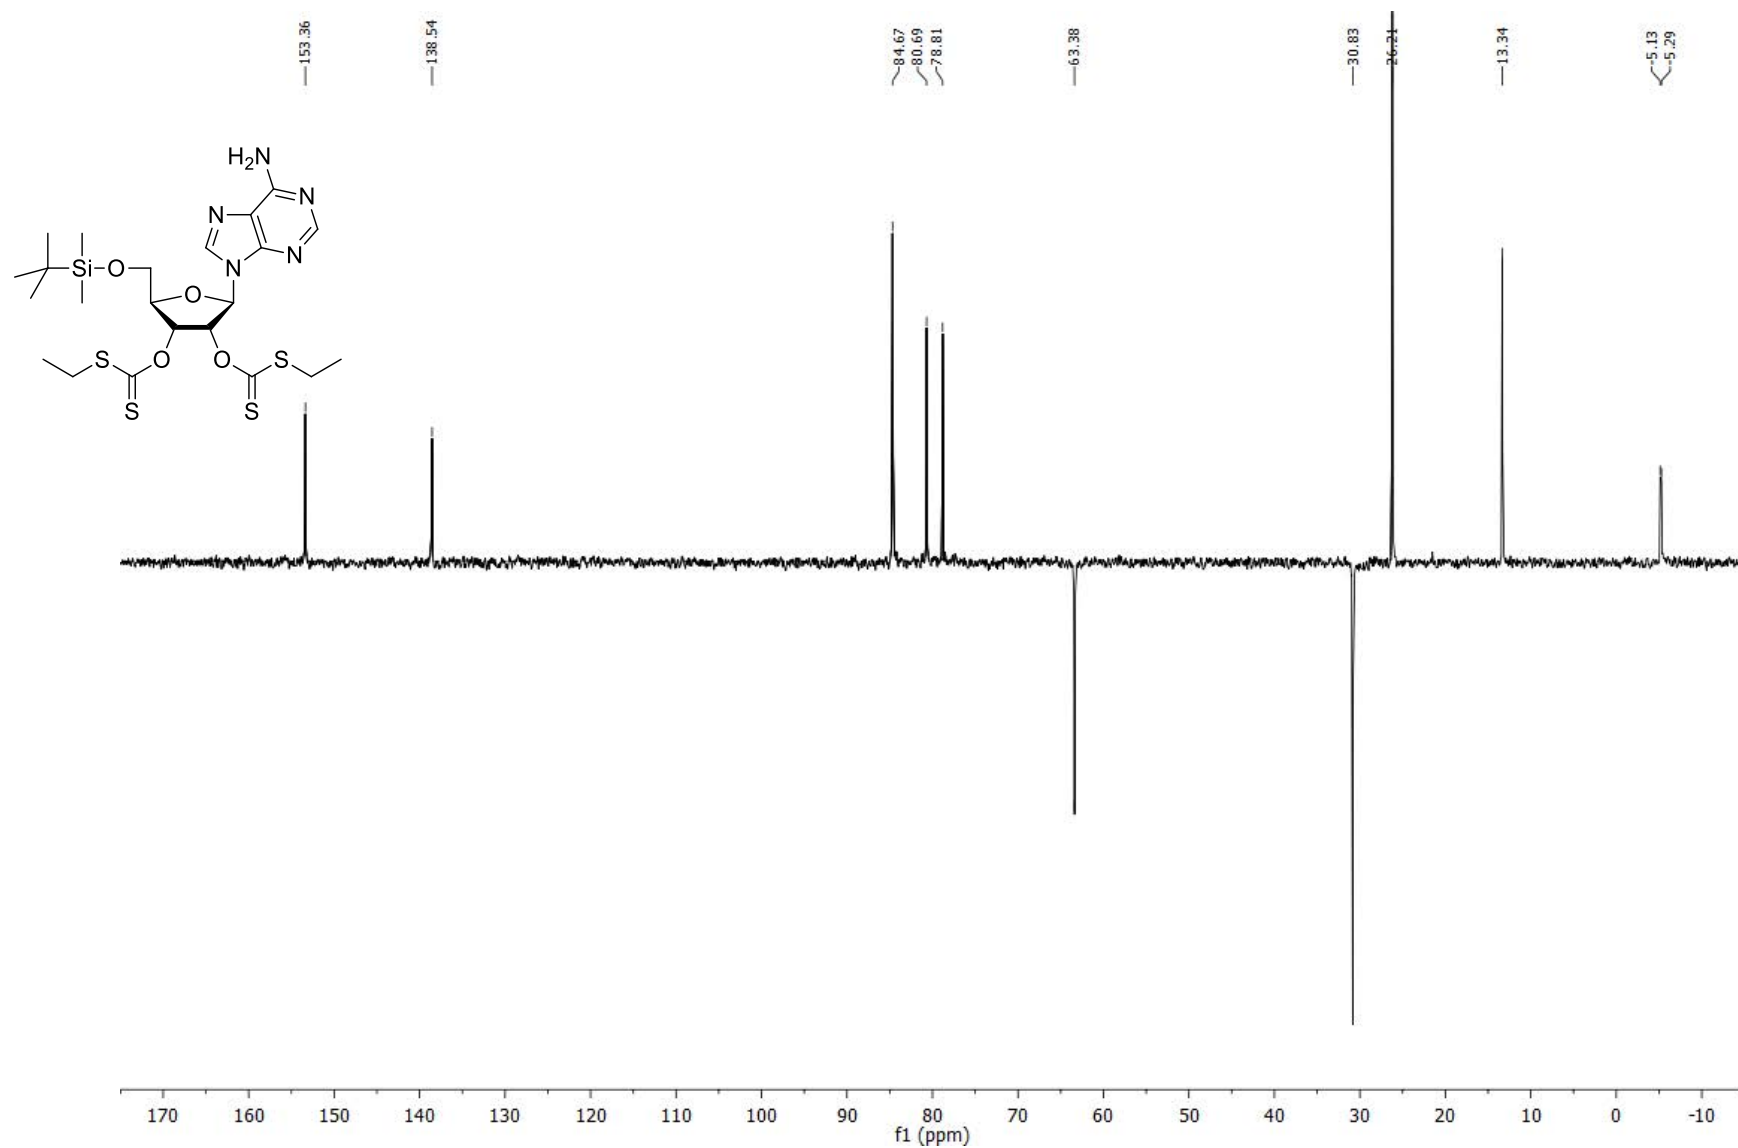

5'-*O*-(*tert*-Butyldimethylsilyl)-2',3'-bis-*O*-[(ethylthio)thiocarbonyl]- $\beta$ -D-adenosine (6e)

COSY NMR ( $\text{CDCl}_3$ )

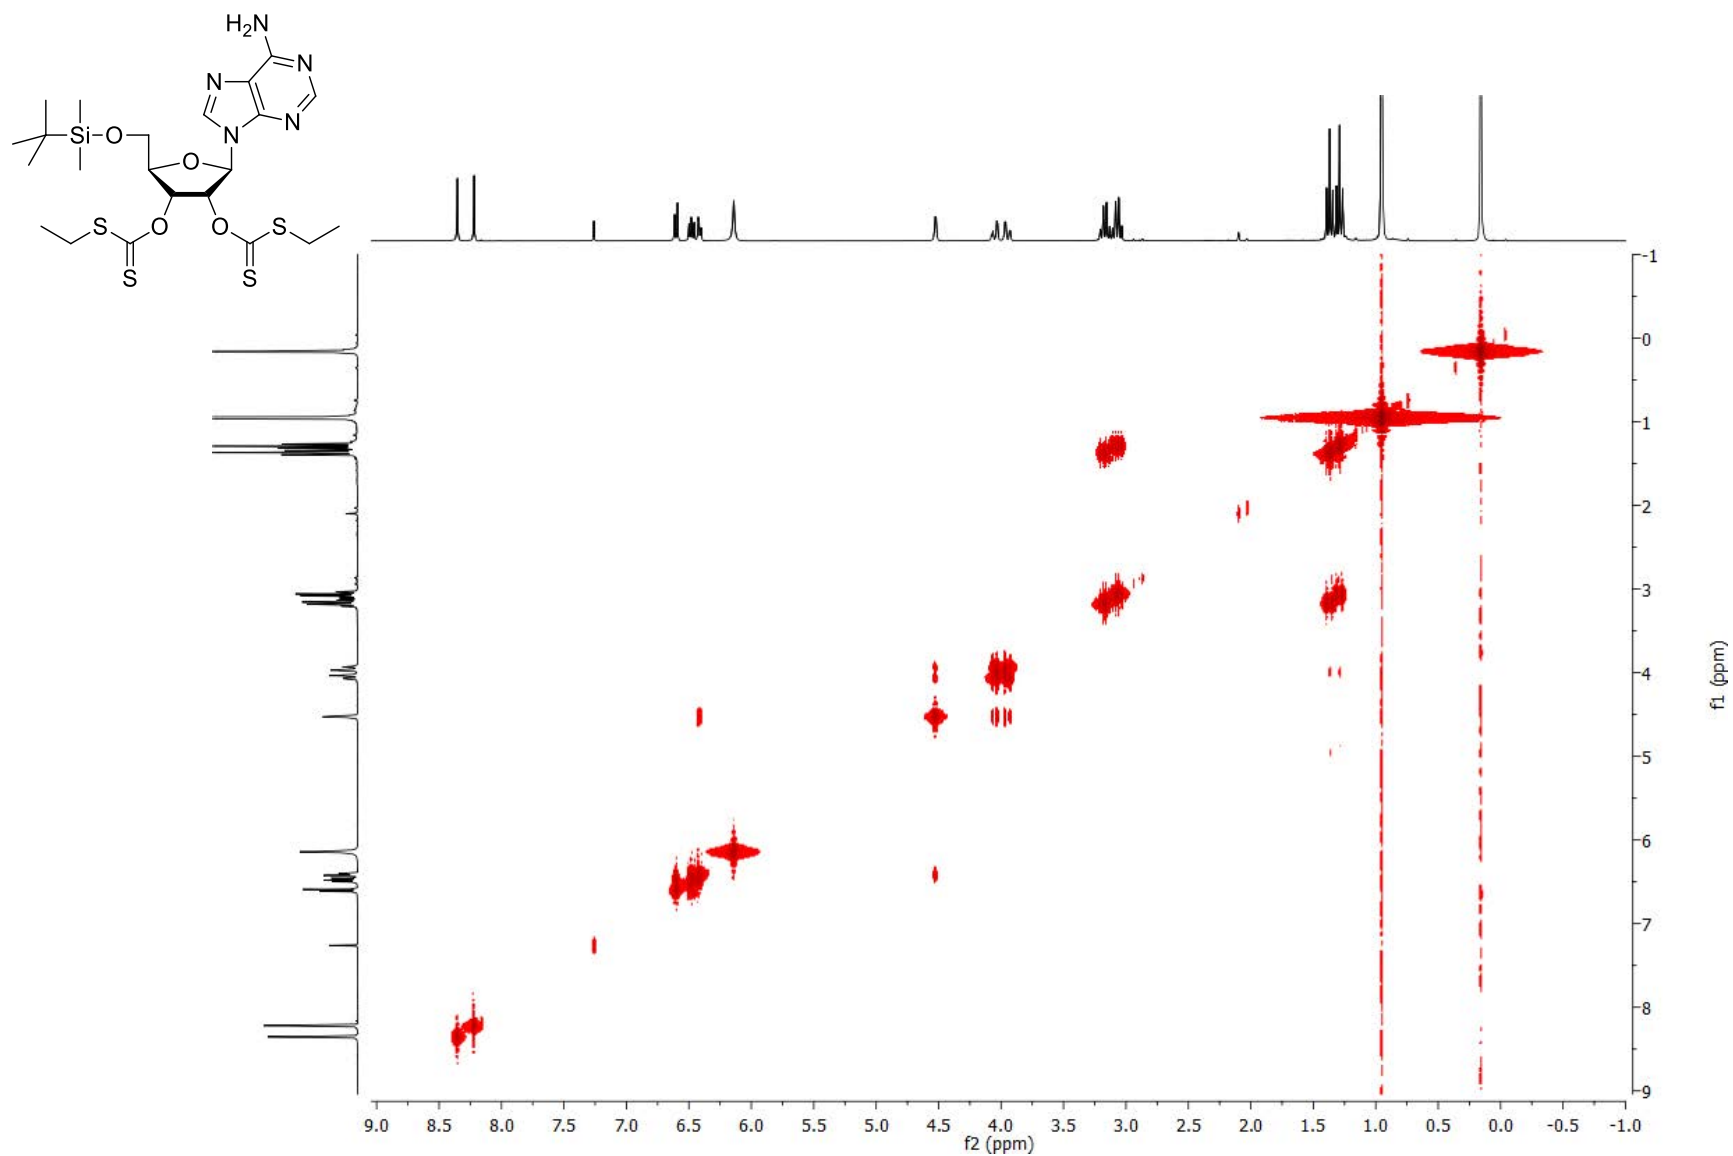

5'-*O*-(*tert*-Butyldimethylsilyl)-2',3'-bis-*O*-[(ethylthio)thiocarbonyl]- $\beta$ -D-adenosine (6e)

HSQC NMR (CDCl<sub>3</sub>)

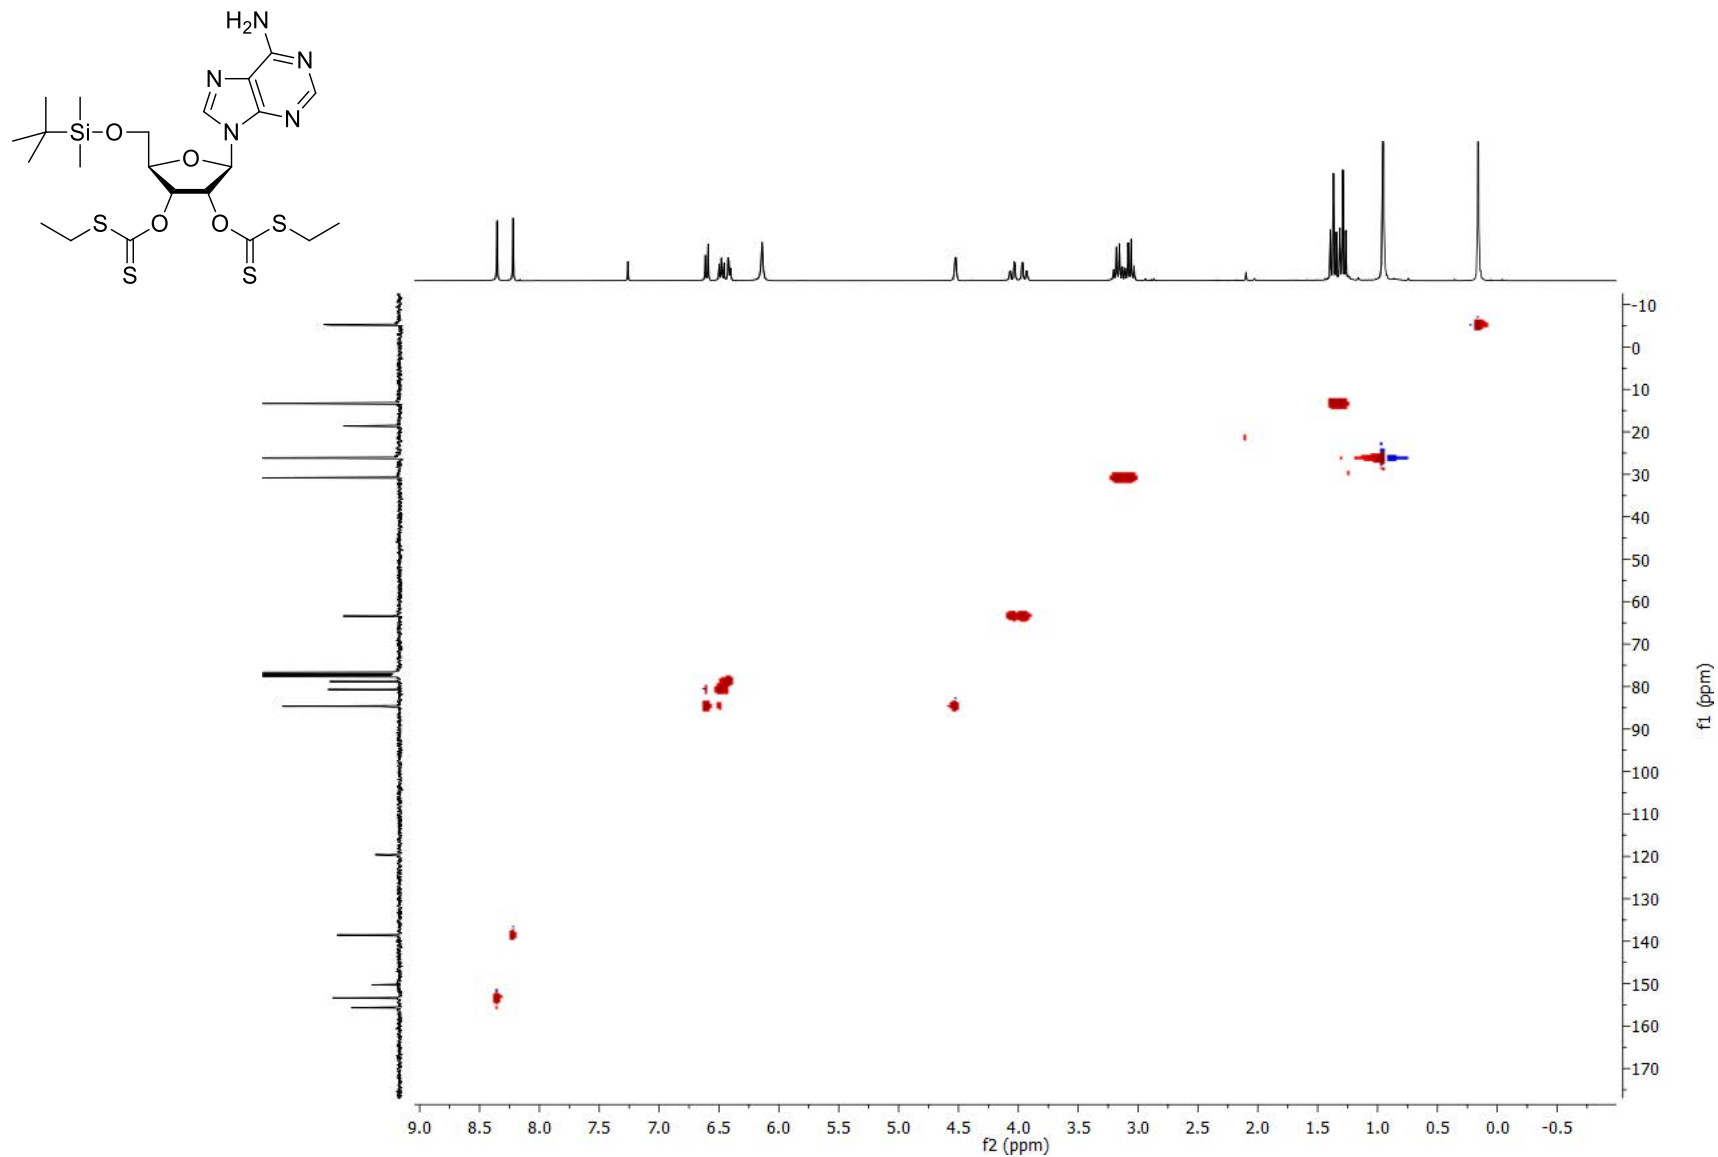

S83

5'-*O*-(*tert*-Butyldimethylsilyl)-2',3'-bis-*O*-[(ethylthio)thiocarbonyl]- $\beta$ -D-adenosine (6e)

HMBC NMR (CDCl<sub>3</sub>)

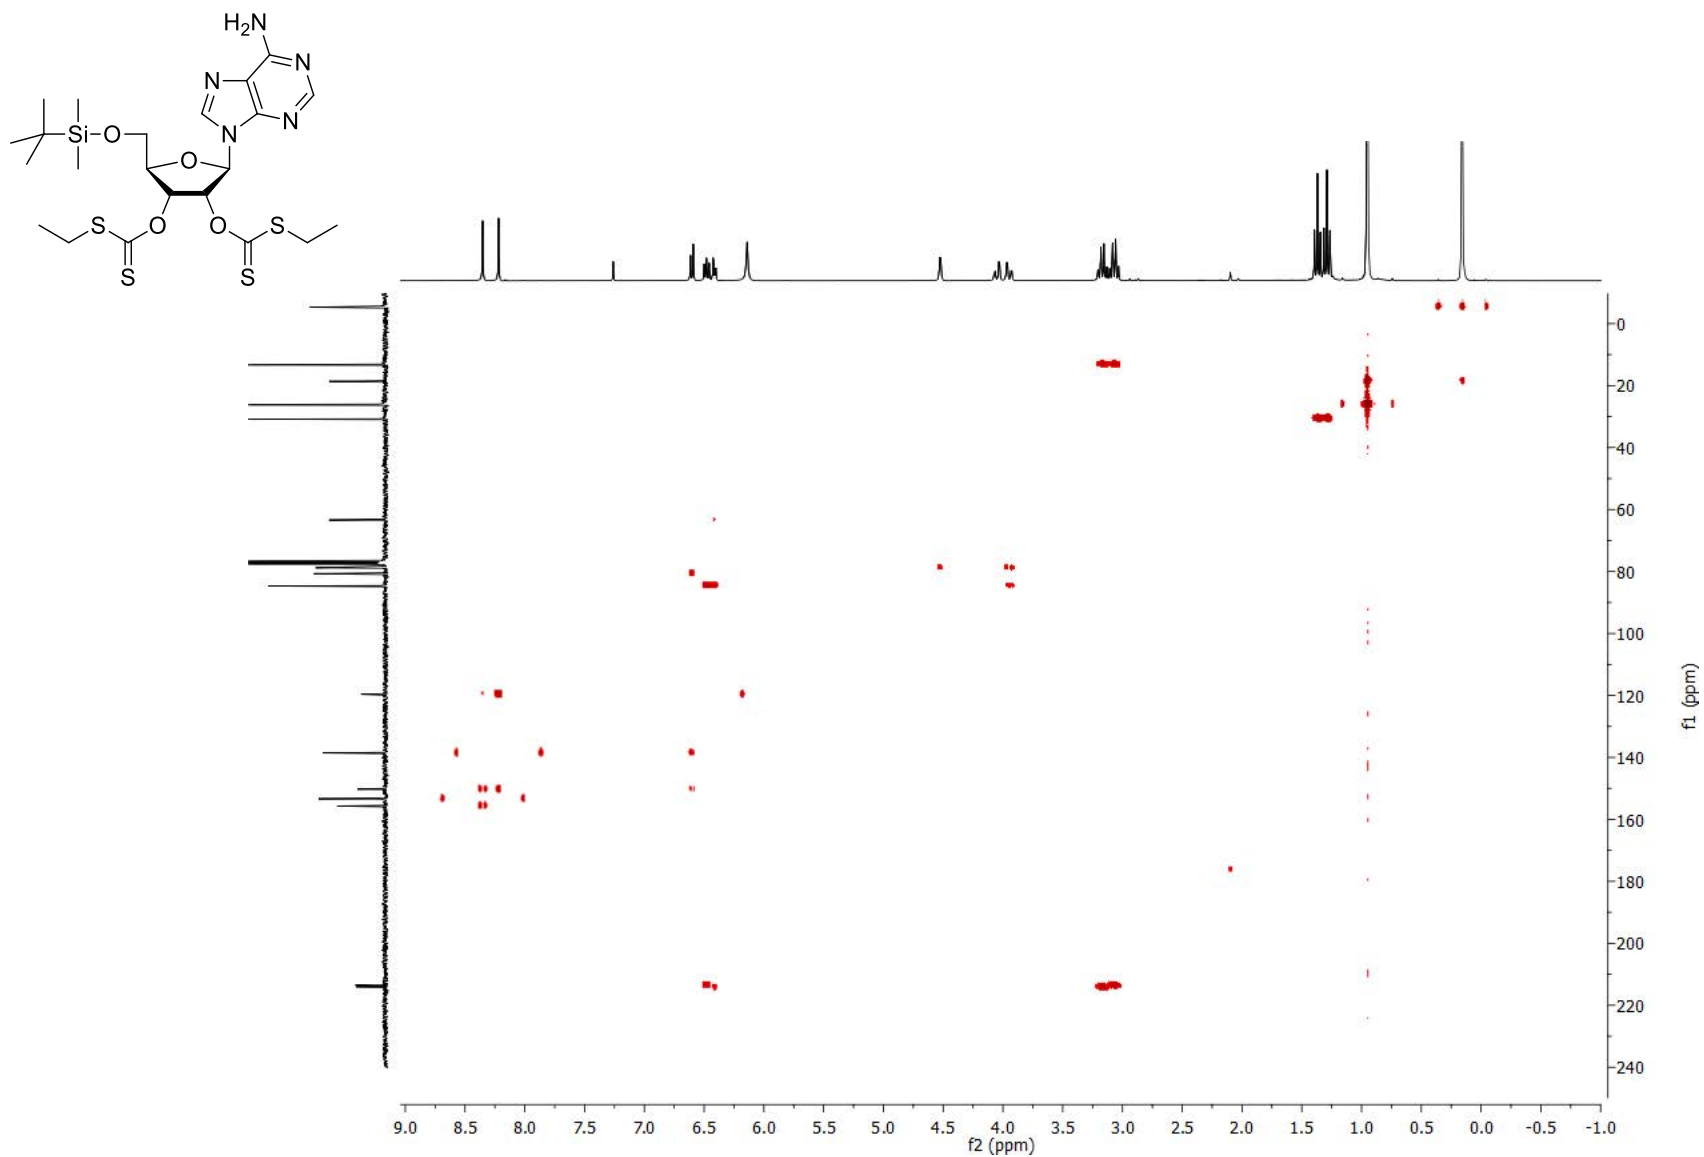

S84

5'-*O*-(*tert*-Butyldimethylsilyl)-2',3'-bis-*O*-[(ethylthio)thiocarbonyl]- $\beta$ -D-inosine (6f)

$^1\text{H}$ -NMR (300.13 MHz,  $\text{CDCl}_3$ )

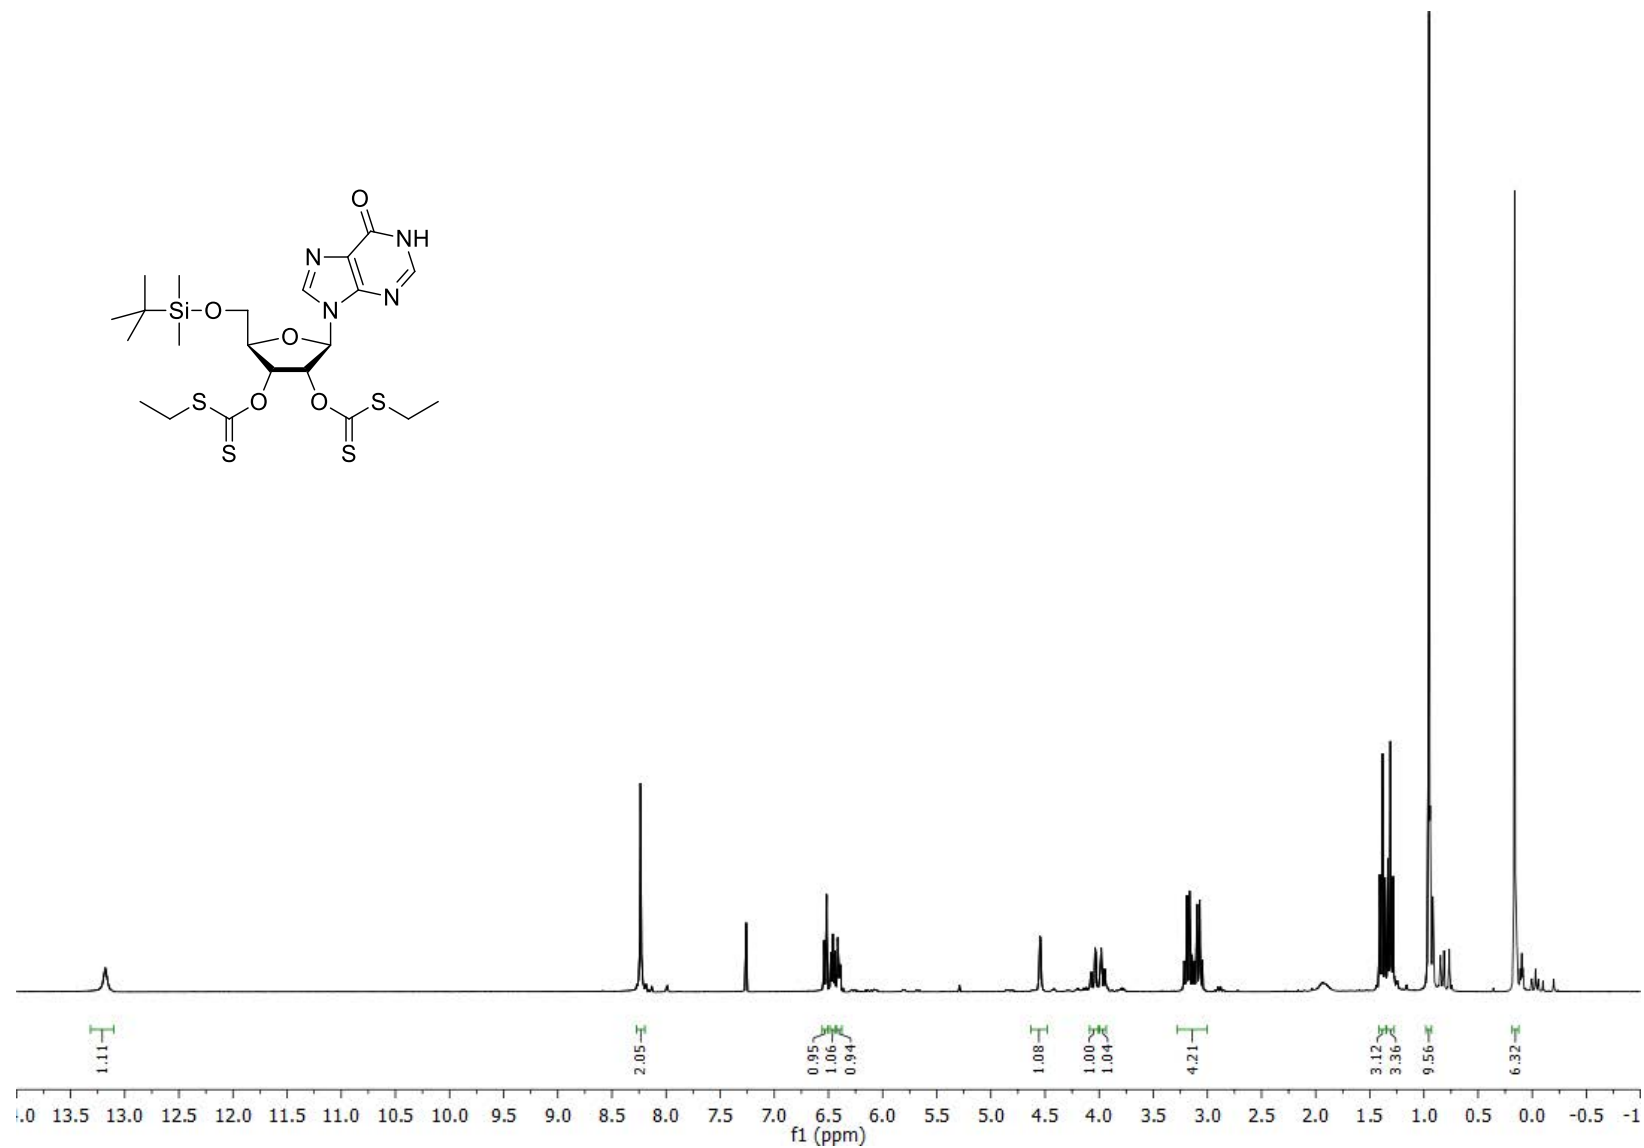

5'-*O*-(*tert*-Butyldimethylsilyl)-2',3'-bis-*O*-[(ethylthio)thiocarbonyl]- $\beta$ -D-inosine (6f)

$^{13}\text{C}$ -NMR (75.5 MHz,  $\text{CDCl}_3$ )

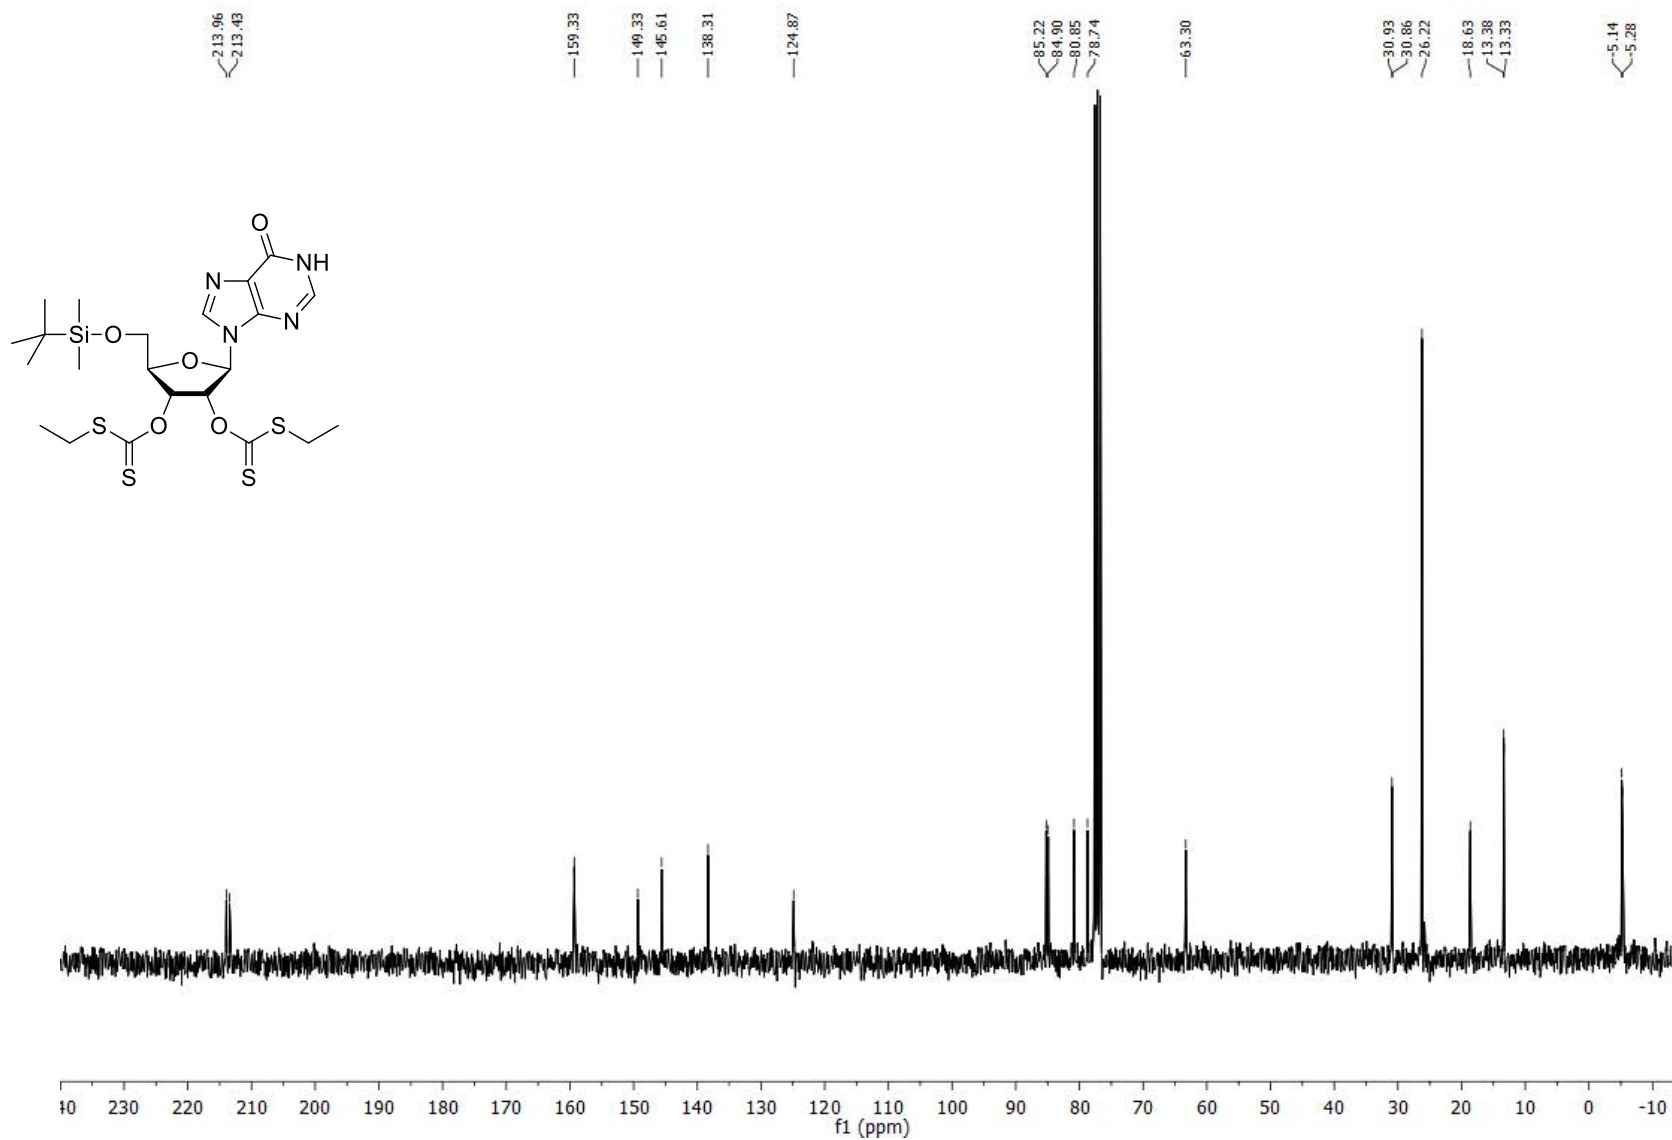

5'-*O*-(*tert*-Butyldimethylsilyl)-2',3'-bis-*O*-[(ethylthio)thiocarbonyl]- $\beta$ -D-inosine (6f)

DEPT NMR (75.5 MHz, CDCl<sub>3</sub>)

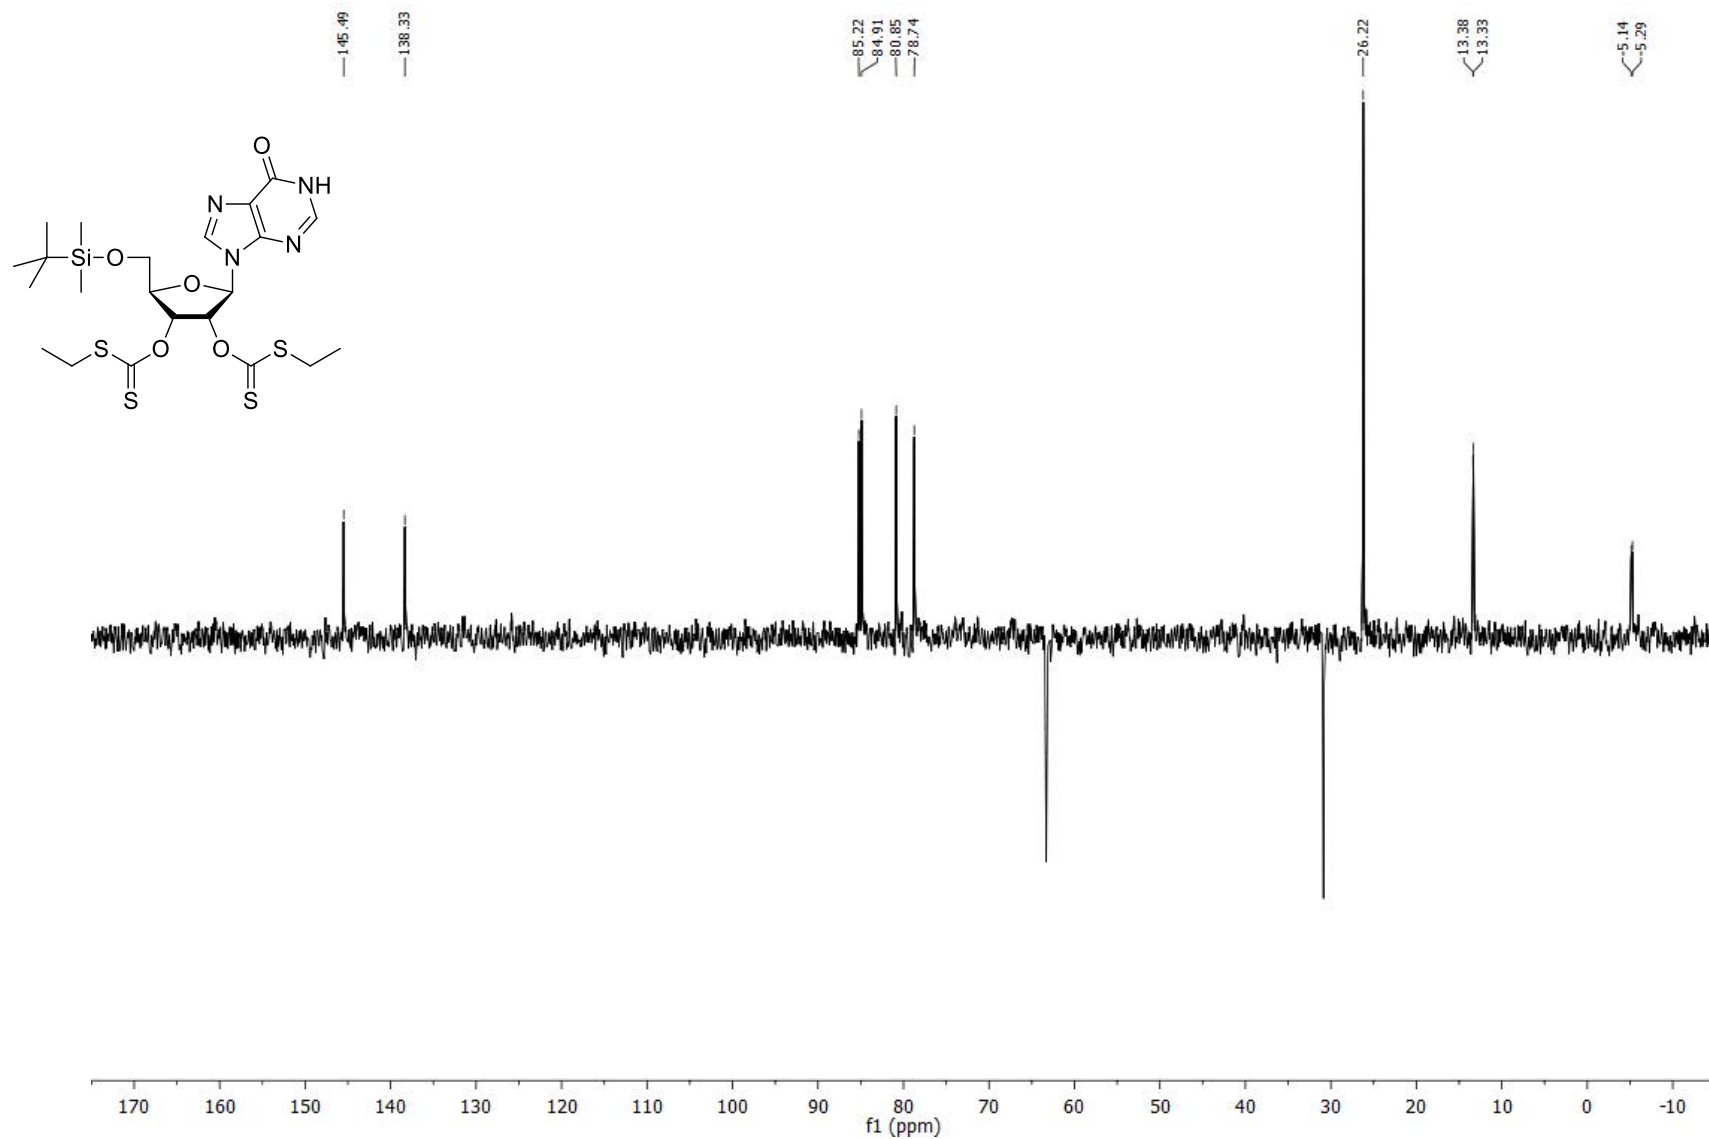

5'-*O*-(*tert*-Butyldimethylsilyl)-2',3'-bis-*O*-[(ethylthio)thiocarbonyl]- $\beta$ -D-inosine (6f)

COSY NMR (CDCl<sub>3</sub>)

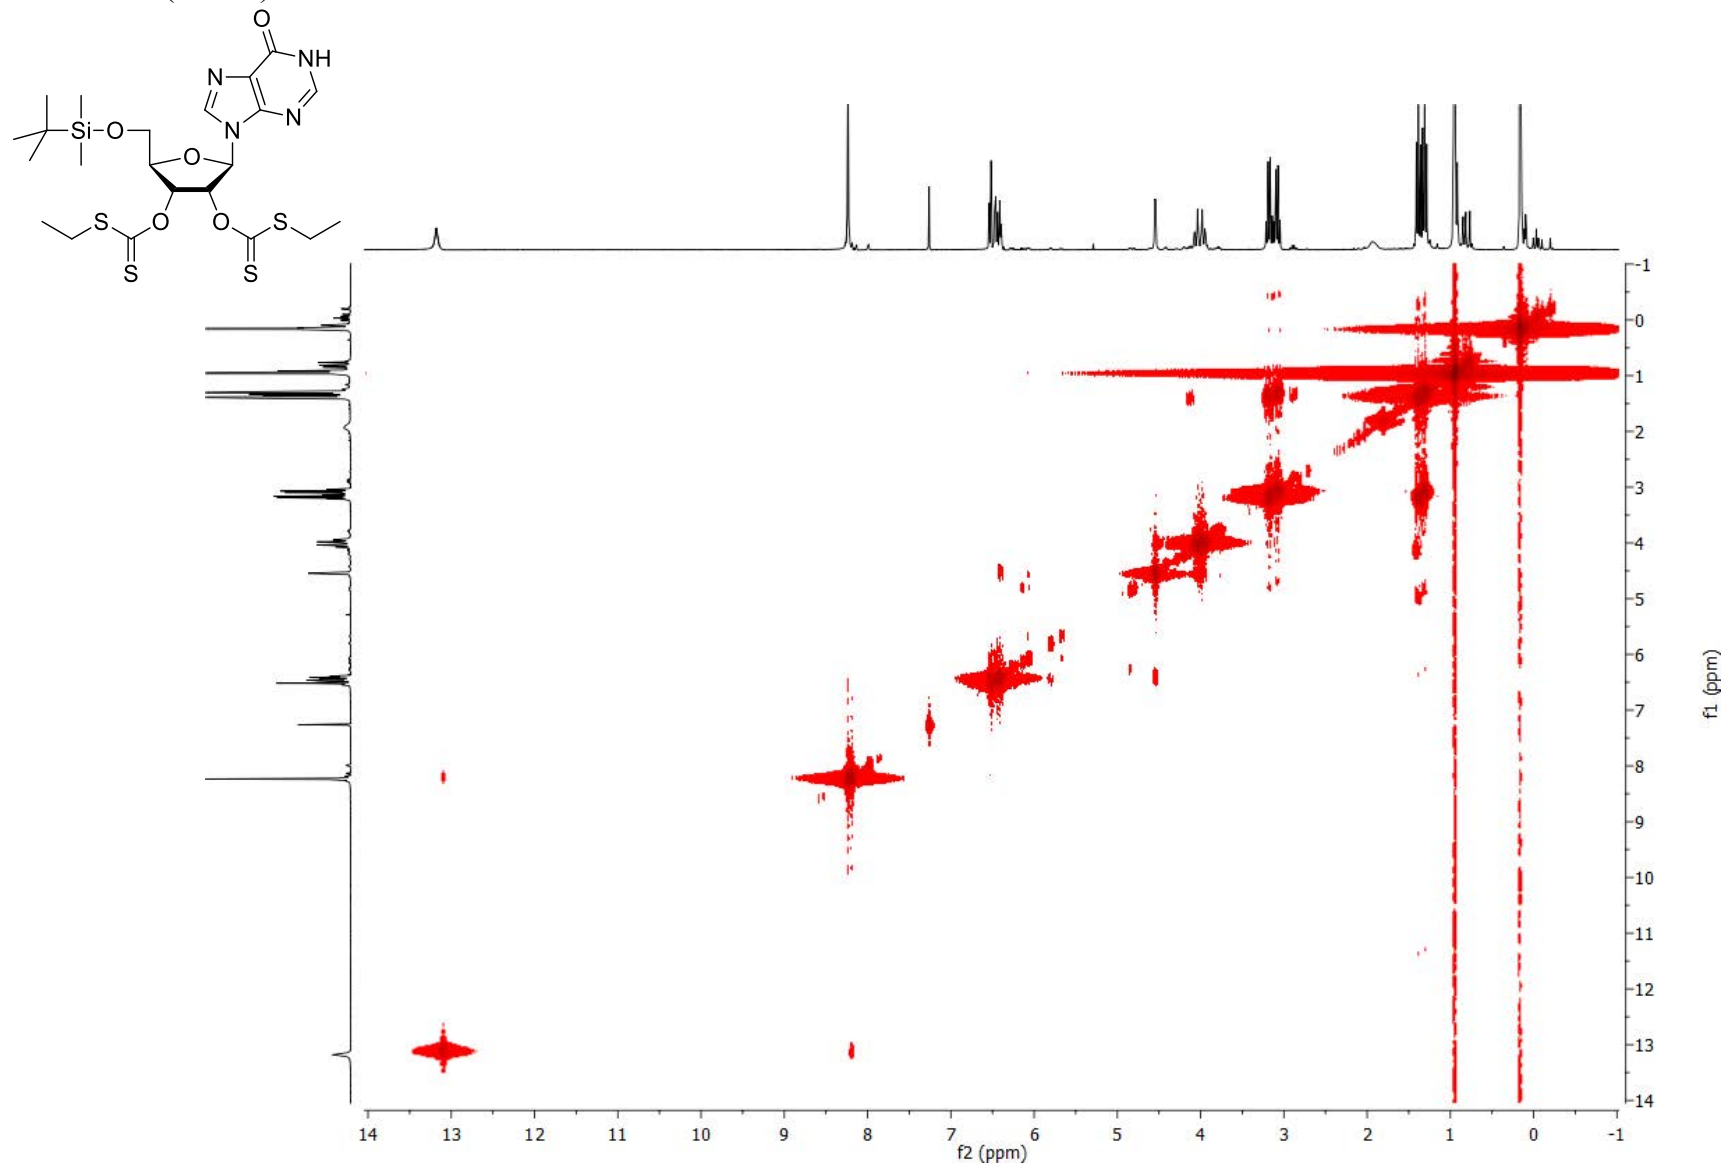



5'-*O*-(*tert*-Butyldimethylsilyl)-2',3'-bis-*O*-[(ethylthio)thiocarbonyl]- $\beta$ -D-inosine (6f)

HSQC NMR (CDCl<sub>3</sub>)

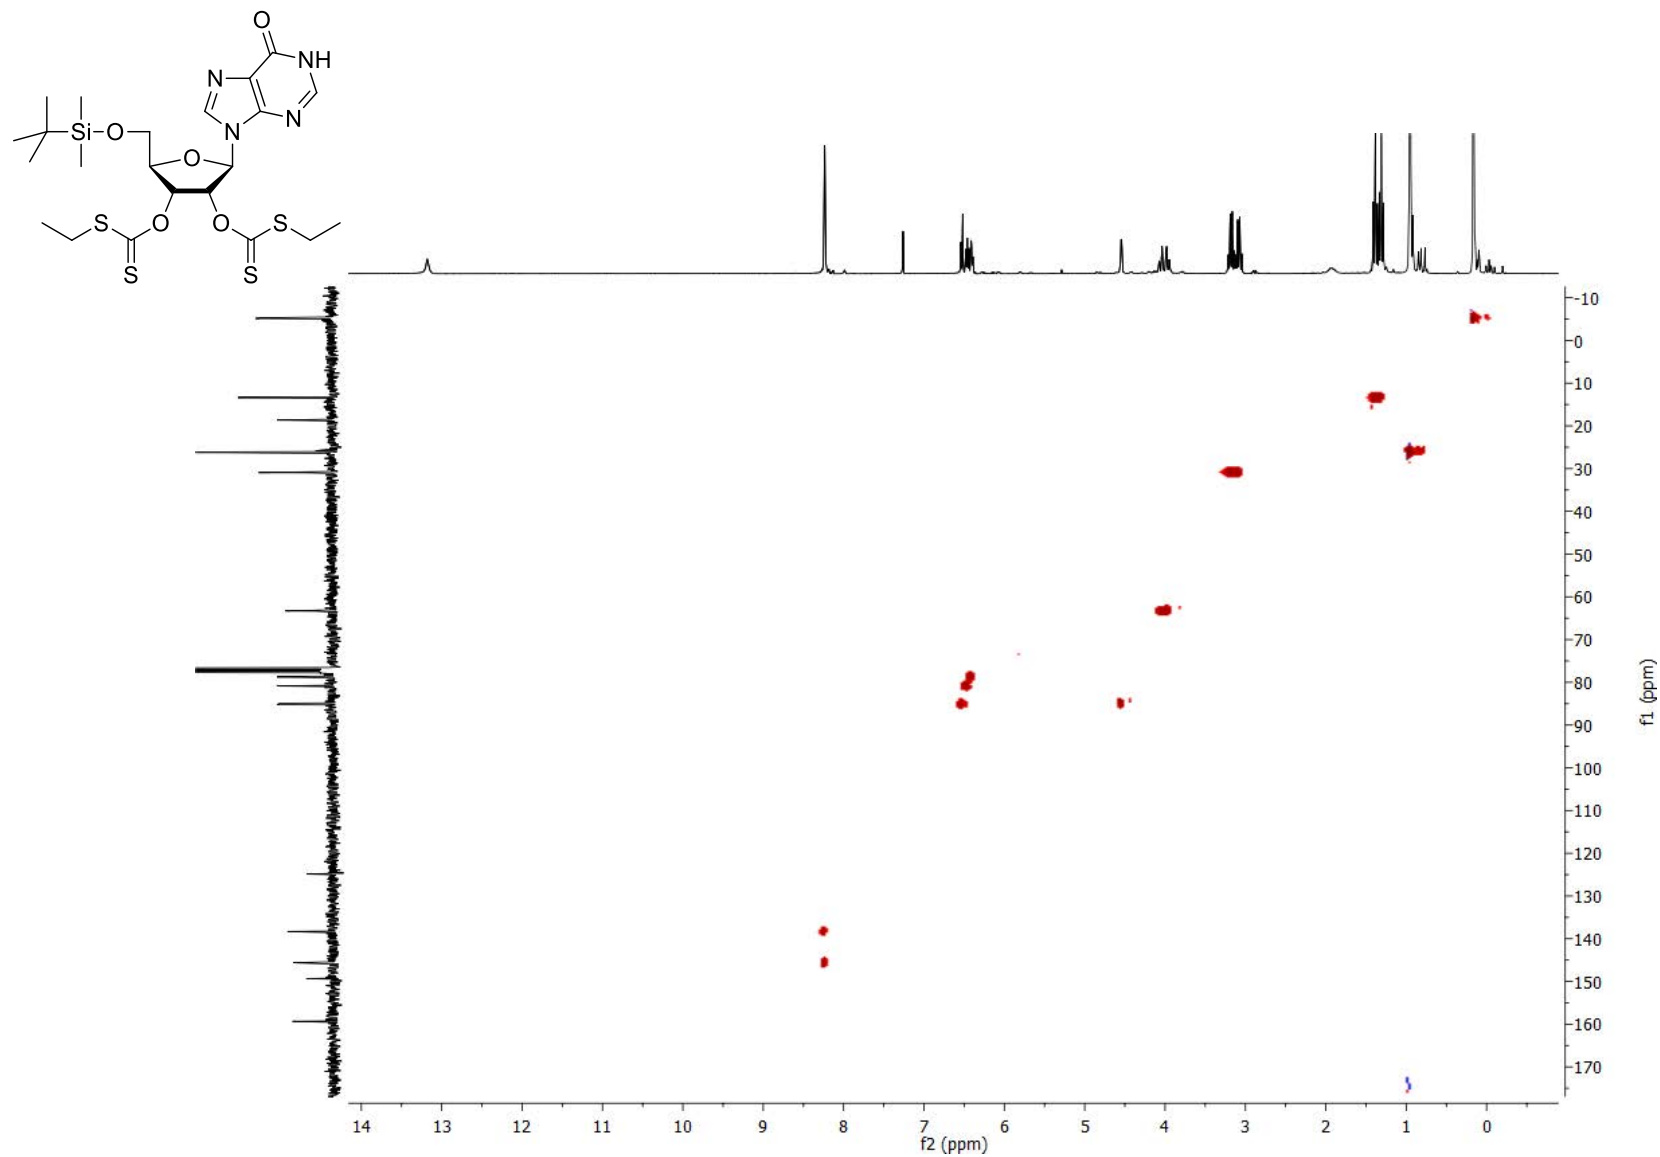

**5'-O-(*tert*-Butyldimethylsilyl)-2',3'-didehydro-2',3'-dideoxy- $\beta$ -D-uridine (7a)**

$^1\text{H-NMR}$  (300.13 MHz,  $\text{DMSO-}d_6$ )

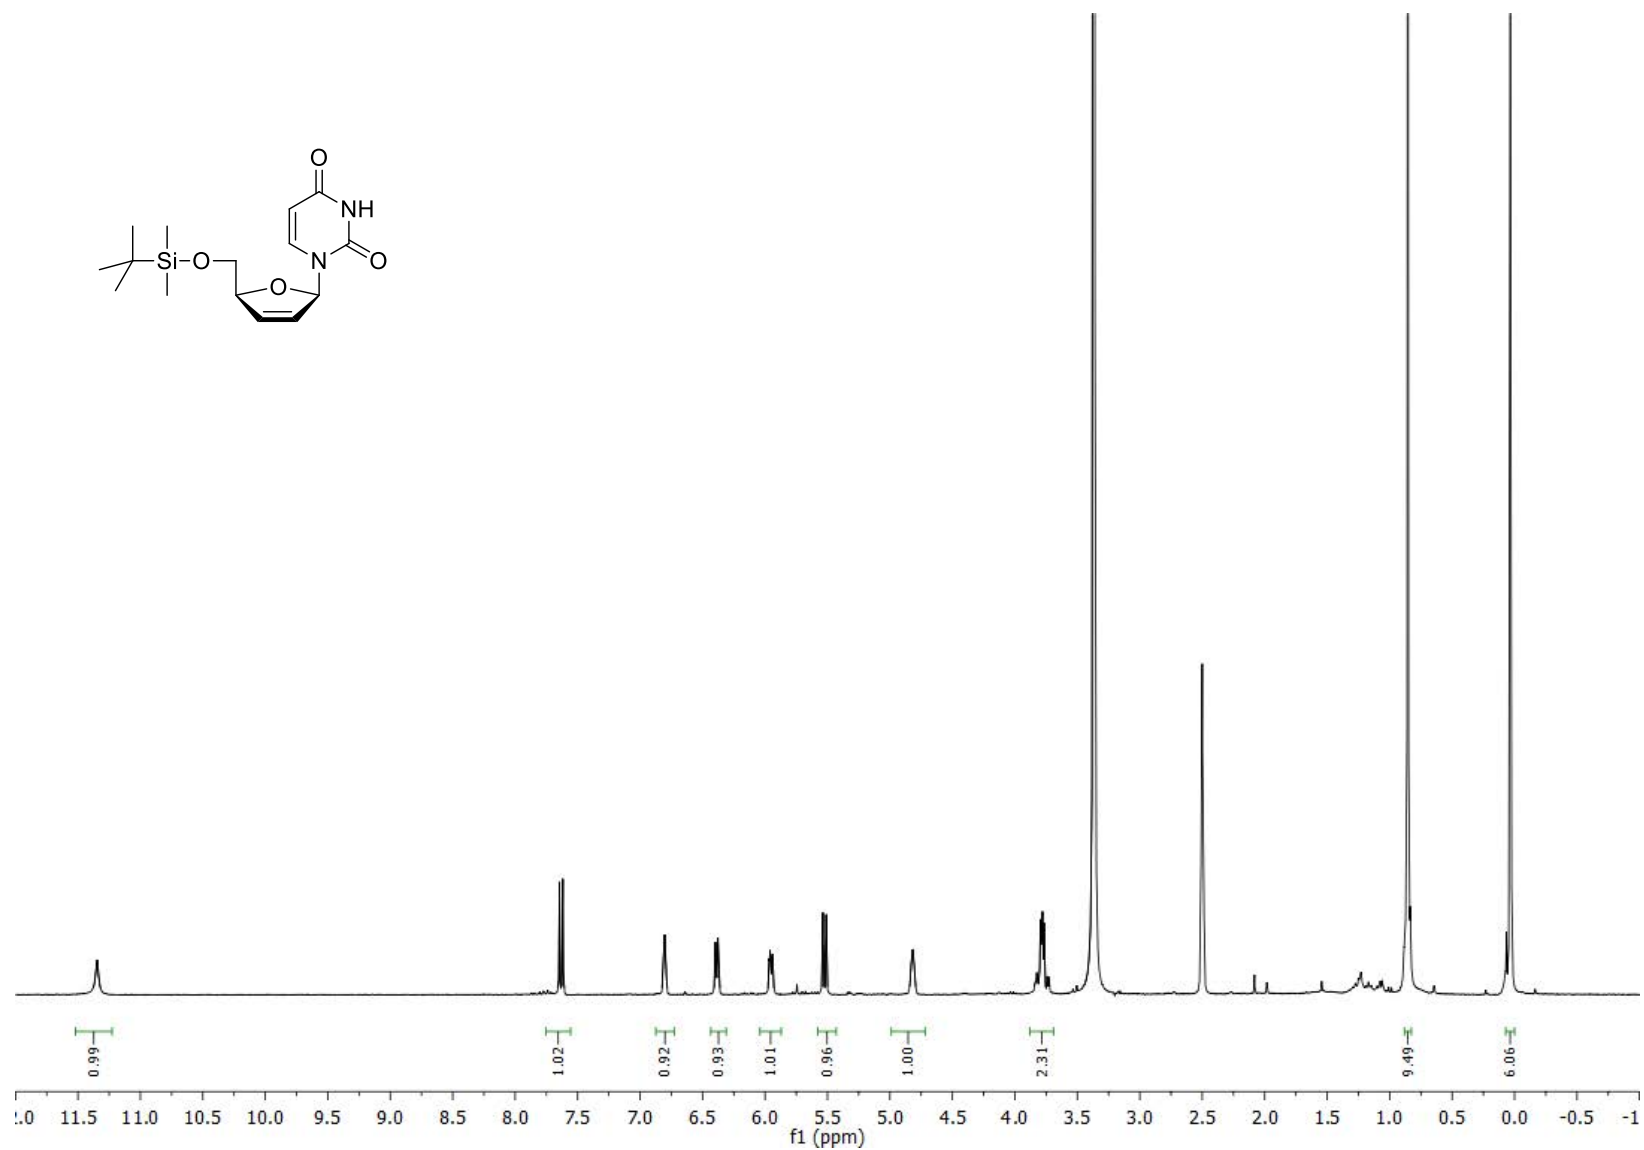

5'-O-(*tert*-Butyldimethylsilyl)-2',3'-didehydro-2',3'-dideoxy- $\beta$ -D-uridine (7a)

$^{13}\text{C}$ -NMR (75.5 MHz,  $\text{DMSO-}d_6$ )

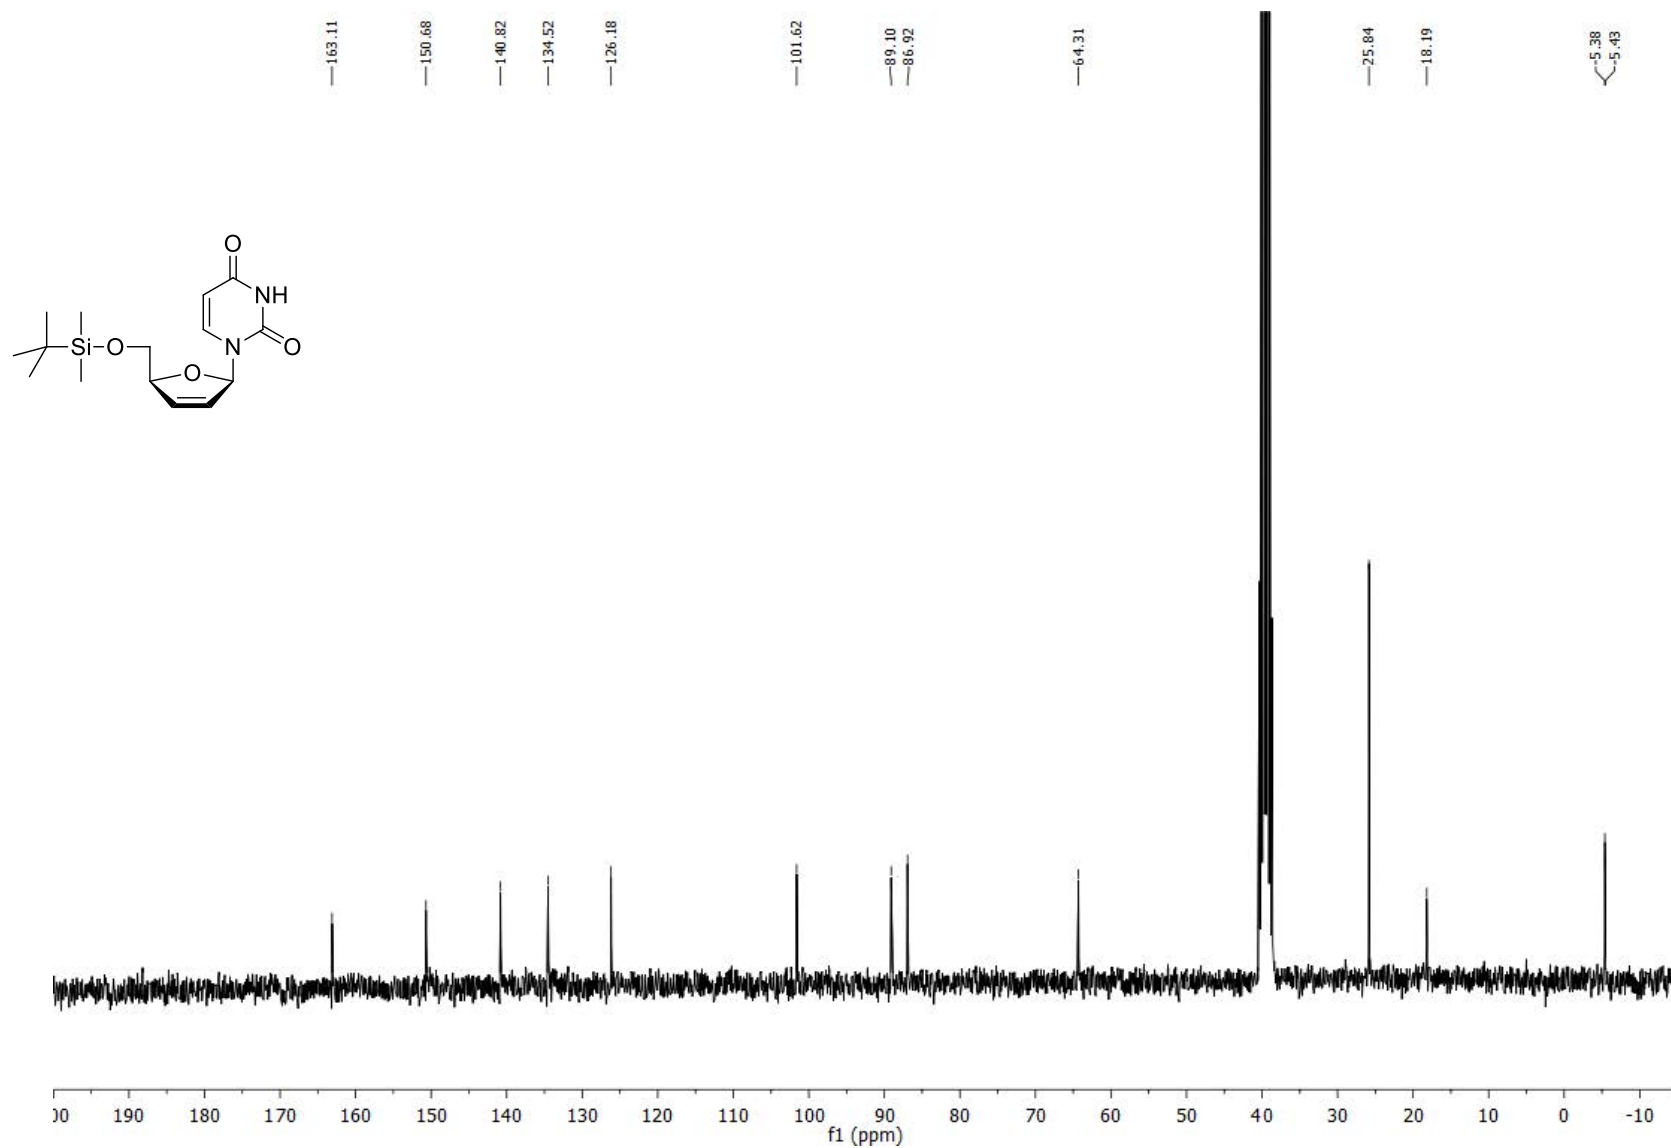

**5'-O-(*tert*-Butyldimethylsilyl)-2',3'-didehydro-3'-deoxy- $\beta$ -D-5-thymidine (7b)**

$^1\text{H-NMR}$  (300.13 MHz,  $\text{DMSO-}d_6$ )

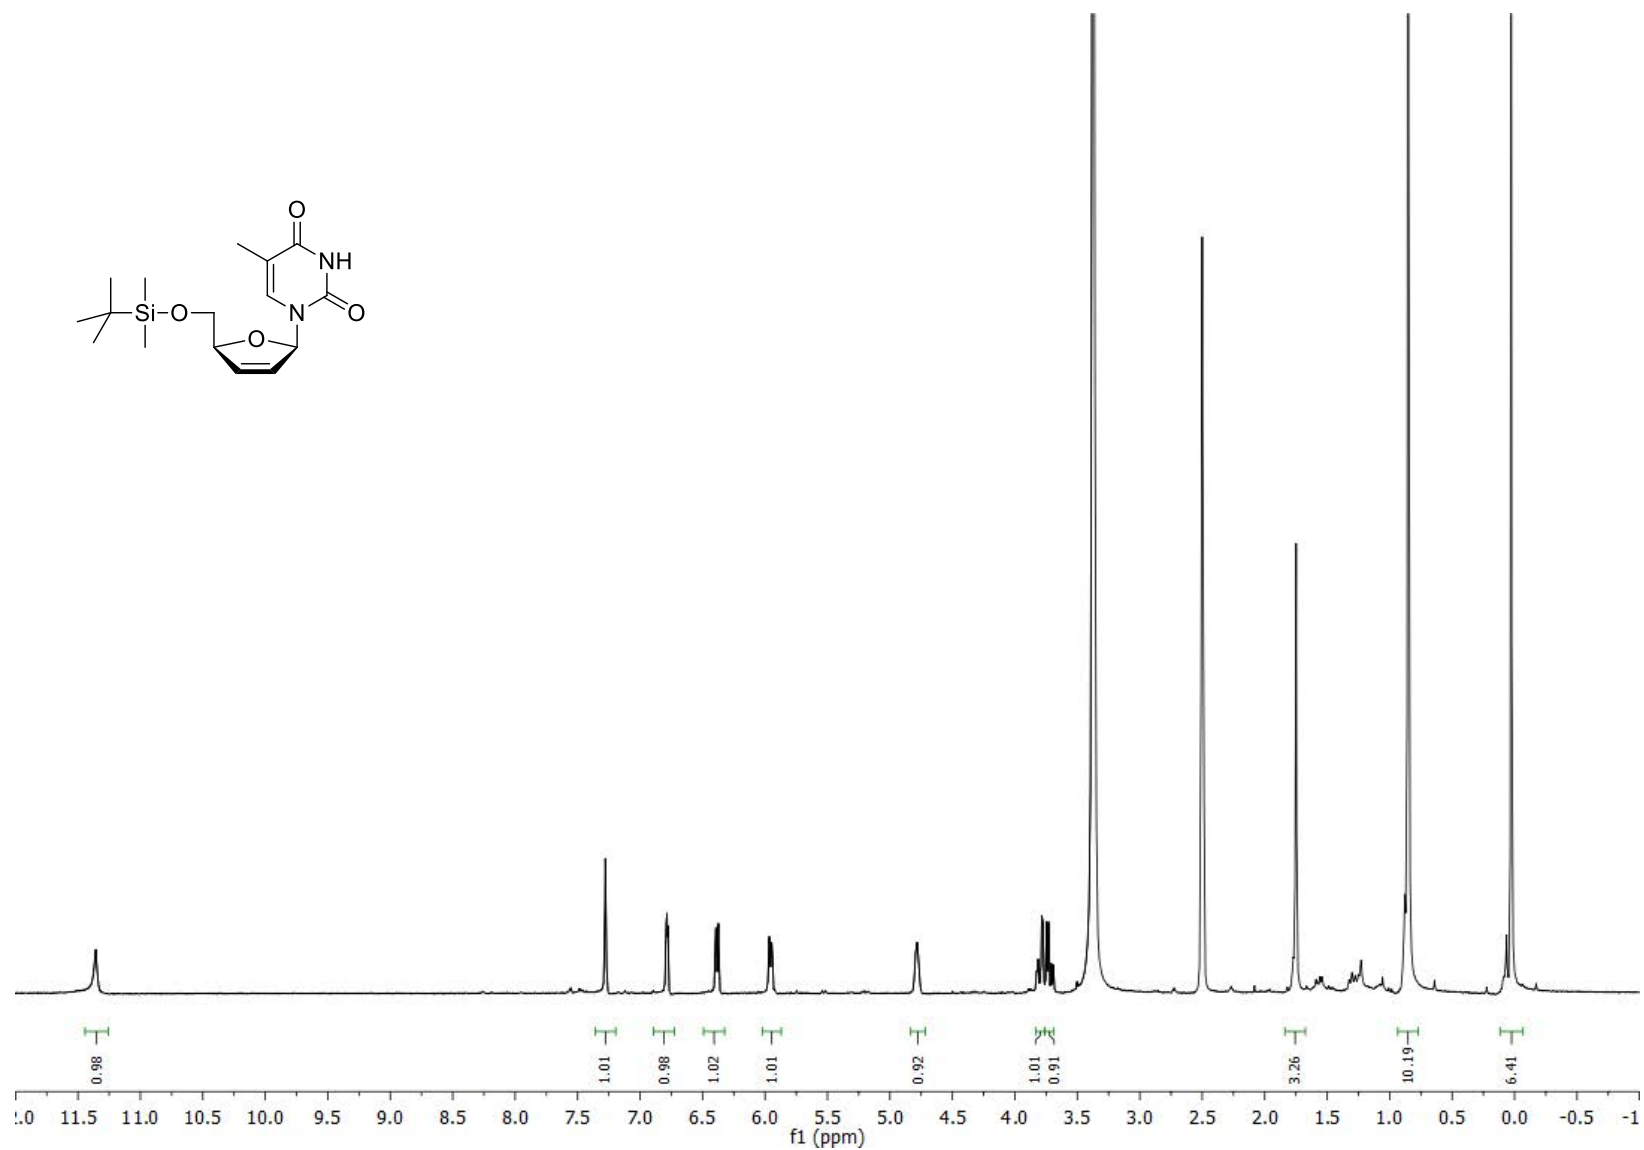

5'-O-(*tert*-Butyldimethylsilyl)-2',3'-didehydro-3'-deoxy- $\beta$ -D-5-thymidine (7b)

$^{13}\text{C}$ -NMR (75.5 MHz,  $\text{DMSO-}d_6$ )

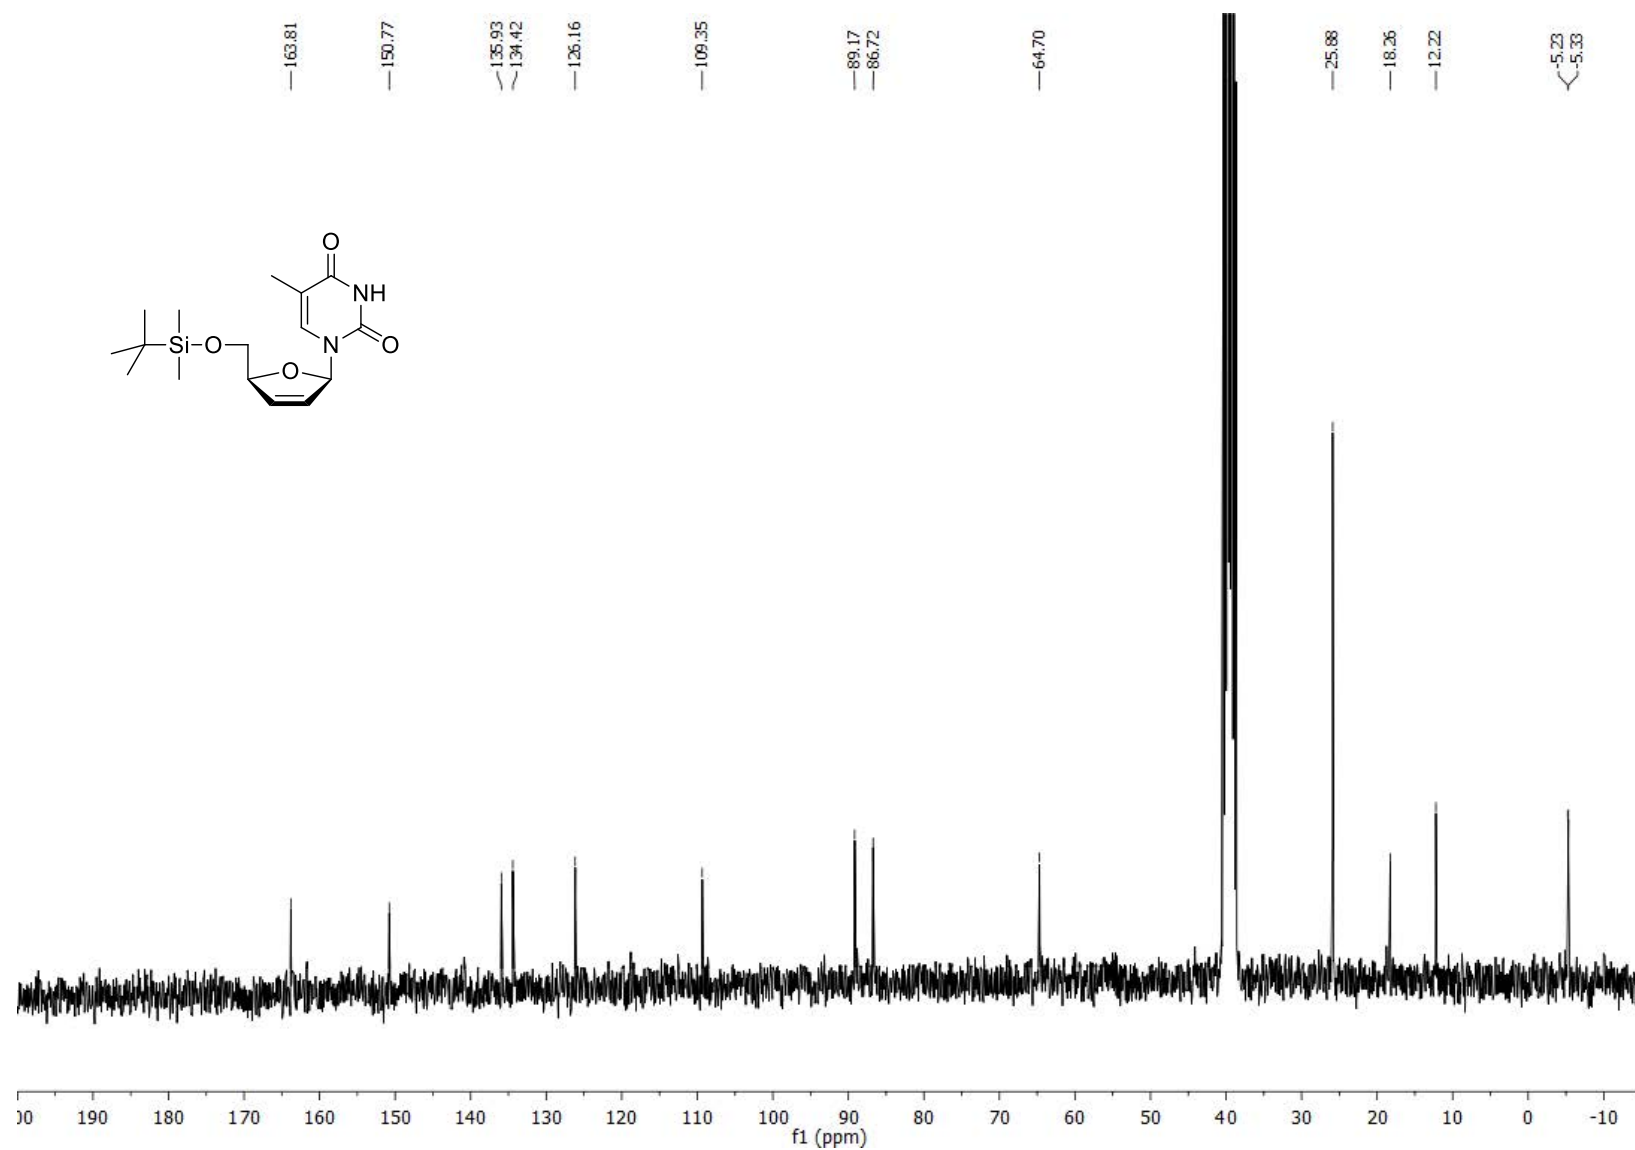

5'-O-(*tert*-Butyldimethylsilyl)-2',3'-didehydro-3'-deoxy- $\beta$ -D-5-thymidine (7b)

HSQC NMR (DMSO- $d_6$ )

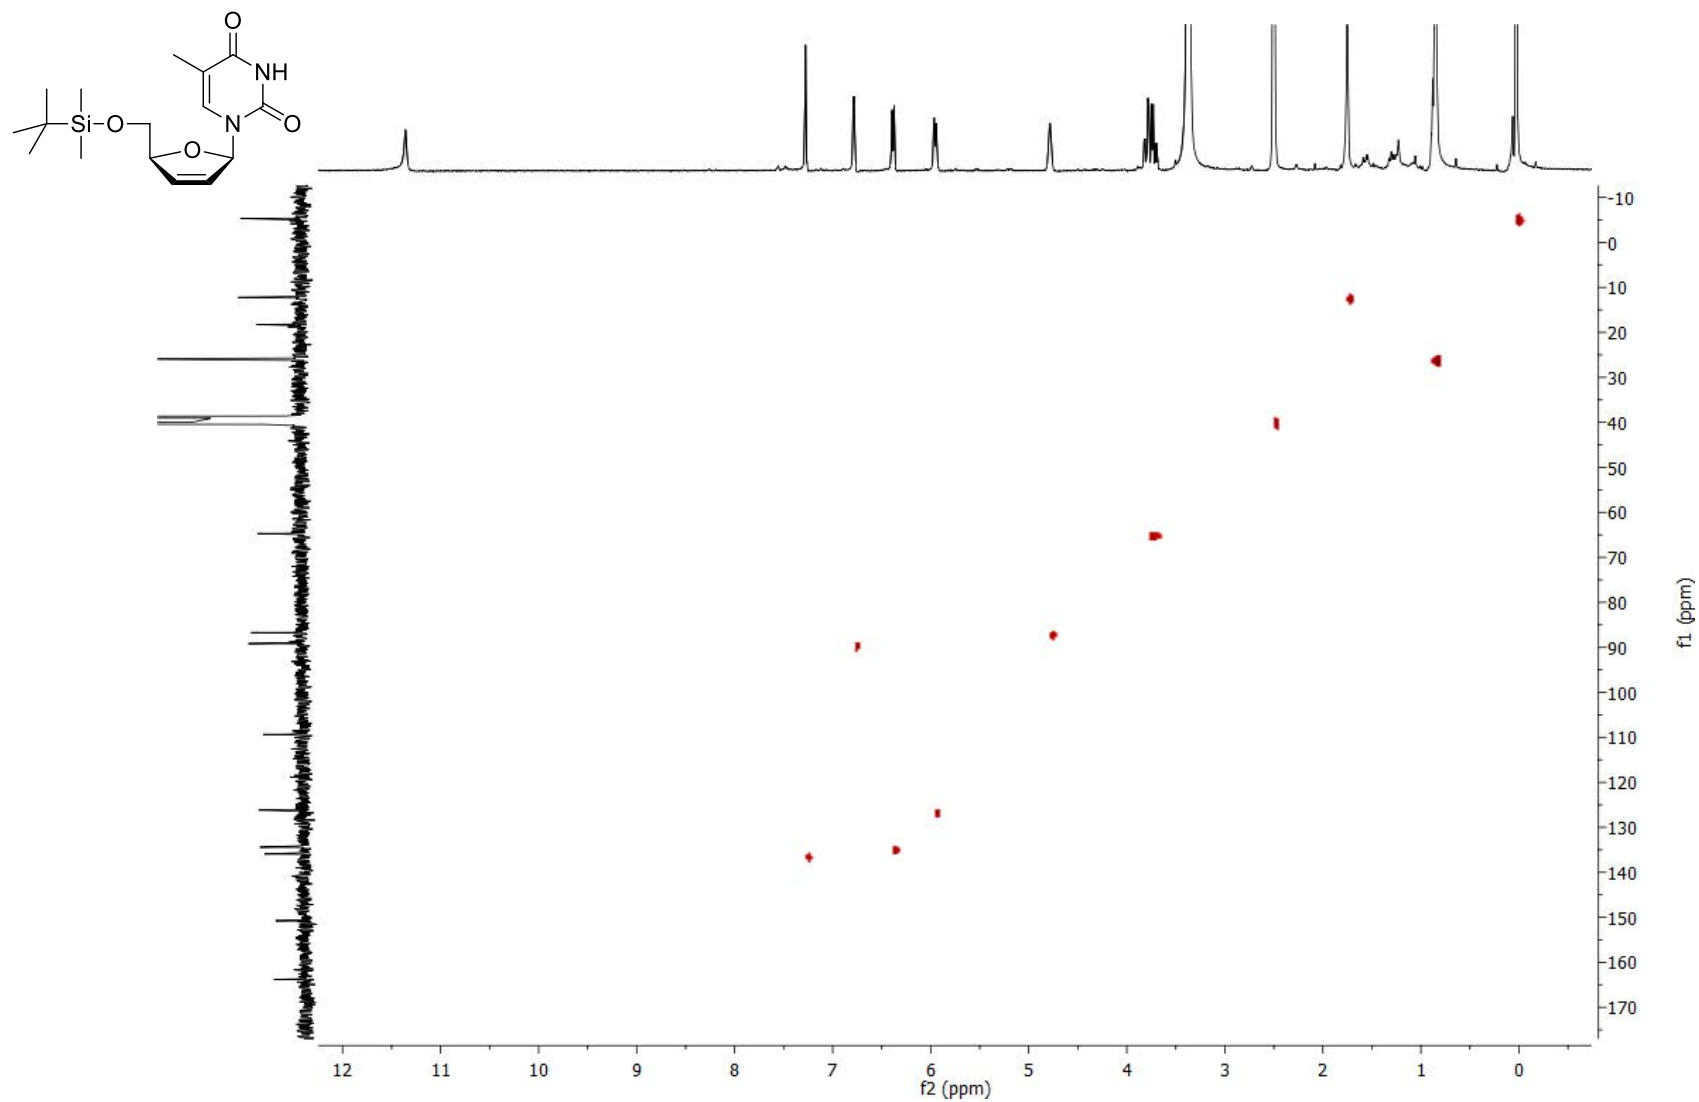

**5'-O-(*tert*-Butyldimethylsilyl)-2',3'-didehydro-2',3'-dideoxy- $\beta$ -D-cytidine (7c)**

$^1\text{H-NMR}$  (300.13 MHz,  $\text{CDCl}_3$ )

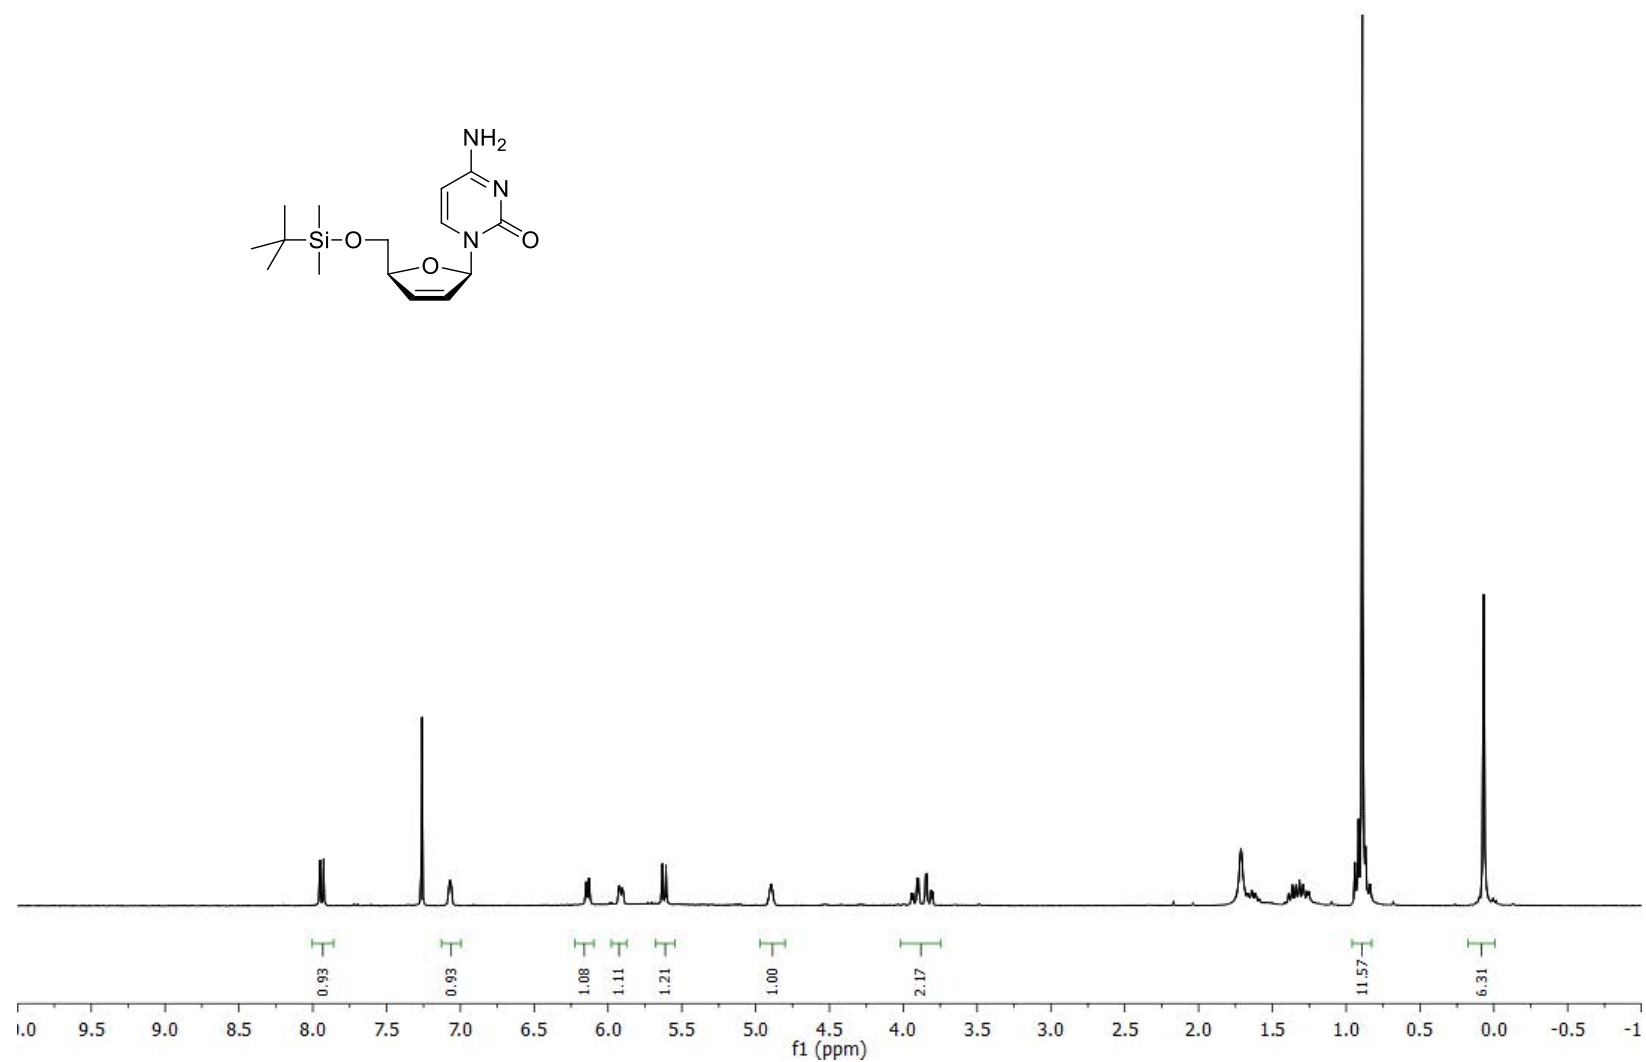

5'-O-(*tert*-Butyldimethylsilyl)-2',3'-didehydro-2',3'-dideoxy- $\beta$ -D-cytidine (7c)

$^{13}\text{C}$ -NMR (75.5 MHz,  $\text{CDCl}_3$ )

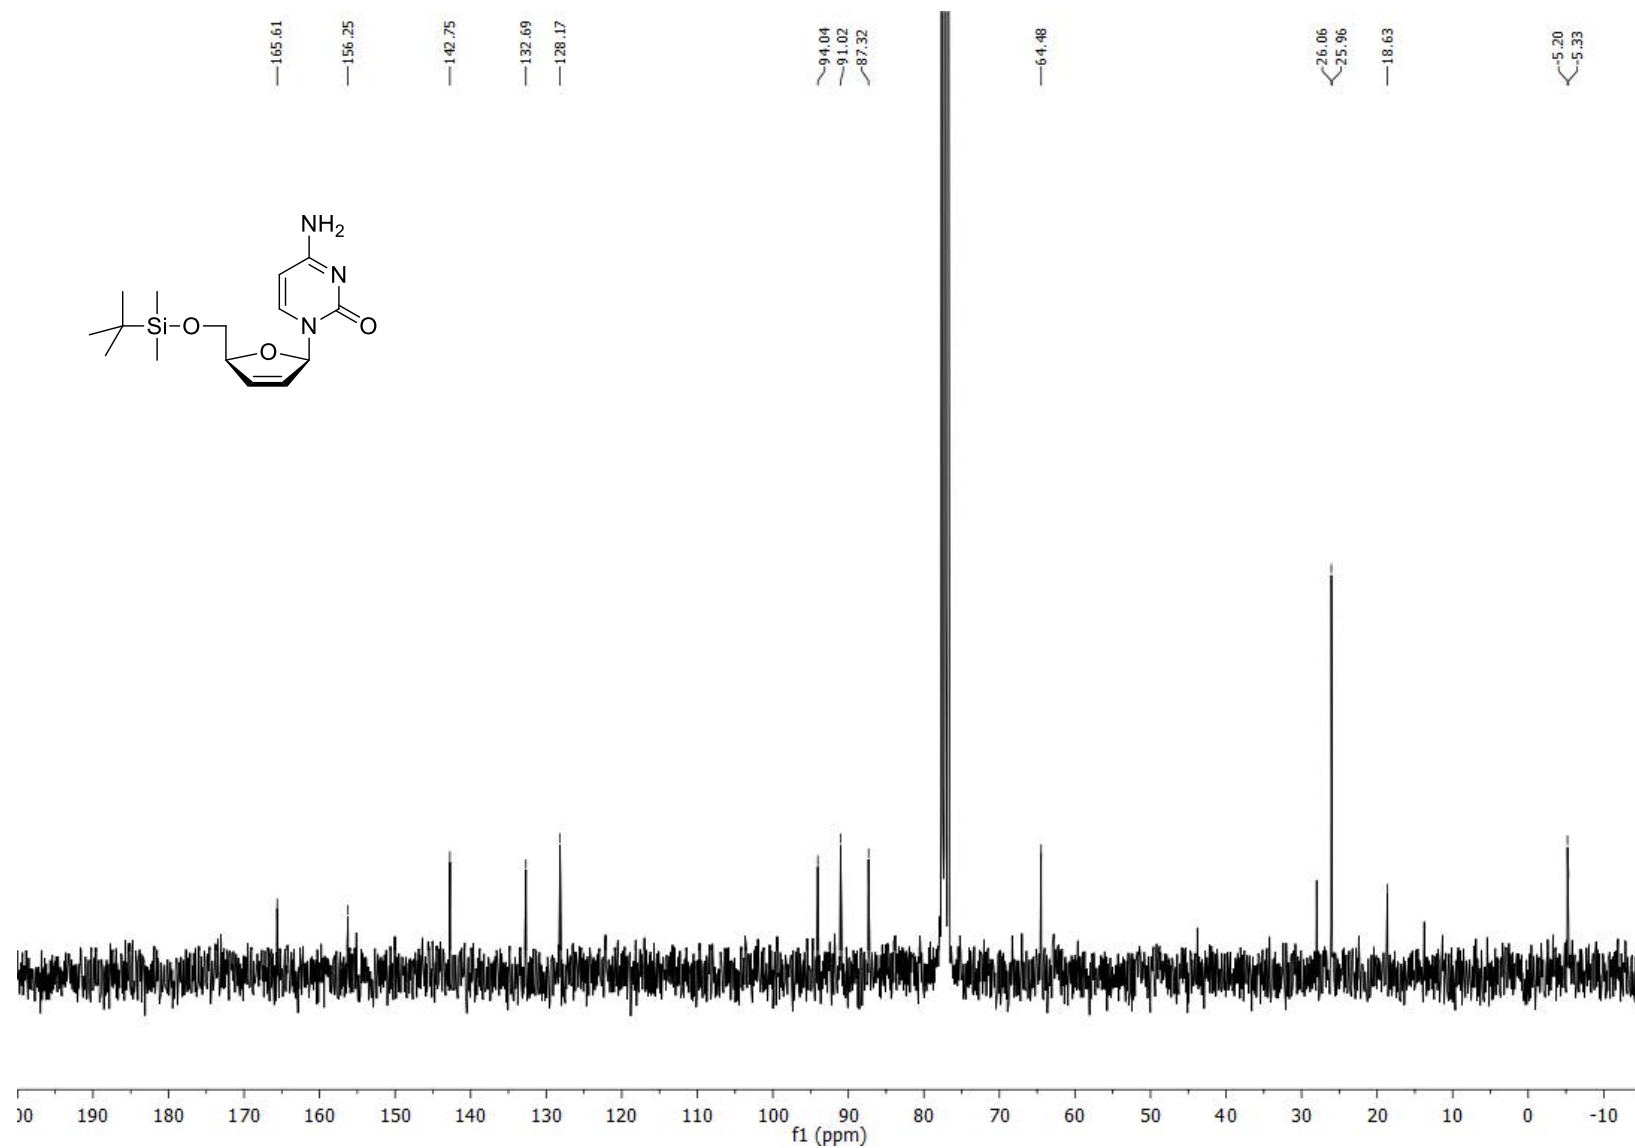



5'-O-(*tert*-Butyldimethylsilyl)-2',3'-didehydro-2',3'-dideoxy- $\beta$ -D-cytidine (7c)

DEPT NMR (75.5 MHz, CDCl<sub>3</sub>)

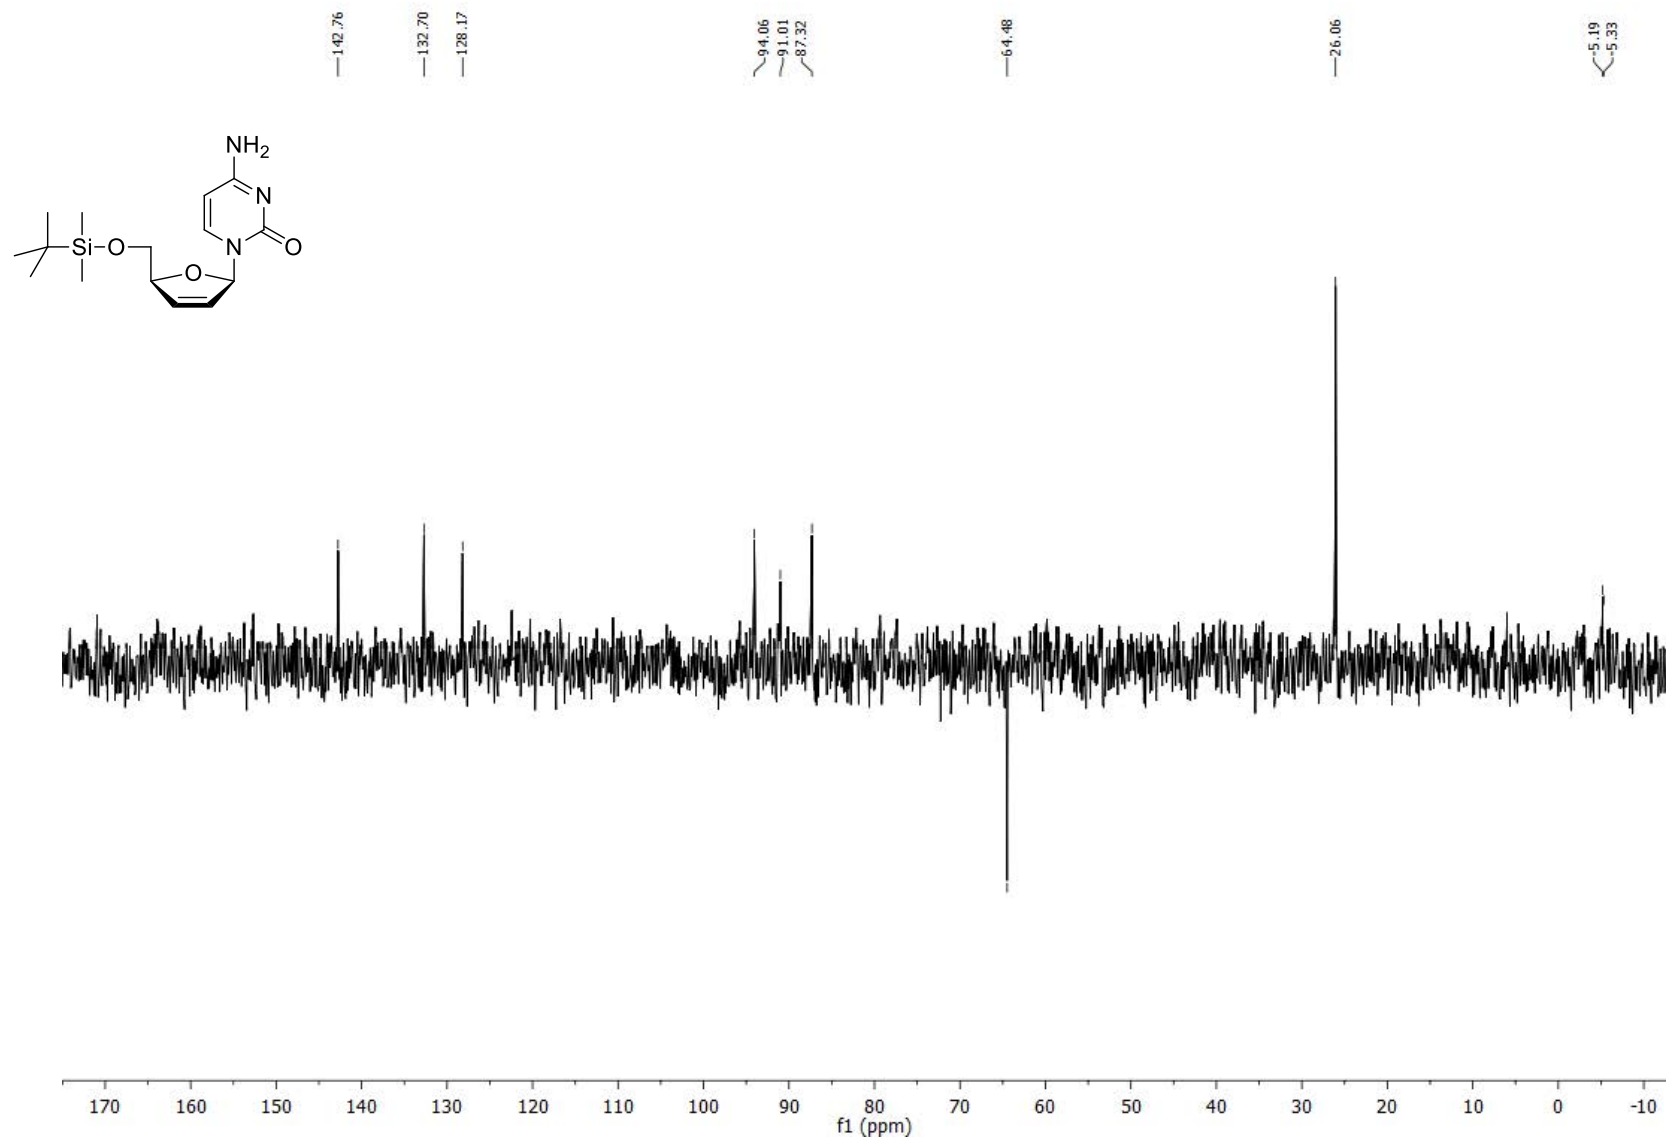

5'-O-(*tert*-Butyldimethylsilyl)-2',3'-didehydro-2',3'-dideoxy- $\beta$ -D-cytidine (7c)

COSY NMR (CDCl<sub>3</sub>)

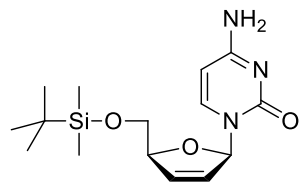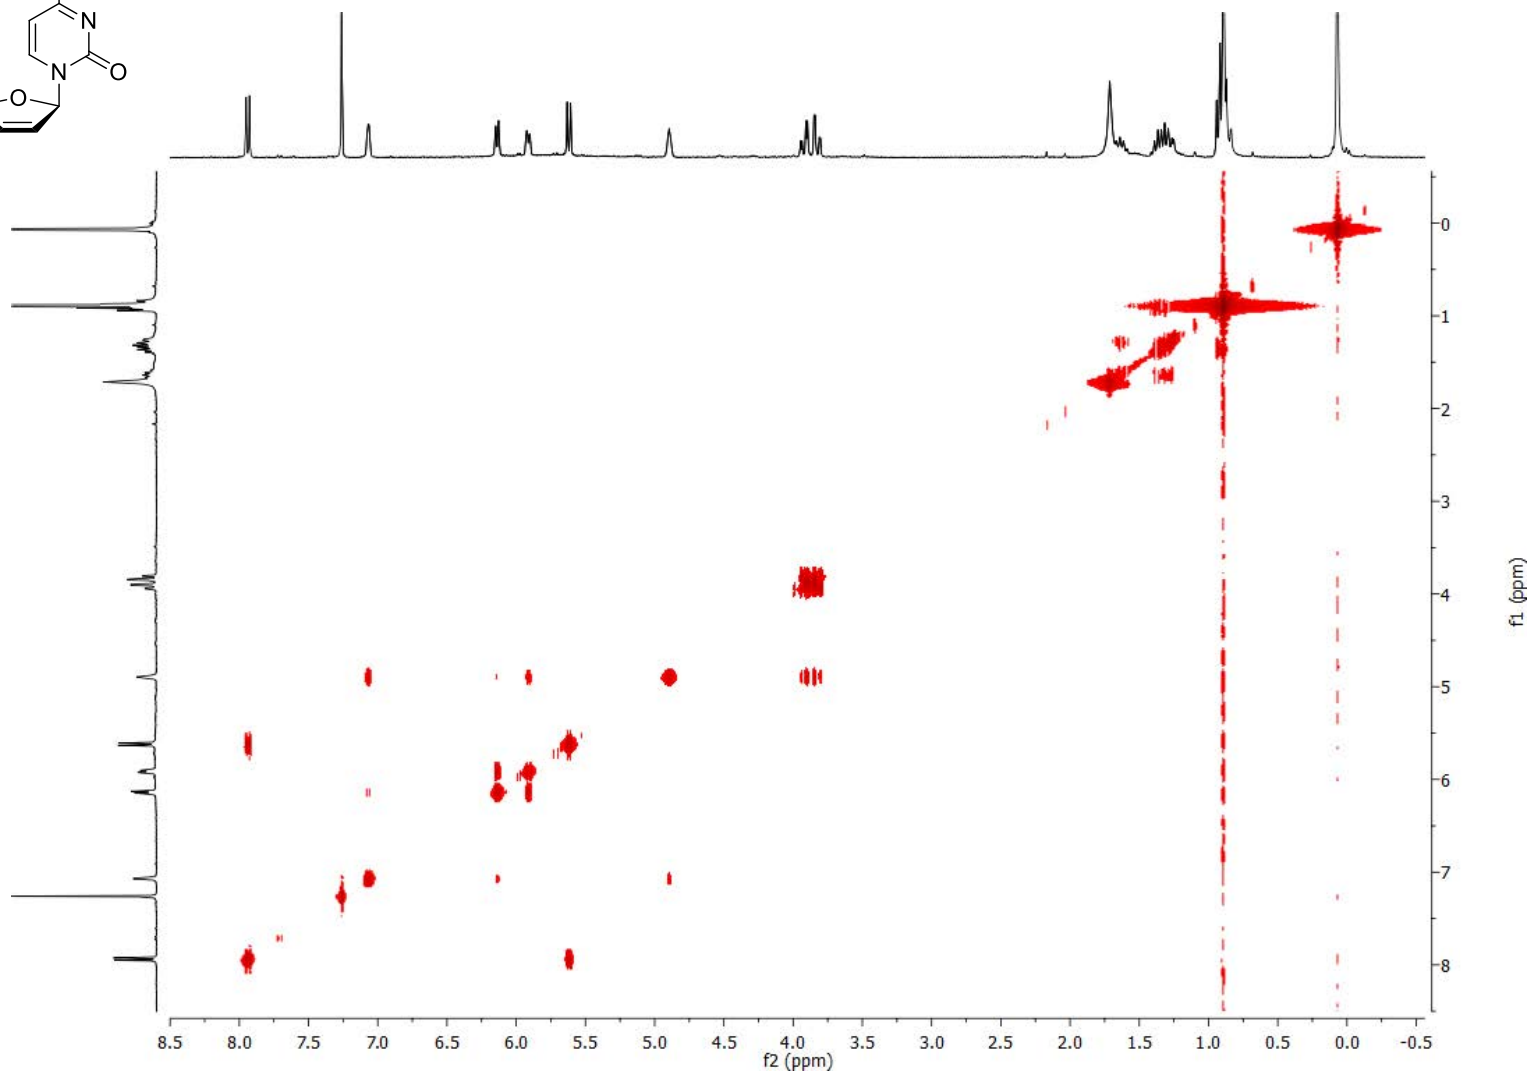

5'-O-(*tert*-Butyldimethylsilyl)-2',3'-didehydro-2',3'-dideoxy- $\beta$ -D-cytidine (7c)

HSQC NMR (CDCl<sub>3</sub>)

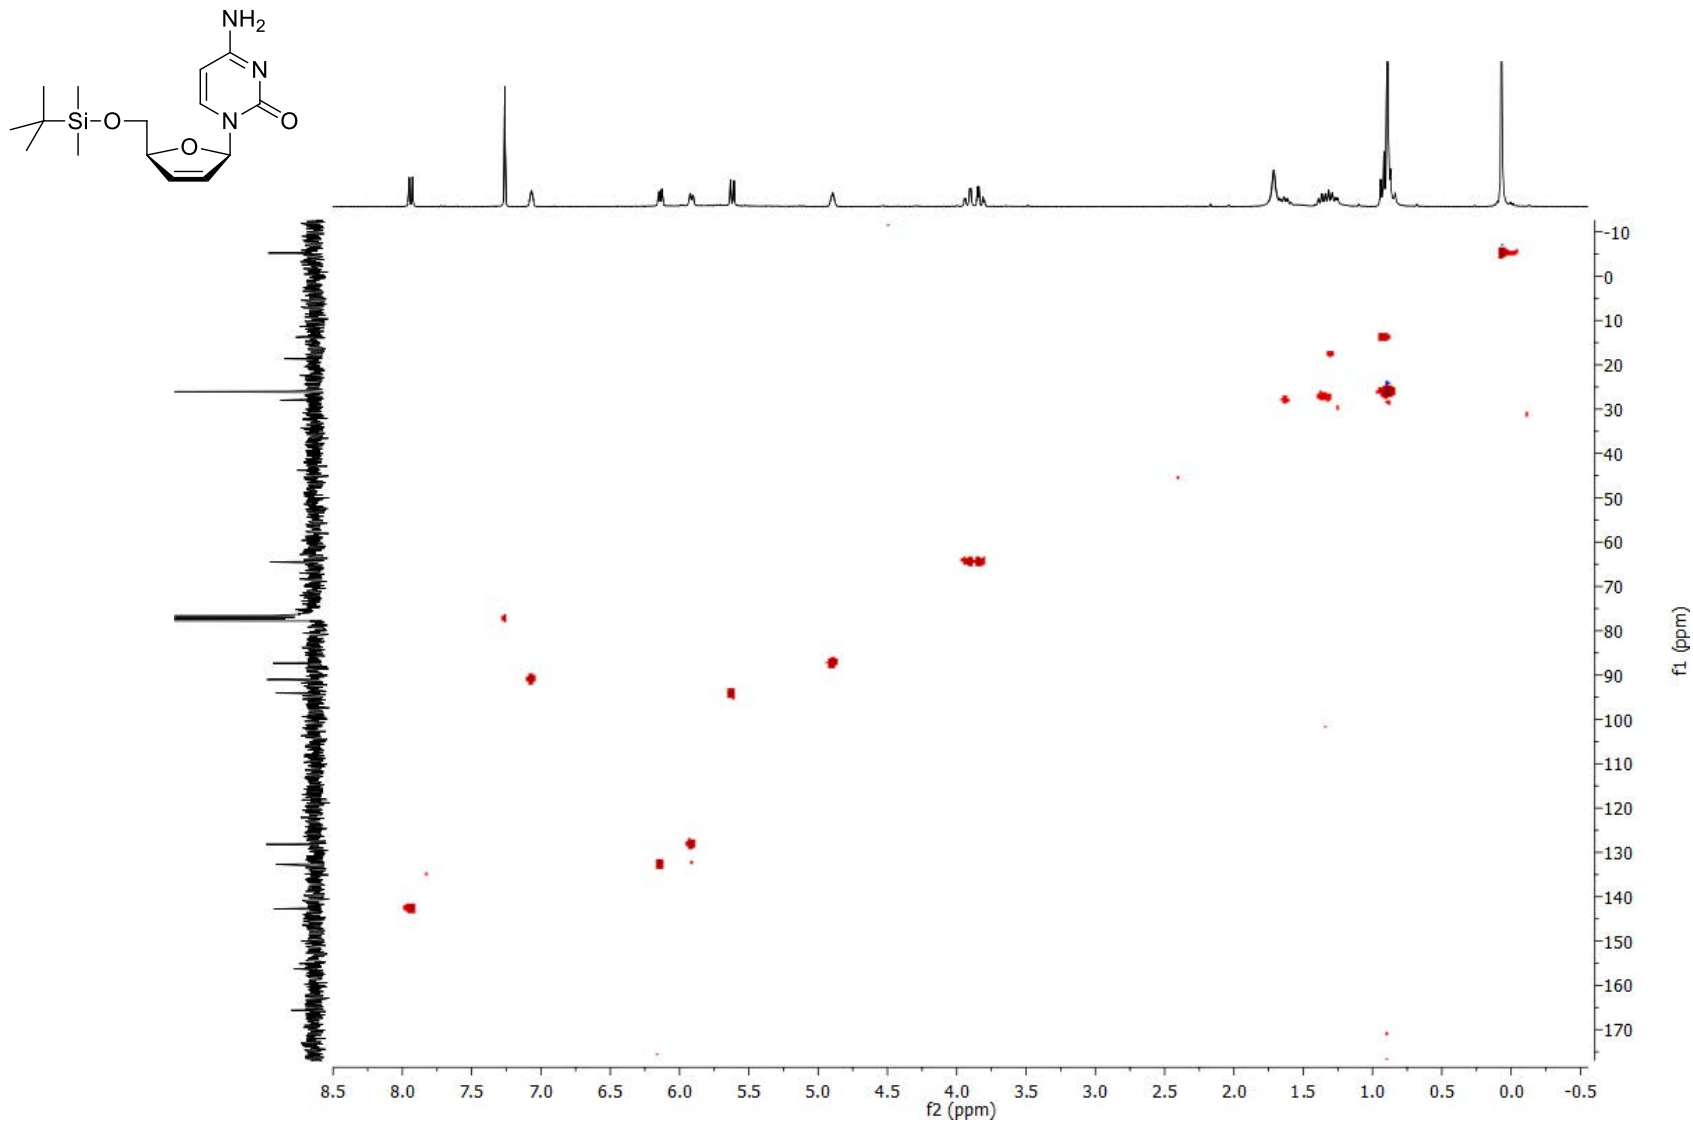

5'-*O*-(*tert*-Butyldimethylsilyl)-2',3'-didehydro-2',3'-dideoxy- $\beta$ -D-cytidine (7c)

HMBC NMR (CDCl<sub>3</sub>)

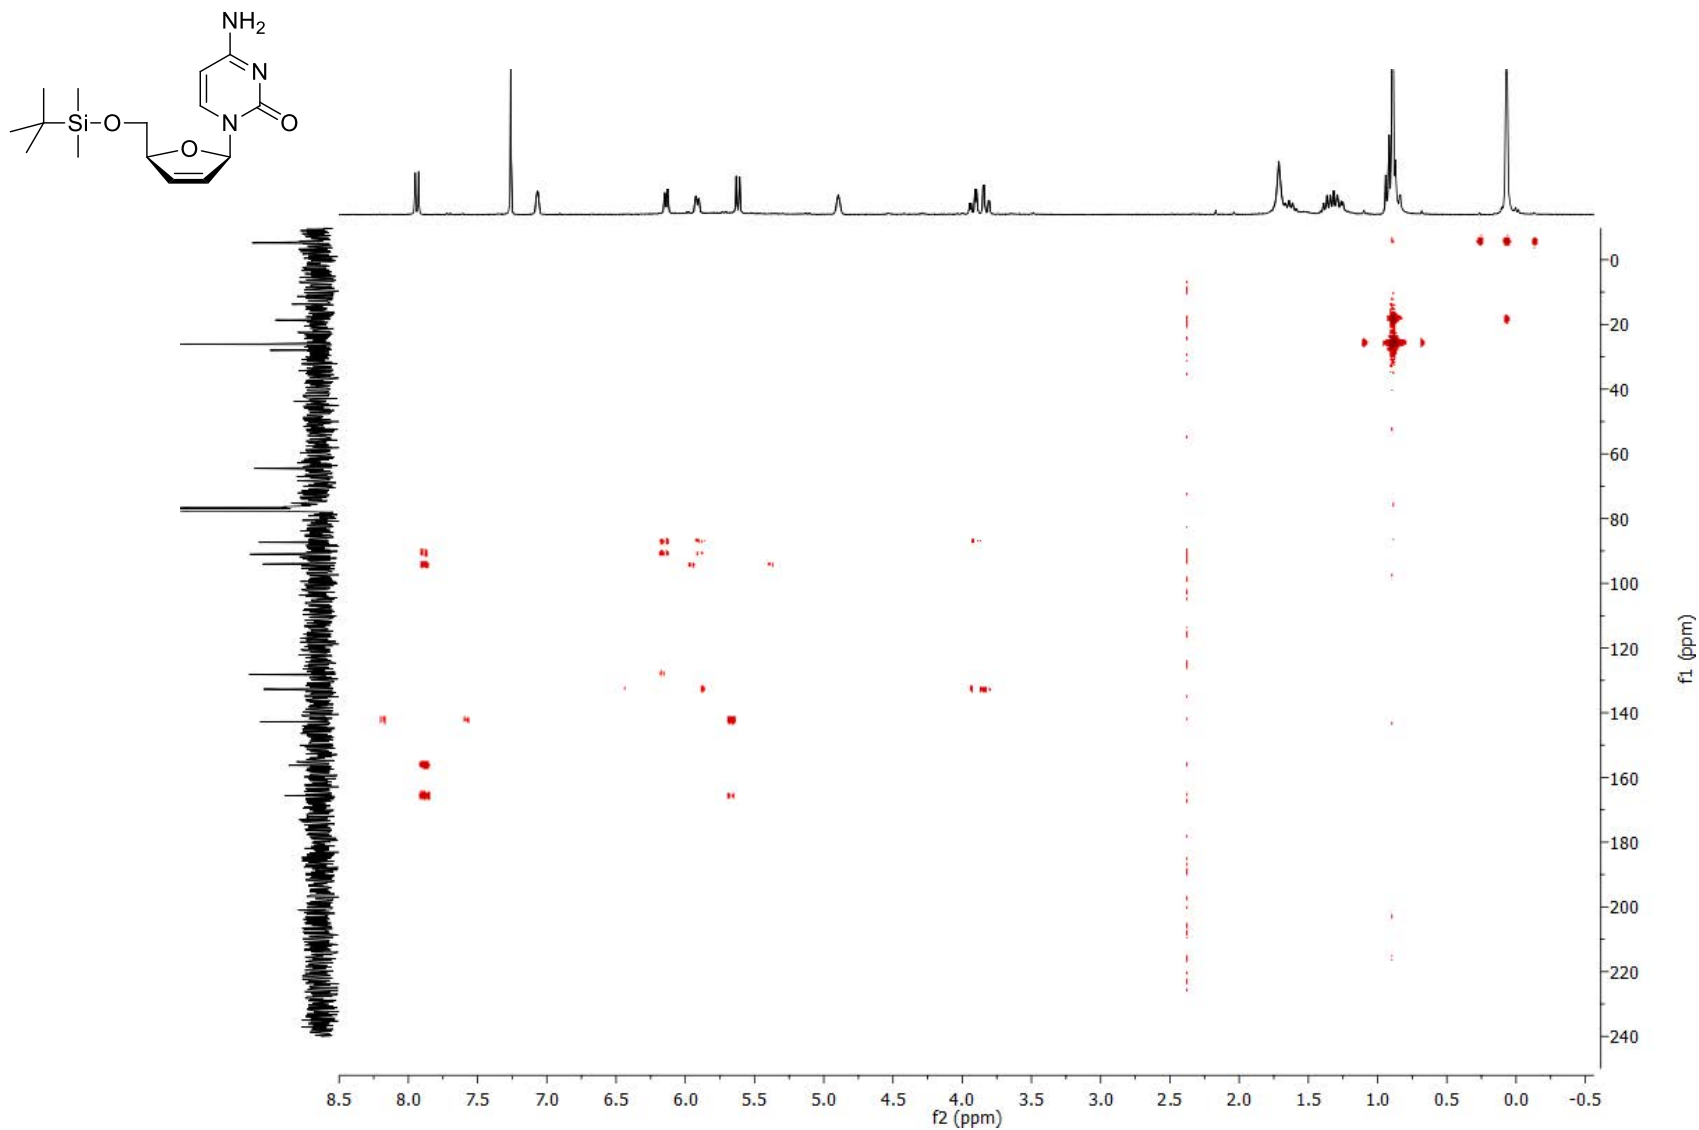

***N*<sup>4</sup>-Benzoyl-5'-*O*-(*tert*-butyldimethylsilyl)-2',3'-didehydro-2',3'-dideoxy- $\beta$ -D-cytidine (7d)**

<sup>1</sup>H-NMR (300.13 MHz, CDCl<sub>3</sub>)

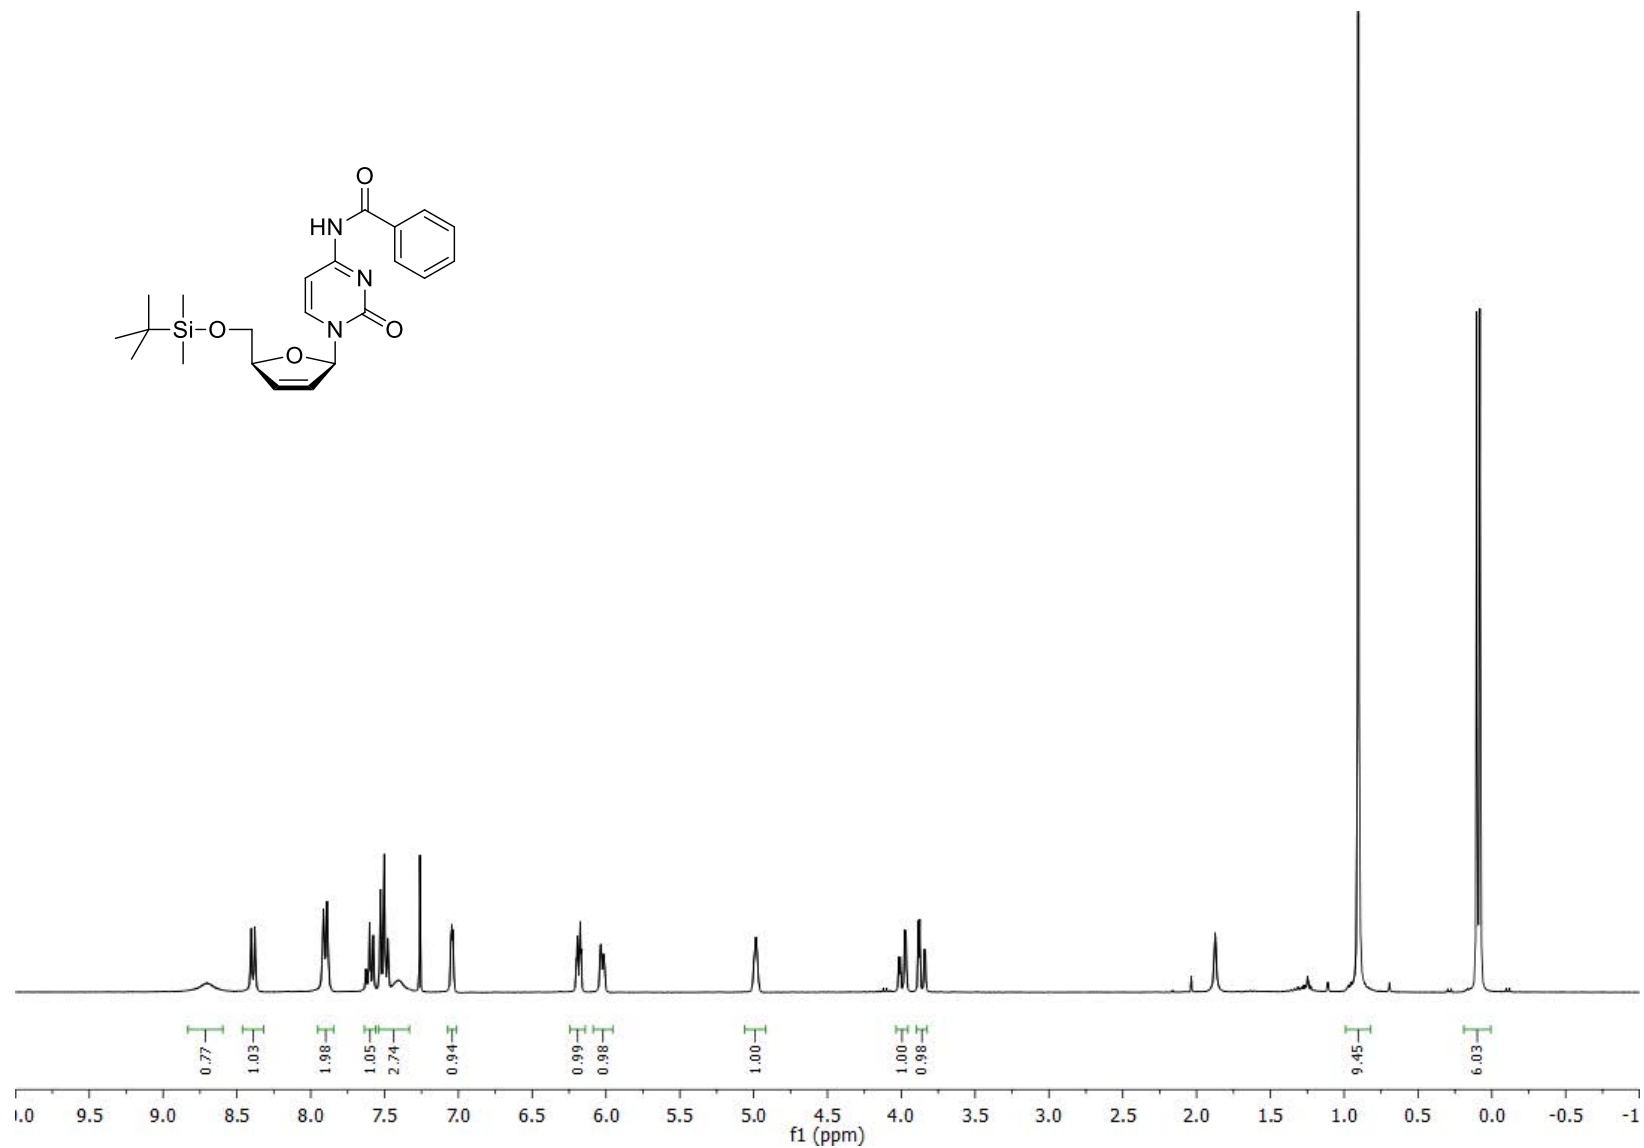

S101

***N*<sup>4</sup>-Benzoyl-5'-*O*-(*tert*-butyldimethylsilyl)-2',3'-didehydro-2',3'-dideoxy- $\beta$ -D-cytidine (7d)**

<sup>13</sup>C-NMR (75.5 MHz, CDCl<sub>3</sub>)

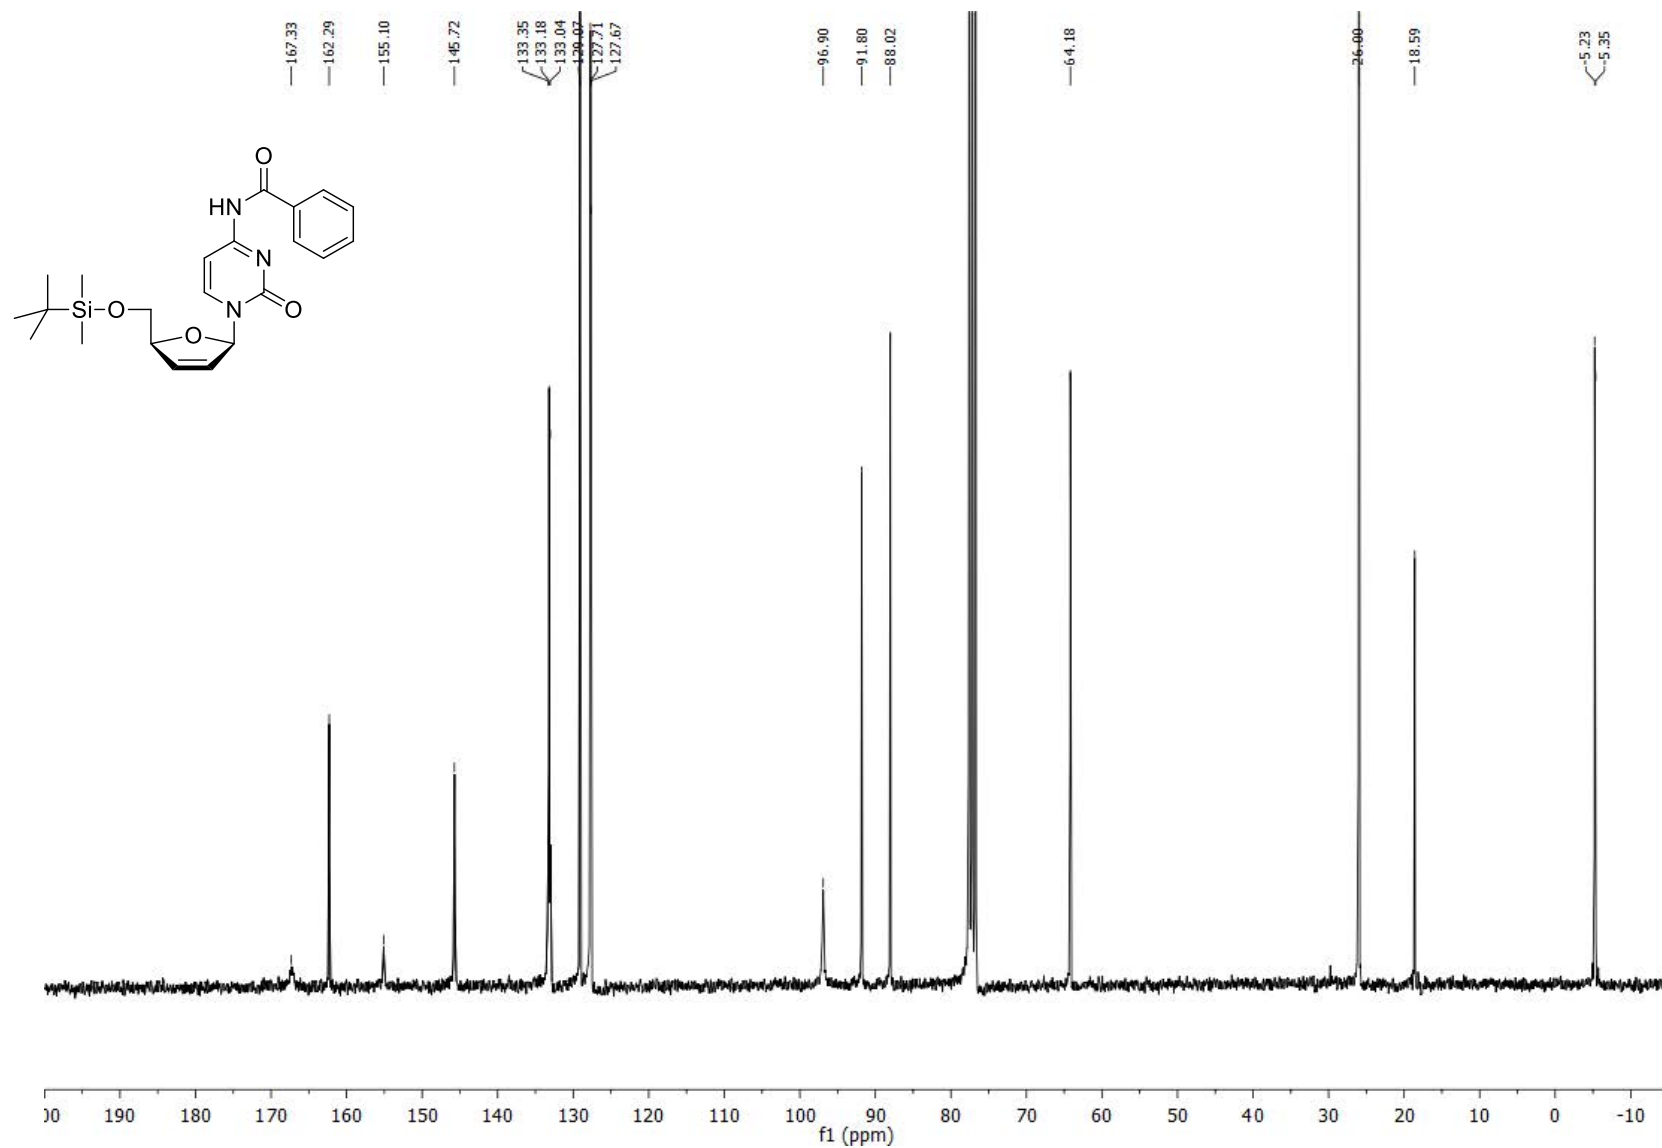

***N*<sup>4</sup>-Benzoyl-5'-*O*-(*tert*-butyldimethylsilyl)-2',3'-didehydro-2',3'-dideoxy-β-D-cytidine (7d)**

DEPT NMR (75.5 MHz, CDCl<sub>3</sub>)

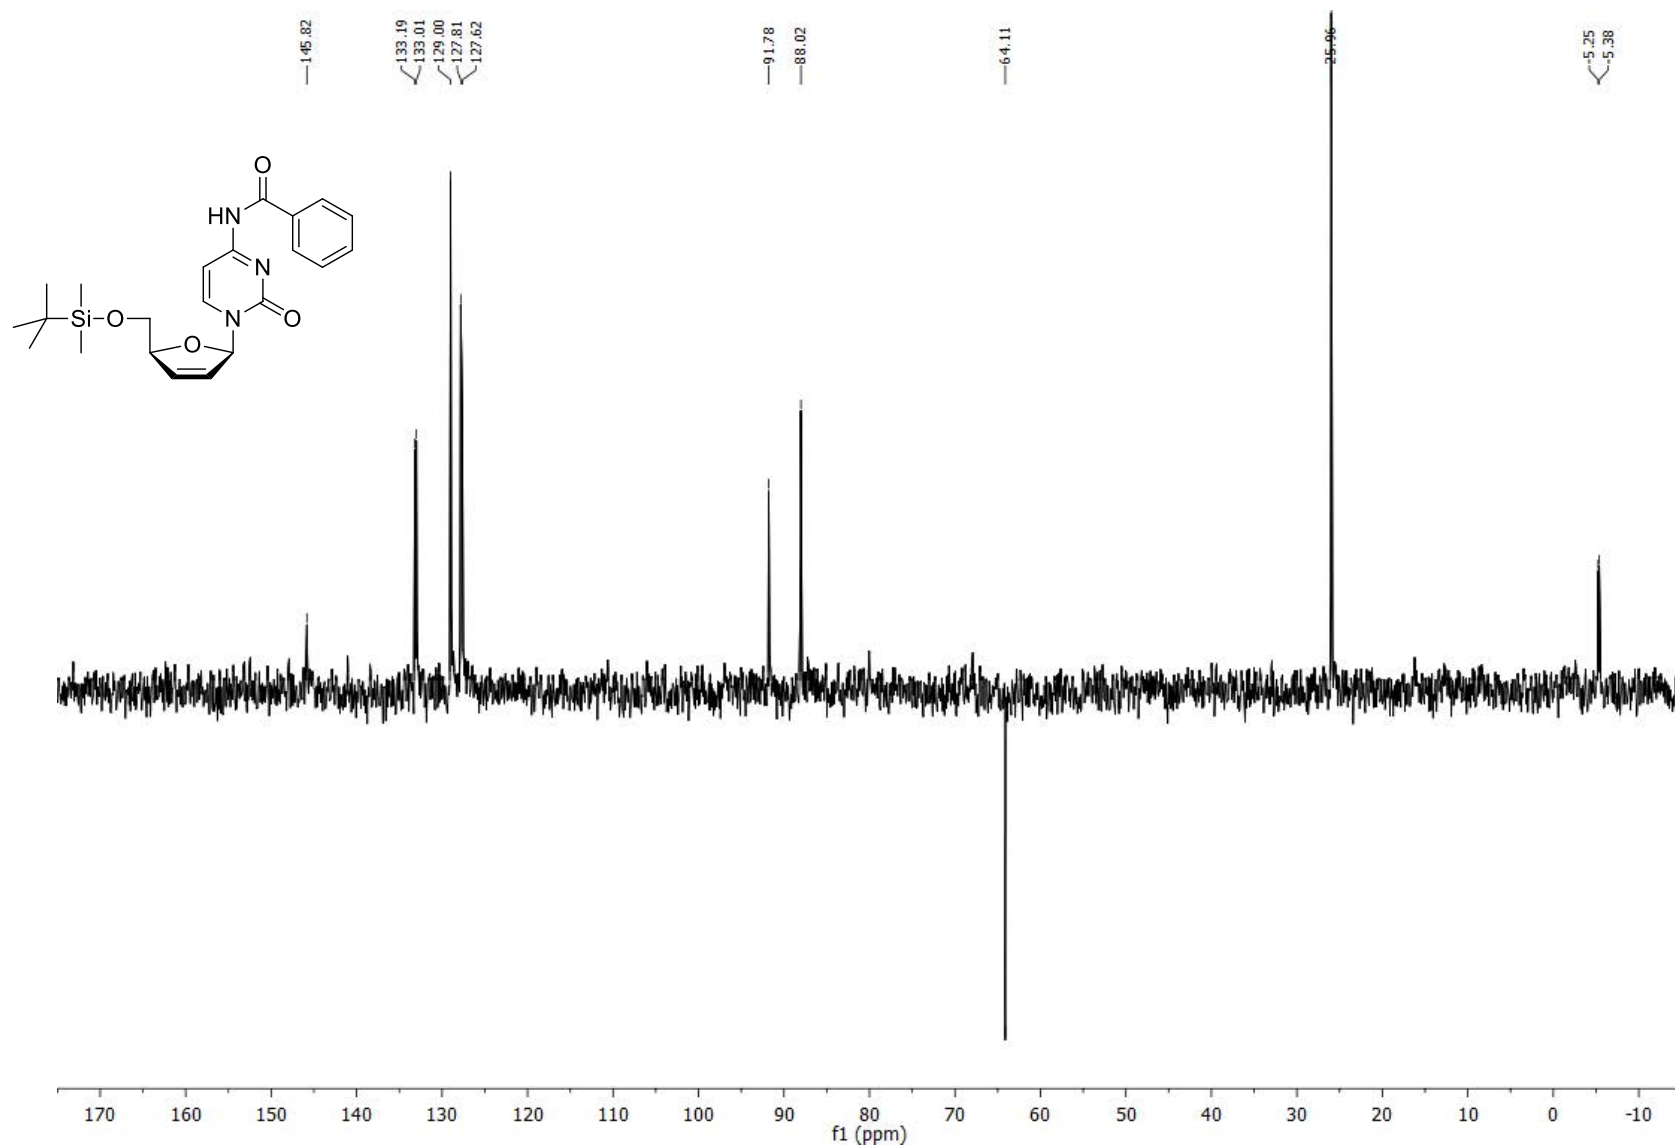

S103

*N*<sup>4</sup>-Benzoyl-5'-*O*-(*tert*-butyldimethylsilyl)-2',3'-didehydro-2',3'-dideoxy-β-D-cytidine (7d)

COSY NMR (CDCl<sub>3</sub>)

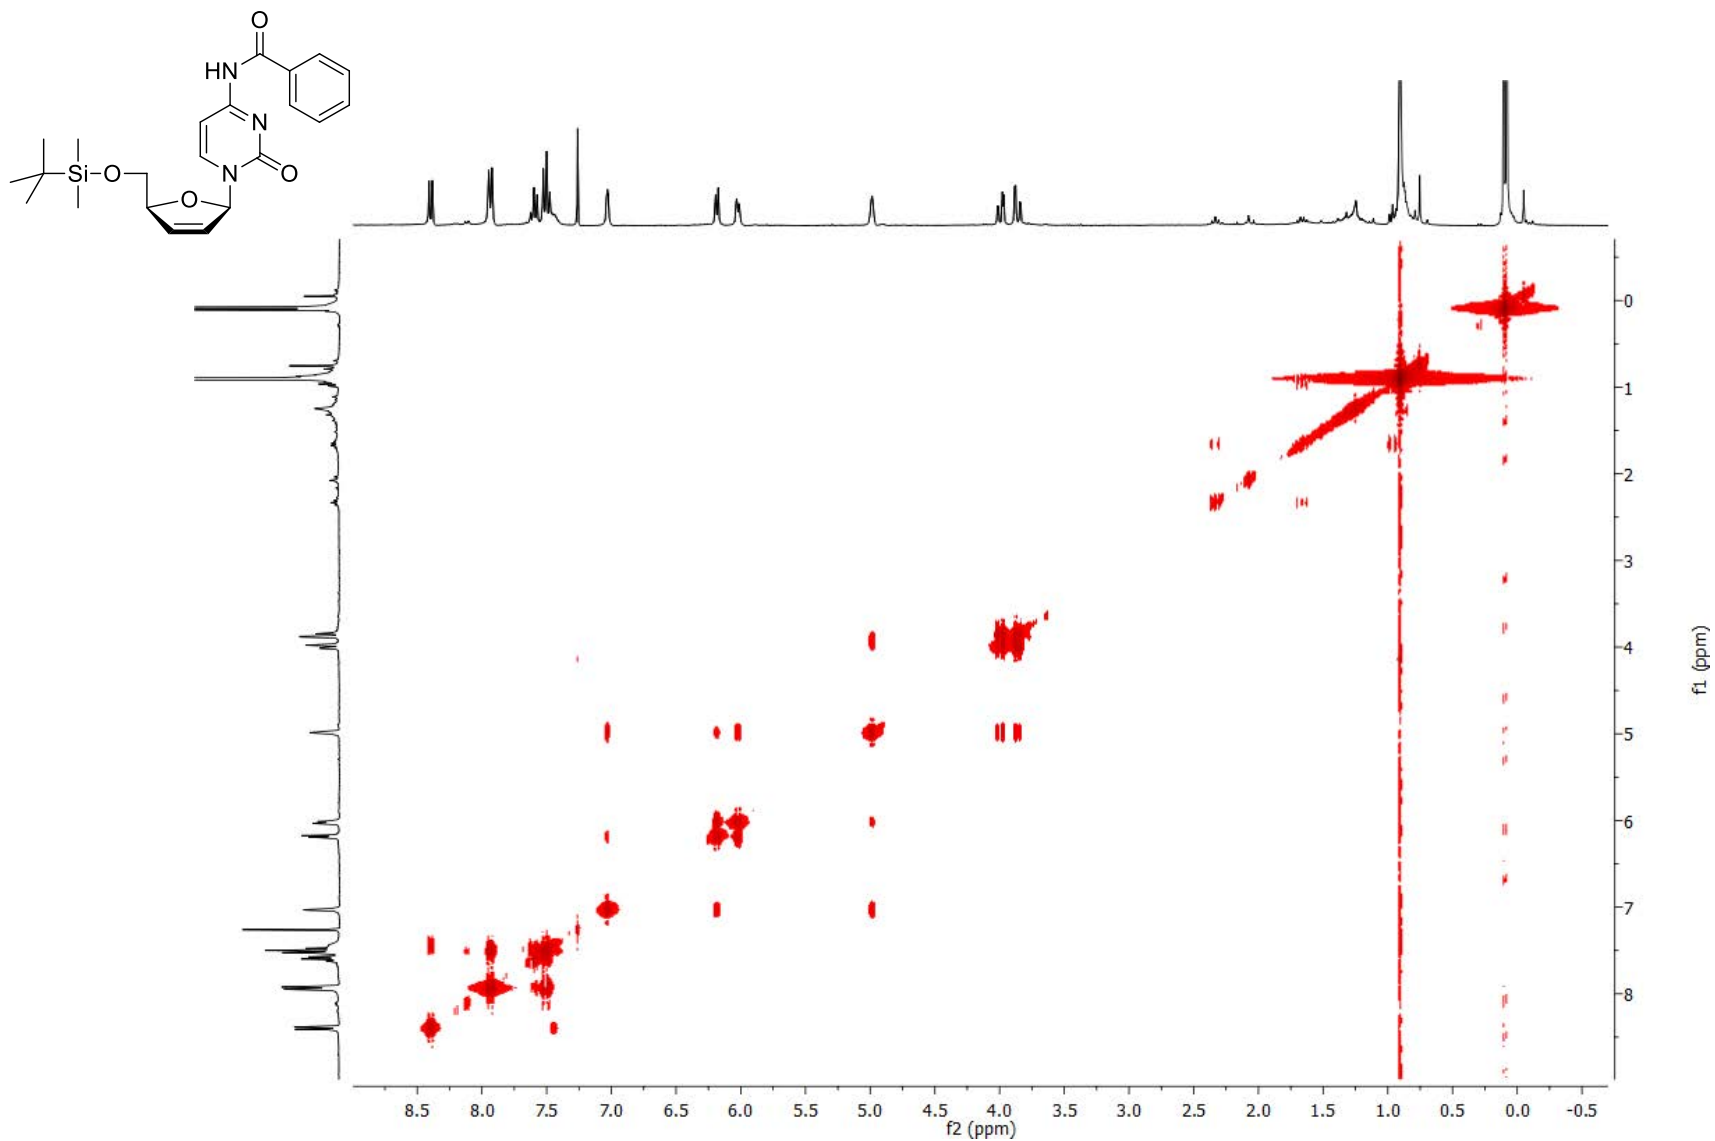



*N*<sup>4</sup>-Benzoyl-5'-*O*-(*tert*-butyldimethylsilyl)-2',3'-didehydro-2',3'-dideoxy-β-D-cytidine (7d)

HSQC NMR (CDCl<sub>3</sub>)

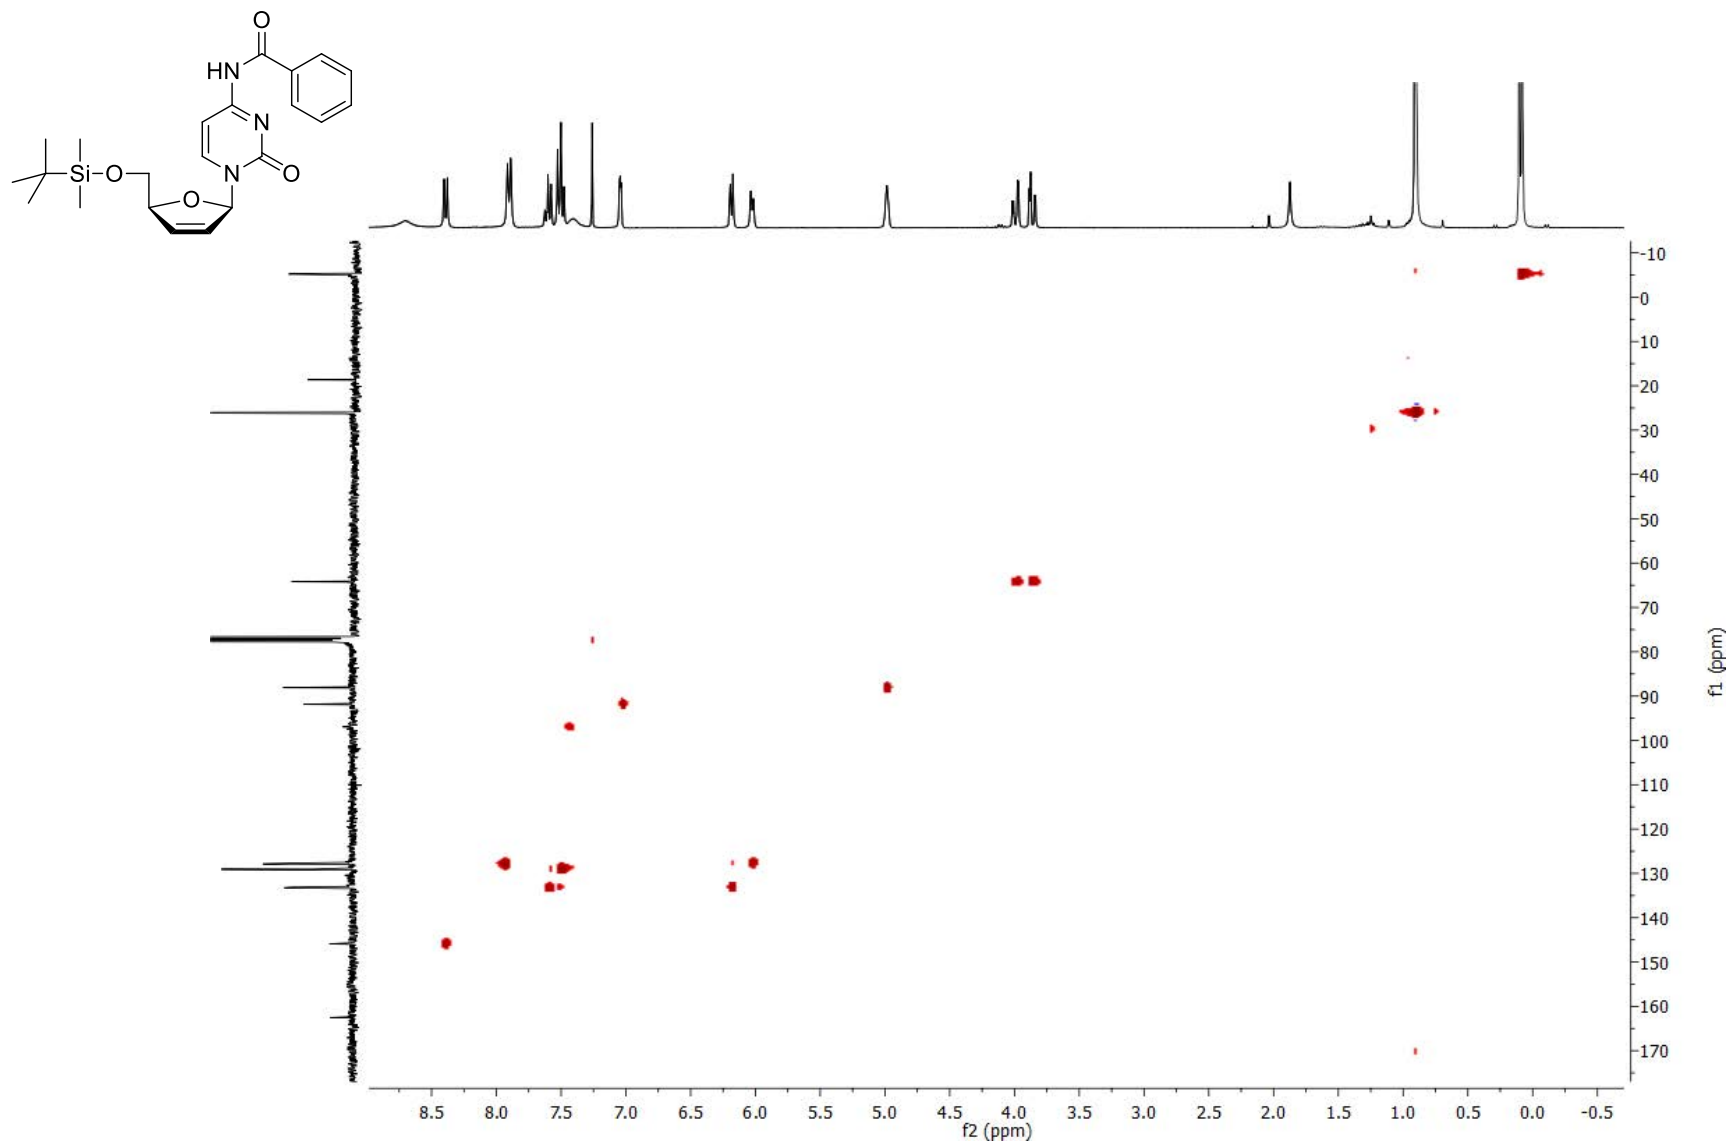

*N*<sup>4</sup>-Benzoyl-5'-*O*-(*tert*-butyldimethylsilyl)-2',3'-didehydro-2',3'-dideoxy-β-D-cytidine (7d)

HMBC NMR (CDCl<sub>3</sub>)

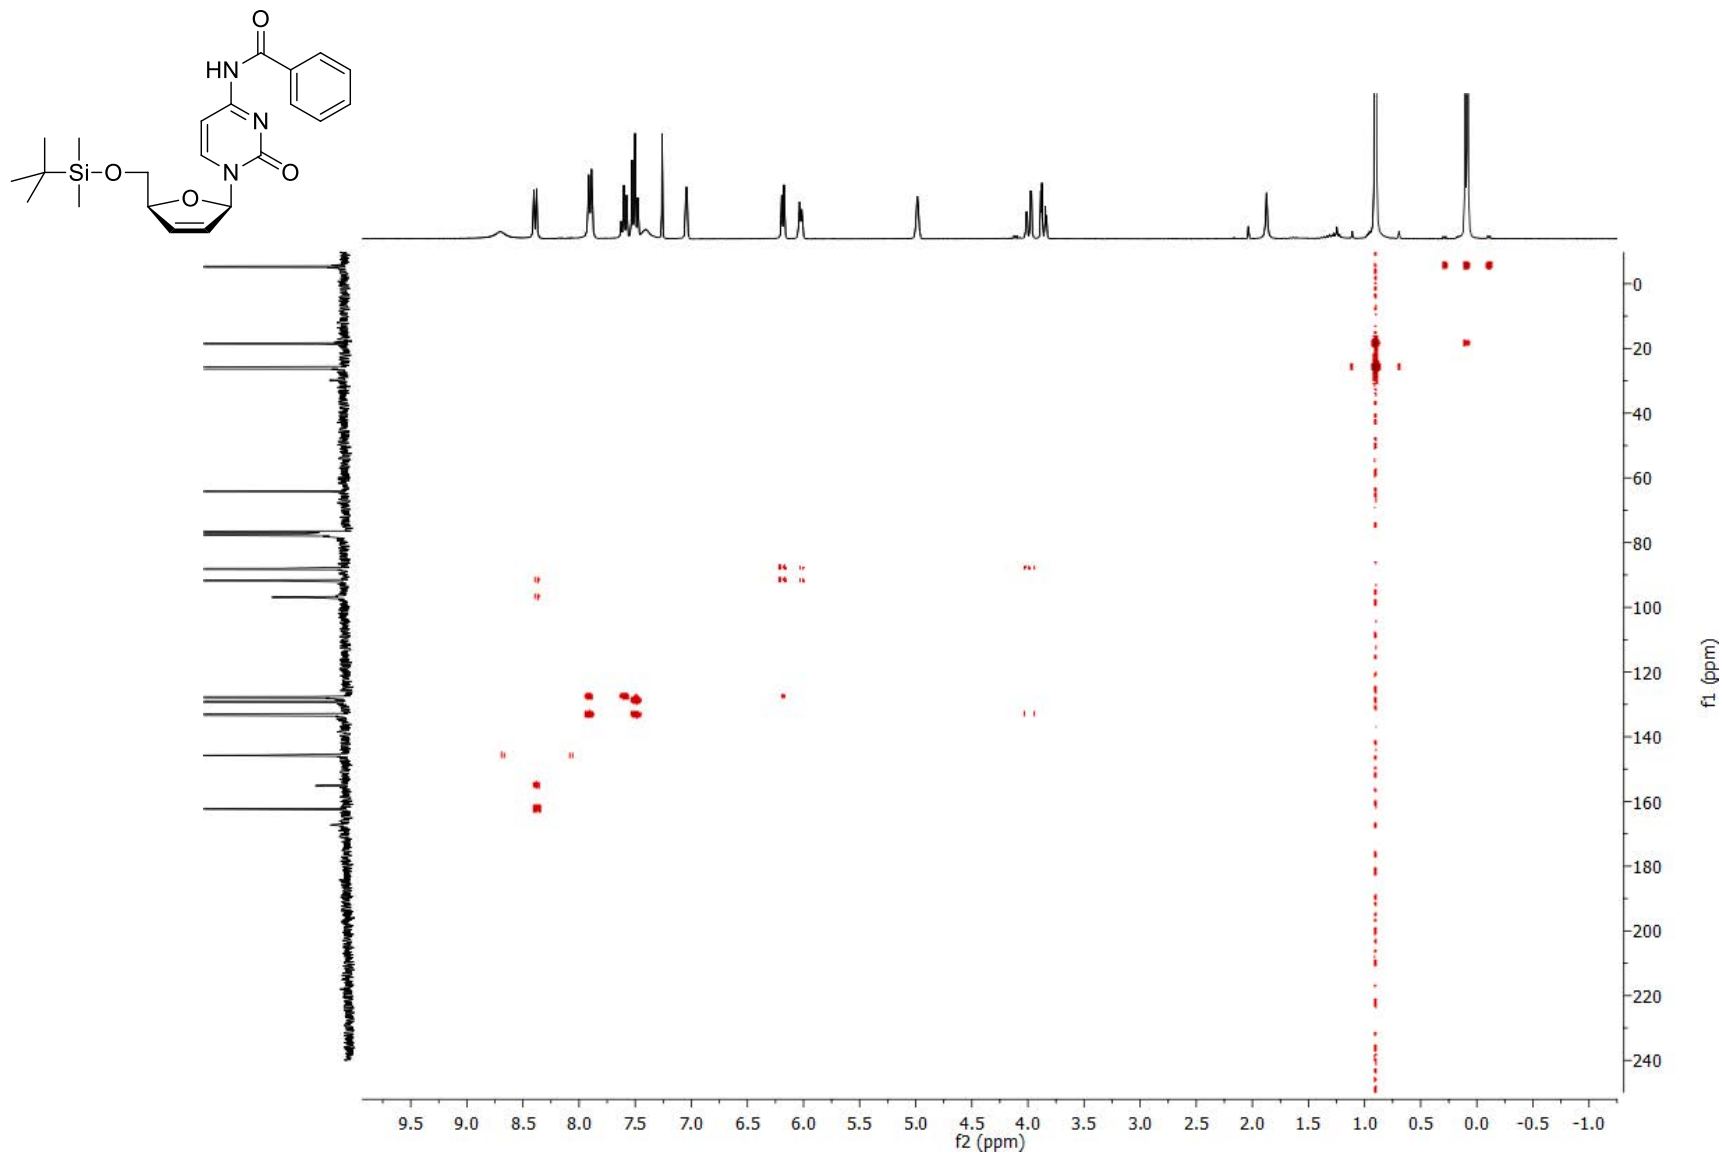

5'-O-(*tert*-Butyldimethylsilyl)-2',3'-didehydro-2',3'-dideoxy- $\beta$ -D-adenosine (7e)

$^1\text{H}$ -NMR (300.13 MHz,  $\text{CDCl}_3$ )

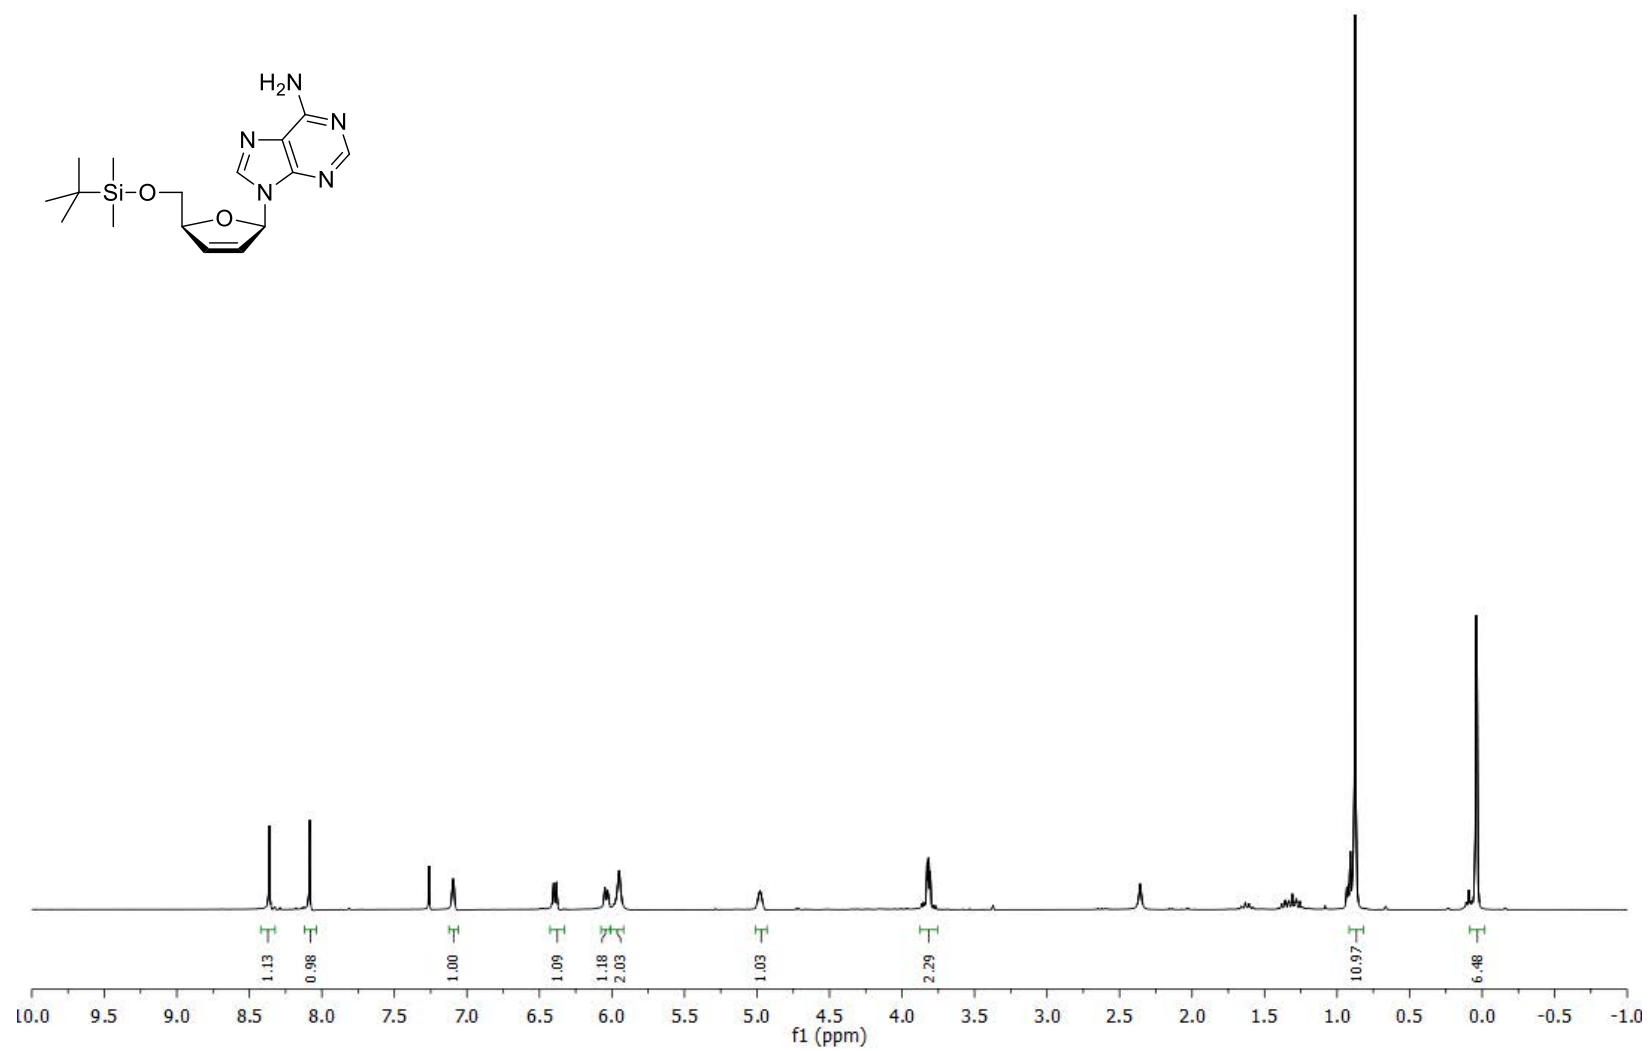

**5'-O-(*tert*-Butyldimethylsilyl)-2',3'-dideoxy-2',3'-dideoxy-β-D-adenosine (7e)**

$^{13}\text{C}$ -NMR (75.5 MHz,  $\text{CDCl}_3$ )

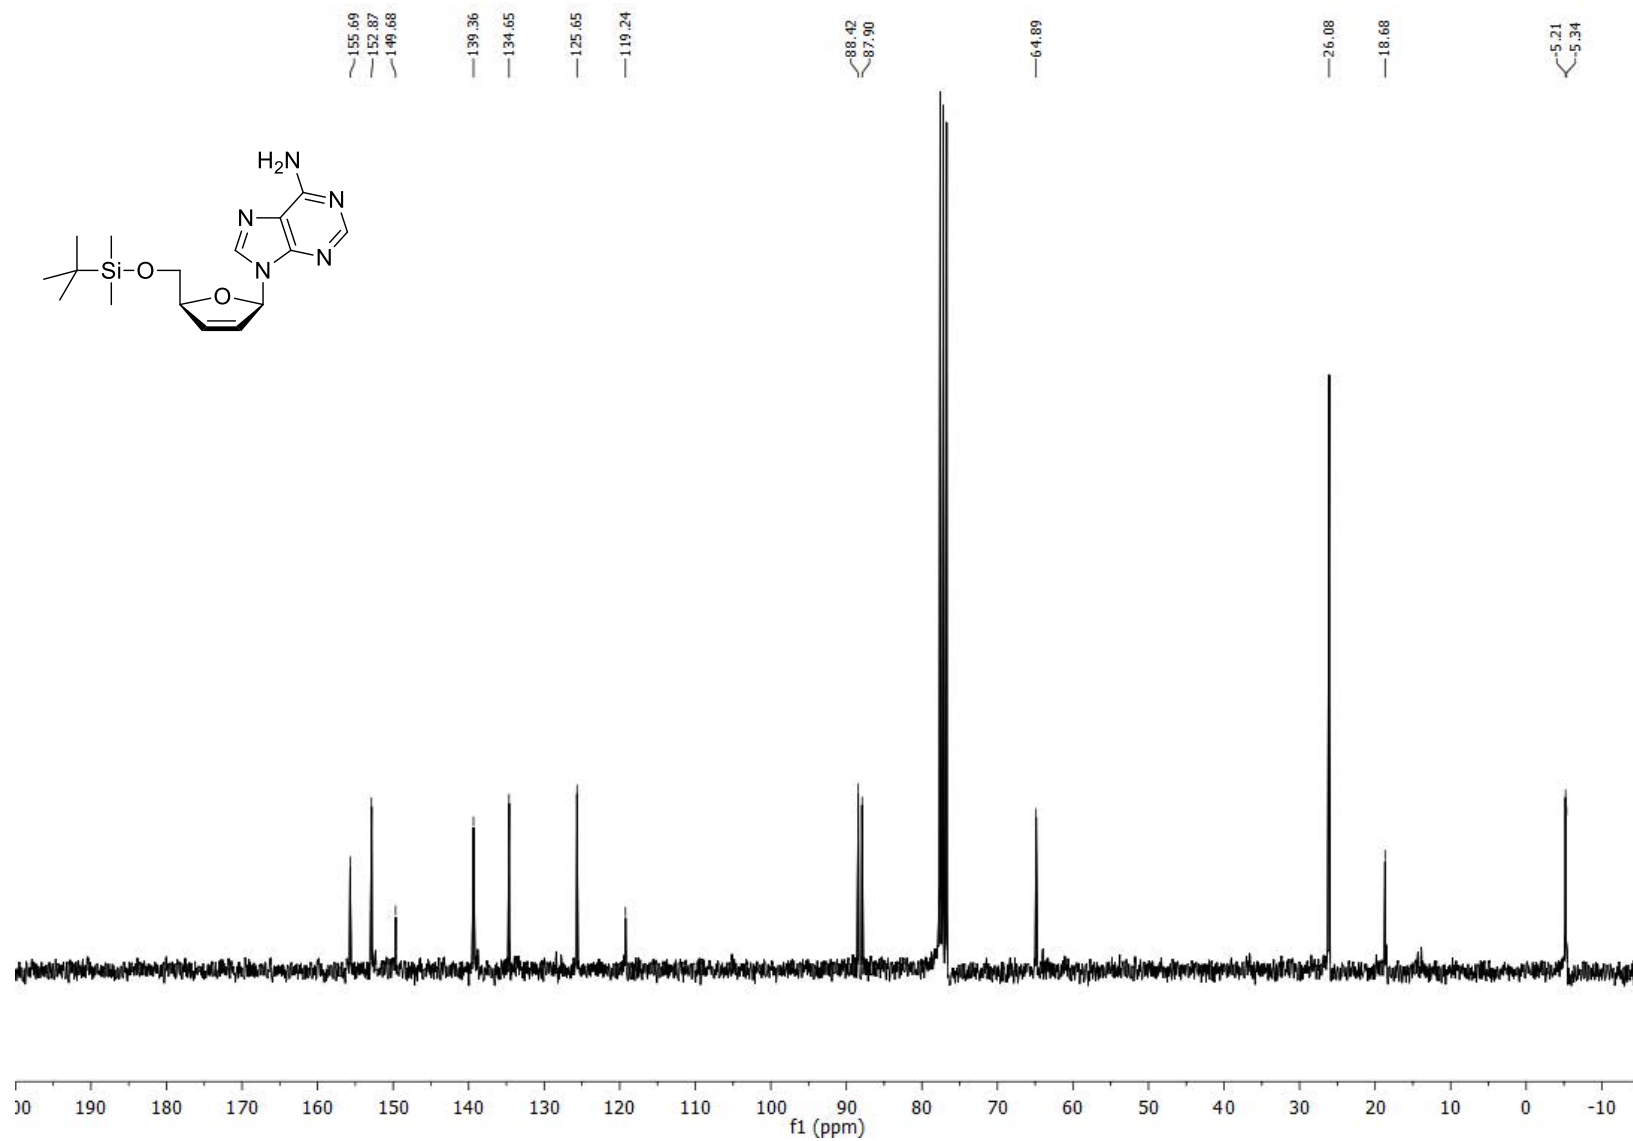

5'-O-(*tert*-Butyldimethylsilyl)-2',3'-didehydro-2',3'-dideoxy- $\beta$ -D-adenosine (7e)

DEPT NMR (75.5 MHz, CDCl<sub>3</sub>)

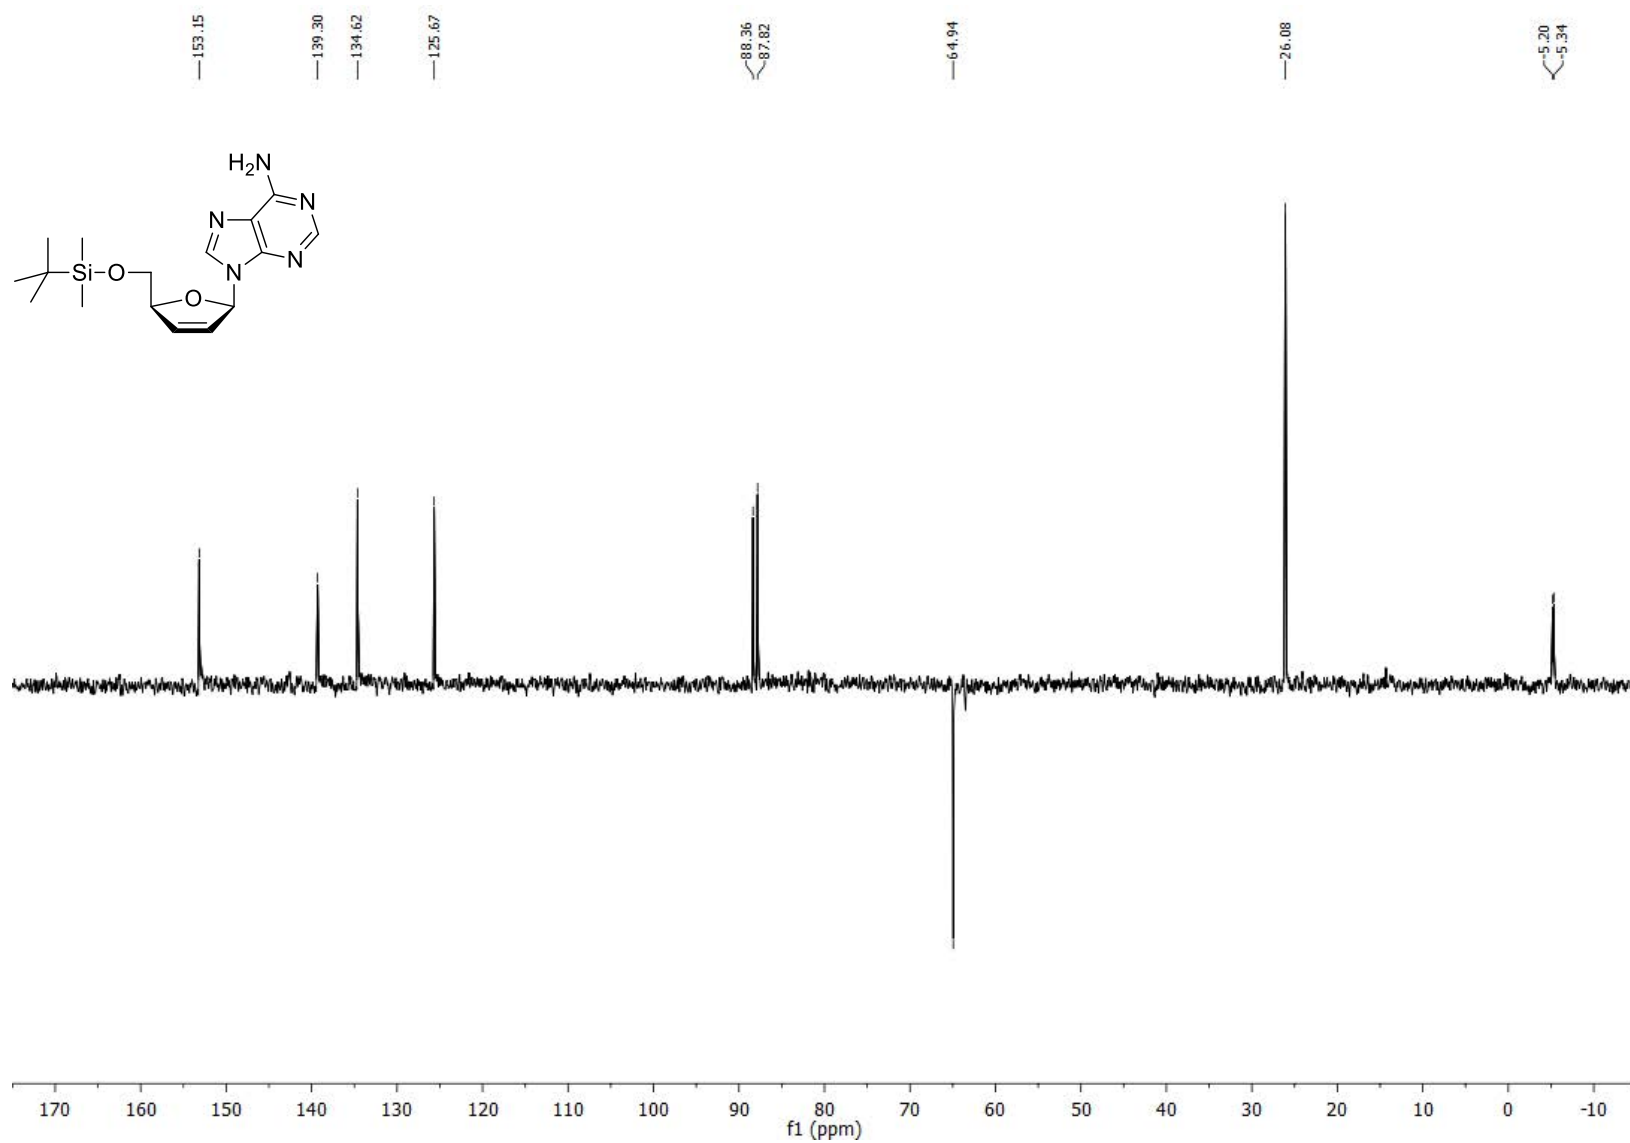

S109

5'-*O*-(*tert*-Butyldimethylsilyl)-2',3'-didehydro-2',3'-dideoxy- $\beta$ -D-adenosine (7e)

COSY NMR (CDCl<sub>3</sub>)

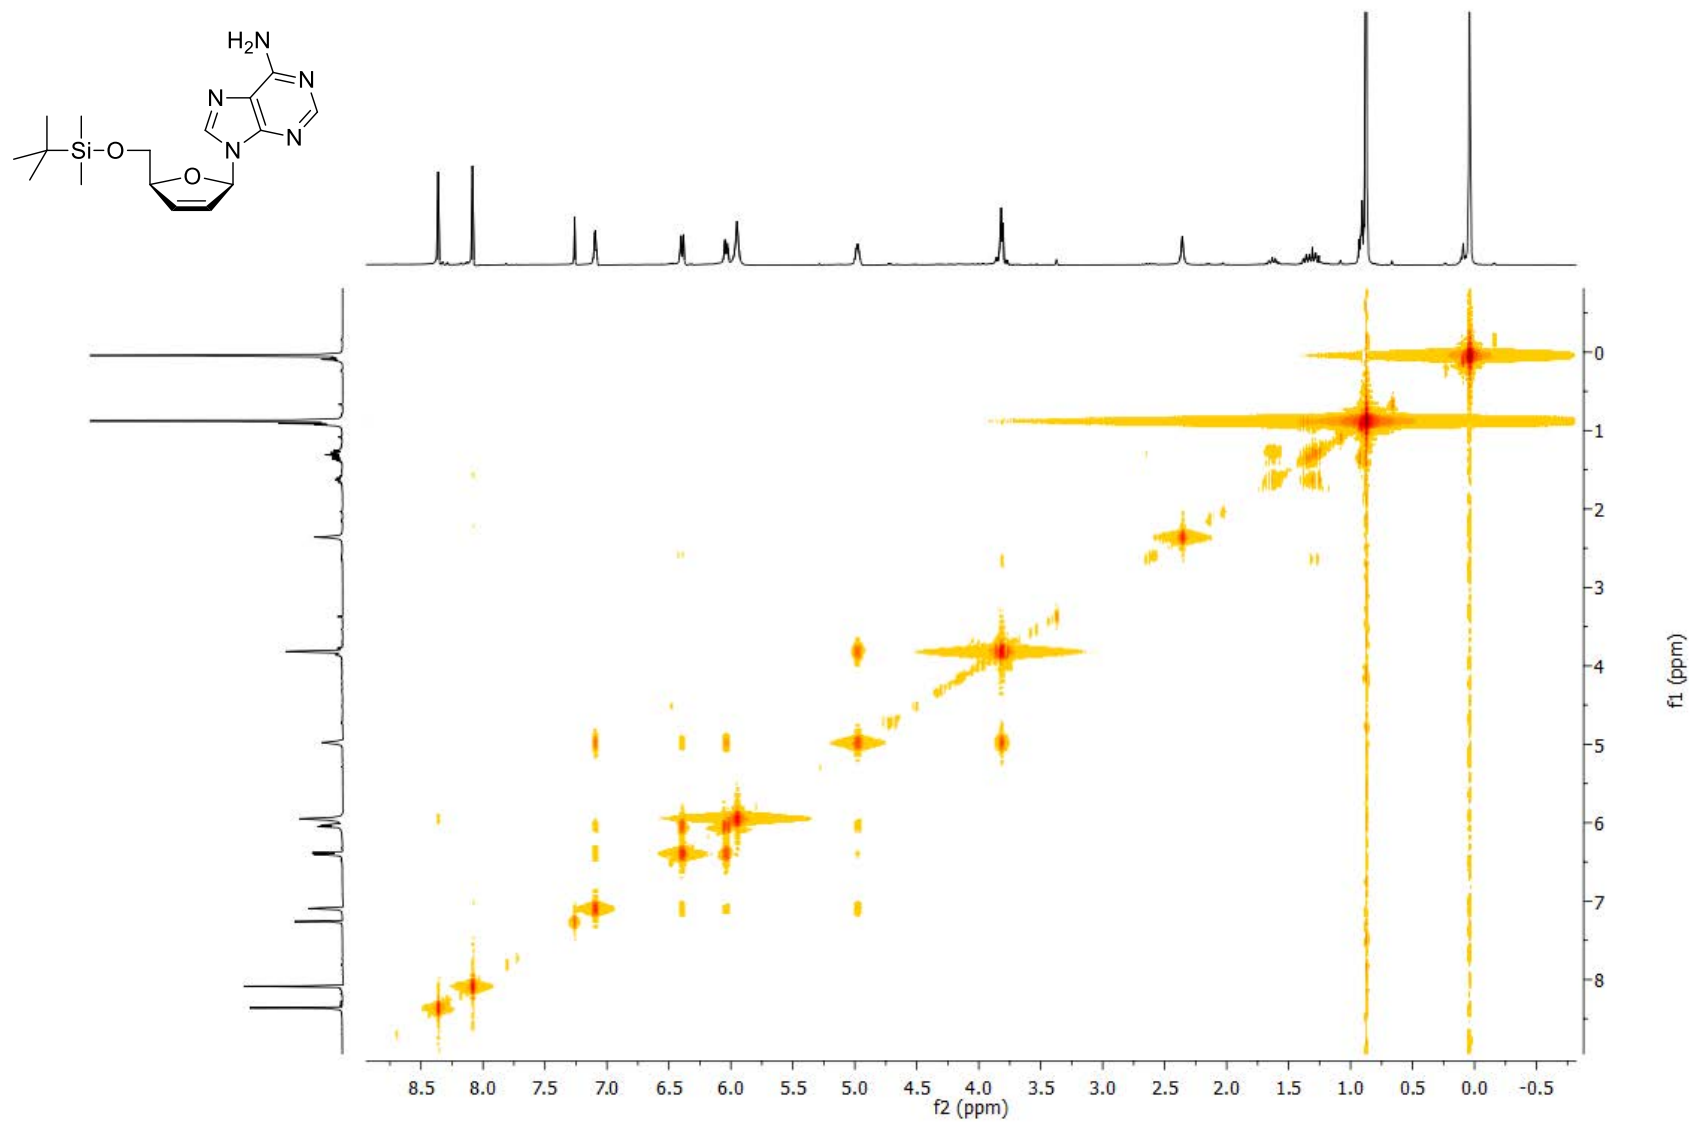

5'-O-(*tert*-Butyldimethylsilyl)-2',3'-dideohydro-2',3'-dideoxy- $\beta$ -D-adenosine (7e)

HSQC NMR ( $\text{CDCl}_3$ )

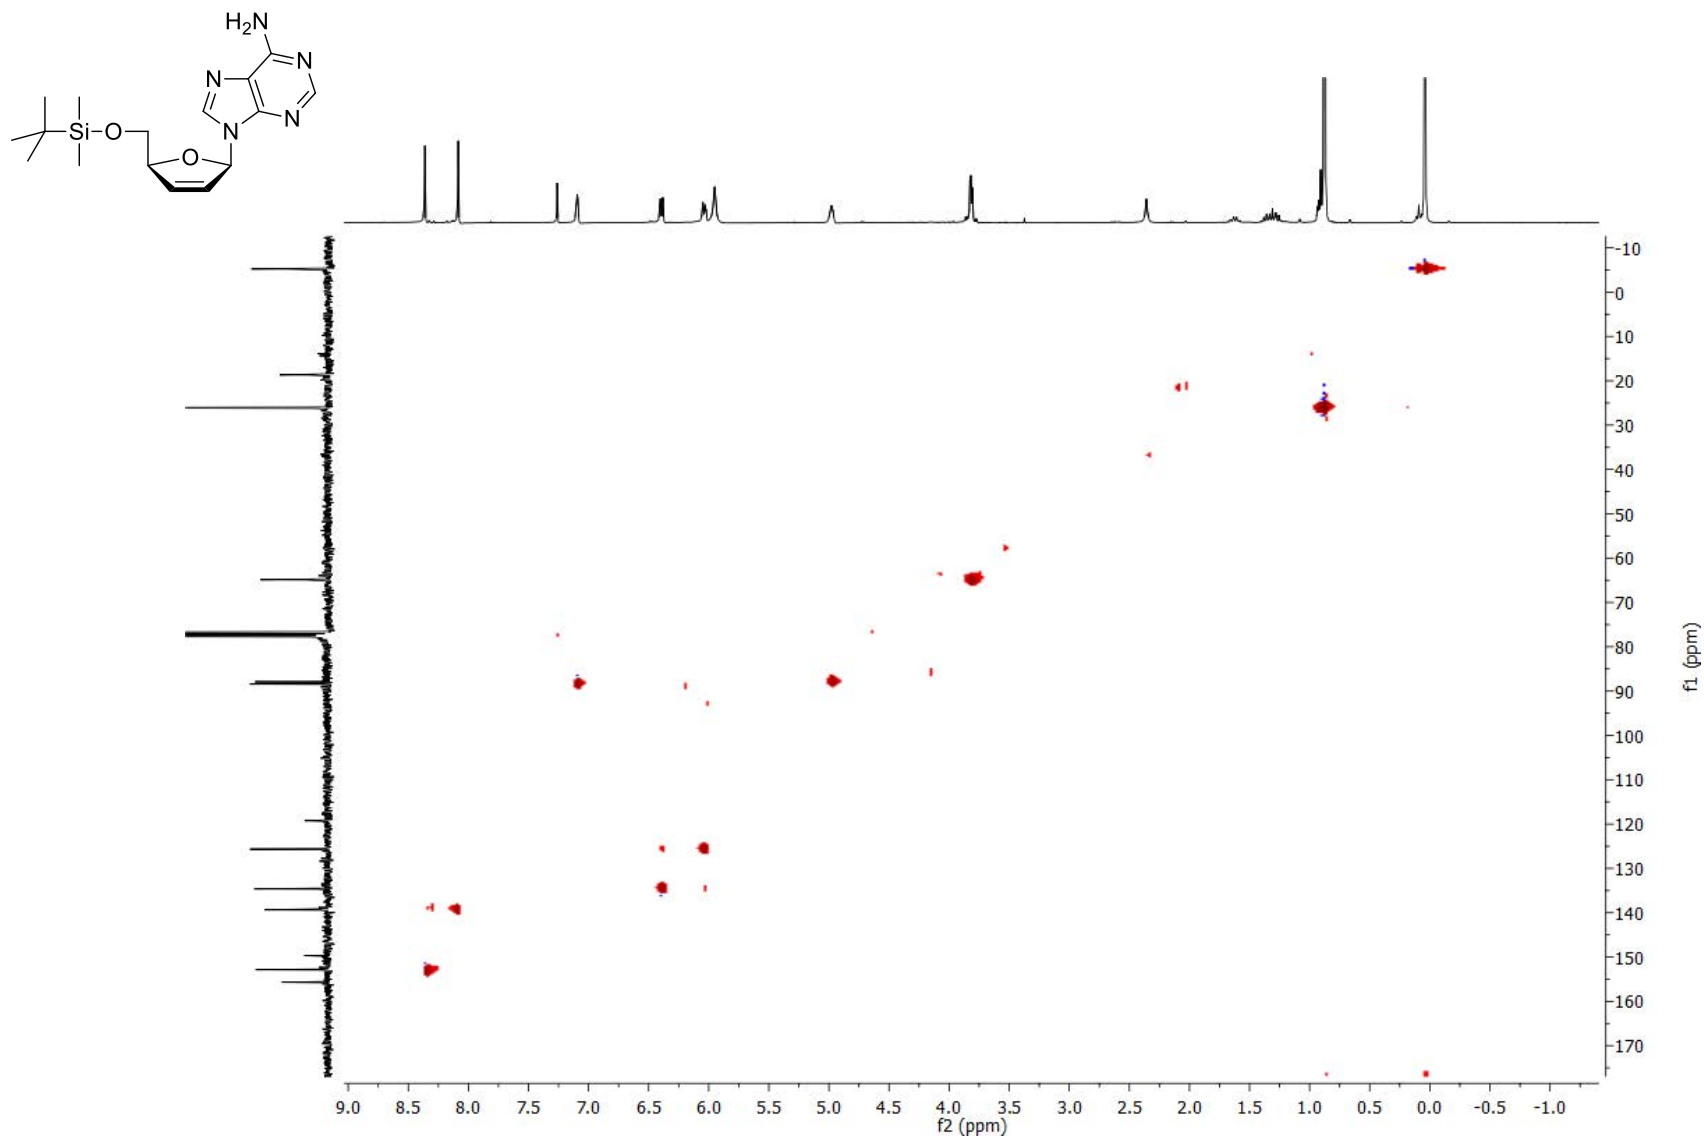

5'-*O*-(*tert*-Butyldimethylsilyl)-2',3'-didehydro-2',3'-dideoxy- $\beta$ -D-inosine (7f)

$^1\text{H}$ -NMR (300.13 MHz,  $\text{CDCl}_3$ )

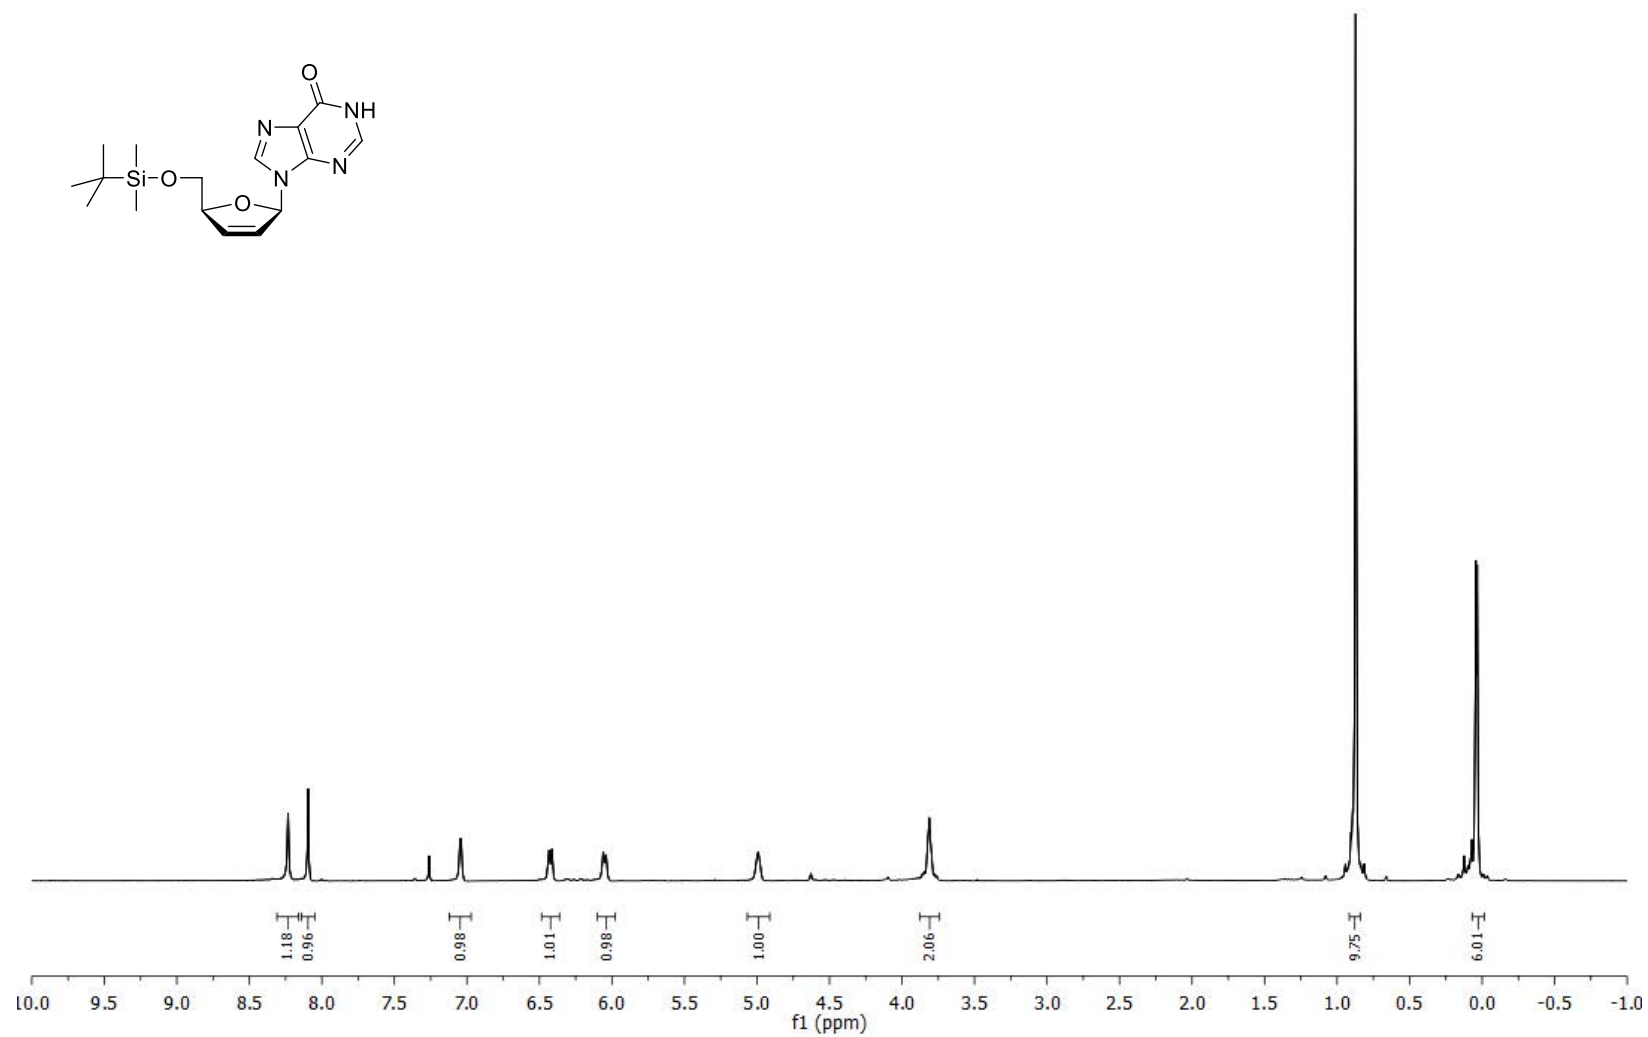



5'-O-(*tert*-Butyldimethylsilyl)-2',3'-didehydro-2',3'-dideoxy- $\beta$ -D-inosine (7f)

$^{13}\text{C}$ -NMR (75.5 MHz,  $\text{CDCl}_3$ )

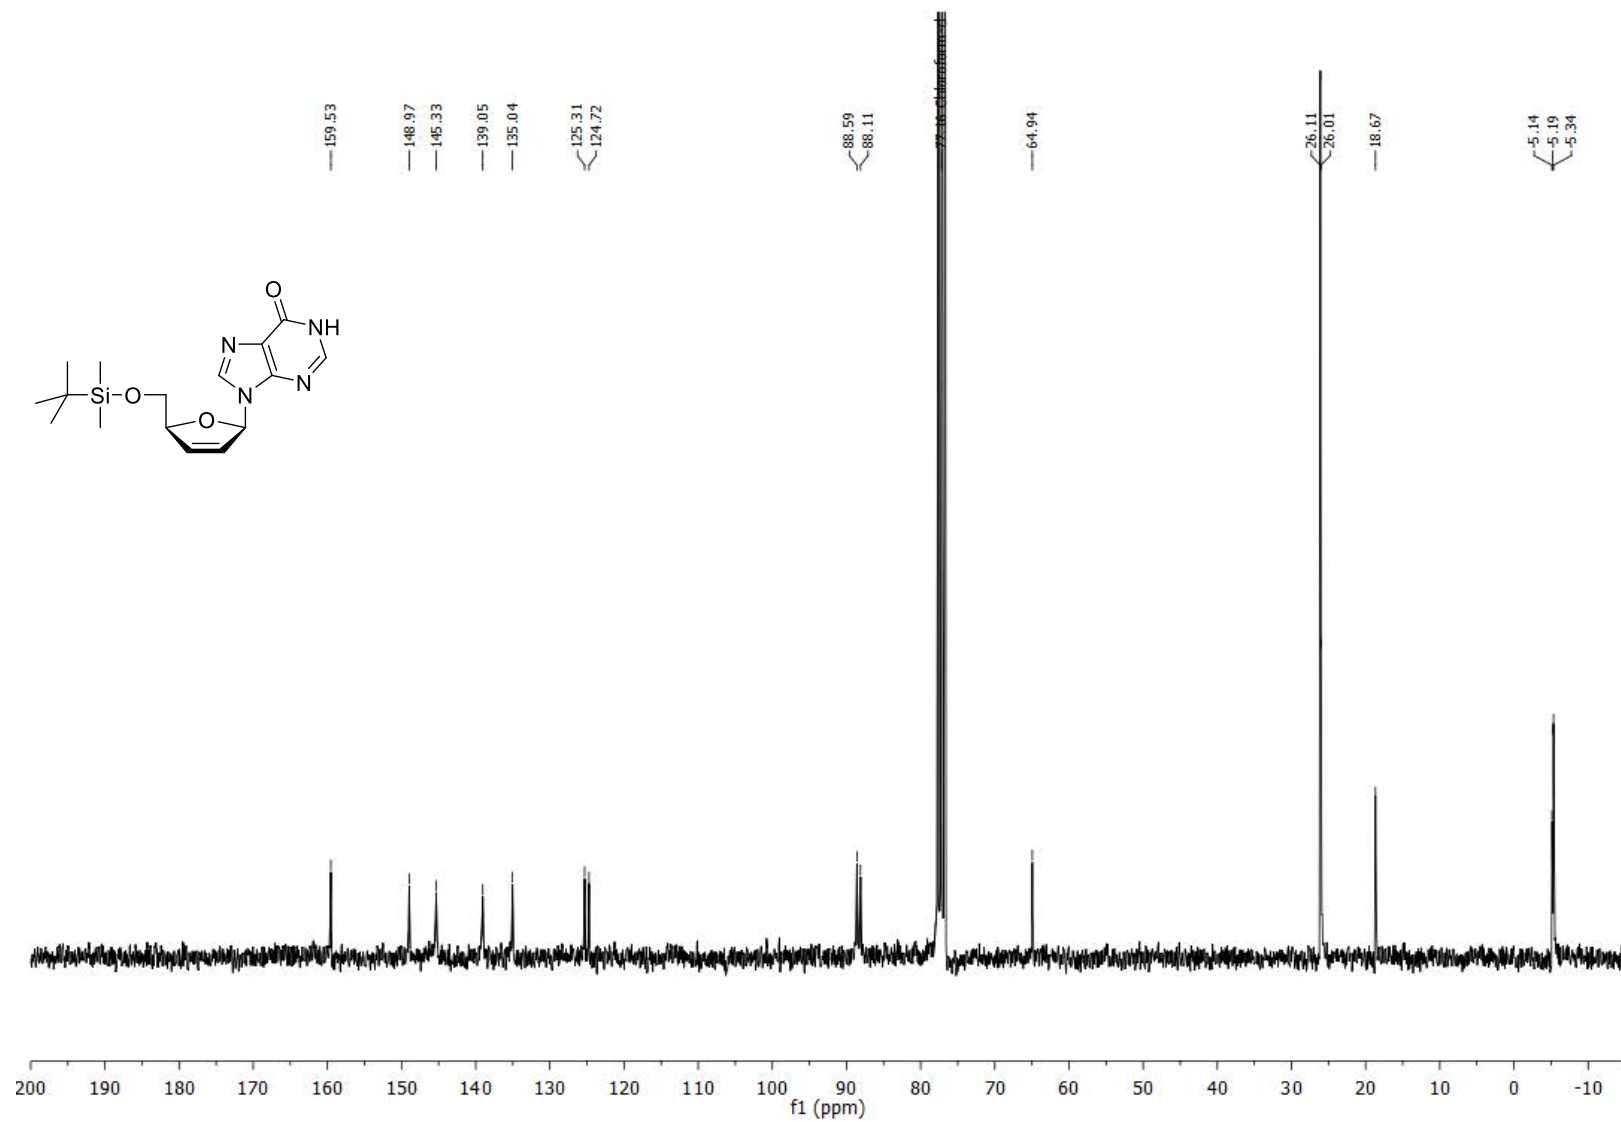

5'-*O*-(*tert*-Butyldimethylsilyl)-2',3'-didehydro-2',3'-dideoxy- $\beta$ -D-inosine (7f)

COSY NMR (CDCl<sub>3</sub>)

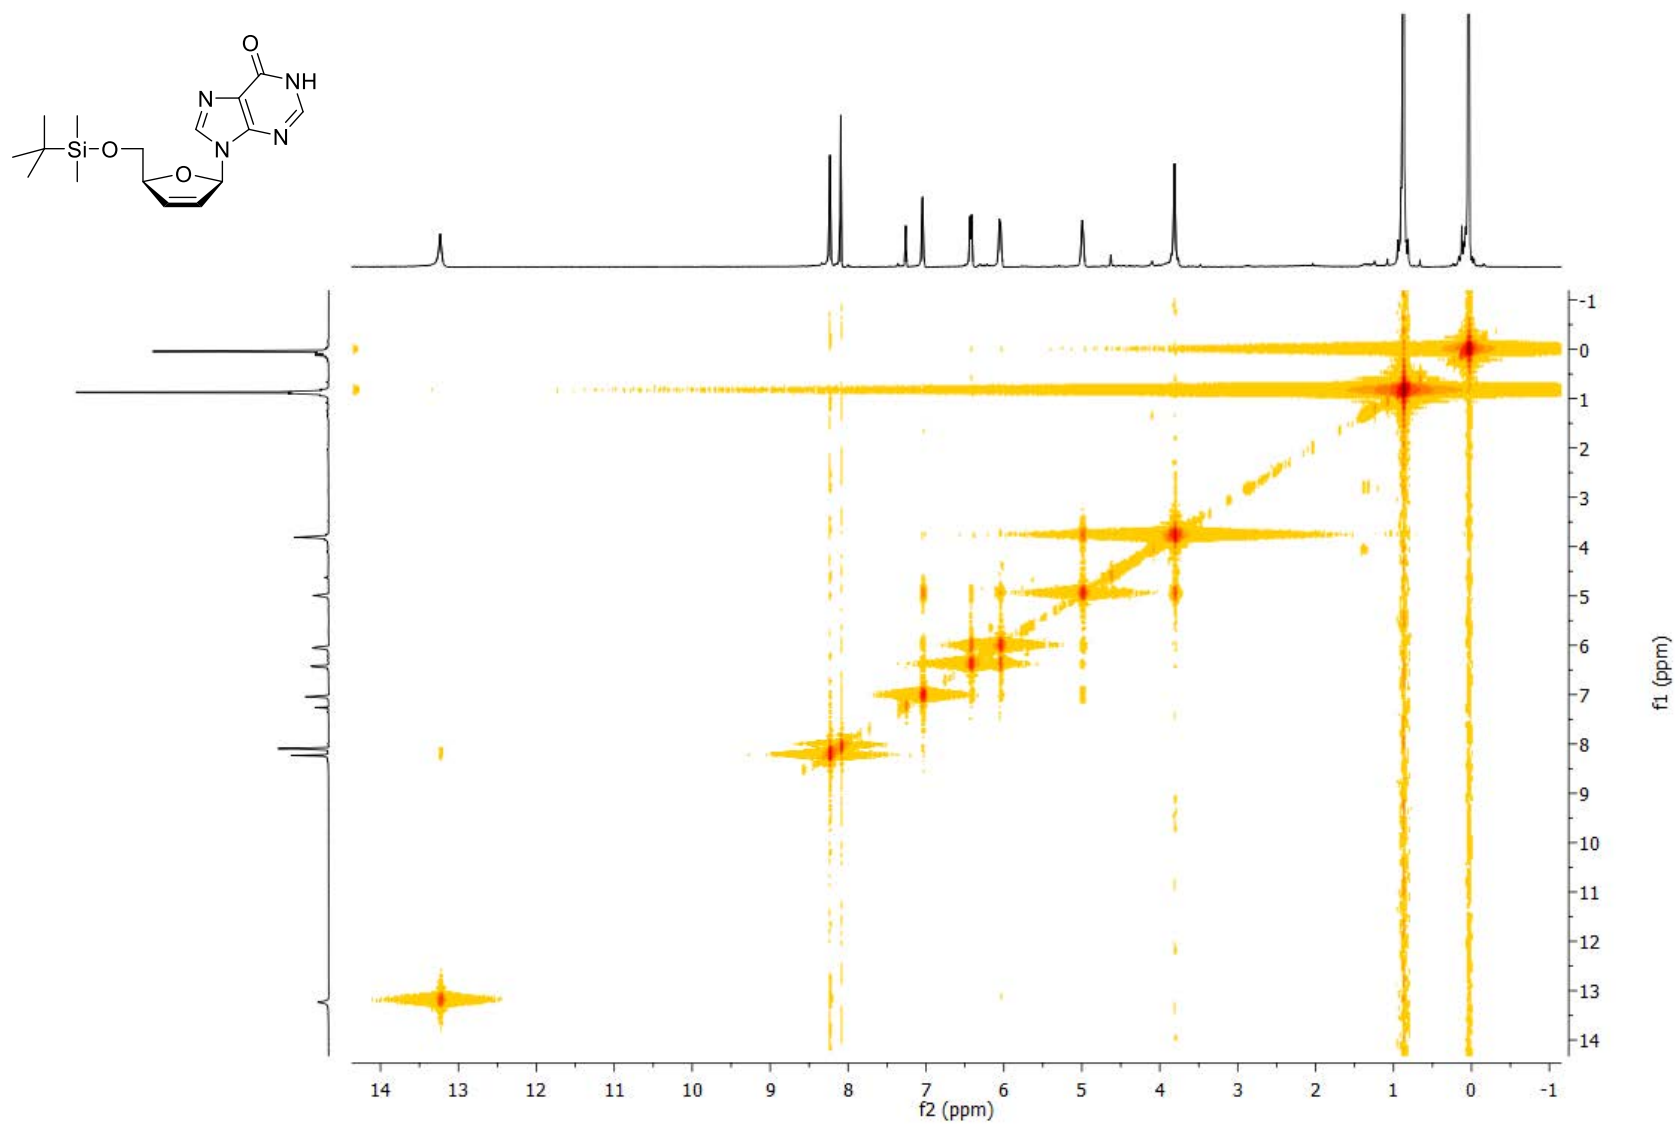

5'-O-(*tert*-Butyldimethylsilyl)-2',3'-didehydro-2',3'-dideoxy- $\beta$ -D-inosine (7f)

HSQC NMR (CDCl<sub>3</sub>)

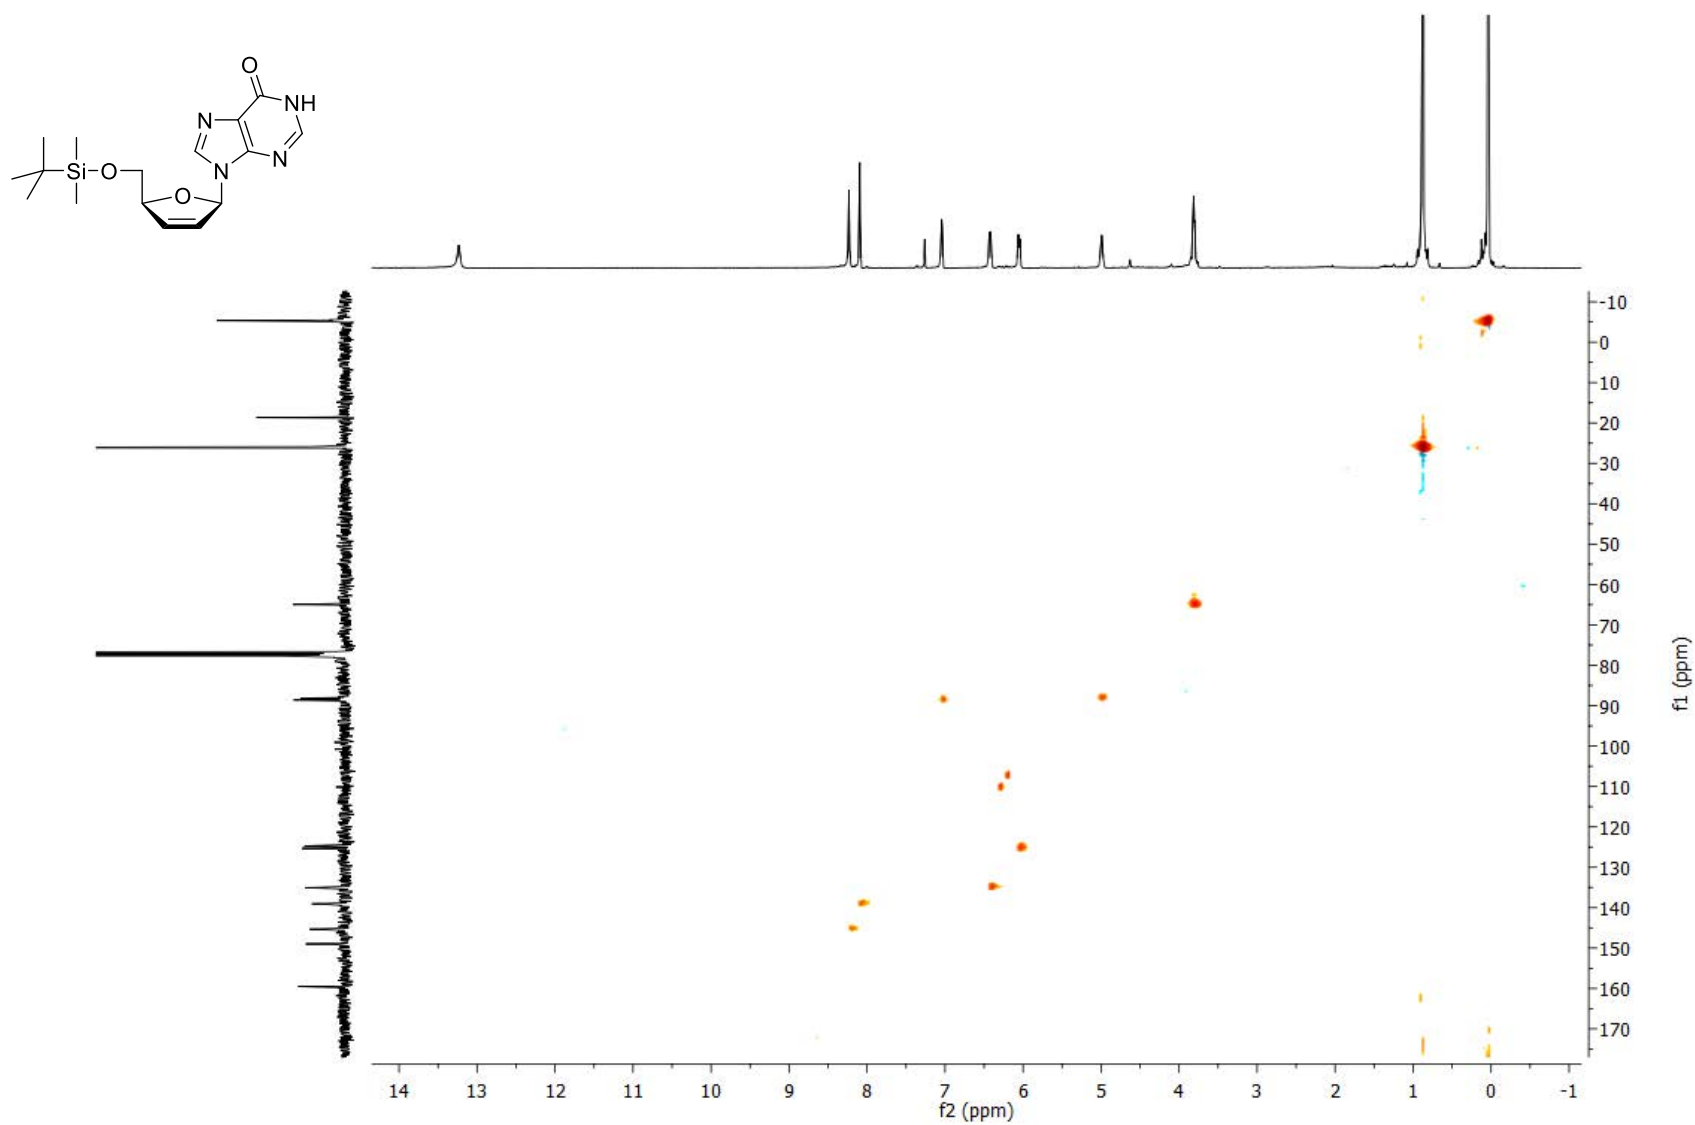

## 2',3'-Didehydro-2',3'-dideoxy- $\beta$ -D-uridine (8a)

$^1\text{H-NMR}$  (300.13 MHz,  $\text{MeOH-}d_4$ )

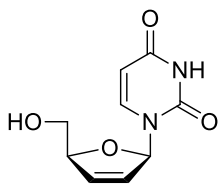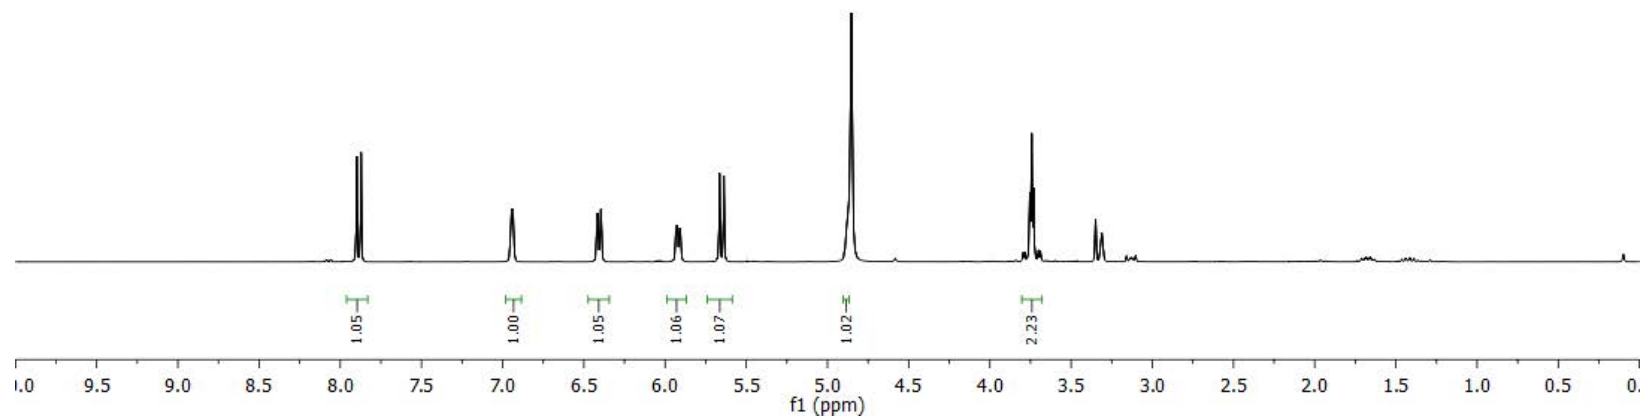

S116

## 2',3'-Didehydro-2',3'-dideoxy- $\beta$ -D-uridine (8a)

$^{13}\text{C}$ -NMR (75.5 MHz,  $\text{MeOH-}d_4$ )

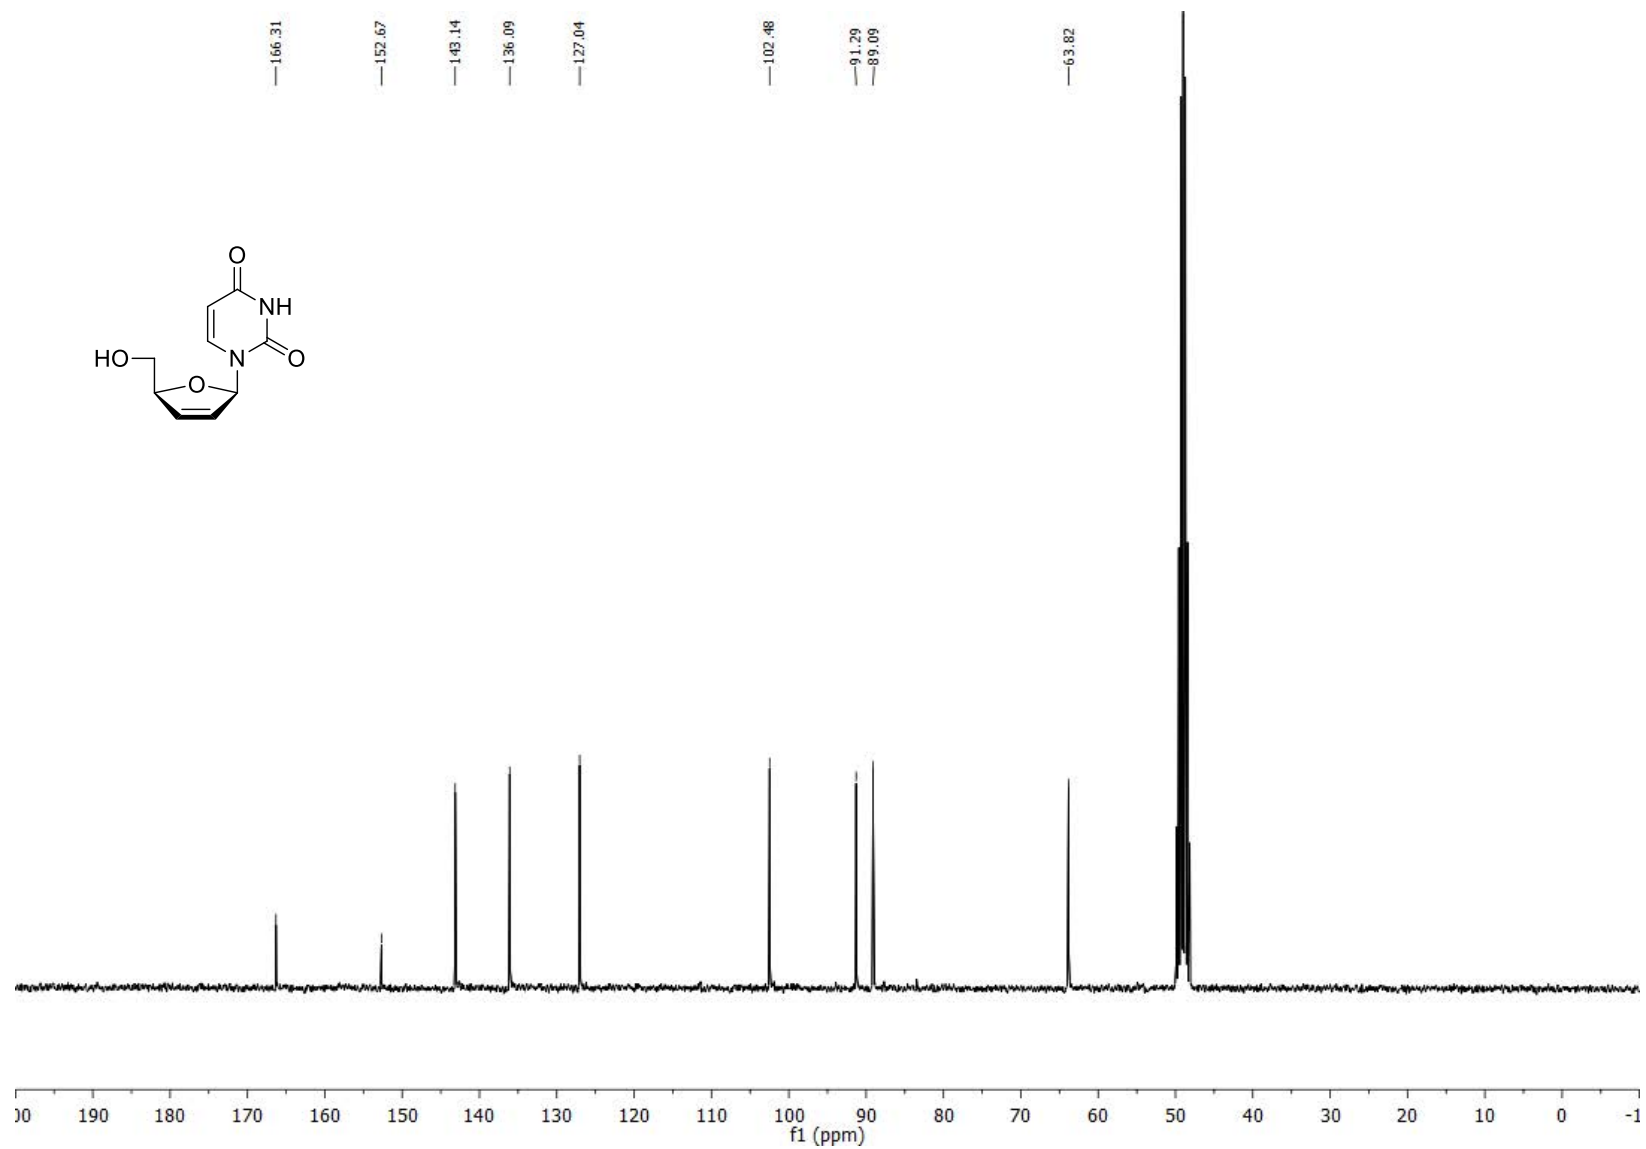

## 2',3'-Didehydro-2',3'-dideoxy- $\beta$ -D-uridine (8a)

DEPT NMR (75.5 MHz, MeOH- $d_4$ )

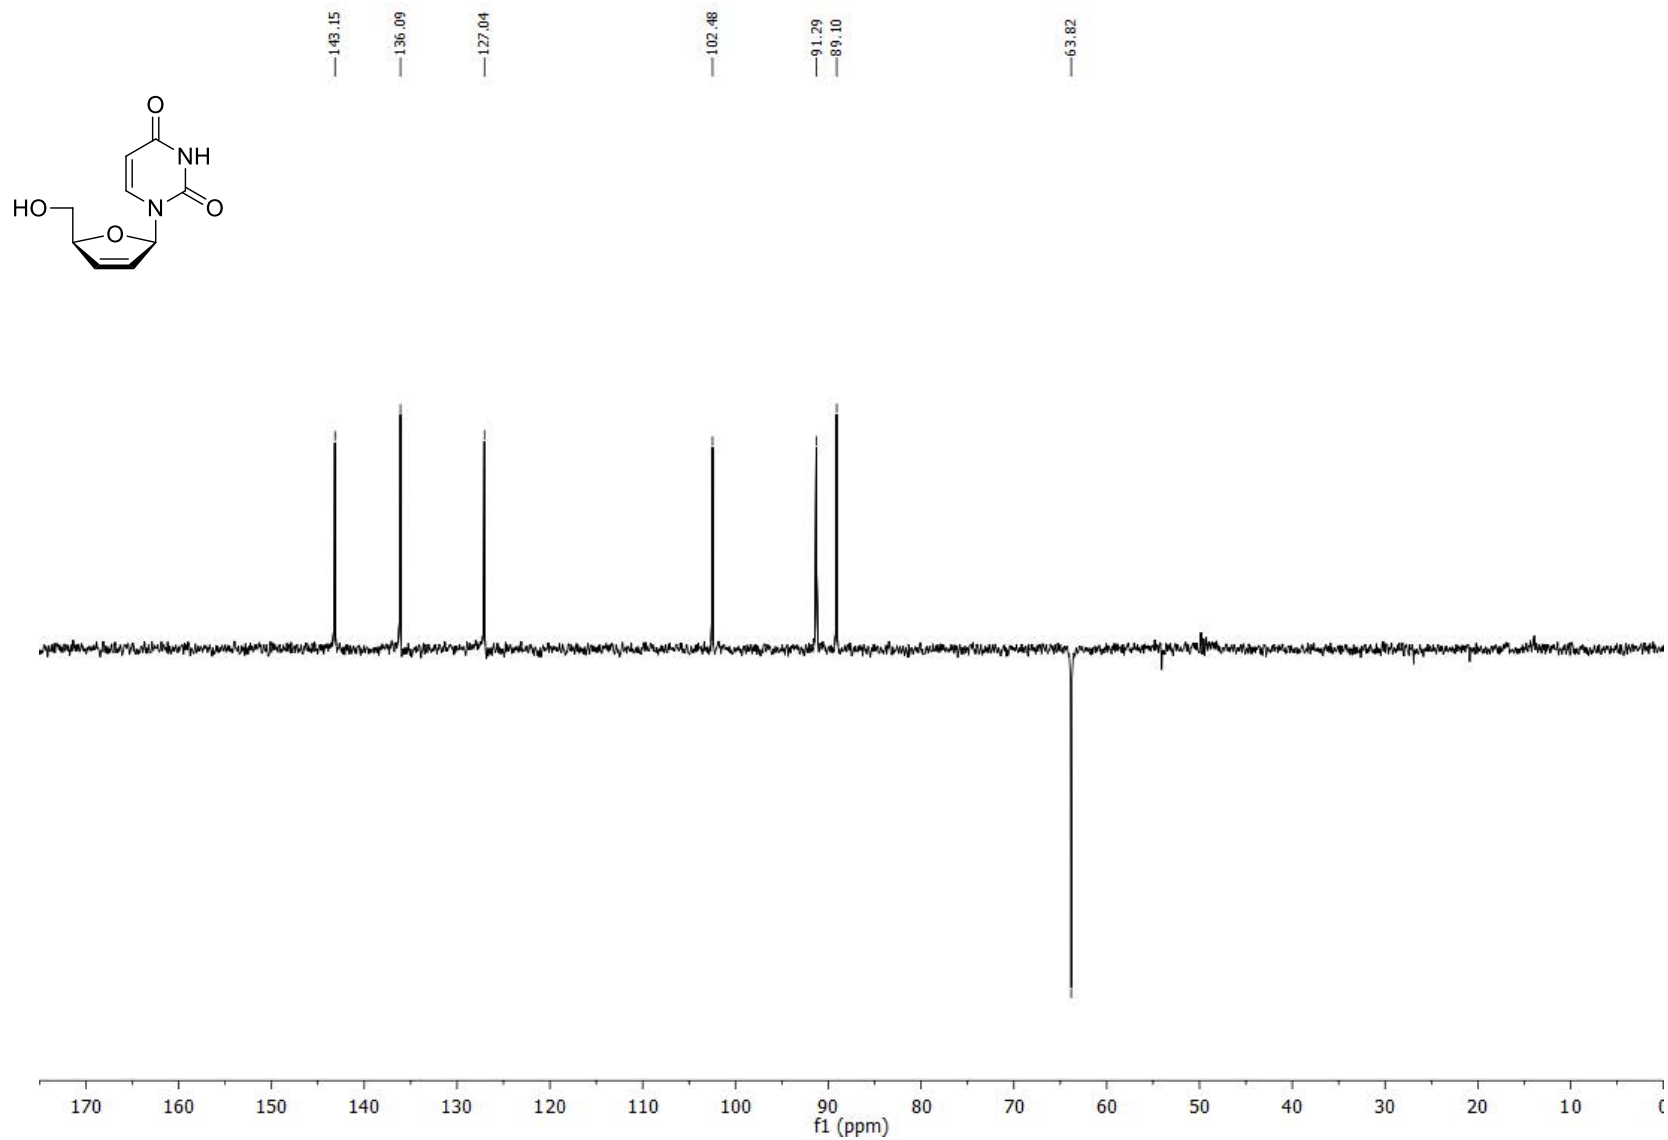

## 2',3'-Didehydro-2',3'-dideoxy- $\beta$ -D-uridine (8a)

COSY NMR (MeOH- $d_4$ )

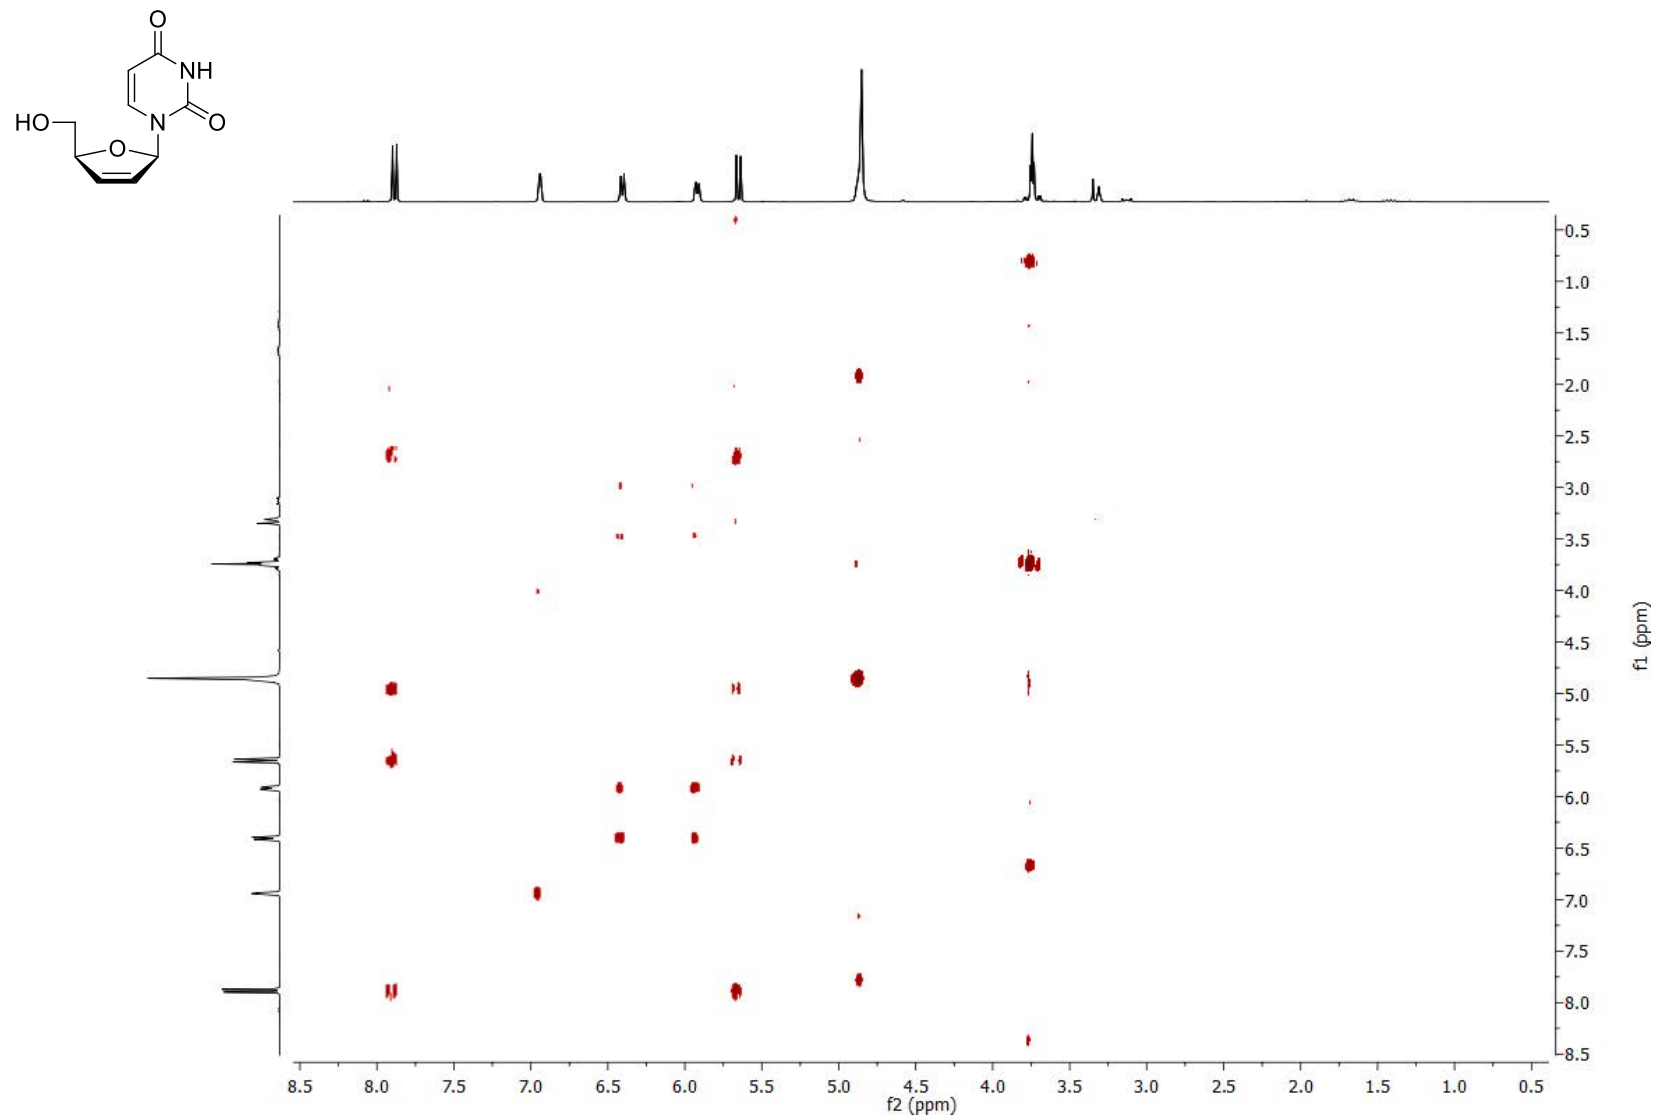

## 2',3'-Didehydro-2',3'-dideoxy- $\beta$ -D-uridine (8a)

HSQC NMR (MeOH- $d_4$ )

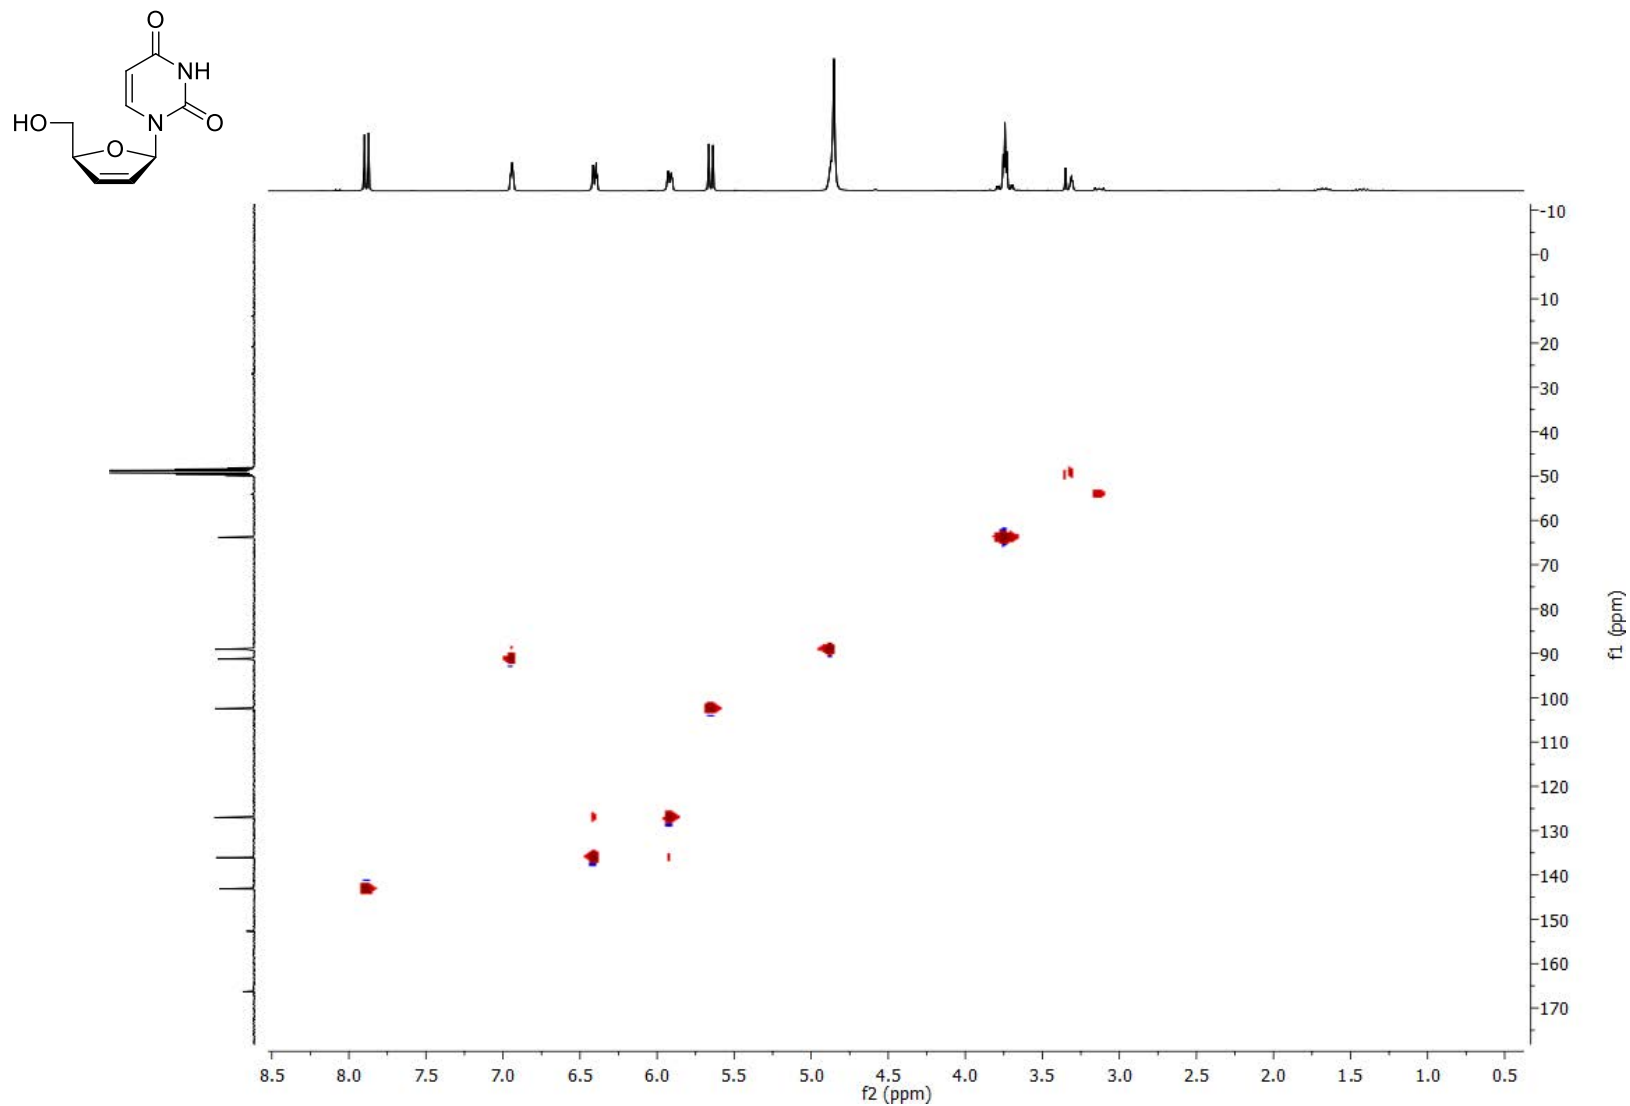



2',3'-Didehydro-3'-deoxy- $\beta$ -D-5-thymidine (8b)

$^1\text{H}$ -NMR (300.13 MHz,  $\text{MeOH-}d_4$ )

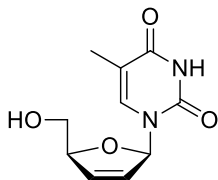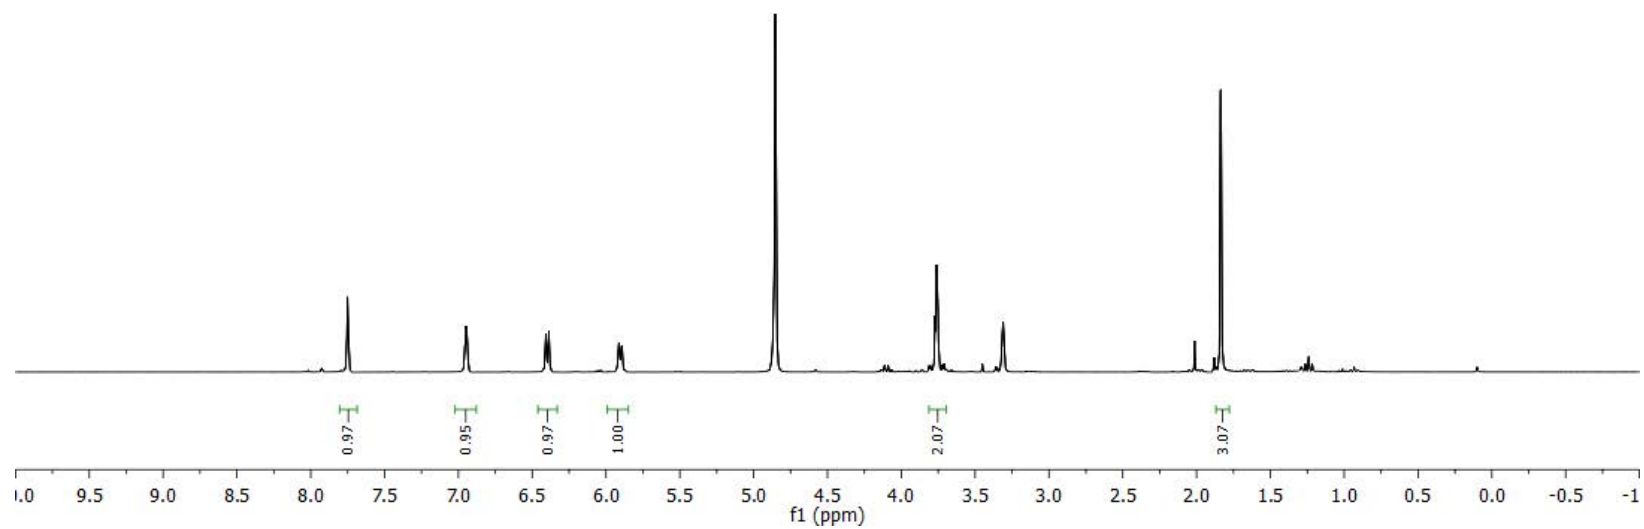

S121

## 2',3'-Didehydro-3'-deoxy- $\beta$ -D-5-thymidine (8b)

$^{13}\text{C}$ -NMR (75.5 MHz,  $\text{MeOH-}d_4$ )

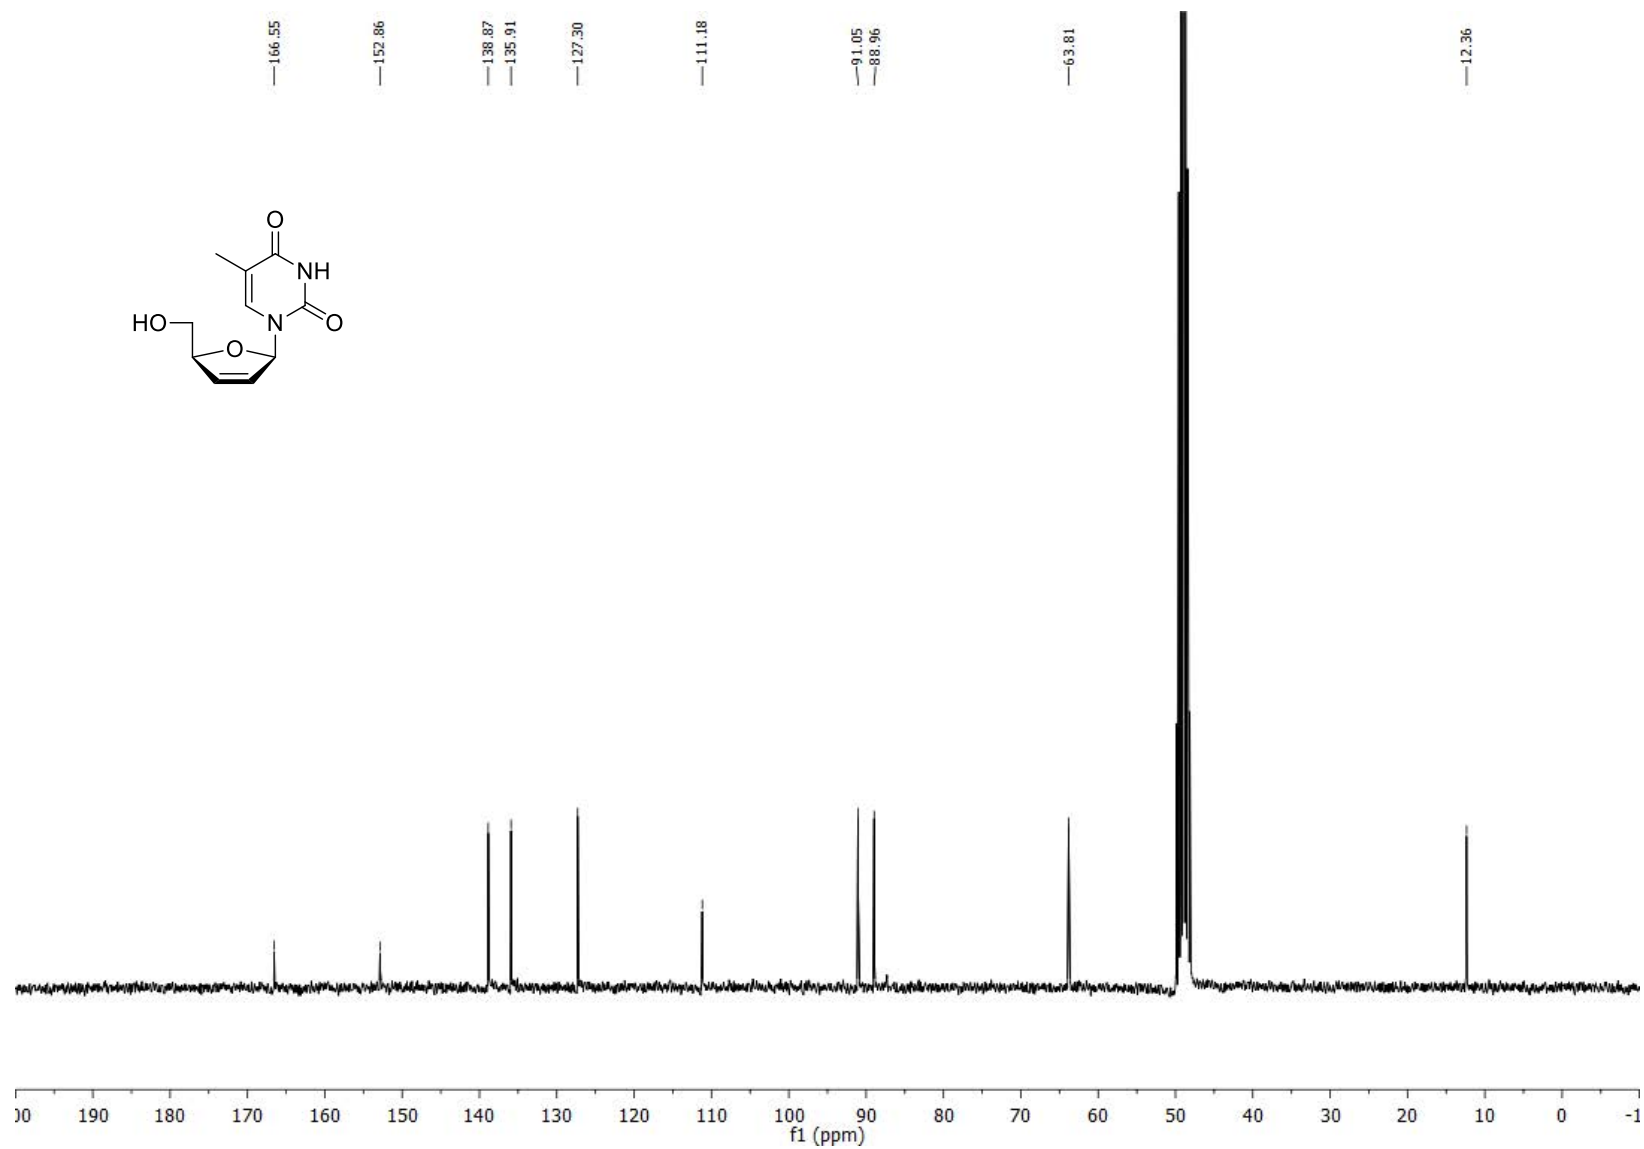

***N*<sup>4</sup>-Benzoyl-2',3'-didehydro-2',3'-dideoxy- $\beta$ -D-cytidine (8d)**

<sup>1</sup>H-NMR (300.13 MHz, MeOH-*d*<sub>4</sub>)

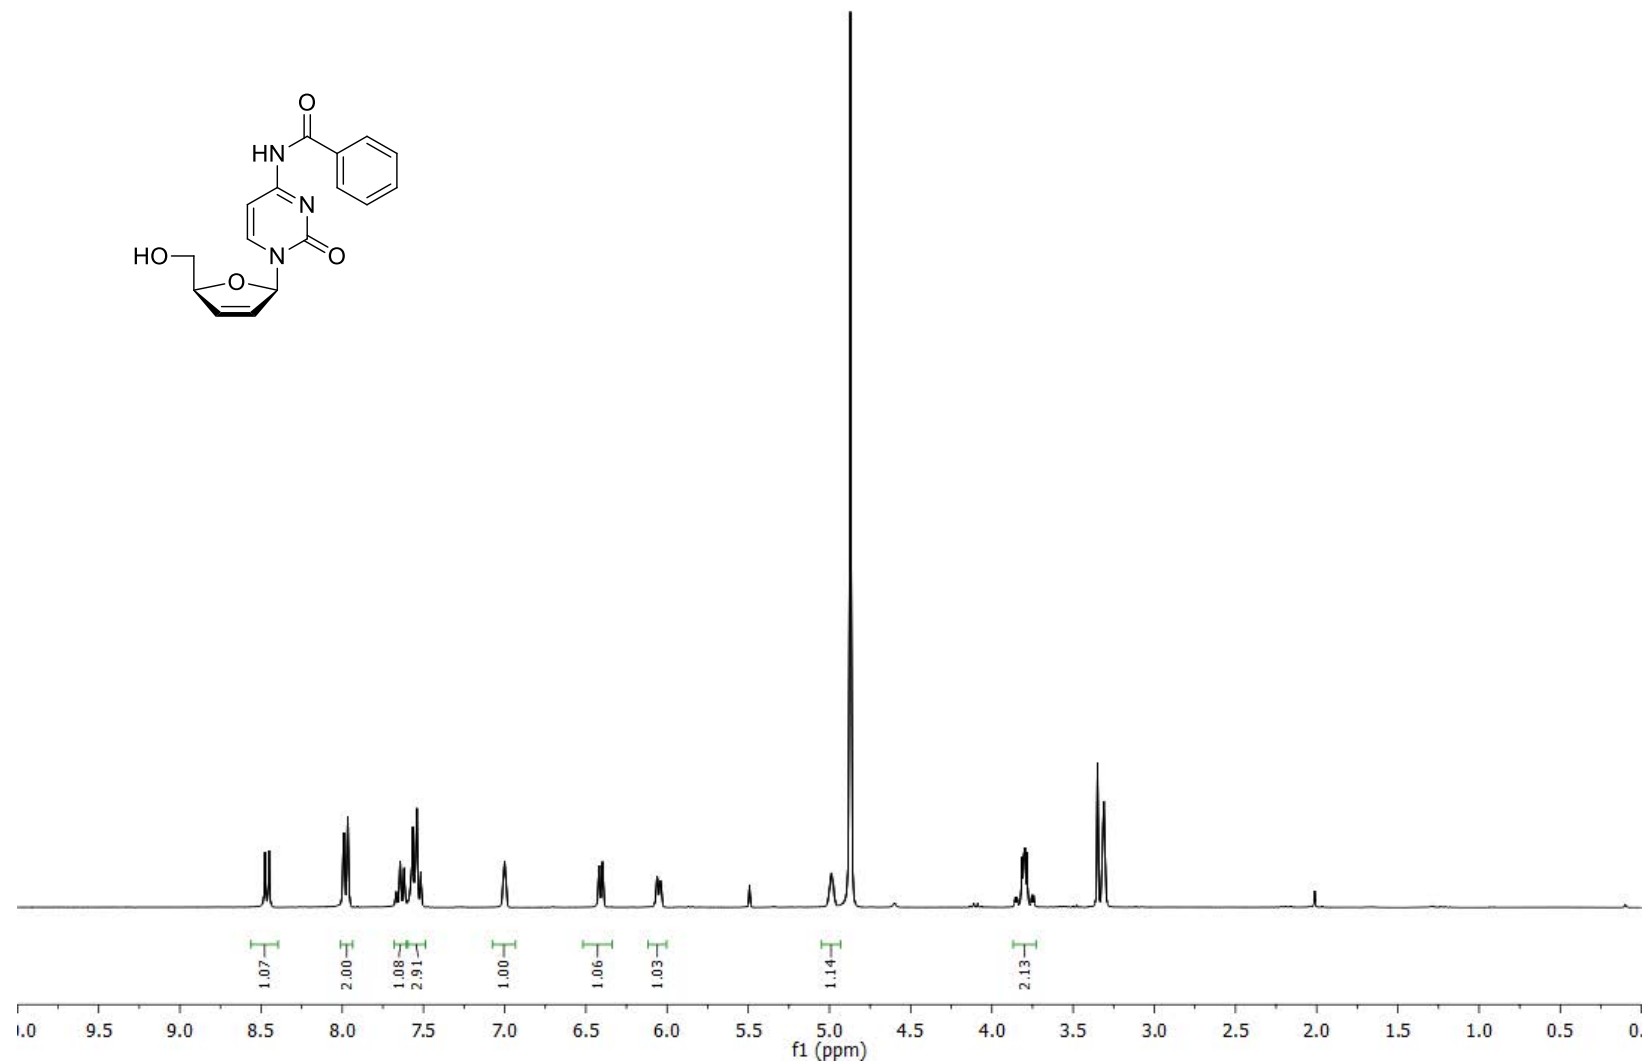

***N*<sup>4</sup>-Benzoyl-2',3'-didehydro-2',3'-dideoxy-β-D-cytidine (8d)**

<sup>13</sup>C-NMR (75.5 MHz, MeOH-*d*<sub>4</sub>)

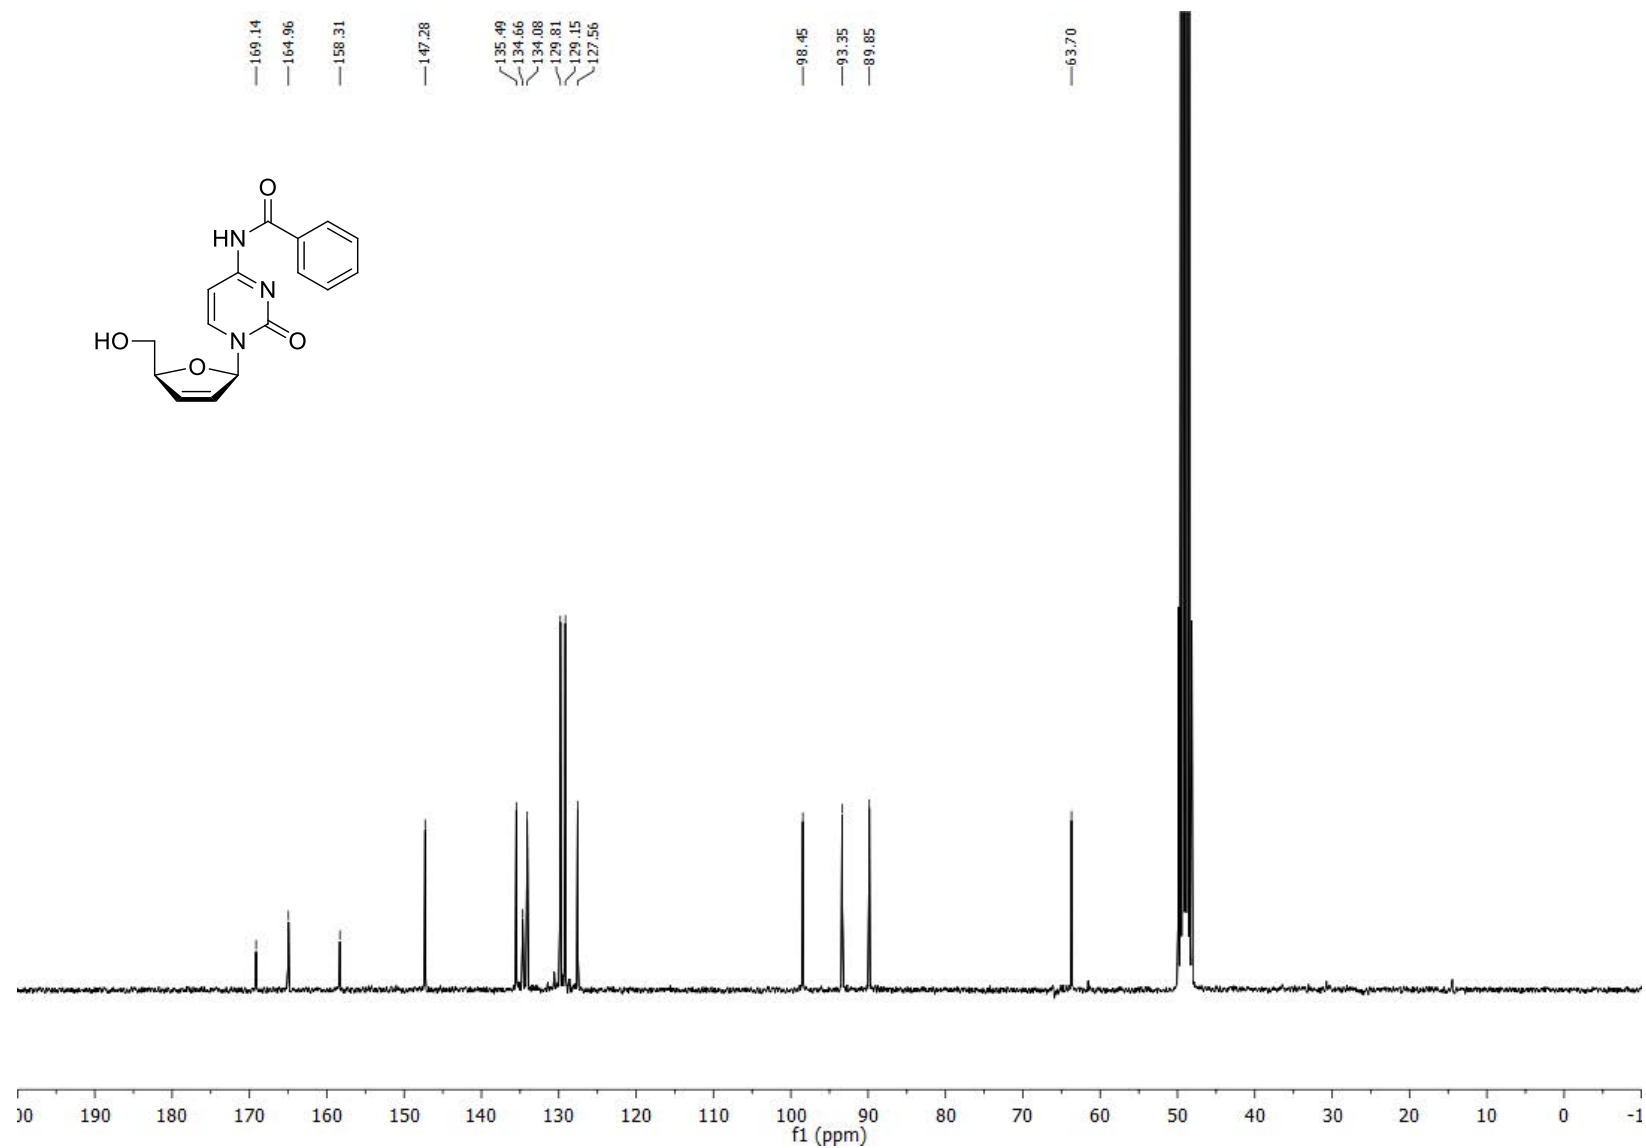

***N*<sup>4</sup>-Benzoyl-2',3'-didehydro-2',3'-dideoxy-β-D-cytidine (8d)**

DEPT NMR (75.5 MHz, MeOH-*d*<sub>4</sub>)

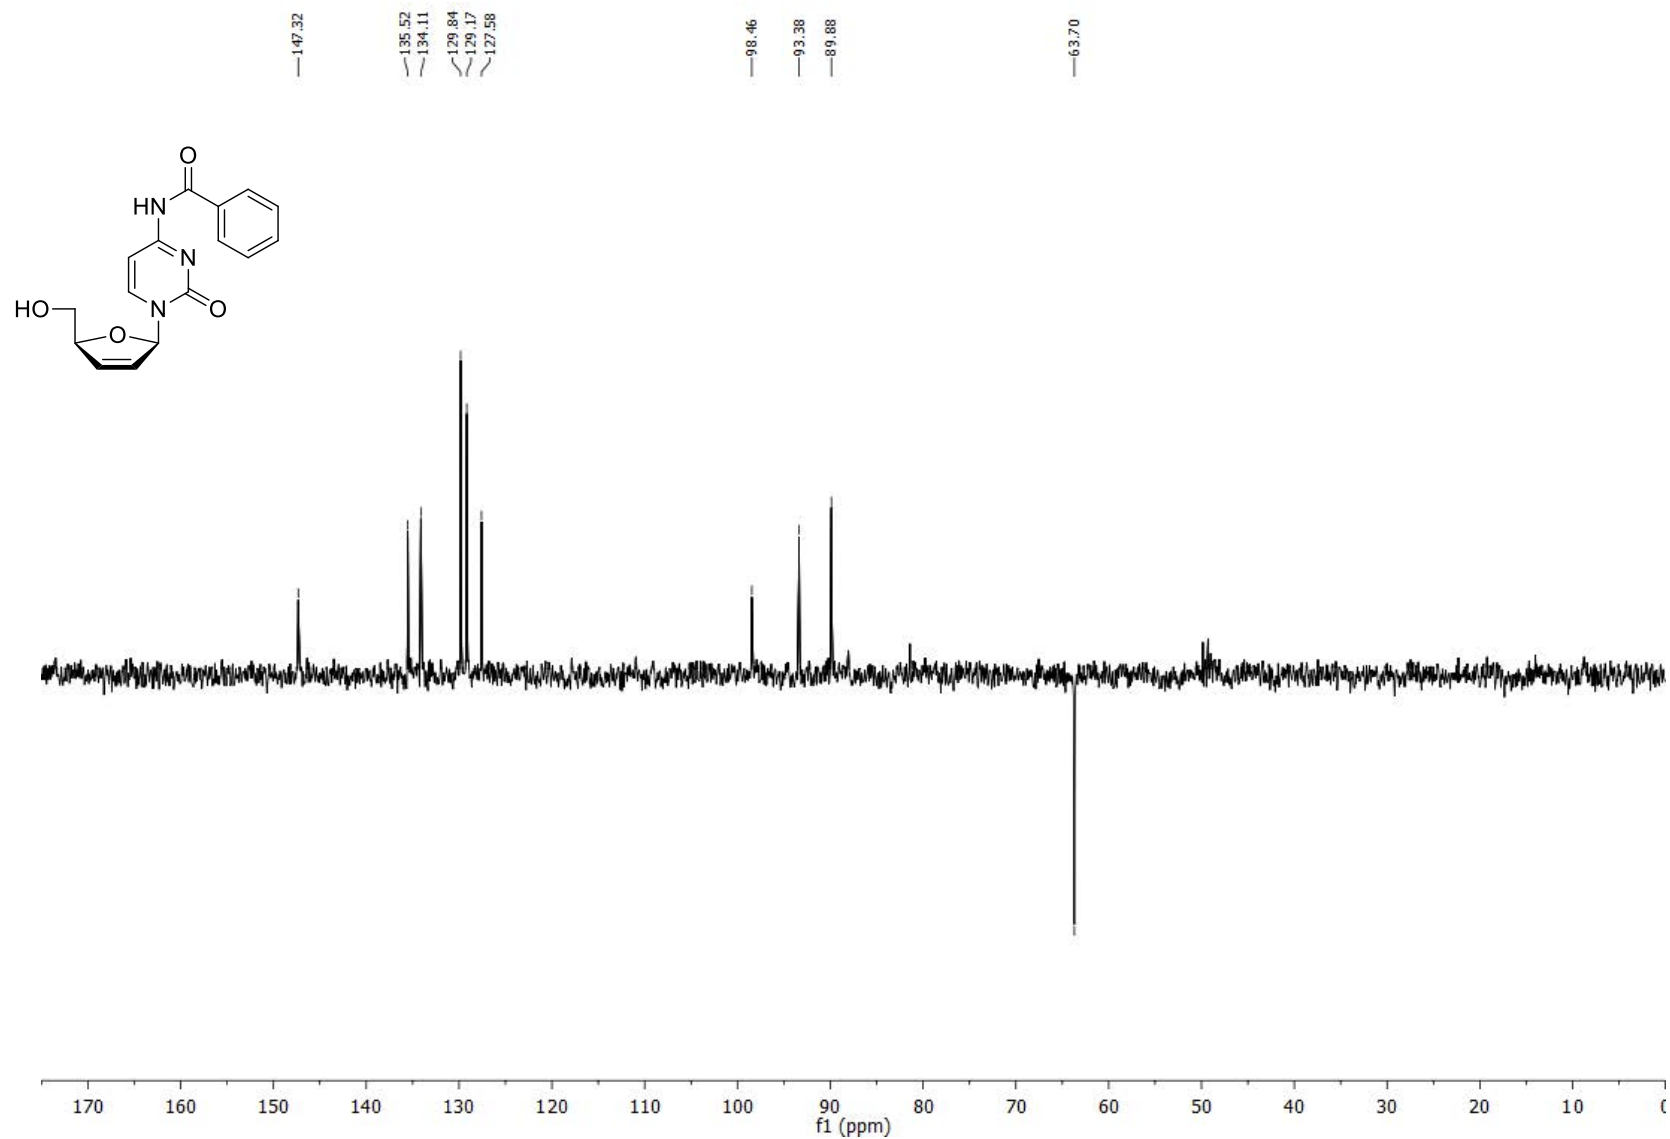

*N*<sup>4</sup>-Benzoyl-2',3'-didehydro-2',3'-dideoxy-β-D-cytidine (8d)

COSY NMR (MeOH-*d*<sub>4</sub>)

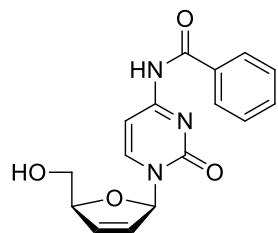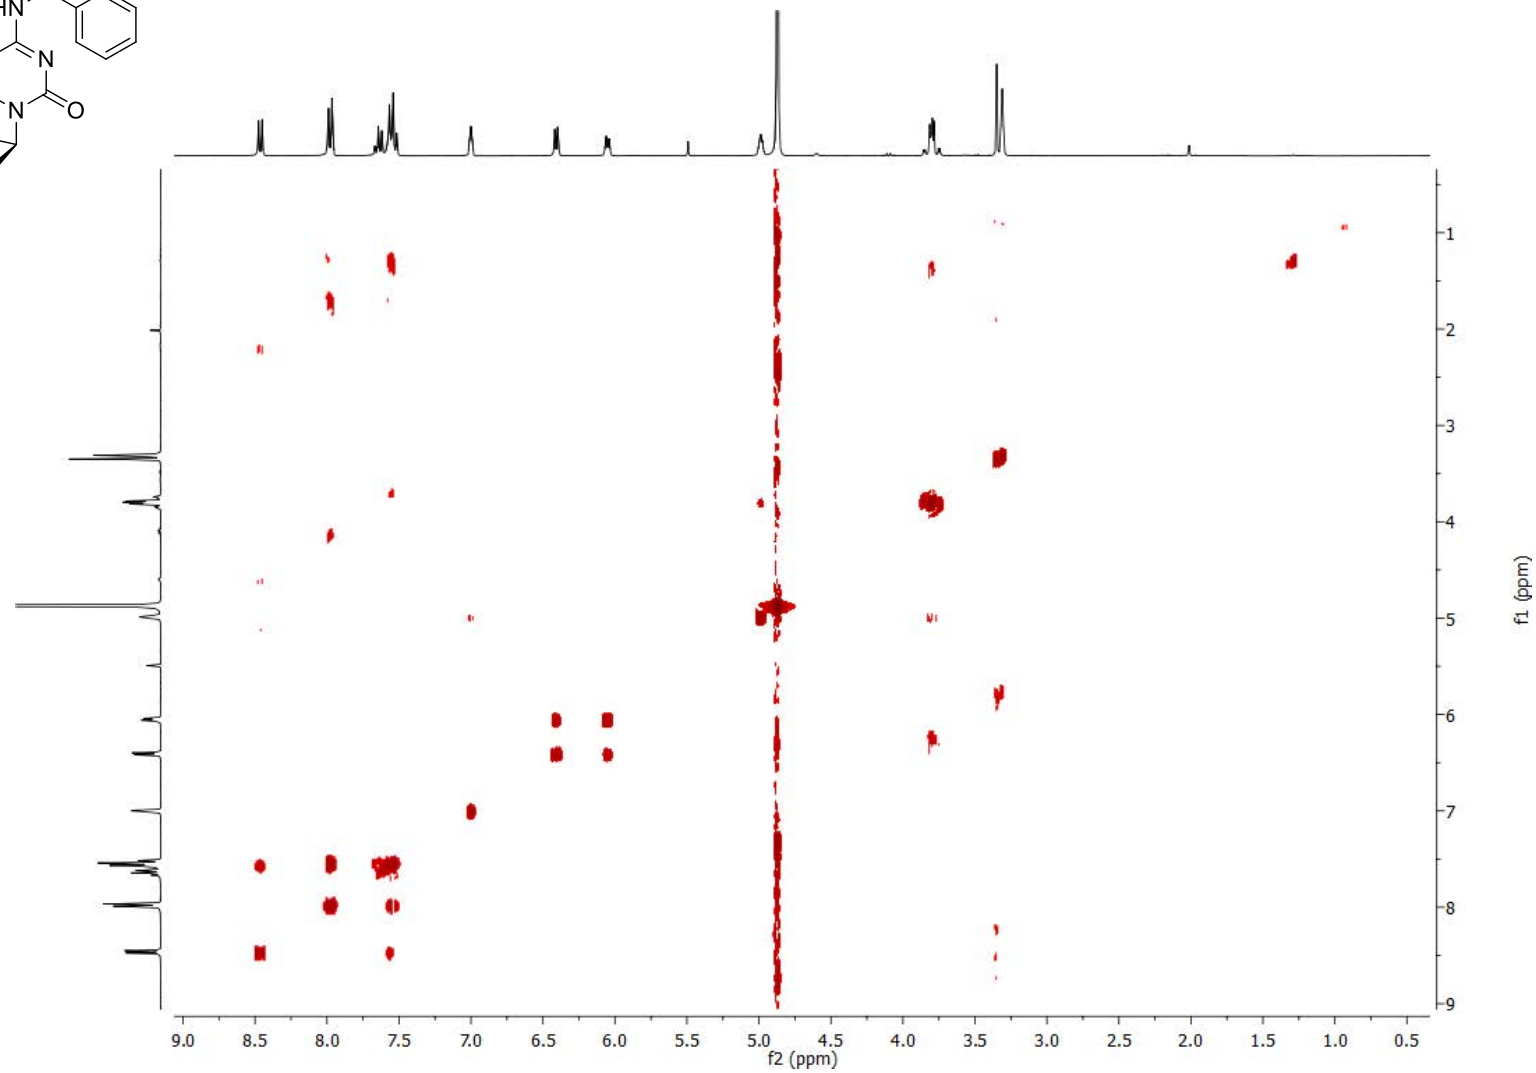

***N*<sup>4</sup>-Benzoyl-2',3'-didehydro-2',3'-dideoxy- $\beta$ -D-cytidine (8d)**

HSQC NMR (MeOH-*d*<sub>4</sub>)

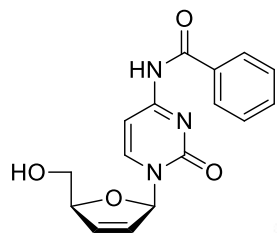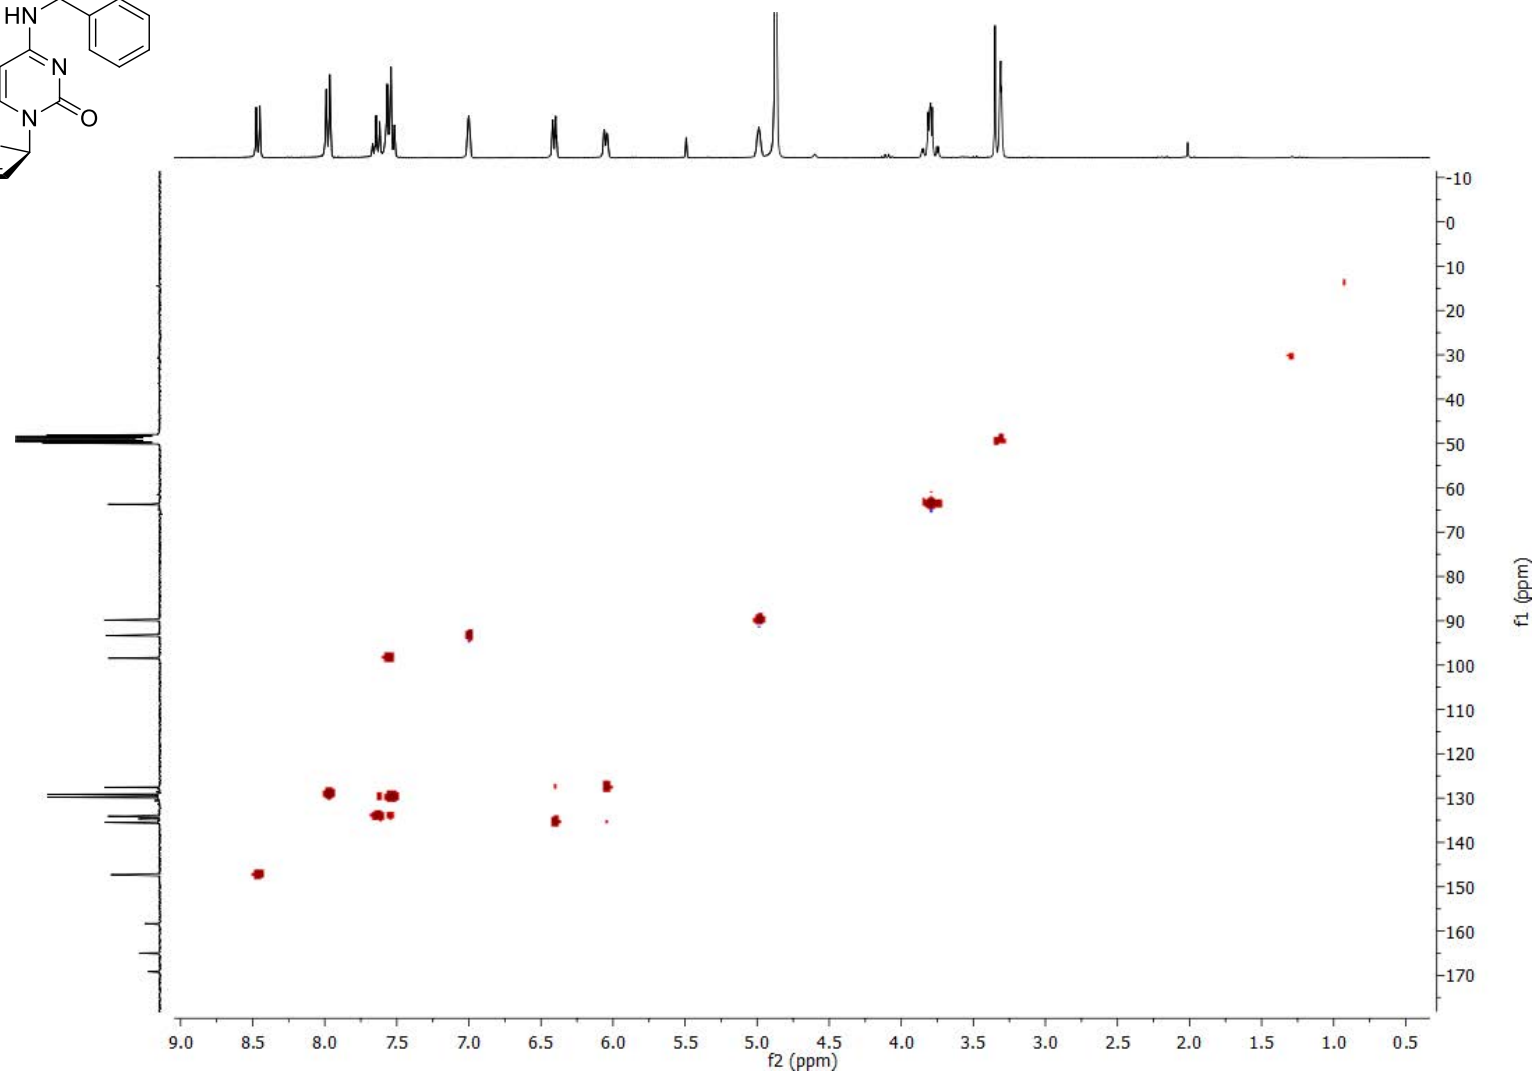

***N*<sup>4</sup>-Benzoyl-2',3'-didehydro-2',3'-dideoxy-β-D-cytidine (8d)**

HMBC NMR (MeOH-*d*<sub>4</sub>)

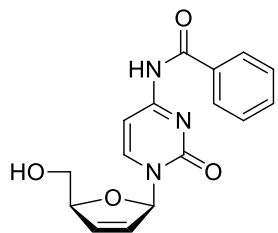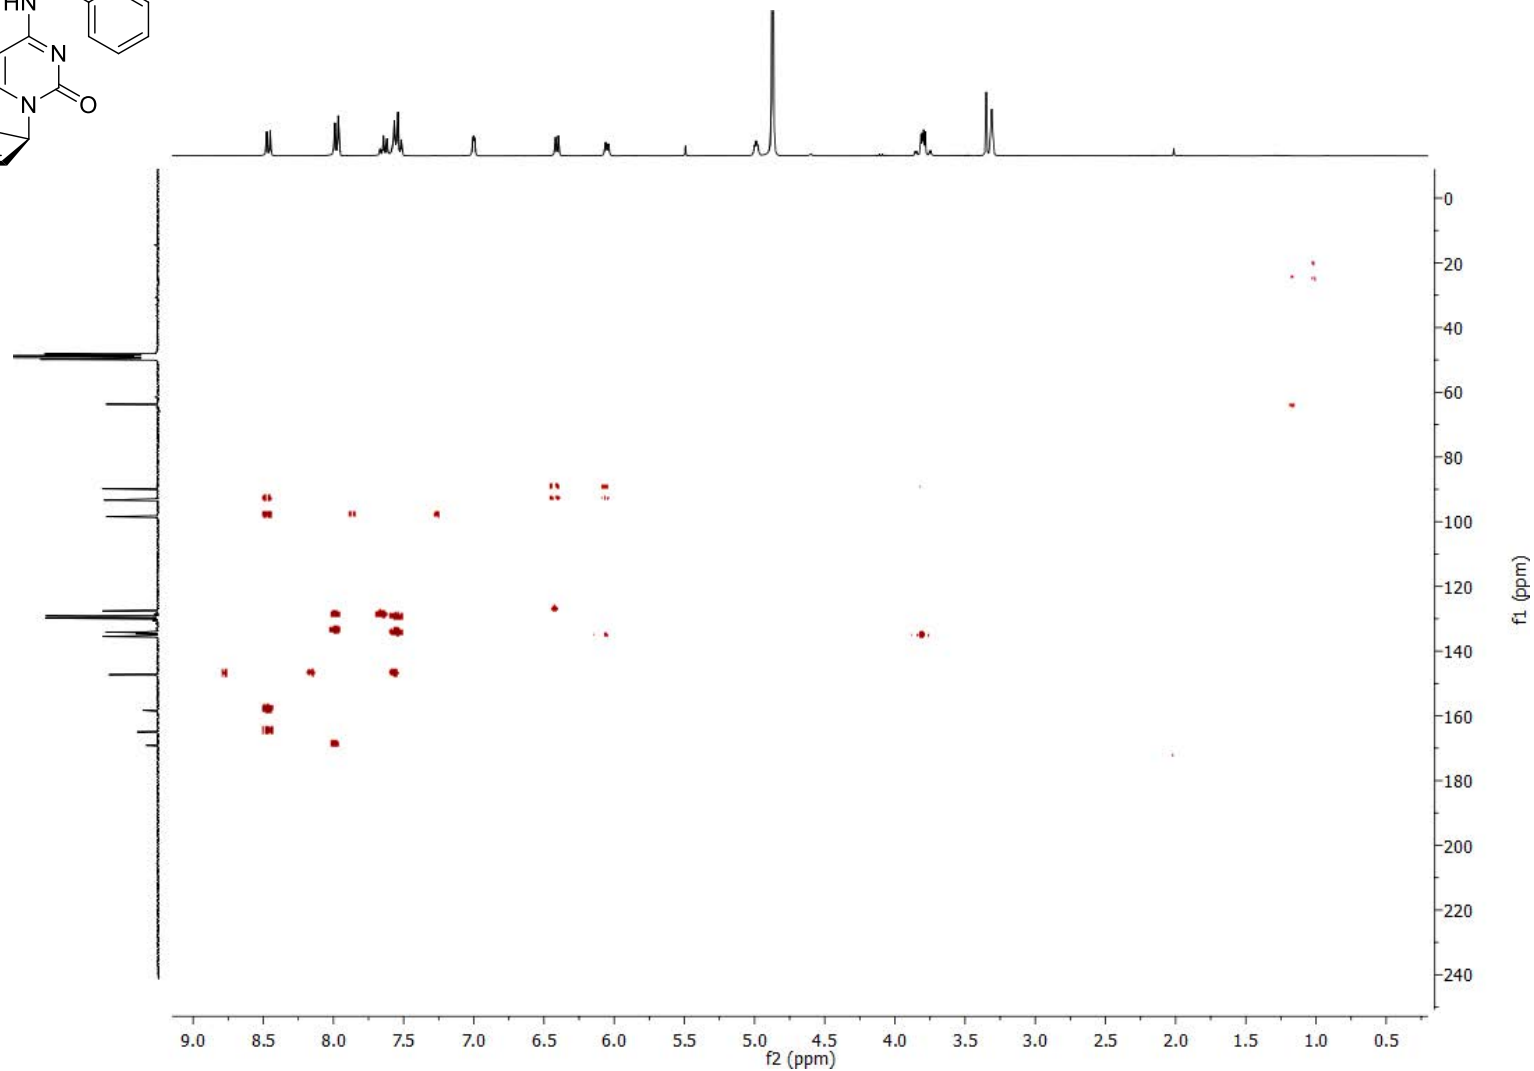



## 2',3'-Didehydro-2',3'-dideoxy- $\beta$ -D-adenosine (8e)

$^1\text{H-NMR}$  (300.13 MHz,  $\text{MeOH-}d_4$ )

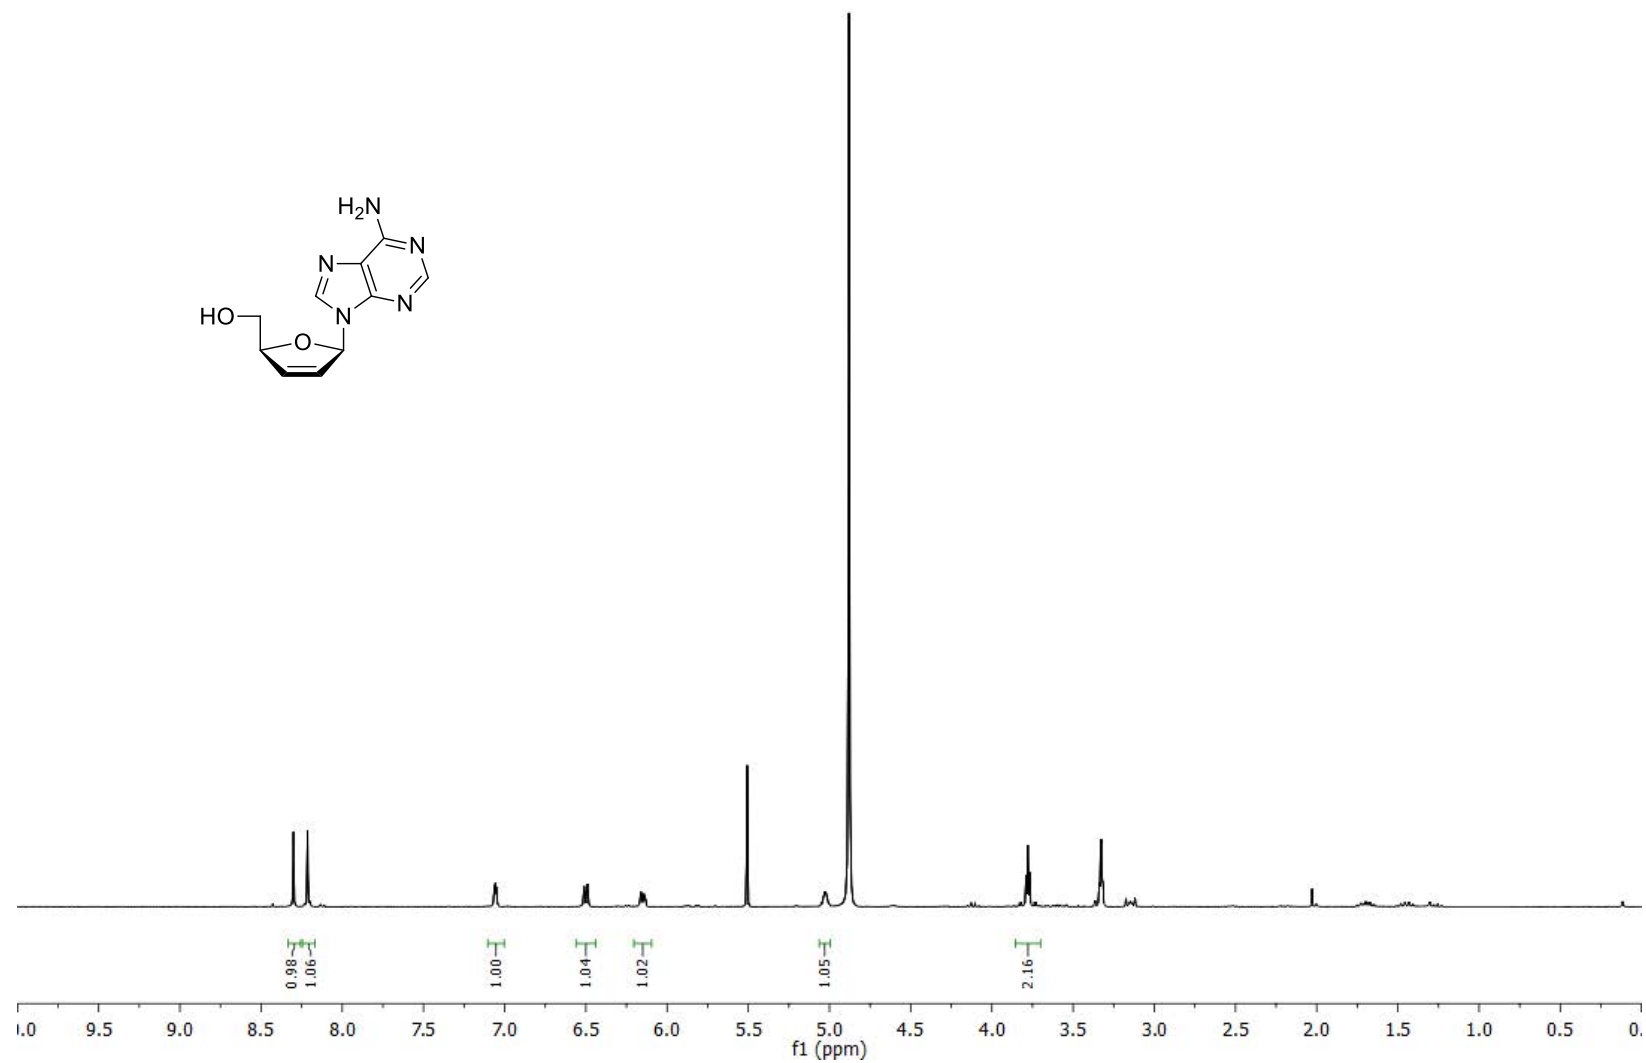

## 2',3'-Didehydro-2',3'-dideoxy- $\beta$ -D-adenosine (8e)

$^{13}\text{C}$ -NMR (75.5 MHz,  $\text{MeOH-}d_4$ )

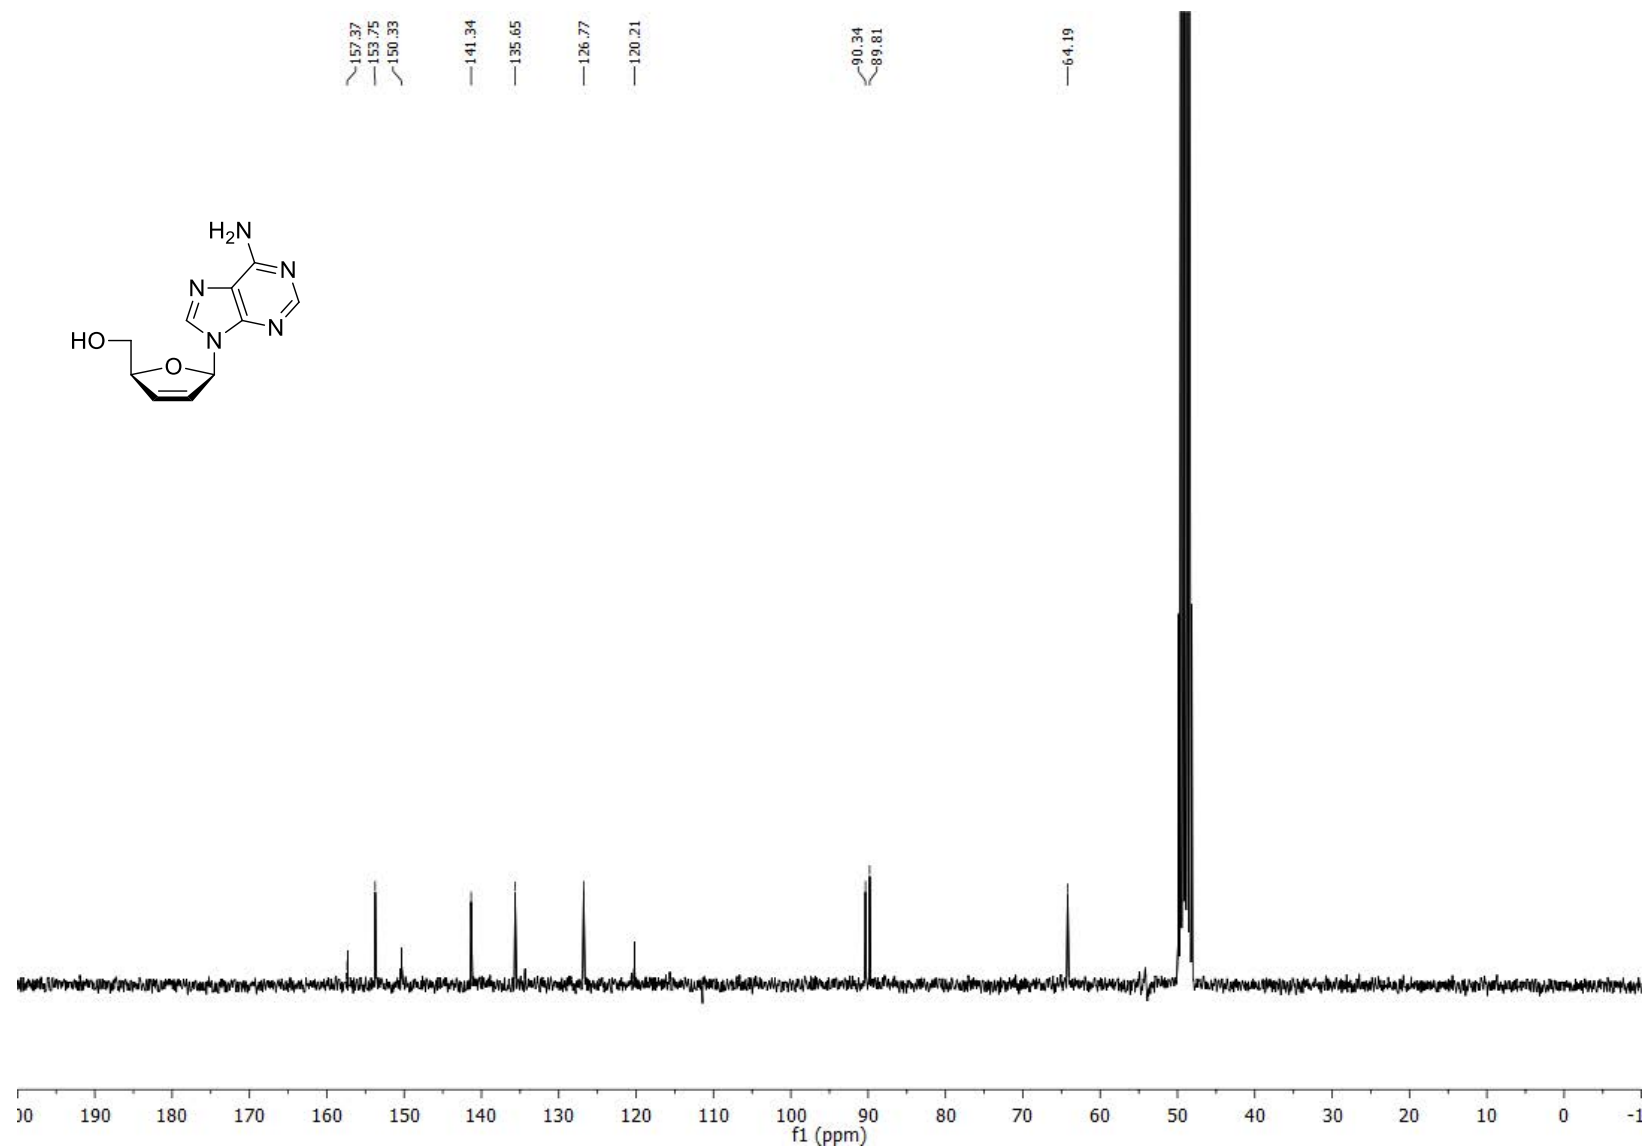

S130

# 2',3'-Didehydro-2',3'-dideoxy- $\beta$ -D-inosine (8f)

$^1\text{H-NMR}$  (300.13 MHz,  $\text{DMSO-}d_6$ )

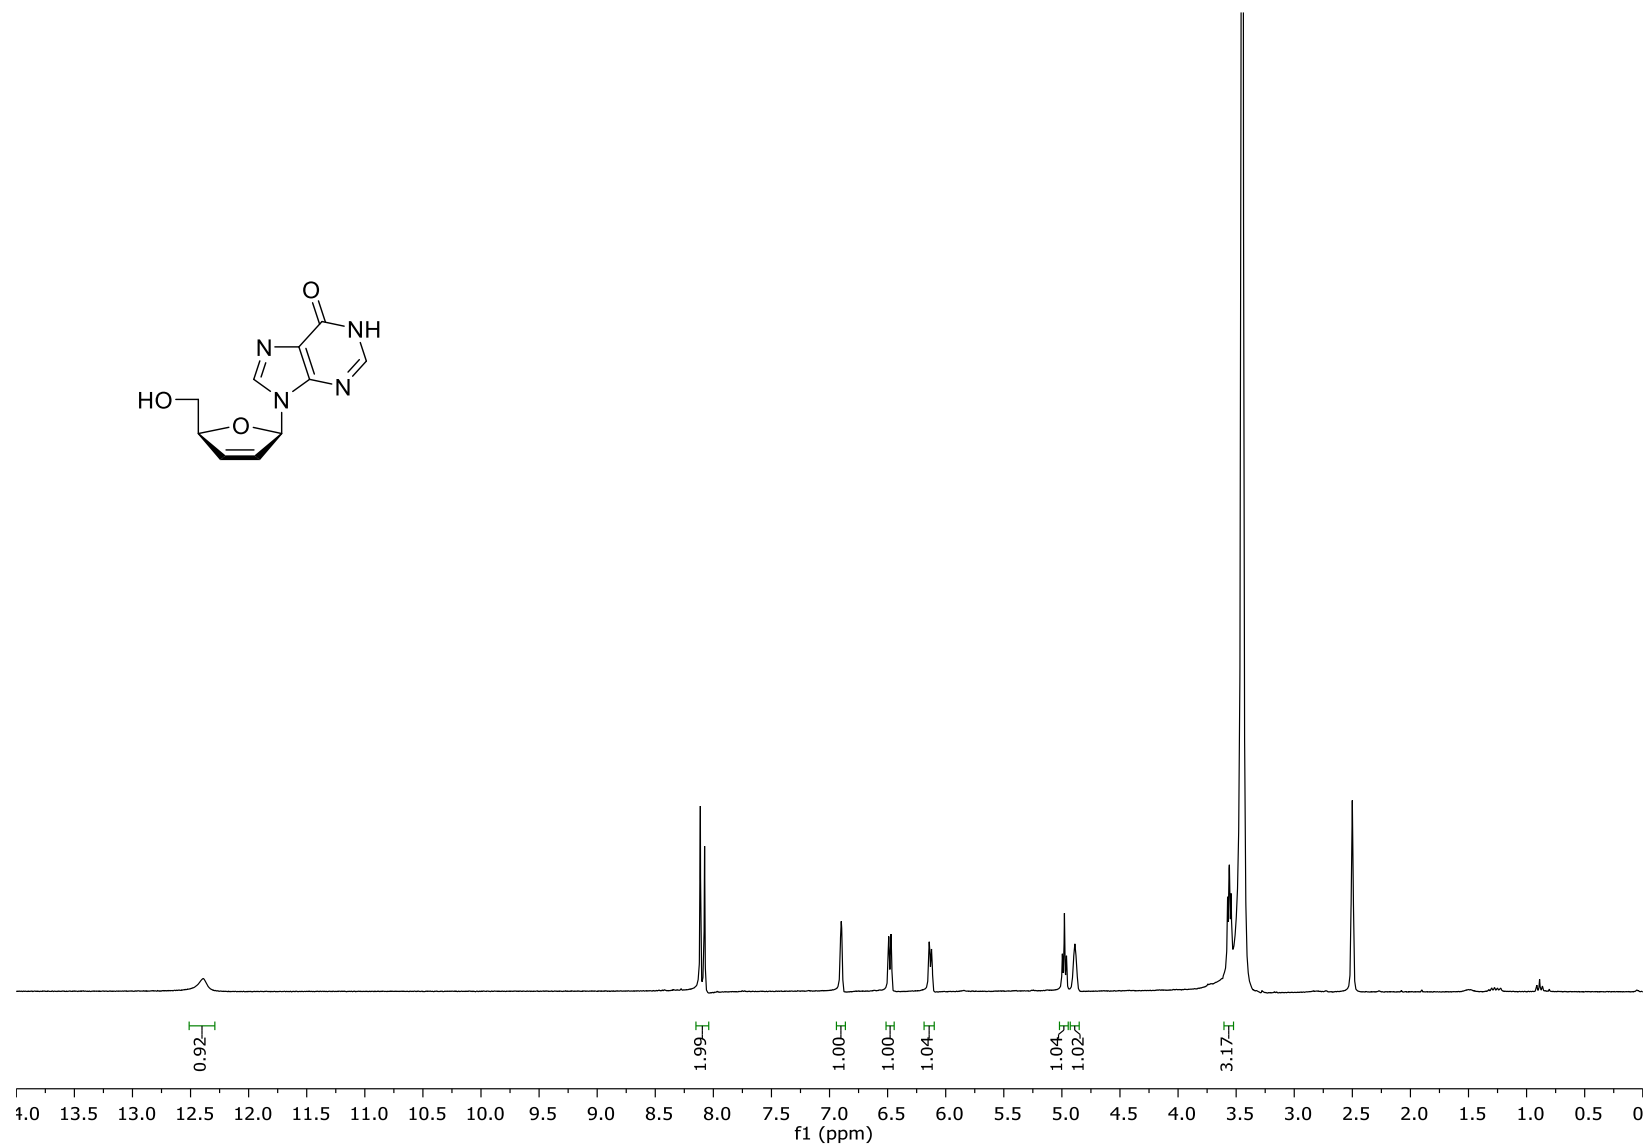

S131

## 2',3'-Didehydro-2',3'-dideoxy- $\beta$ -D-inosine (8f)

$^{13}\text{C}$ -NMR (75.5 MHz,  $\text{DMSO}-d_6$ )

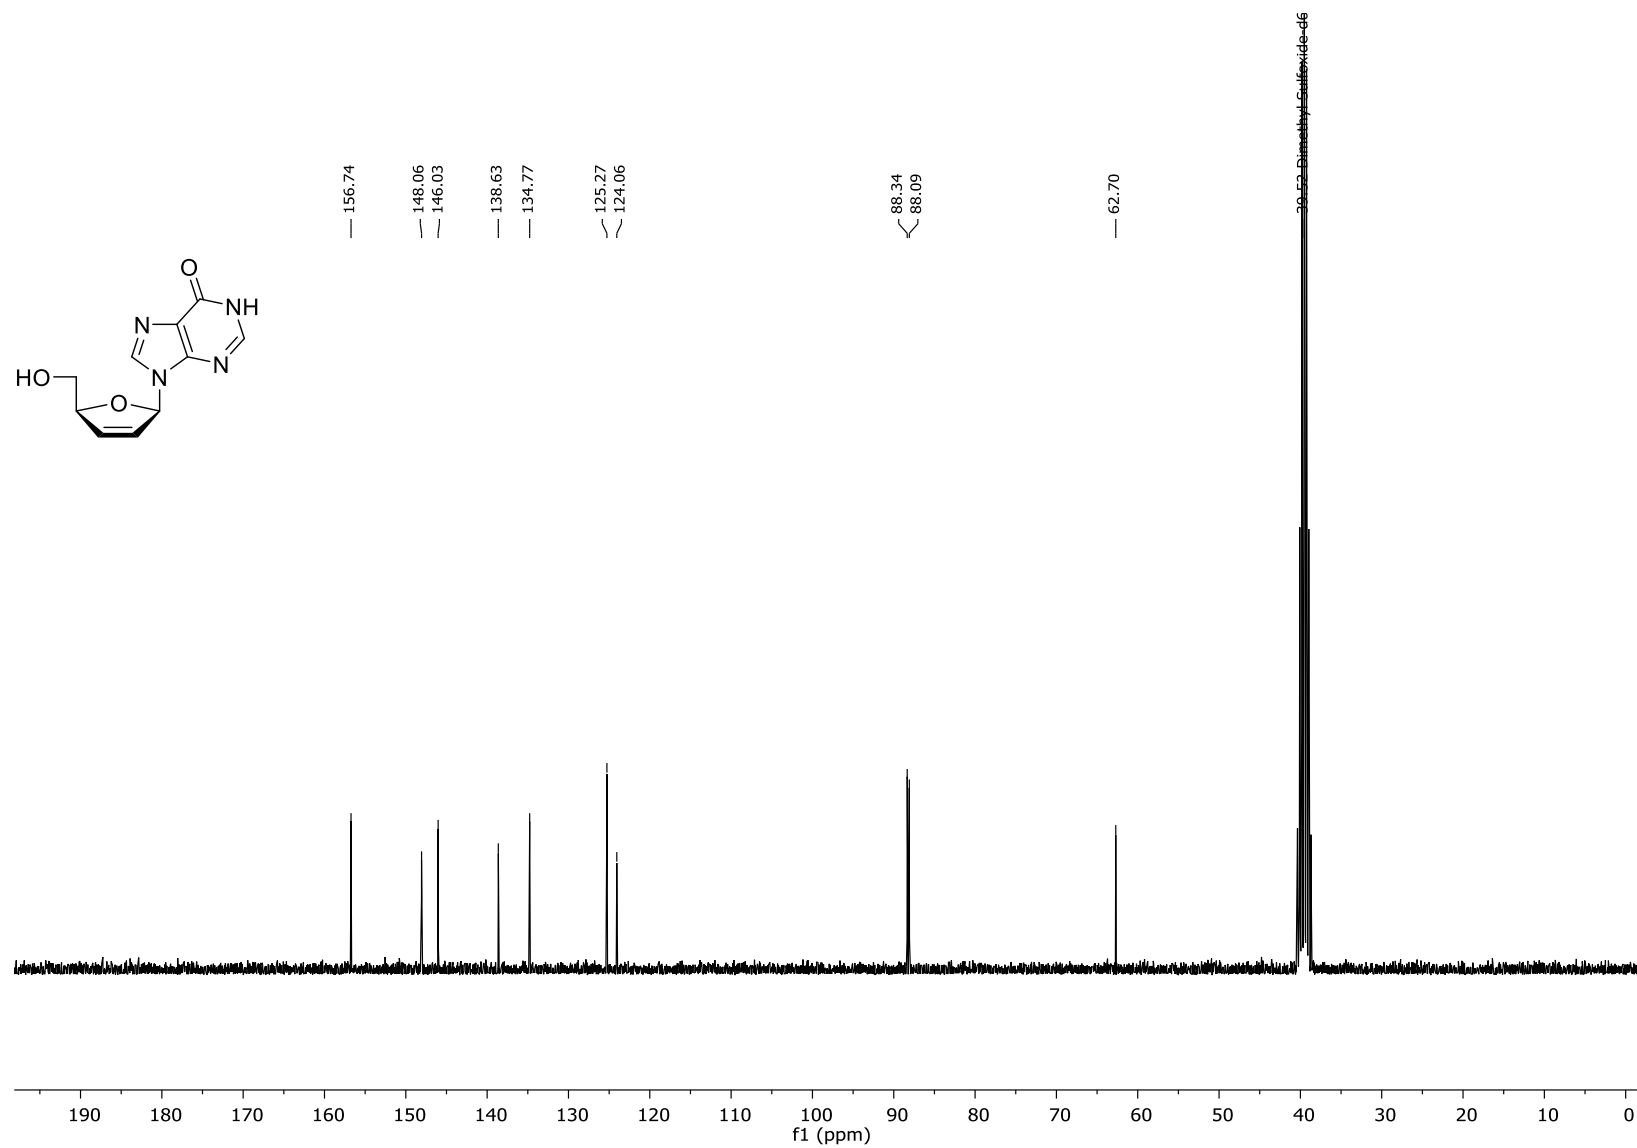

2',3'-Didehydro-2',3'-dideoxy- $\beta$ -D-inosine (8f)

COSY NMR (DMSO- $d_6$ )

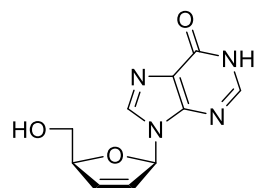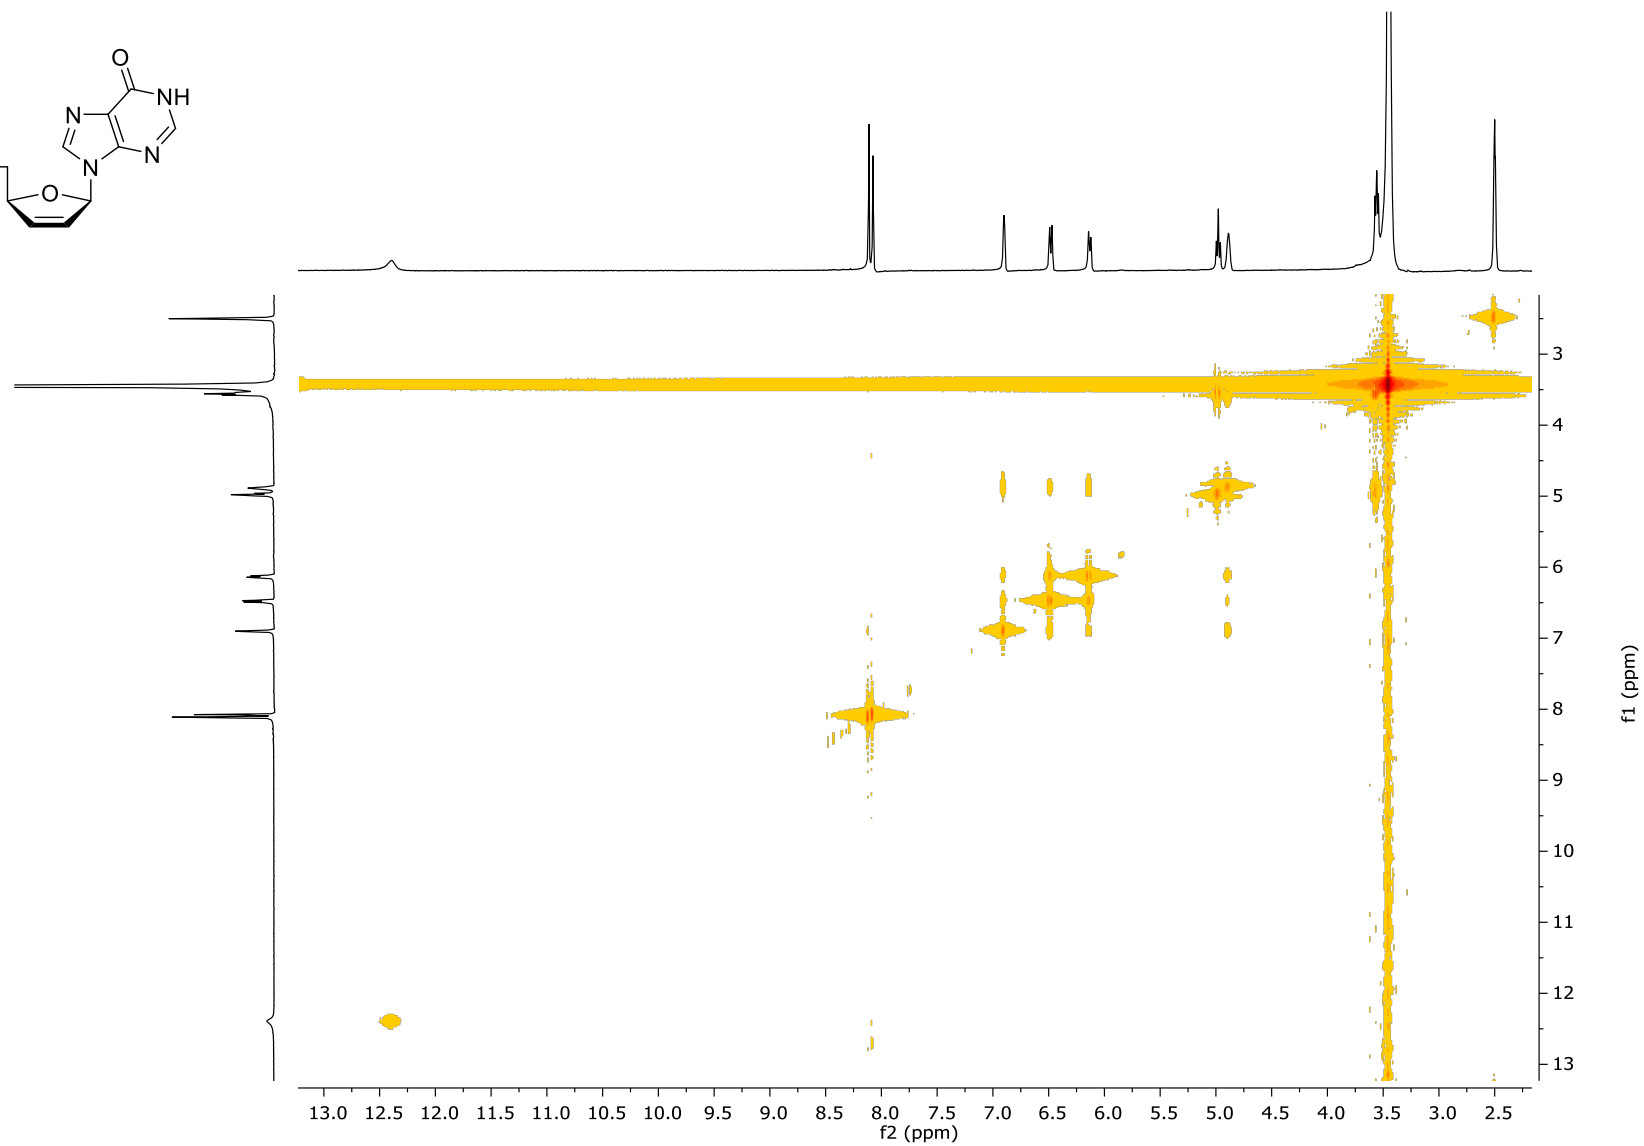

S133

## 2',3'-Didehydro-2',3'-dideoxy- $\beta$ -D-inosine (8f)

HSQC NMR (DMSO- $d_6$ )

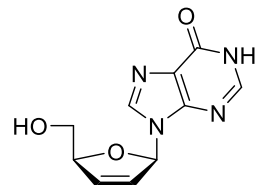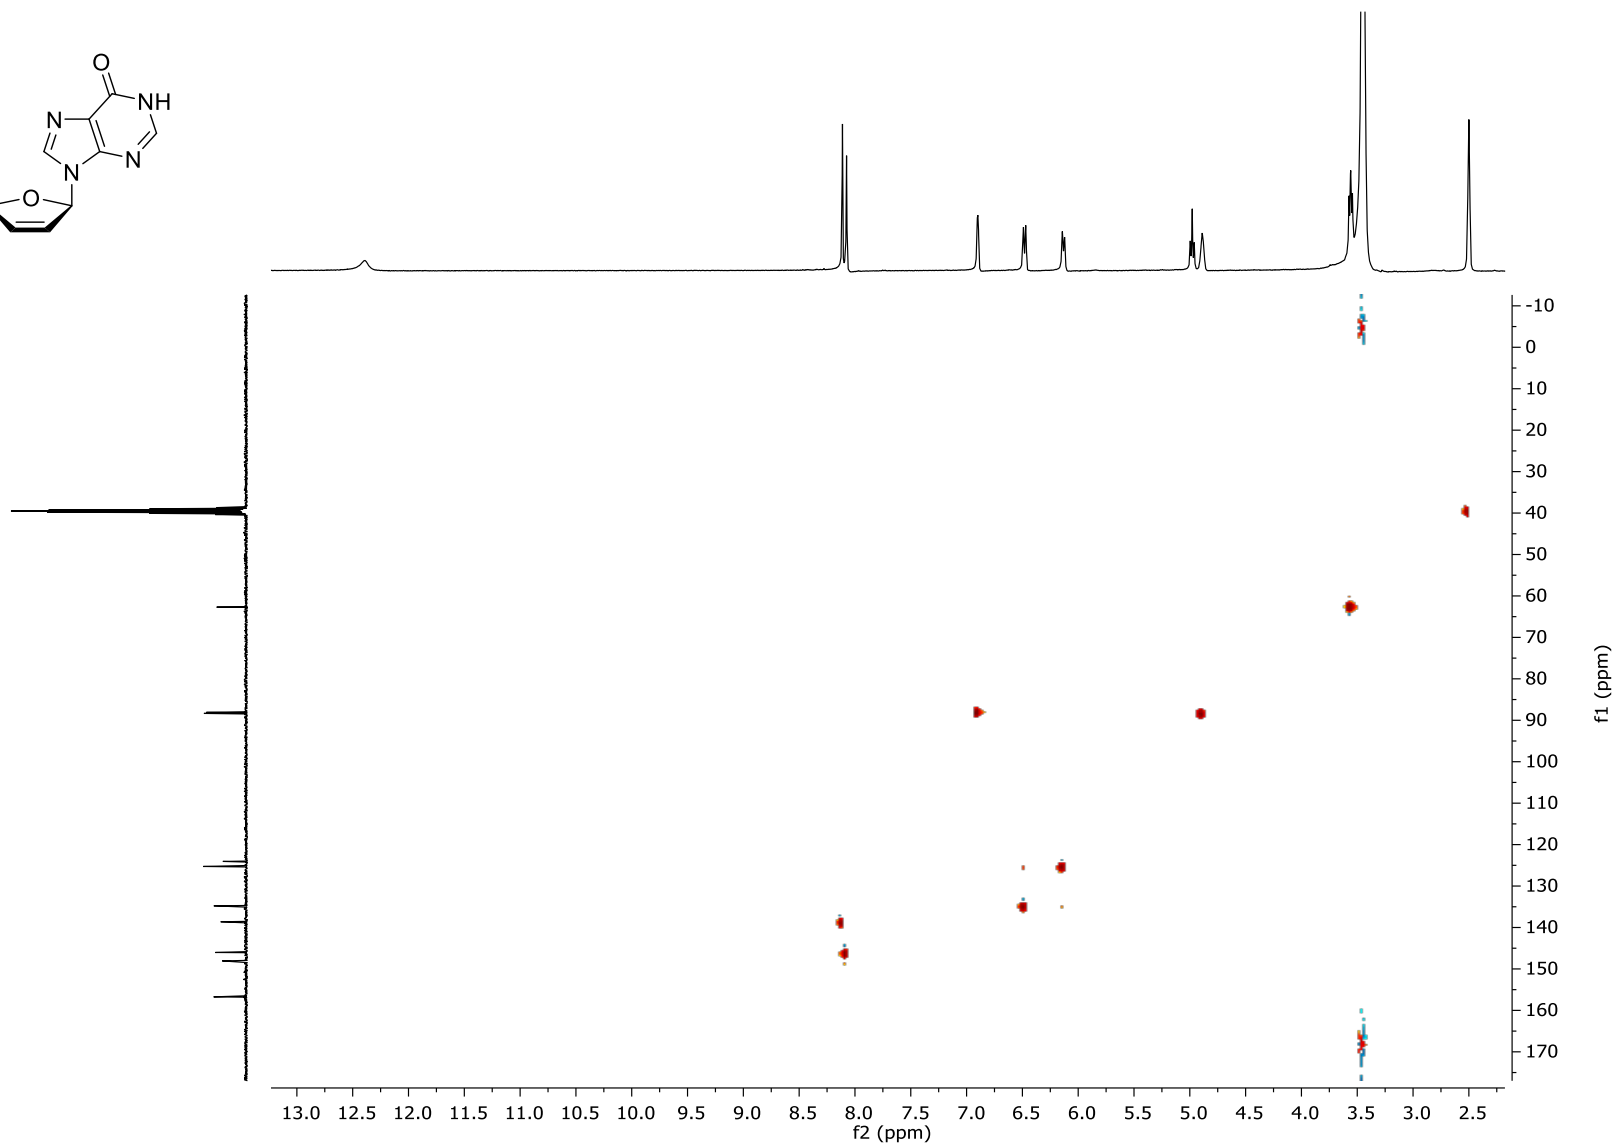

S134

**2',3'-Didehydro-2',3'-dideoxy- $\beta$ -D-inosine (8f)**

HMBC NMR (DMSO-*d*<sub>6</sub>)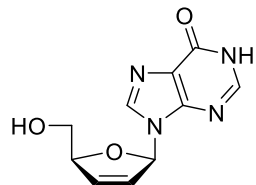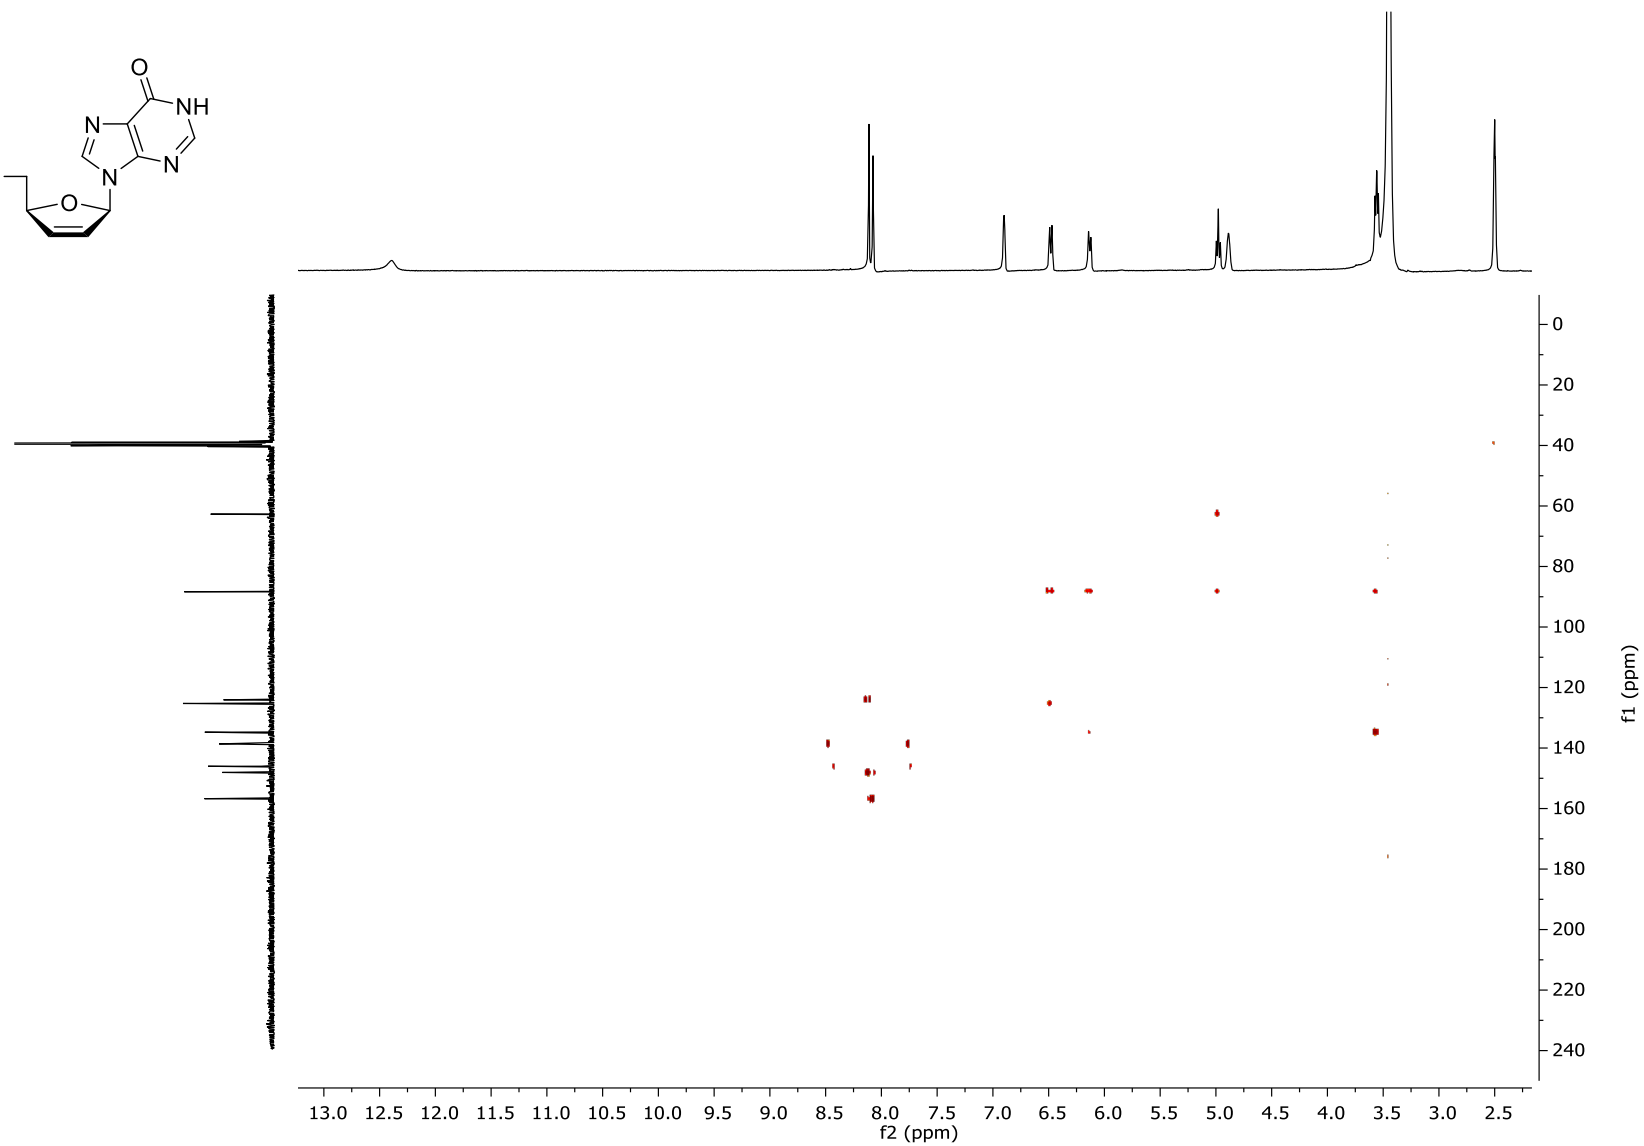

S135

## 2',3'-Dideoxy- $\beta$ -D-uridine (9a)

$^1\text{H}$ -NMR (300.13 MHz,  $\text{MeOH-}d_4$ )

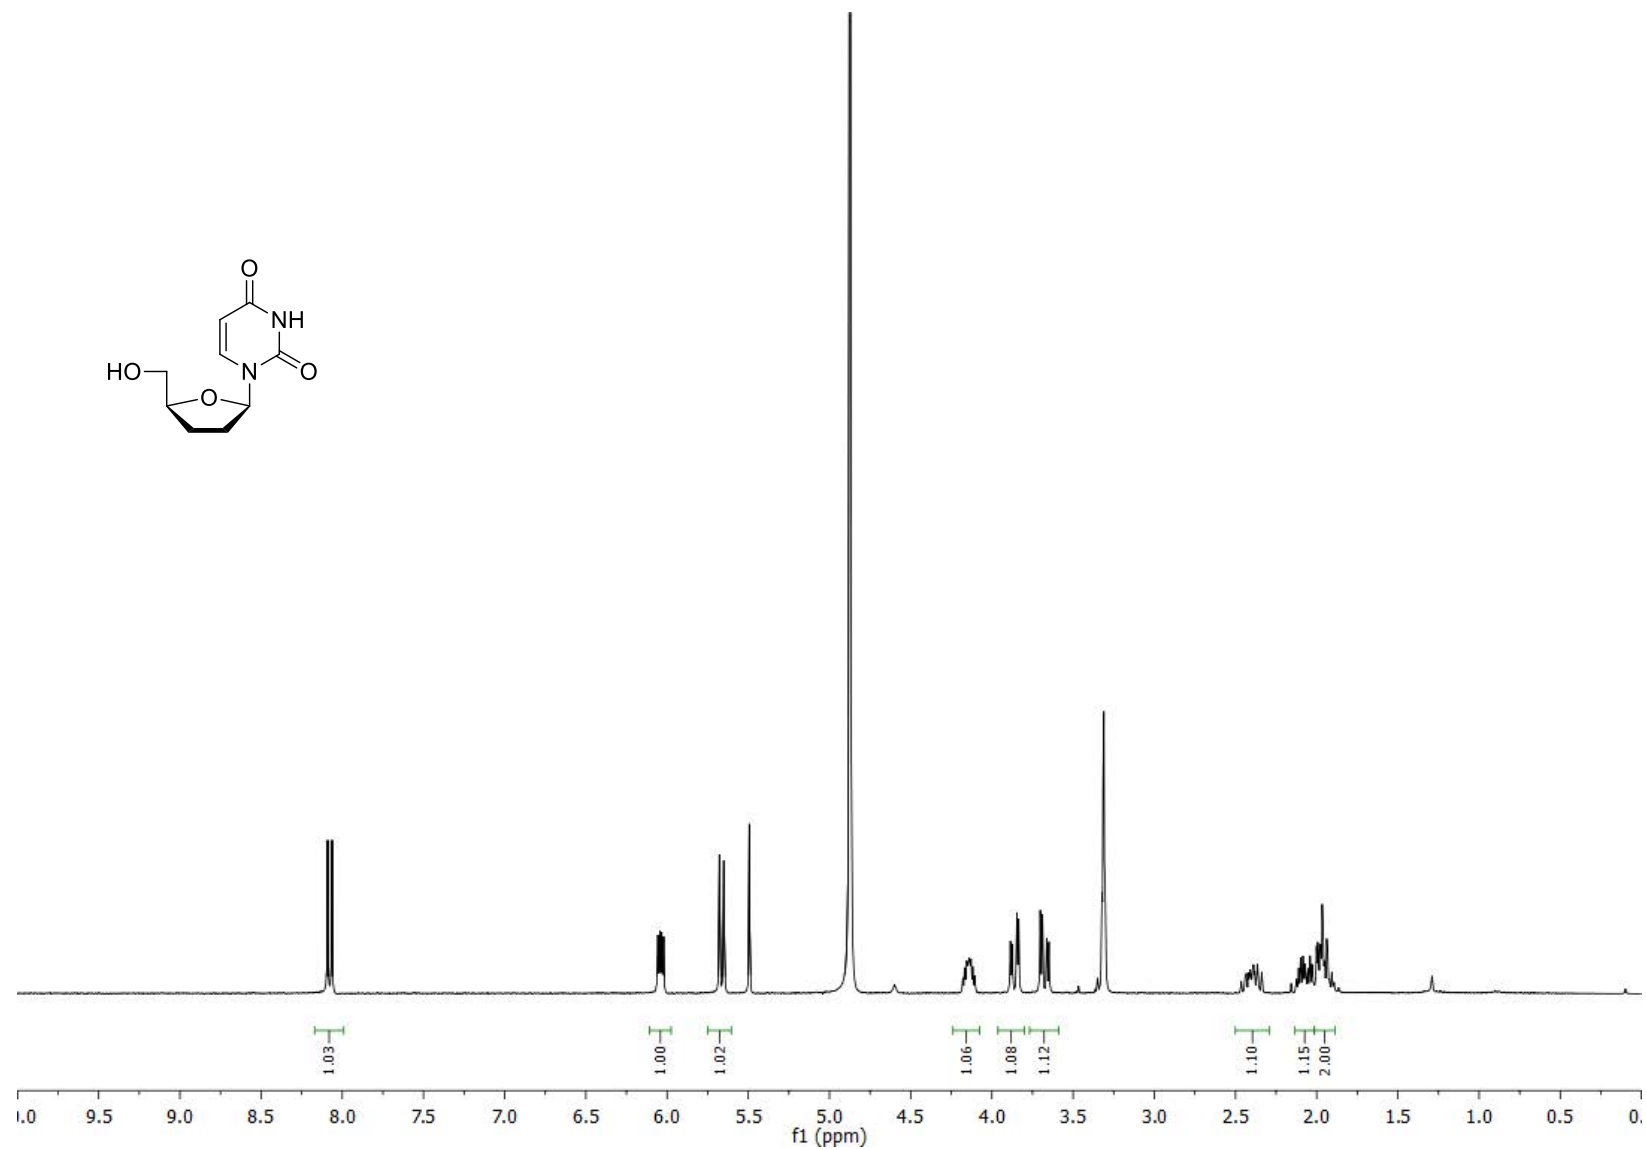

S136



## 2',3'-Dideoxy- $\beta$ -D-uridine (9a)

$^{13}\text{C}$ -NMR (75.5 MHz,  $\text{MeOH-}d_4$ )

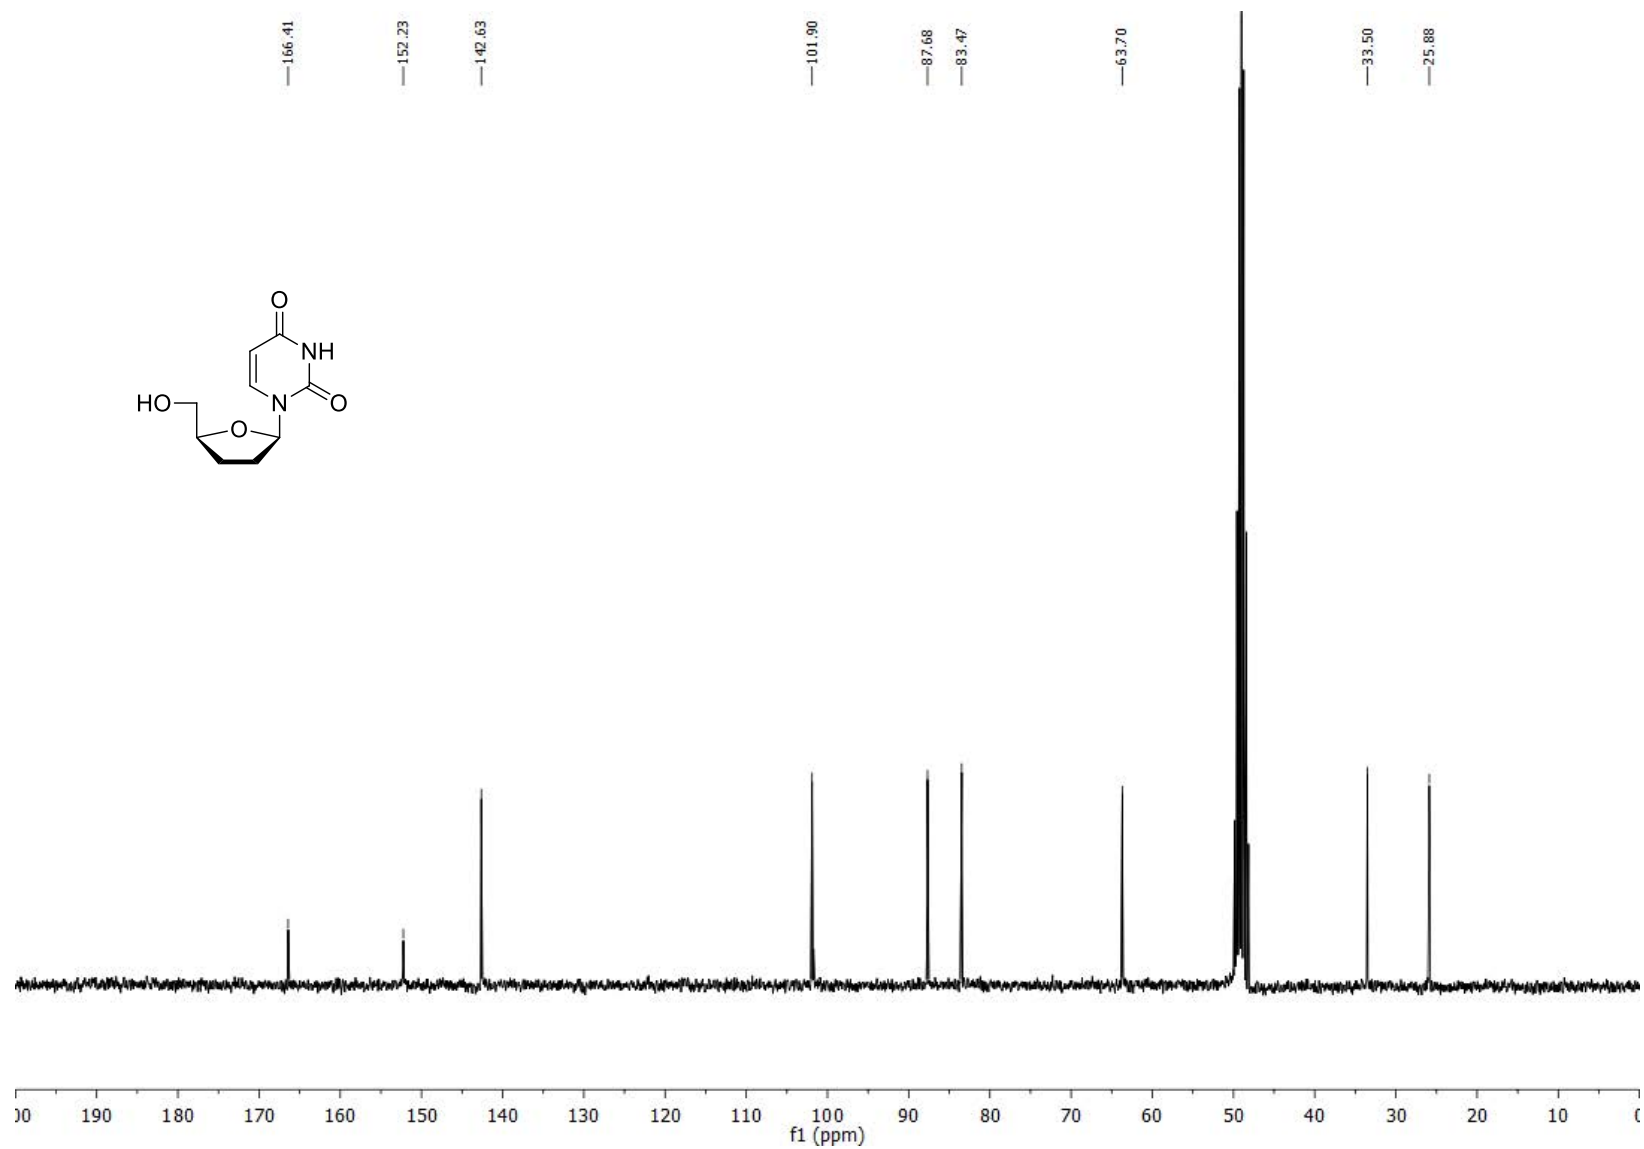

S137

## 2',3'-Dideoxy- $\beta$ -D-uridine (9a)

DEPT NMR (75.5 MHz, MeOH- $d_4$ )

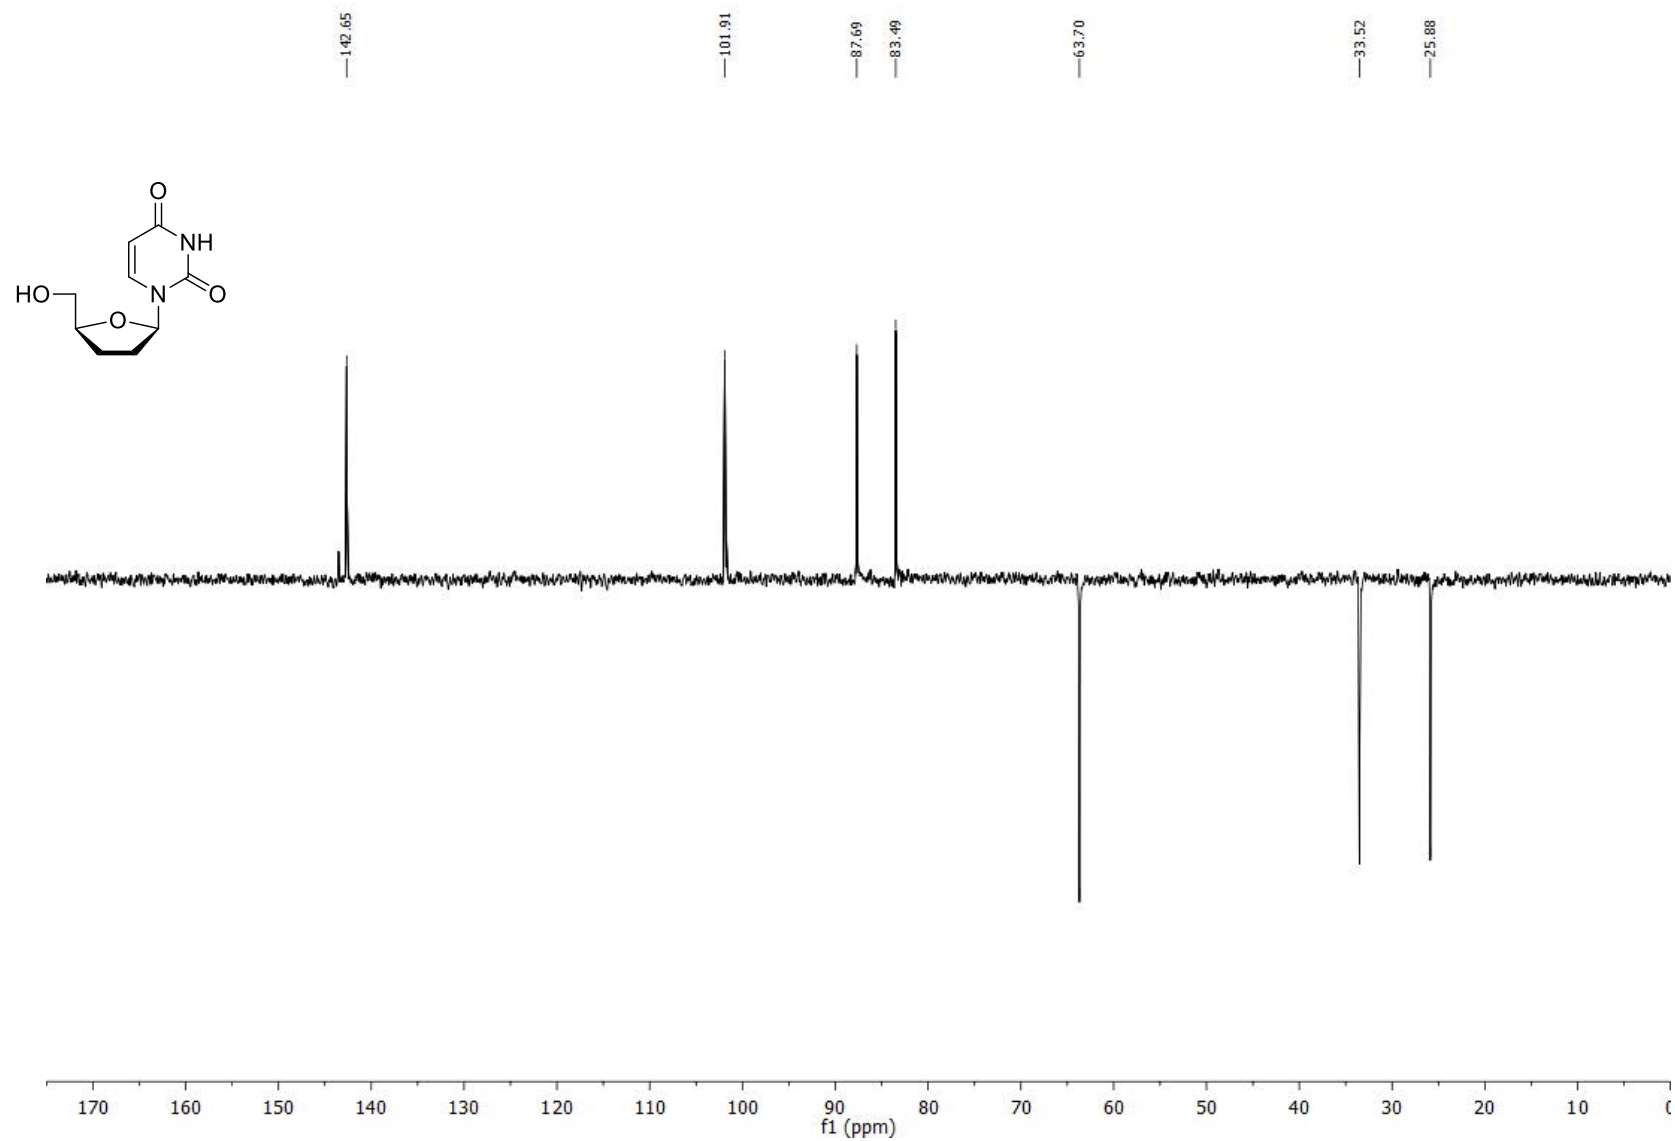

## 2',3'-Dideoxy- $\beta$ -D-uridine (9a)

COSY NMR (MeOH- $d_4$ )

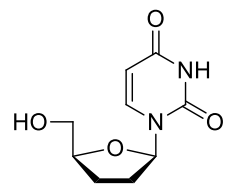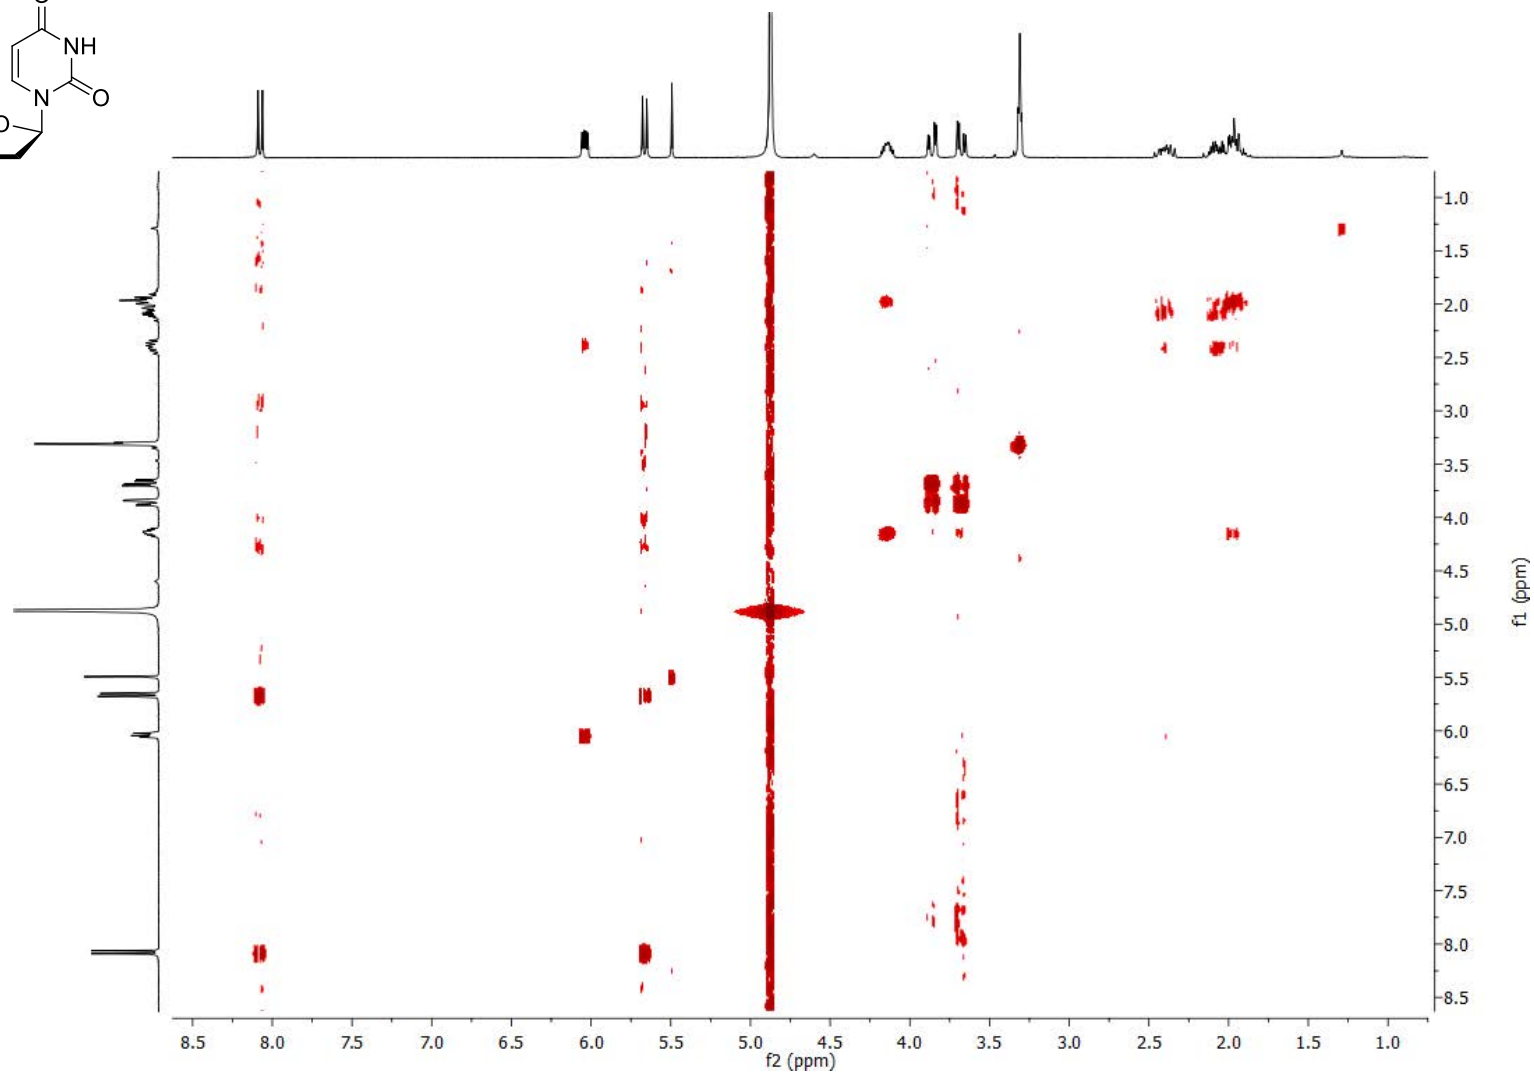

## 2',3'-Dideoxy- $\beta$ -D-uridine (9a)

HSQC NMR (MeOH- $d_4$ )

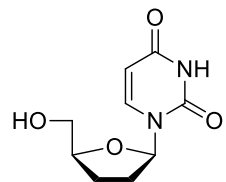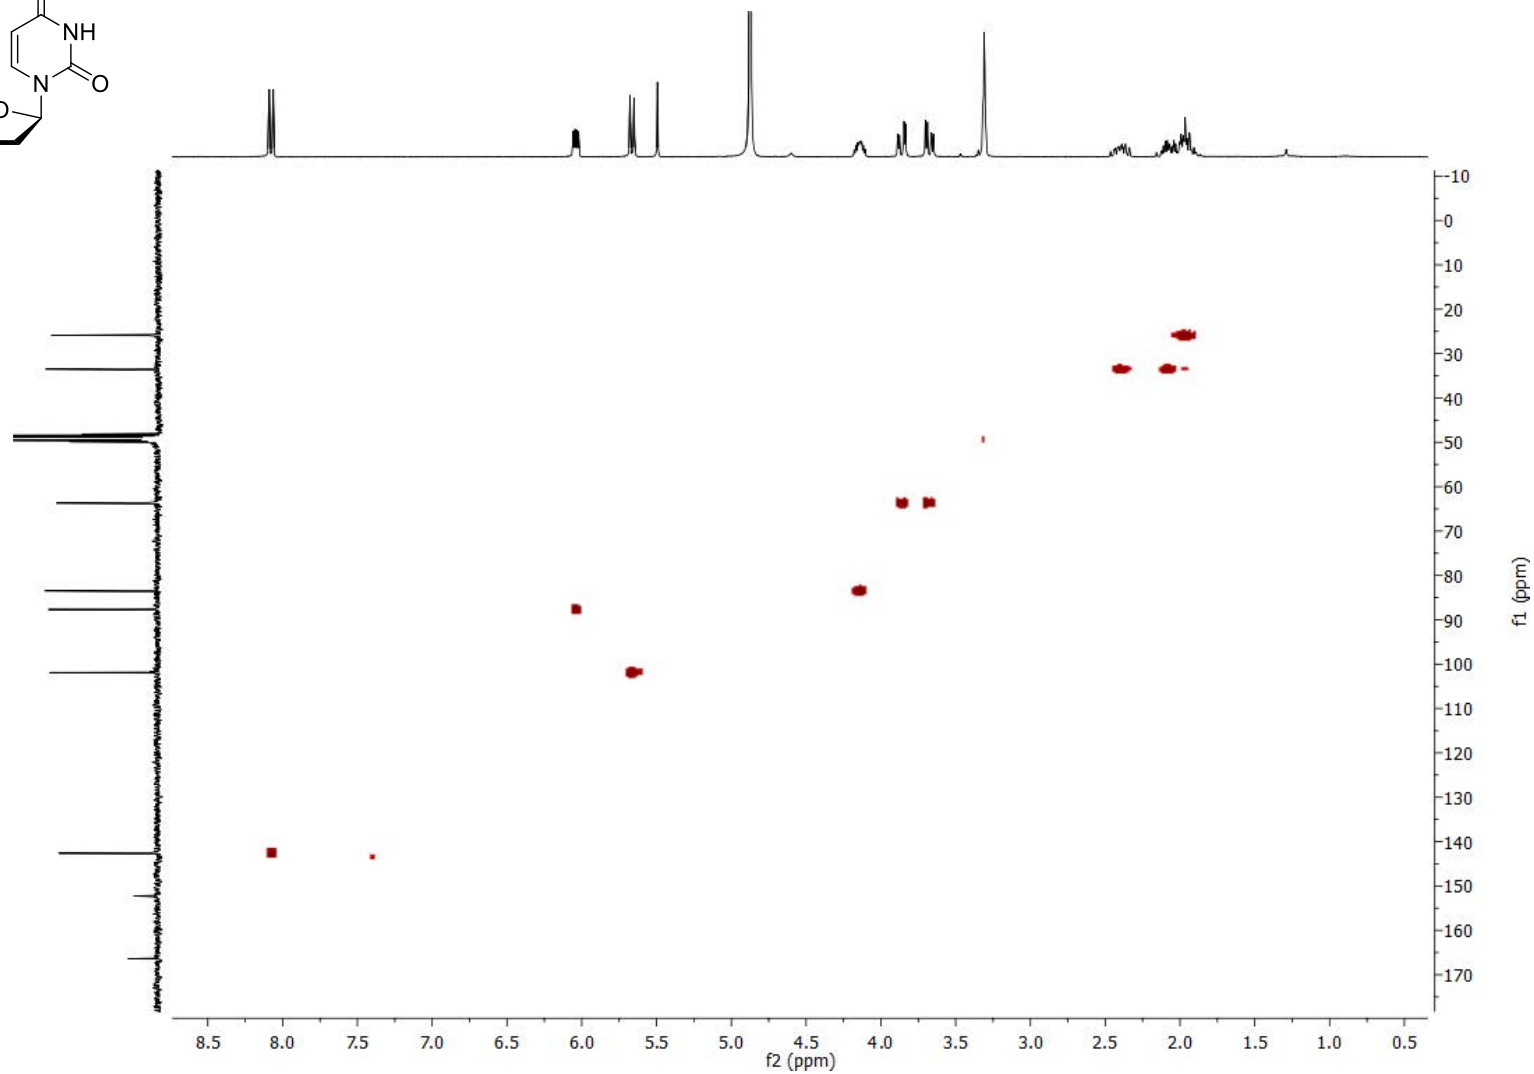

S140

### 3'-Deoxy- $\beta$ -D-5-thymidine (9b)

$^1\text{H}$ -NMR (300.13 MHz,  $\text{MeOH-}d_4$ )

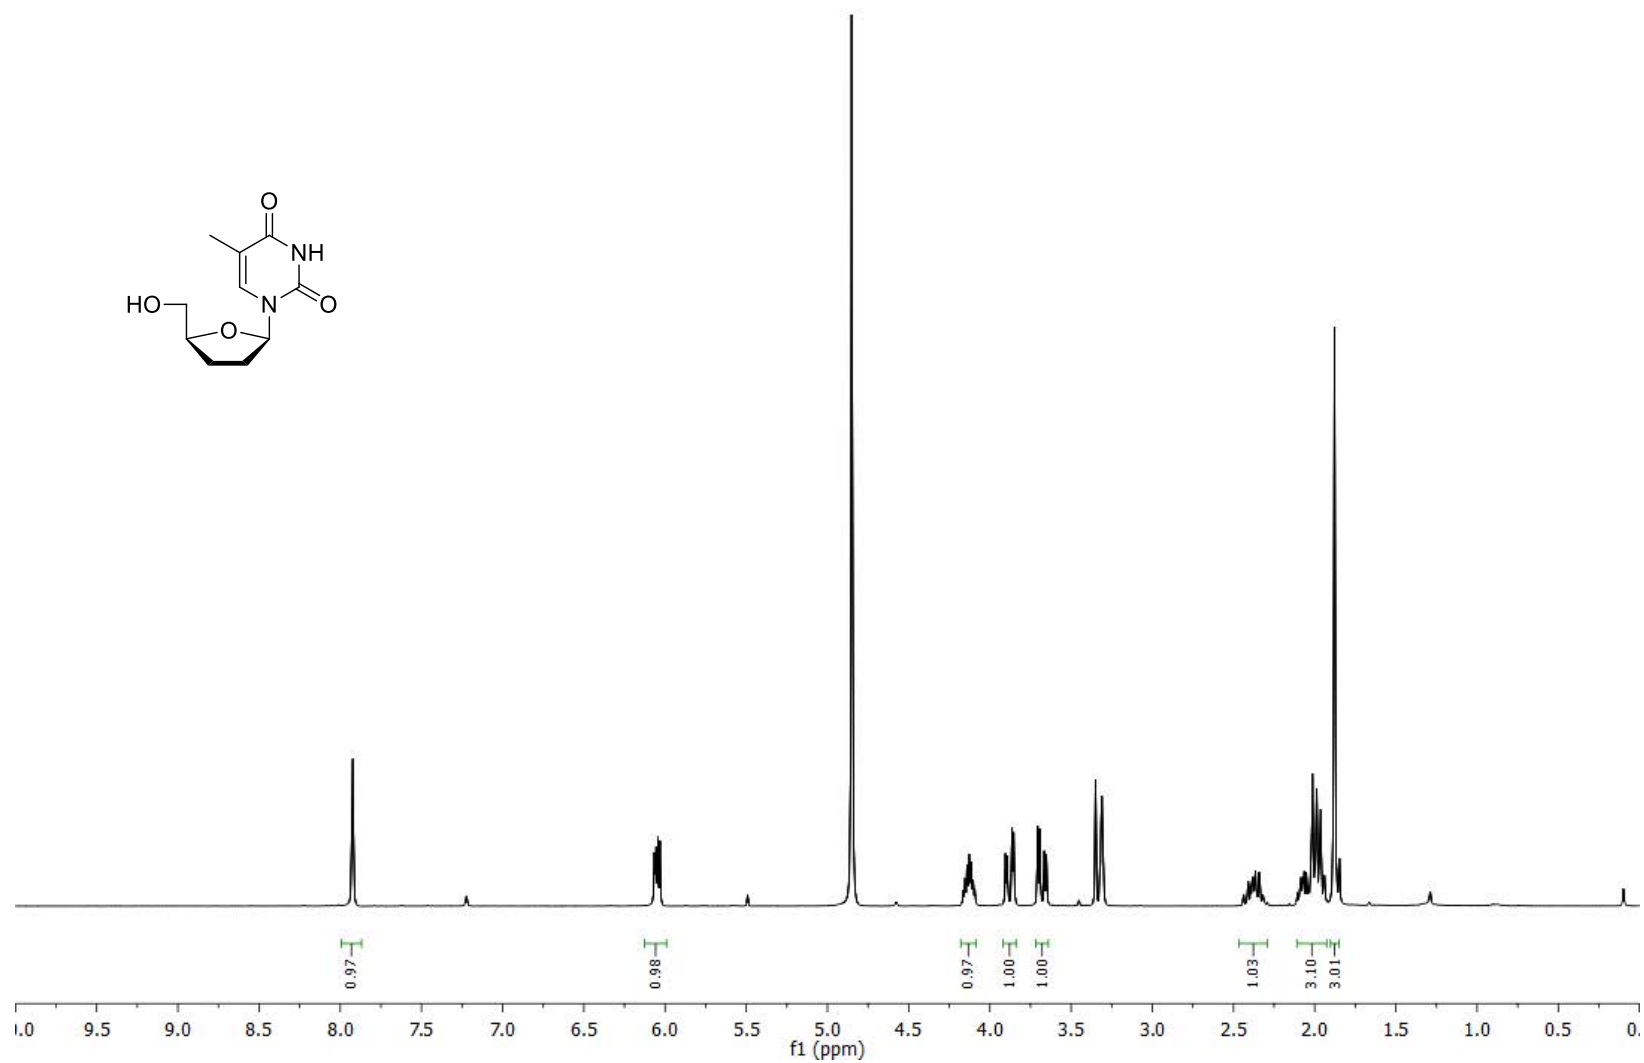

S141

### 3'-Deoxy-β-D-5-thymidine (9b)

$^{13}\text{C}$ -NMR (75.5 MHz,  $\text{MeOH-}d_4$ )

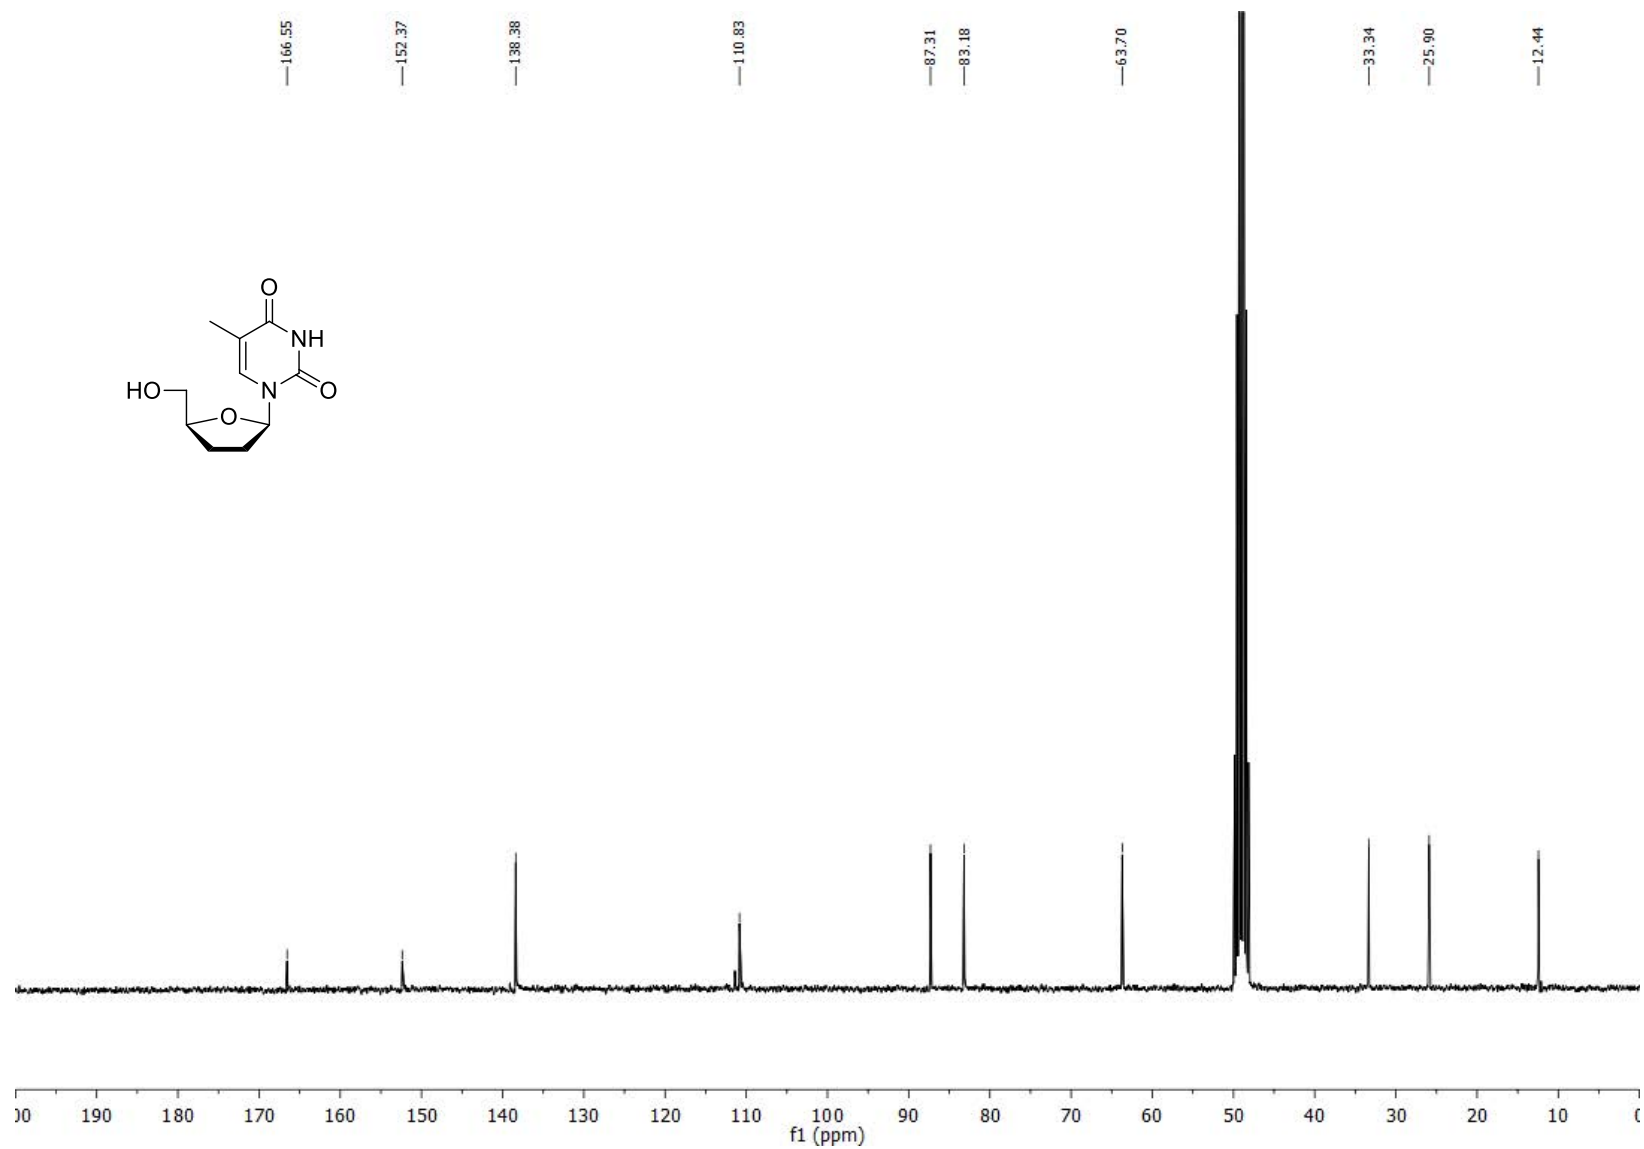

S142

### 3'-Deoxy- $\beta$ -D-5-thymidine (9b)

DEPT NMR (75.5 MHz, MeOH- $d_4$ )

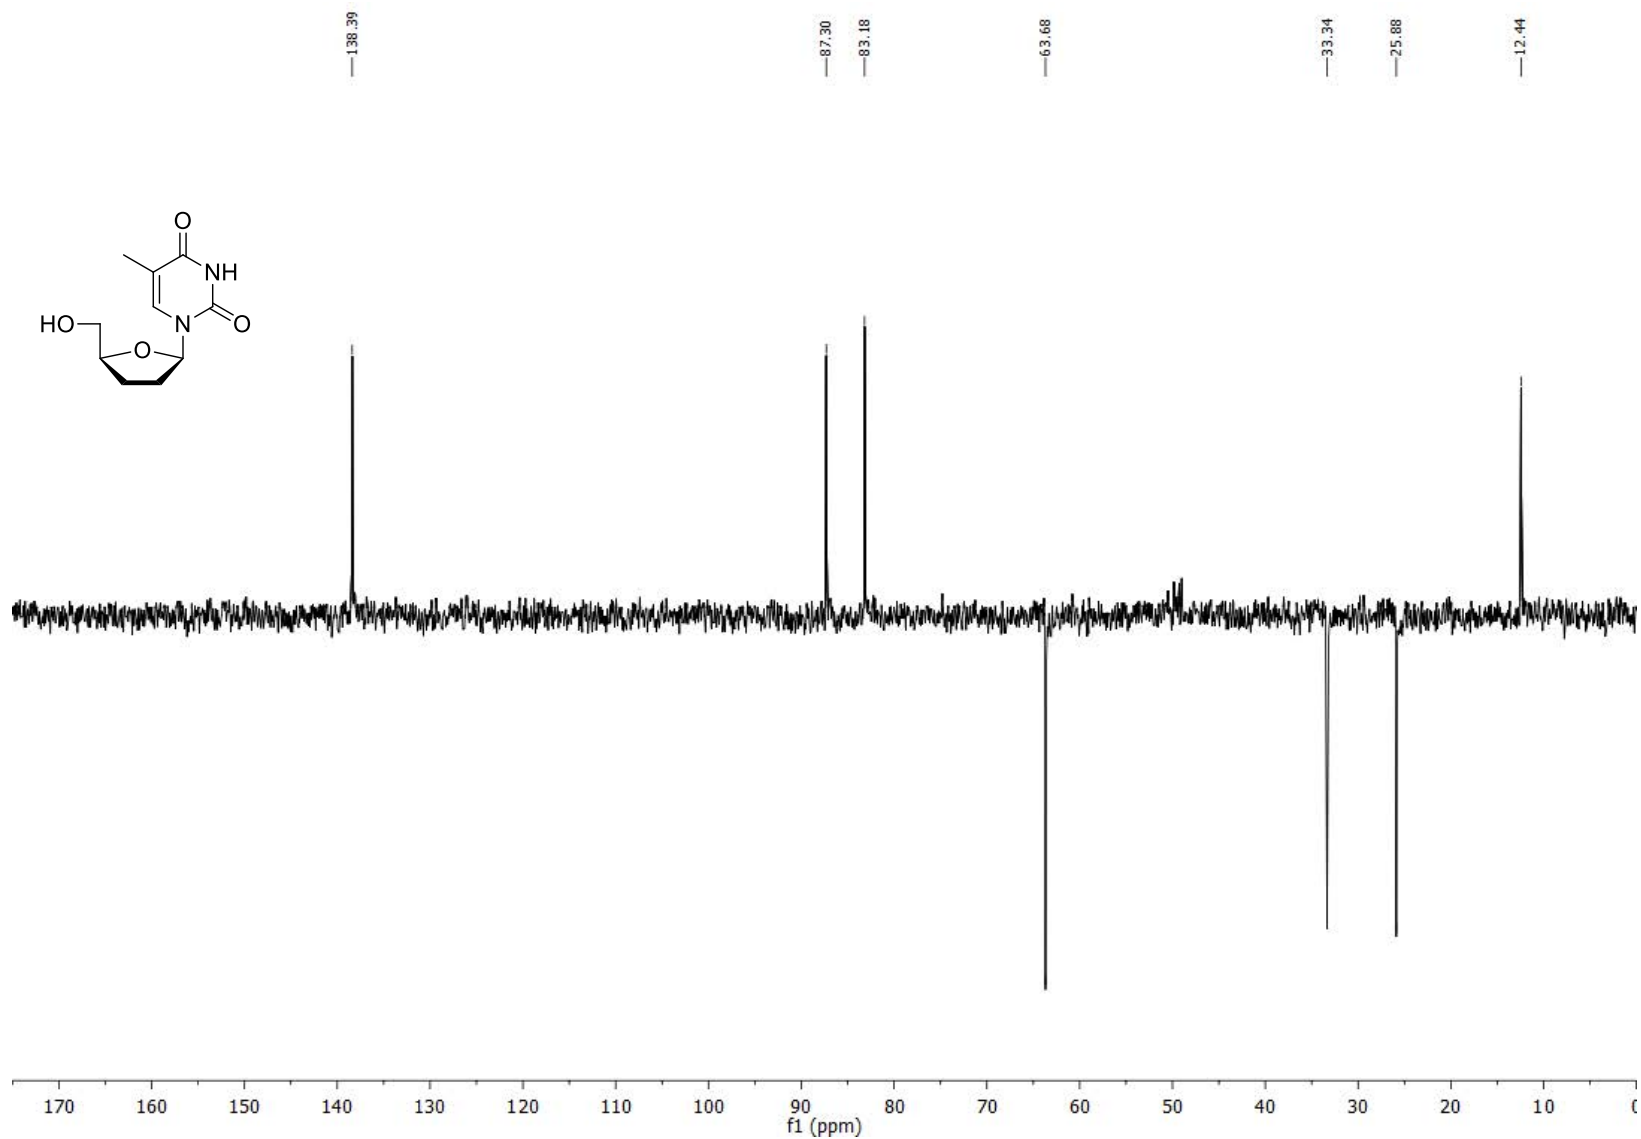

### 3'-Deoxy- $\beta$ -D-5-thymidine (9b)

COSY NMR (MeOH- $d_4$ )

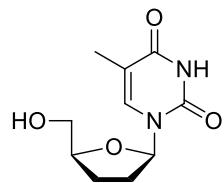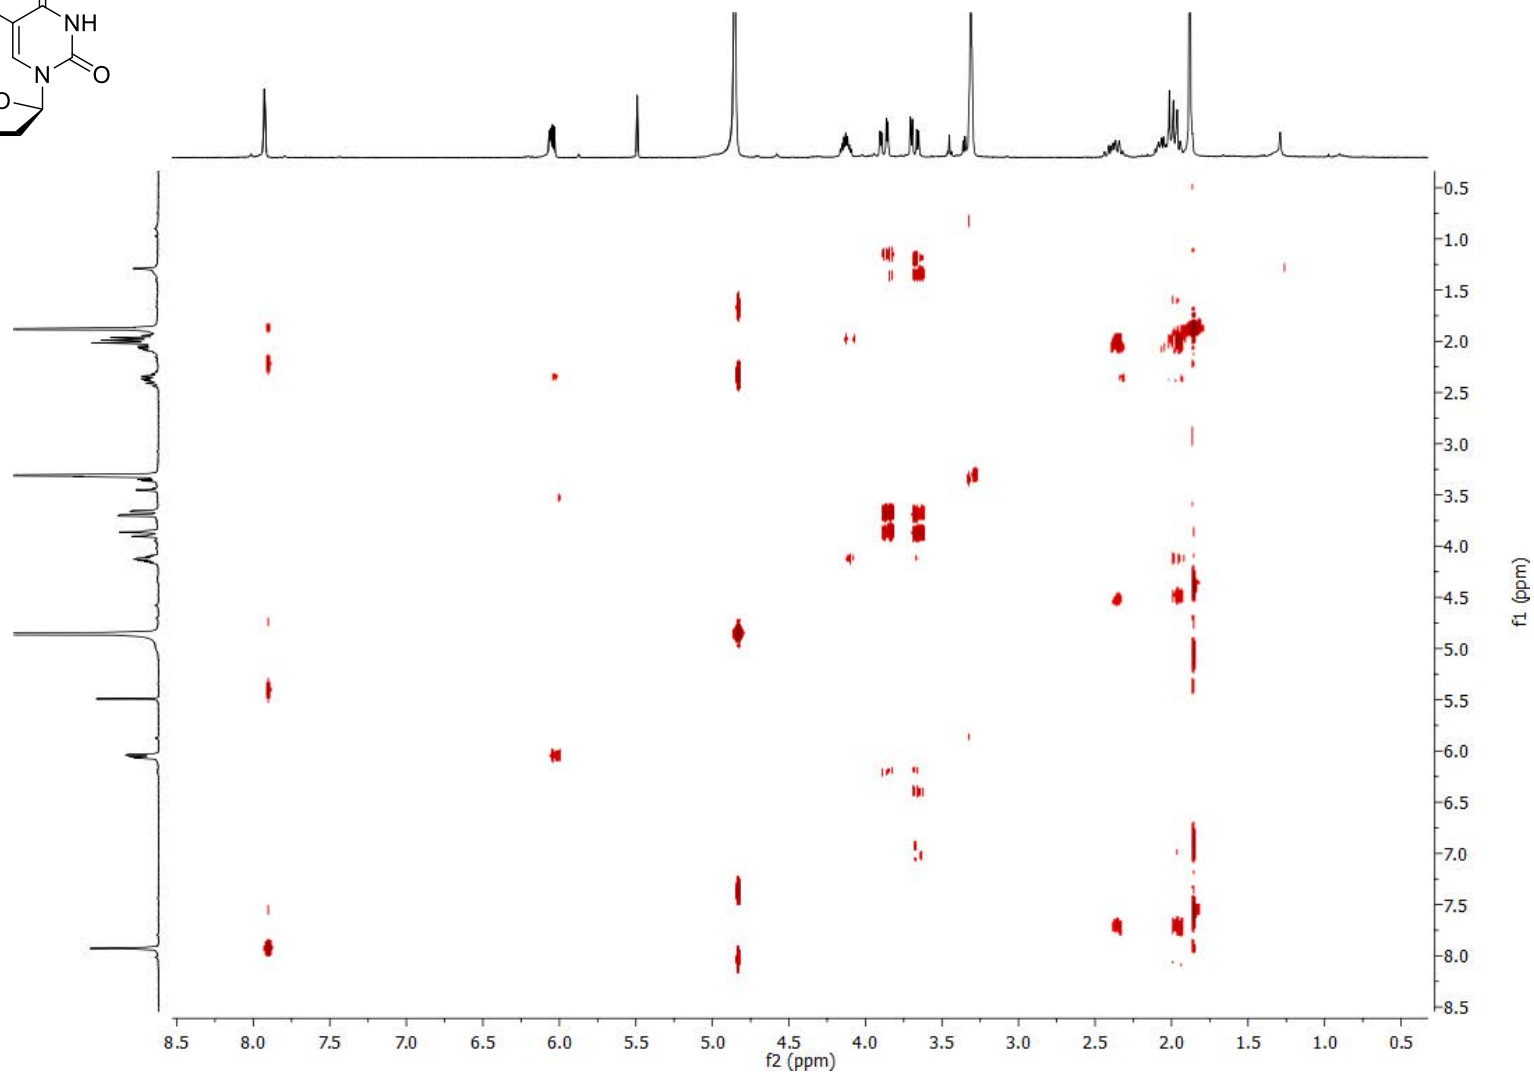

S144



### 3'-Deoxy- $\beta$ -D-5-thymidine (9b)

HSQC NMR (MeOH- $d_4$ )

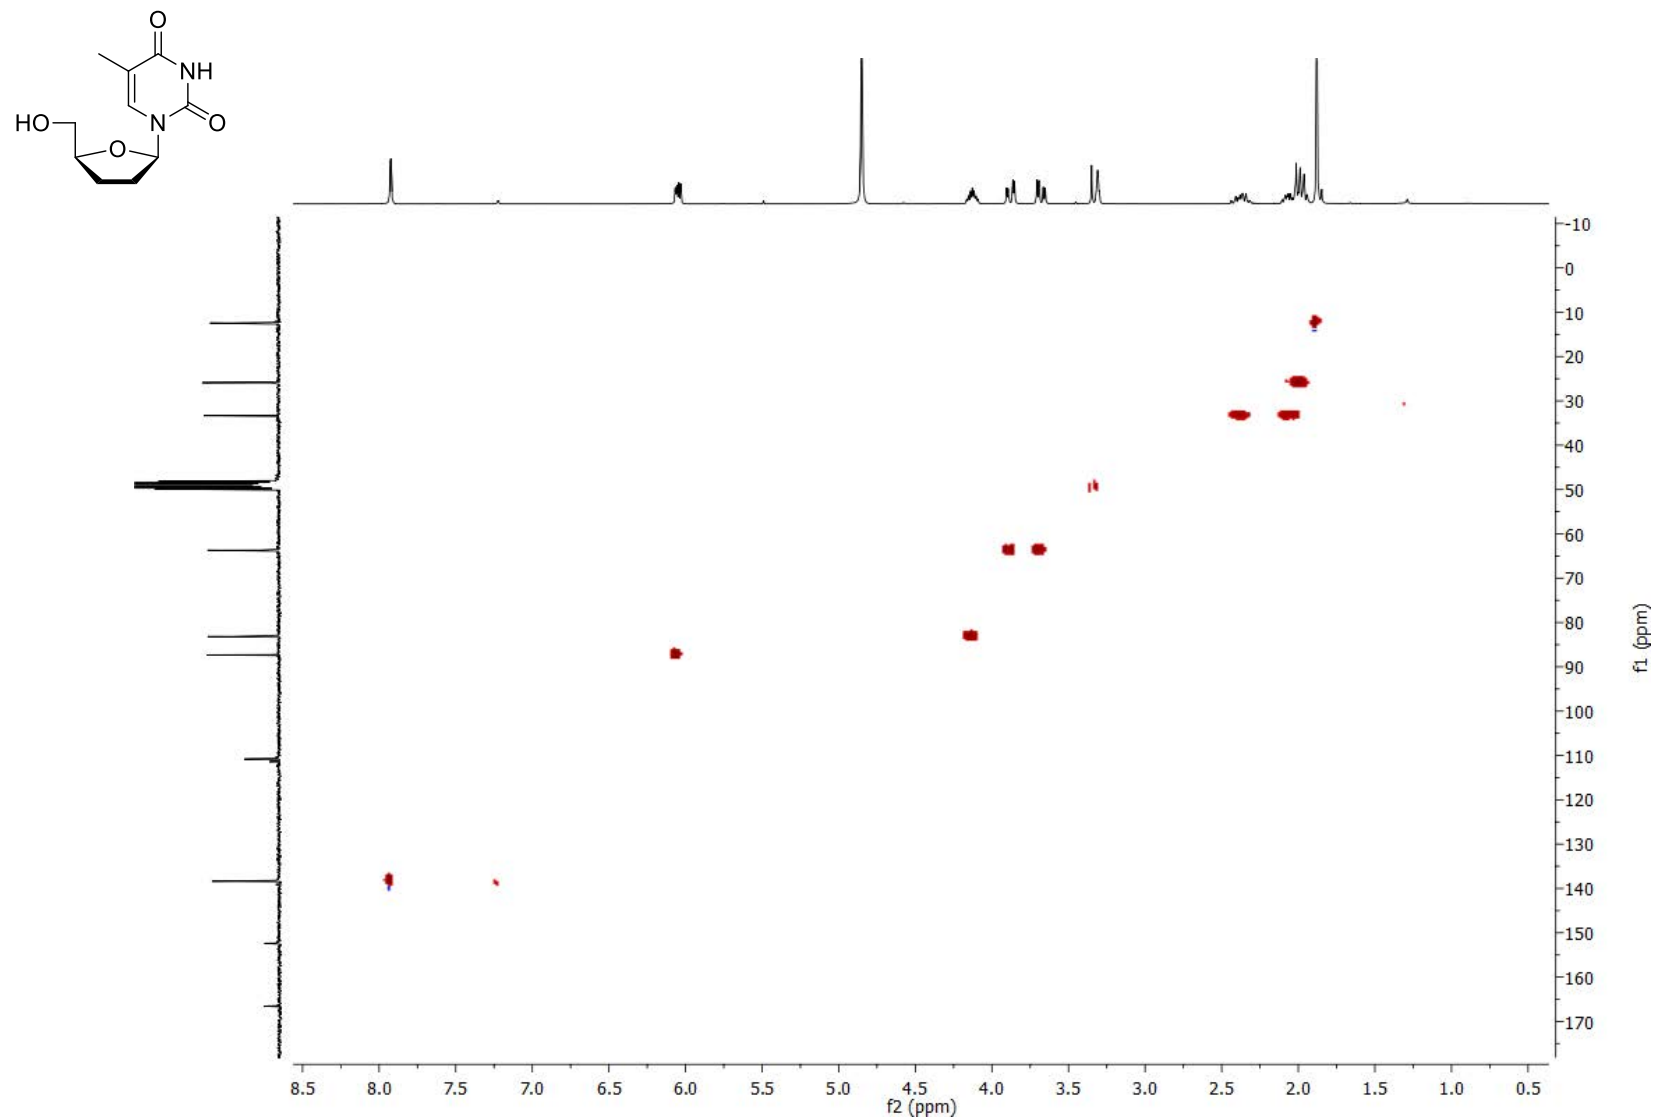

S145

## 2',3'-Dideoxy- $\beta$ -D-cytidine (9c)

$^1\text{H}$ -NMR (300.13 MHz,  $\text{D}_2\text{O}$ )

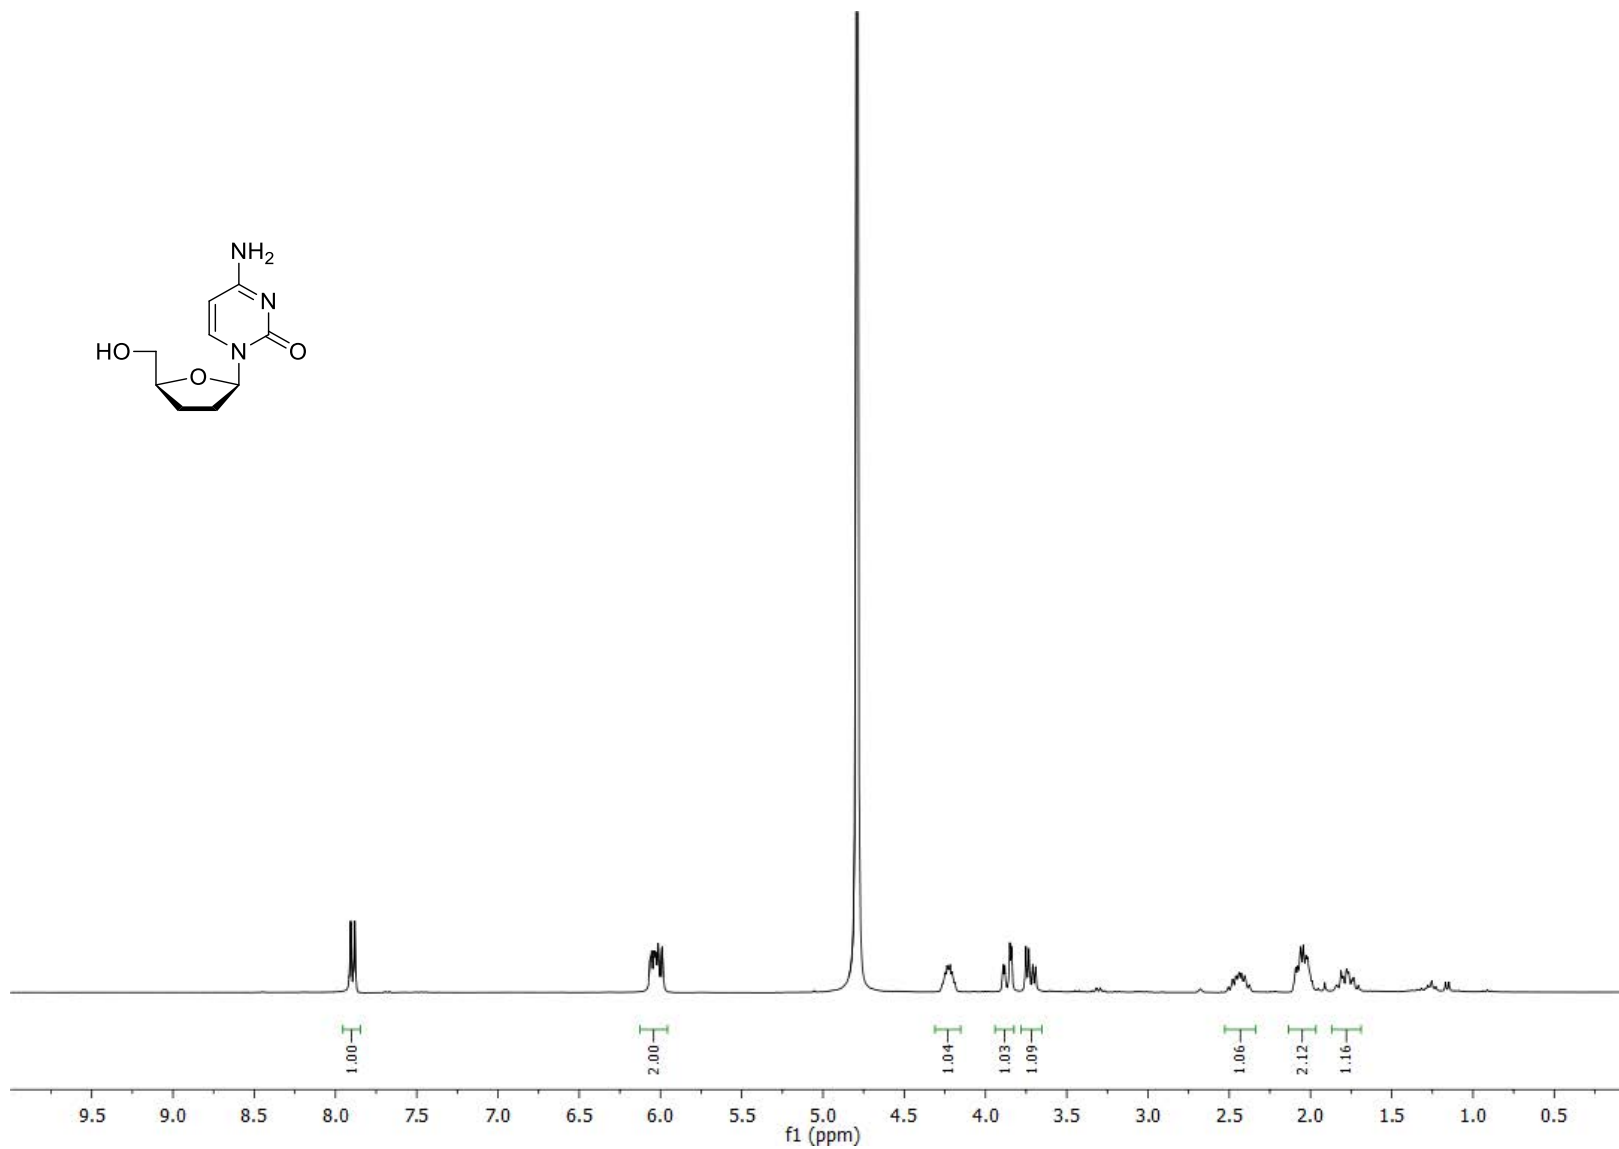

S146

## 2',3'-Dideoxy-β-D-cytidine (9c)

$^{13}\text{C}$ -NMR (75.5 MHz,  $\text{D}_2\text{O}$ )

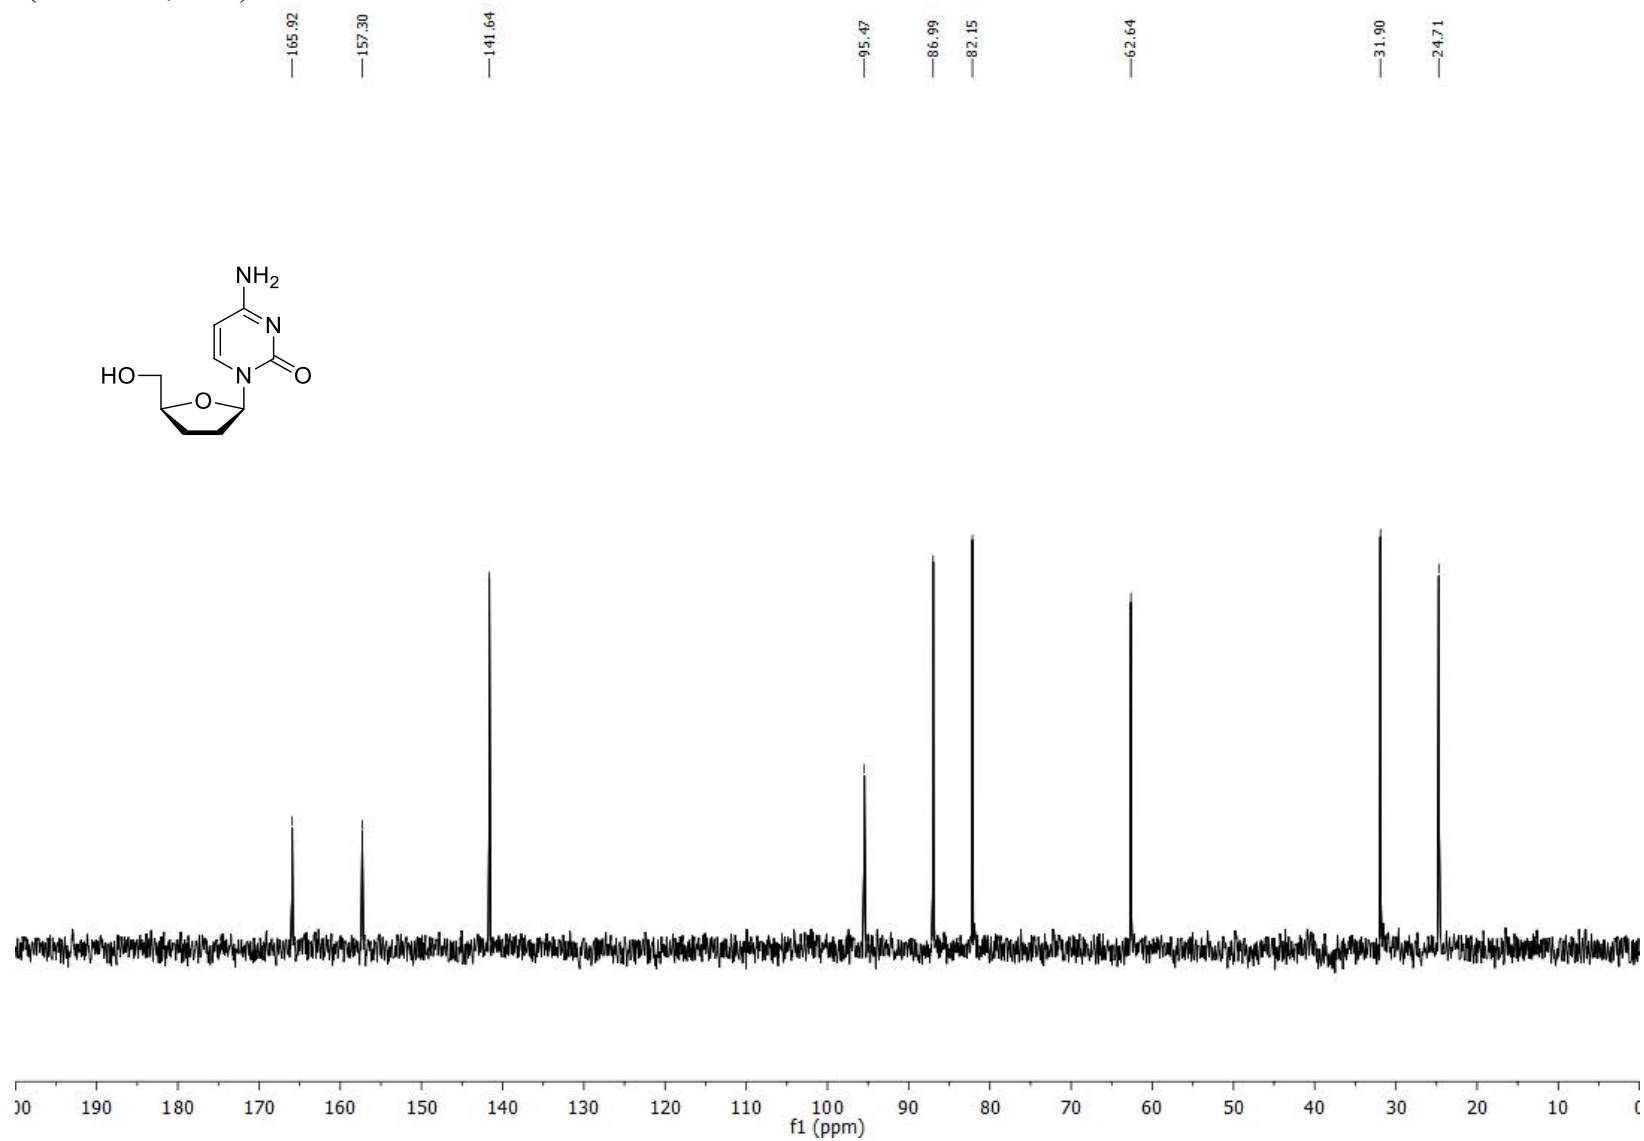

## 2',3'-Dideoxy- $\beta$ -D-cytidine (9c)

DEPT (75.5 MHz, D<sub>2</sub>O)

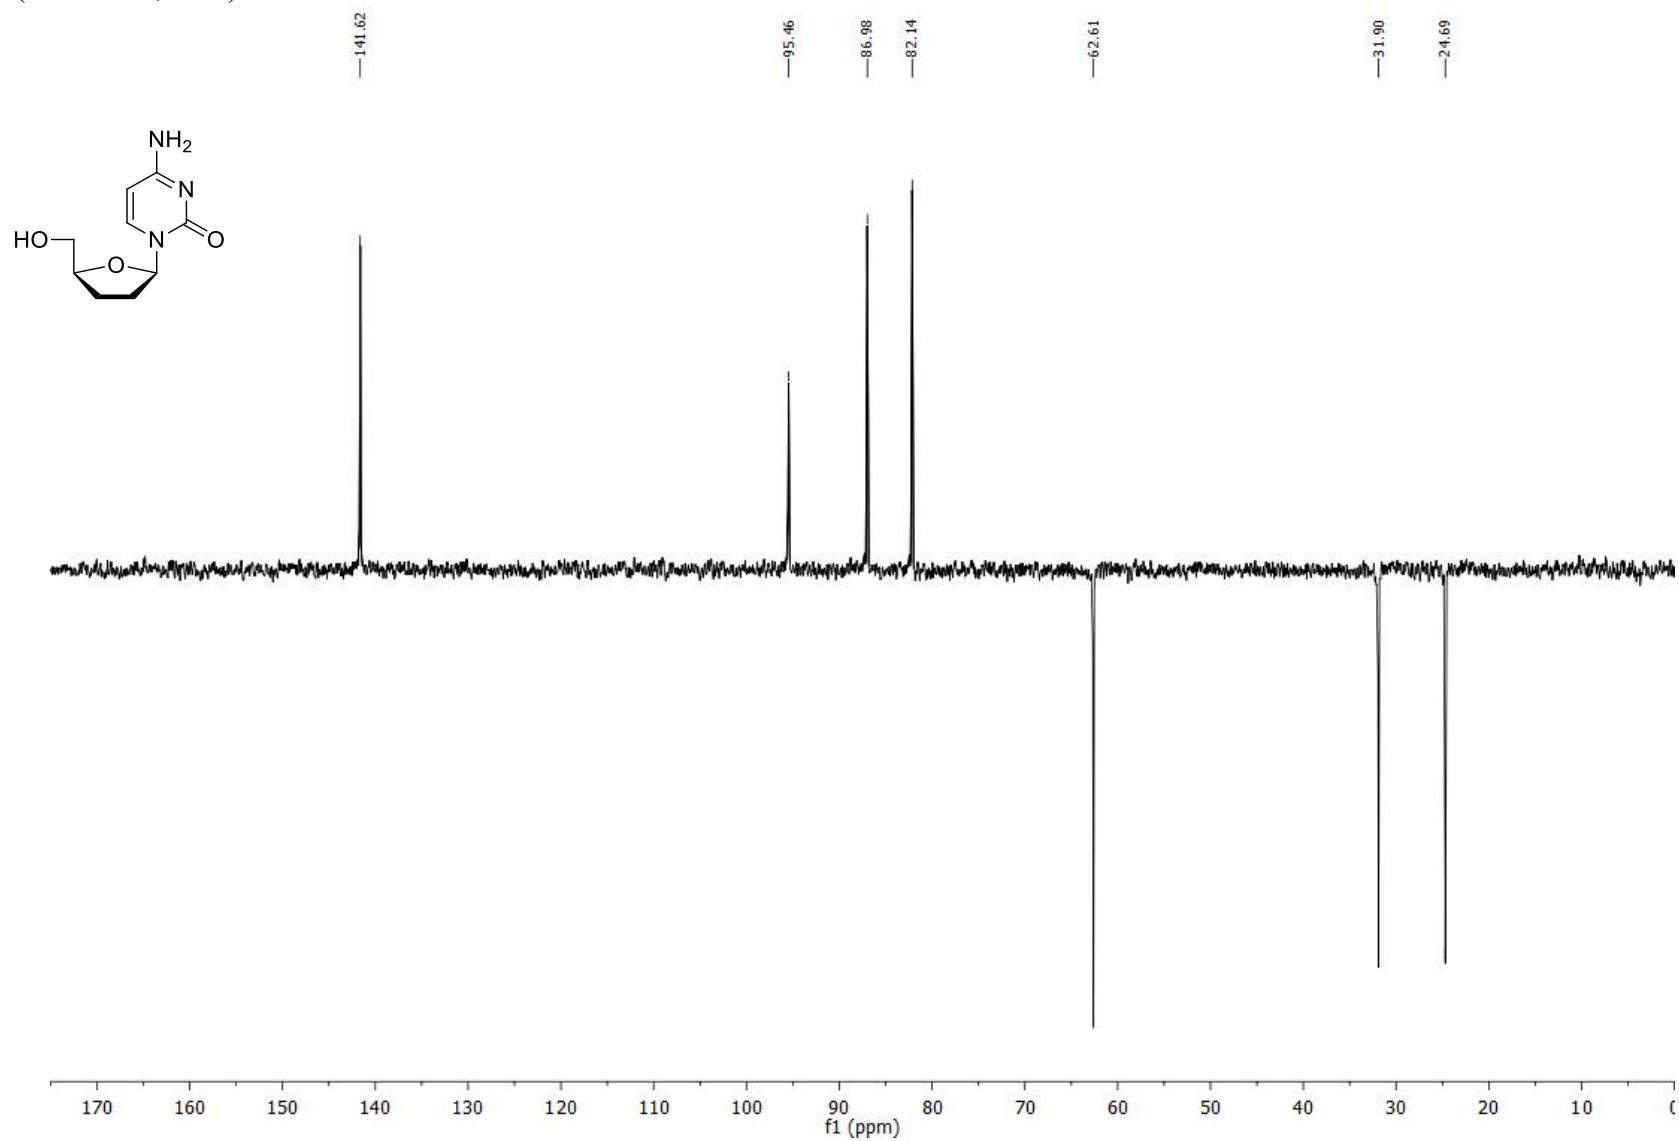

### 2',3'-Dideoxy-β-D-cytidine (9c)

COSY NMR (D<sub>2</sub>O)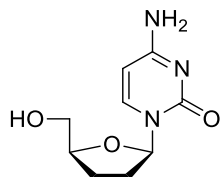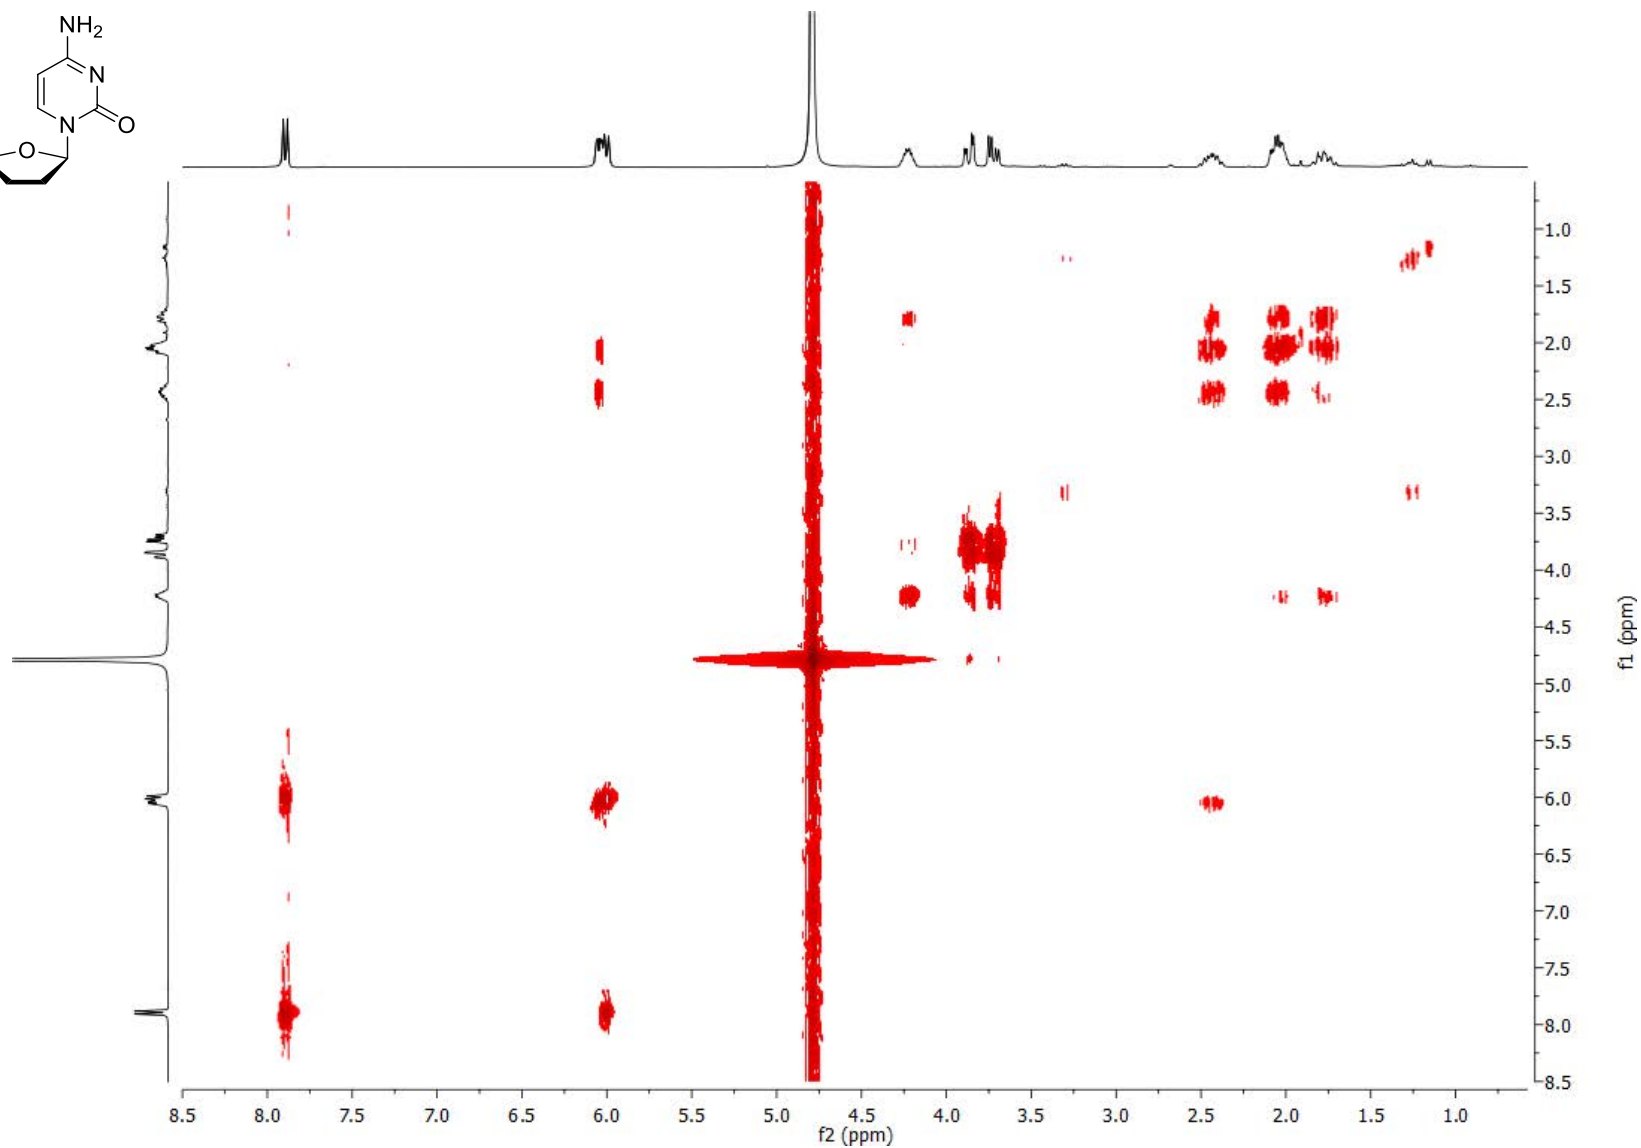

S149

## 2',3'-Dideoxy- $\beta$ -D-cytidine (9c)

HSQC NMR ( $D_2O$ )

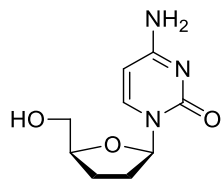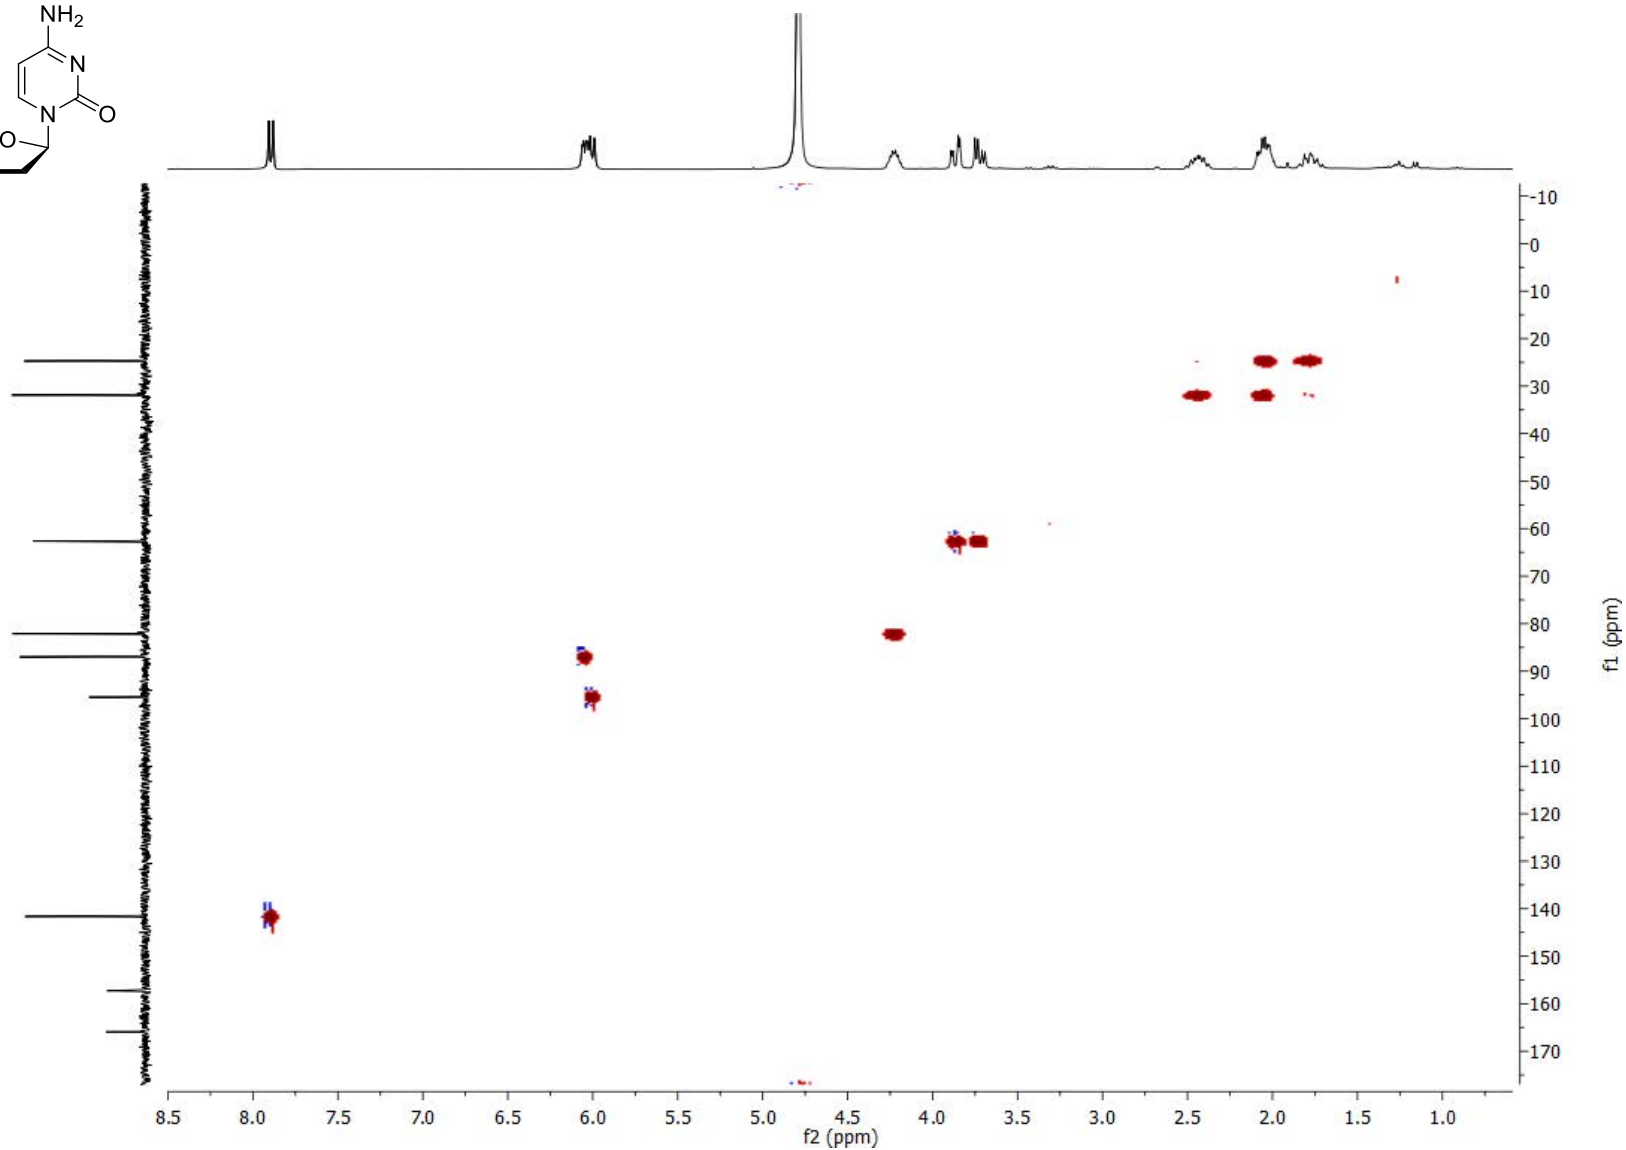

S150

## 2',3'-Dideoxy- $\beta$ -D-cytidine (9c)

HMBC NMR (D<sub>2</sub>O)

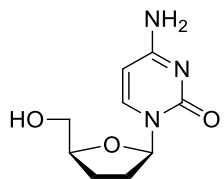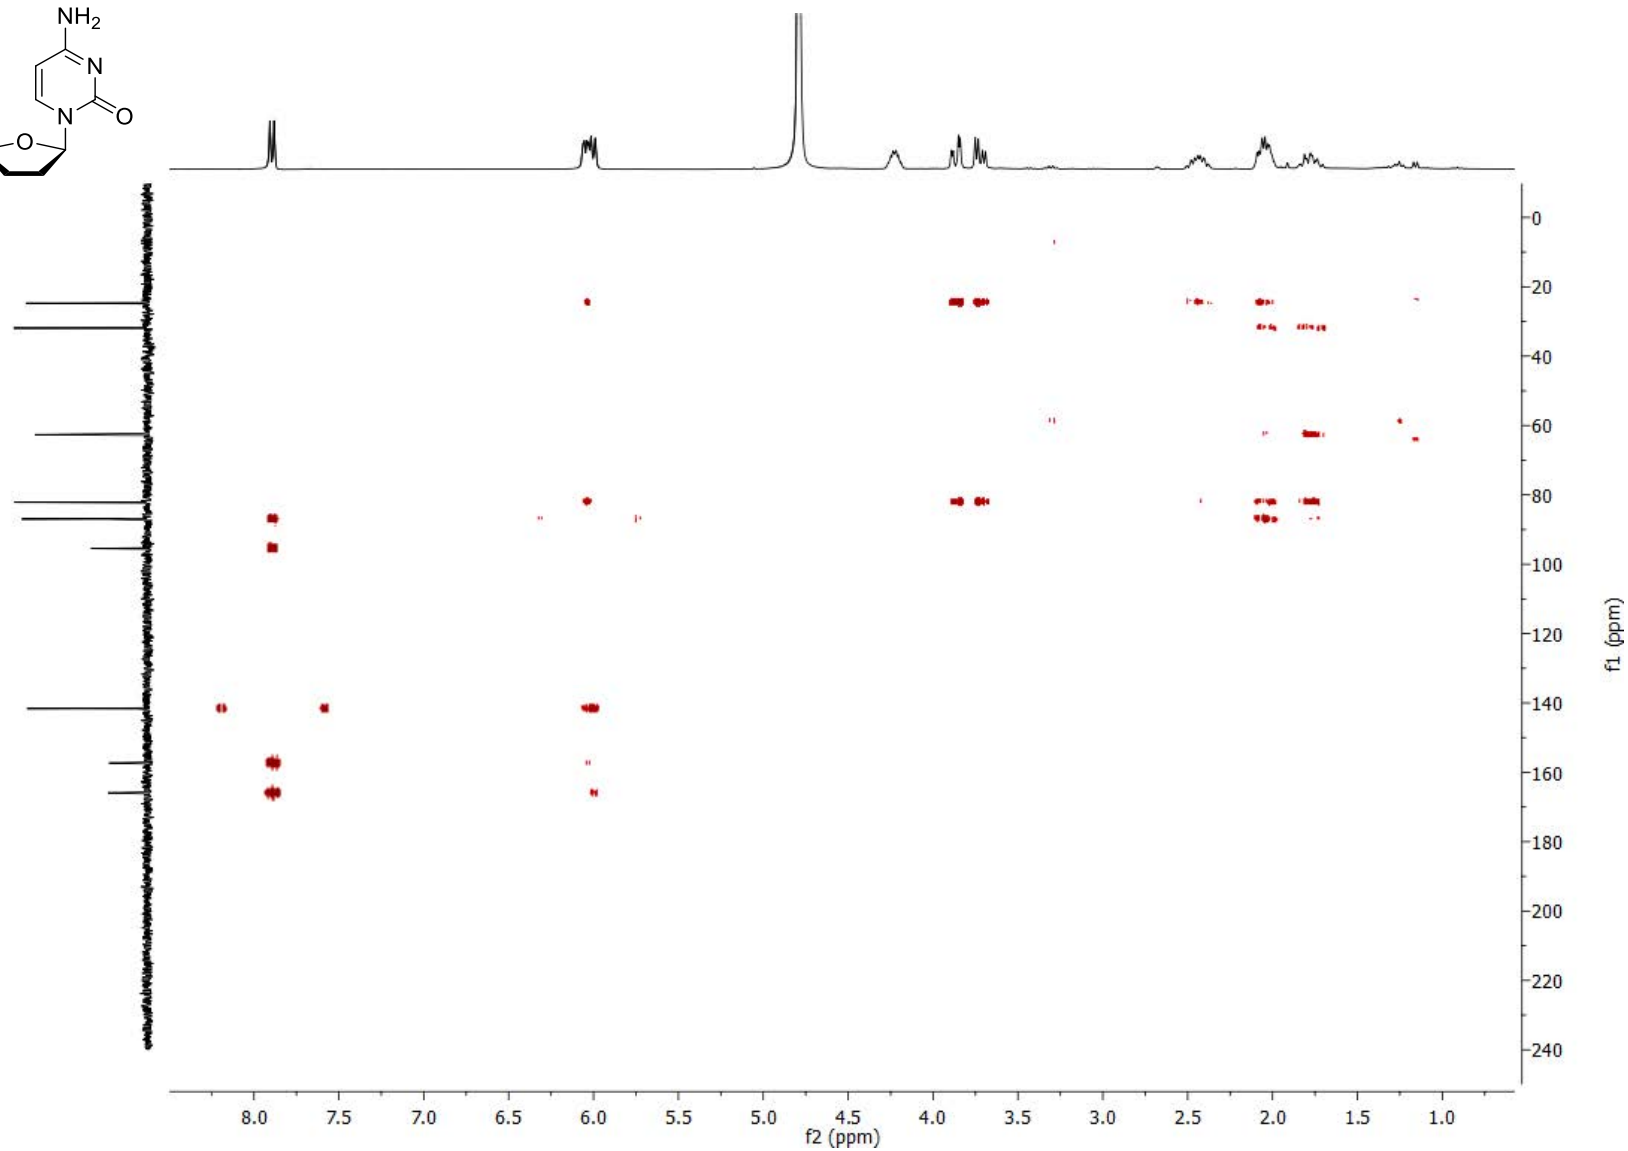

S151

## 2',3'-Dideoxy- $\beta$ -D-adenosine (9e)

$^1\text{H}$ -NMR (300.13 MHz,  $\text{MeOH-}d_4$ )

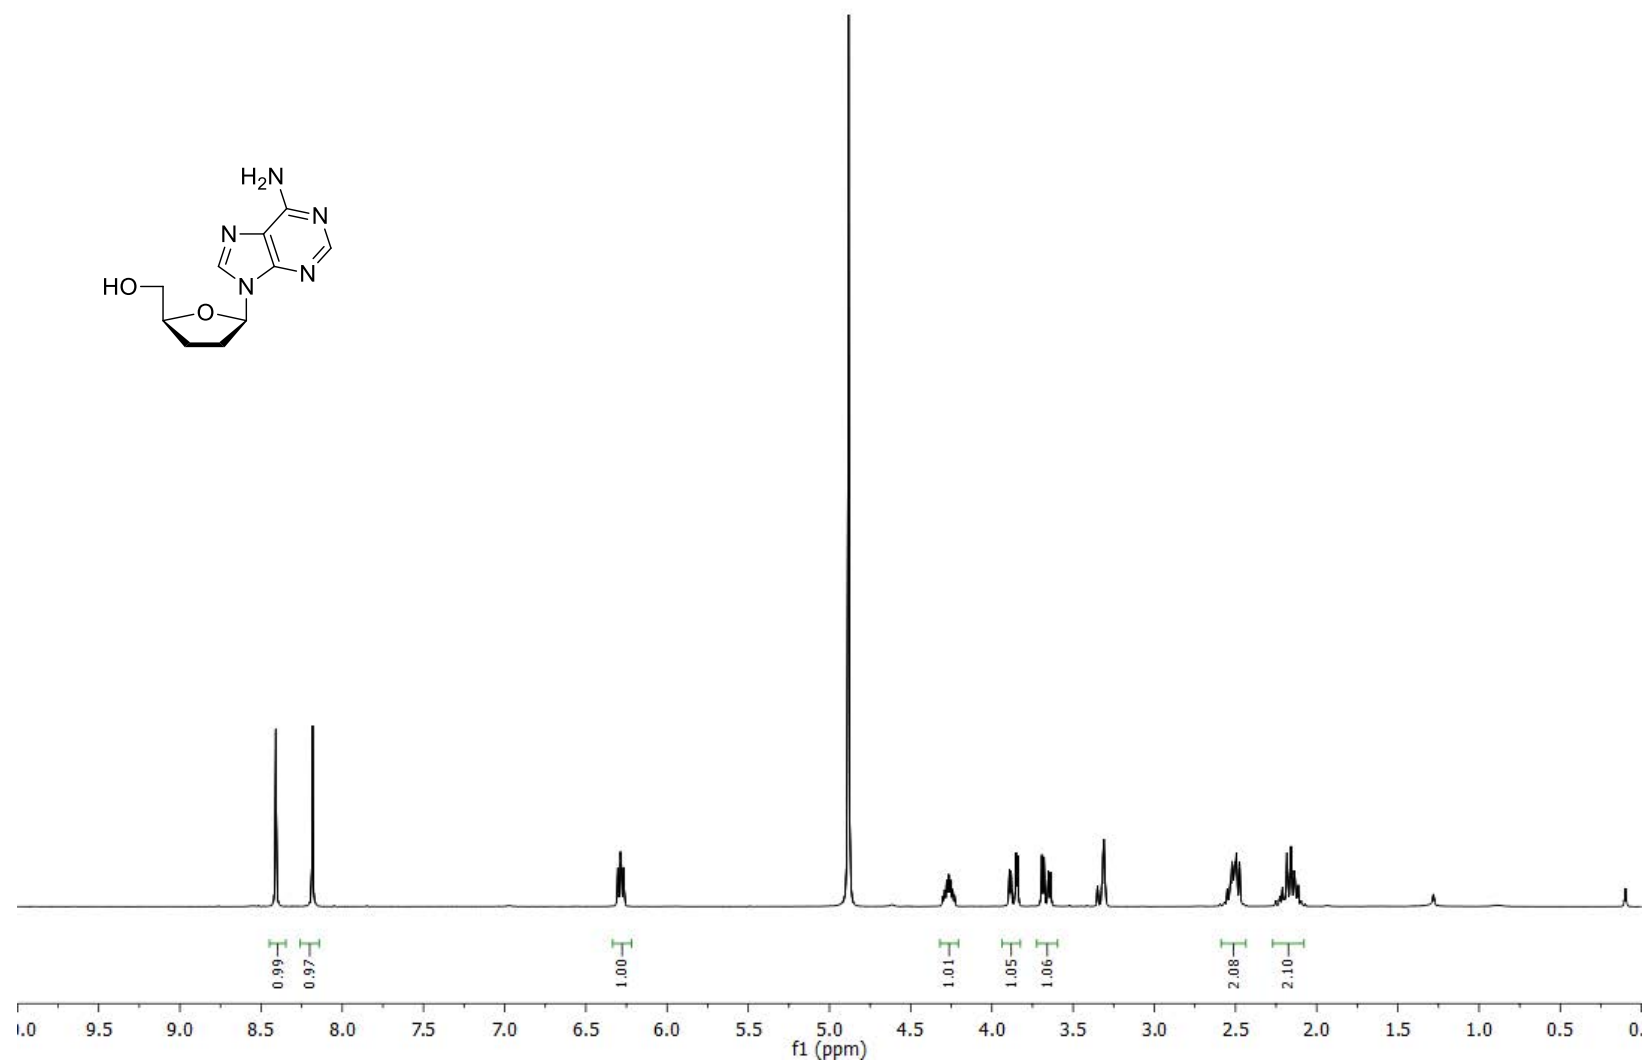

S152



## 2',3'-Dideoxy- $\beta$ -D-adenosine (9e)

$^{13}\text{C}$ -NMR (75.5 MHz,  $\text{MeOH-}d_4$ )

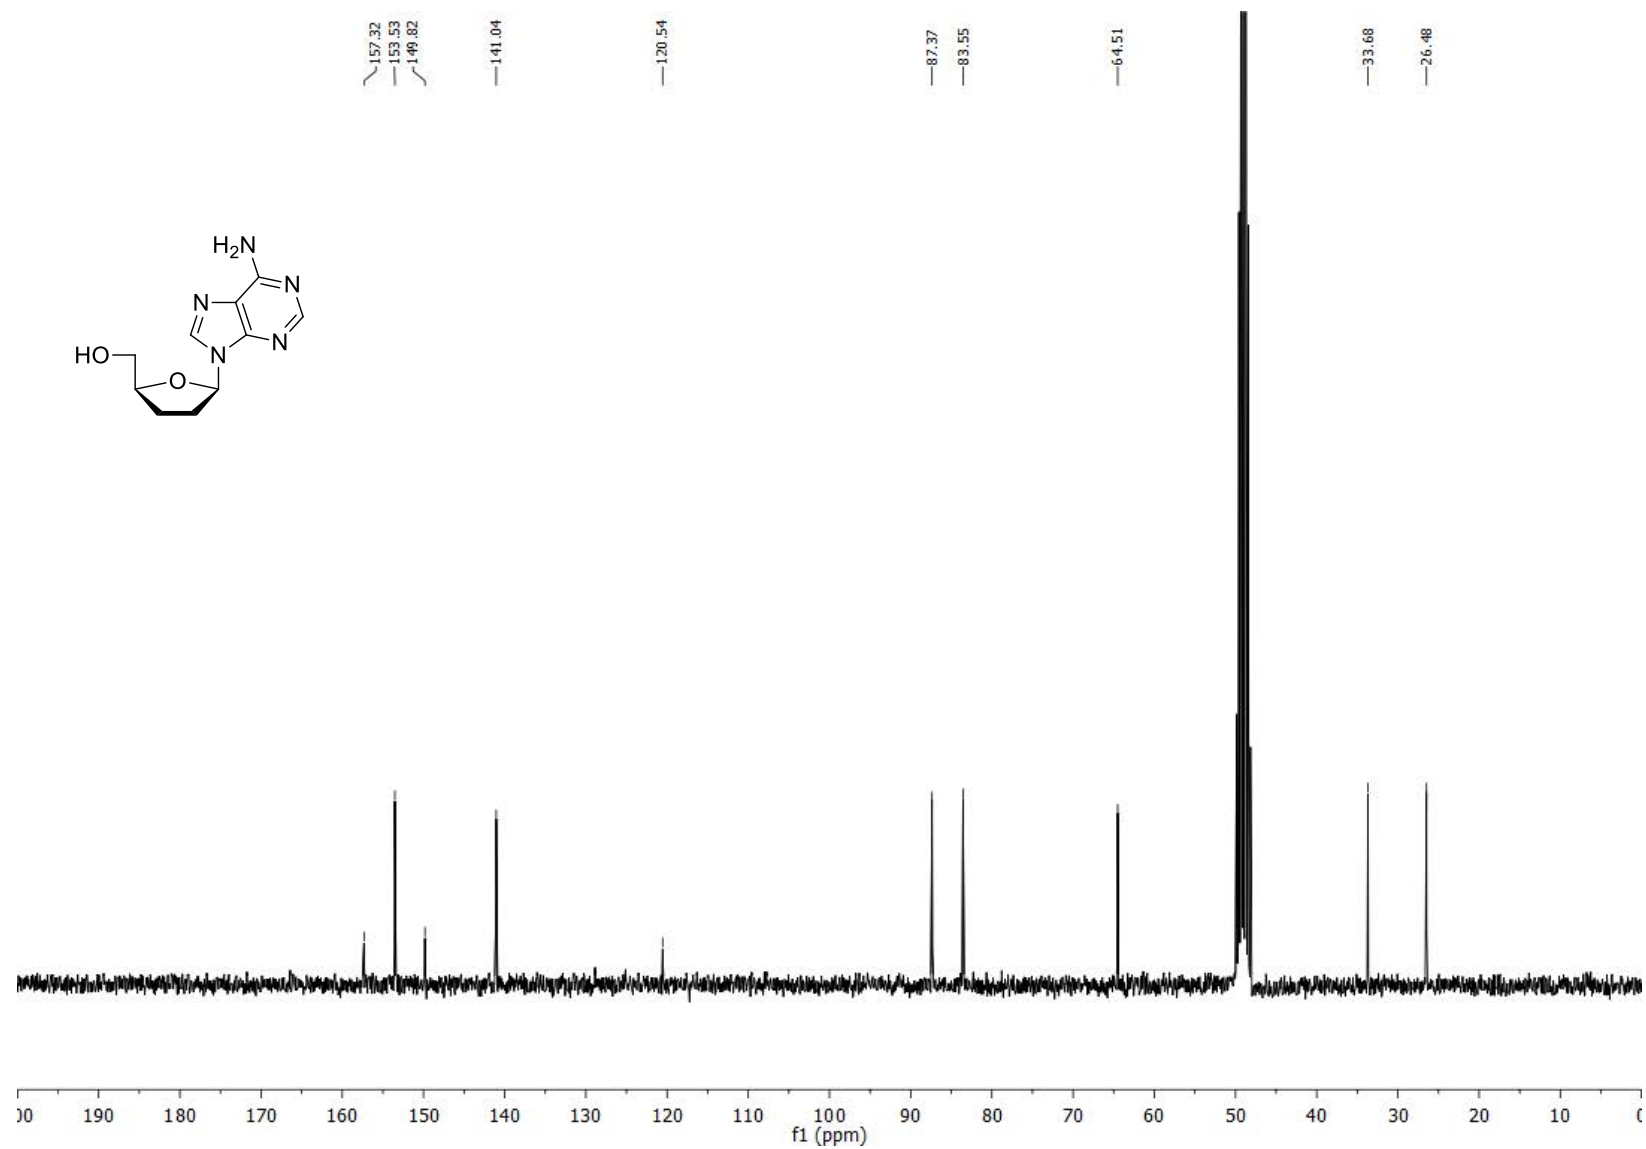

S153

## 2',3'-Dideoxy- $\beta$ -D-adenosine (9e)

DEPT NMR (75.5 MHz, MeOH- $d_4$ )

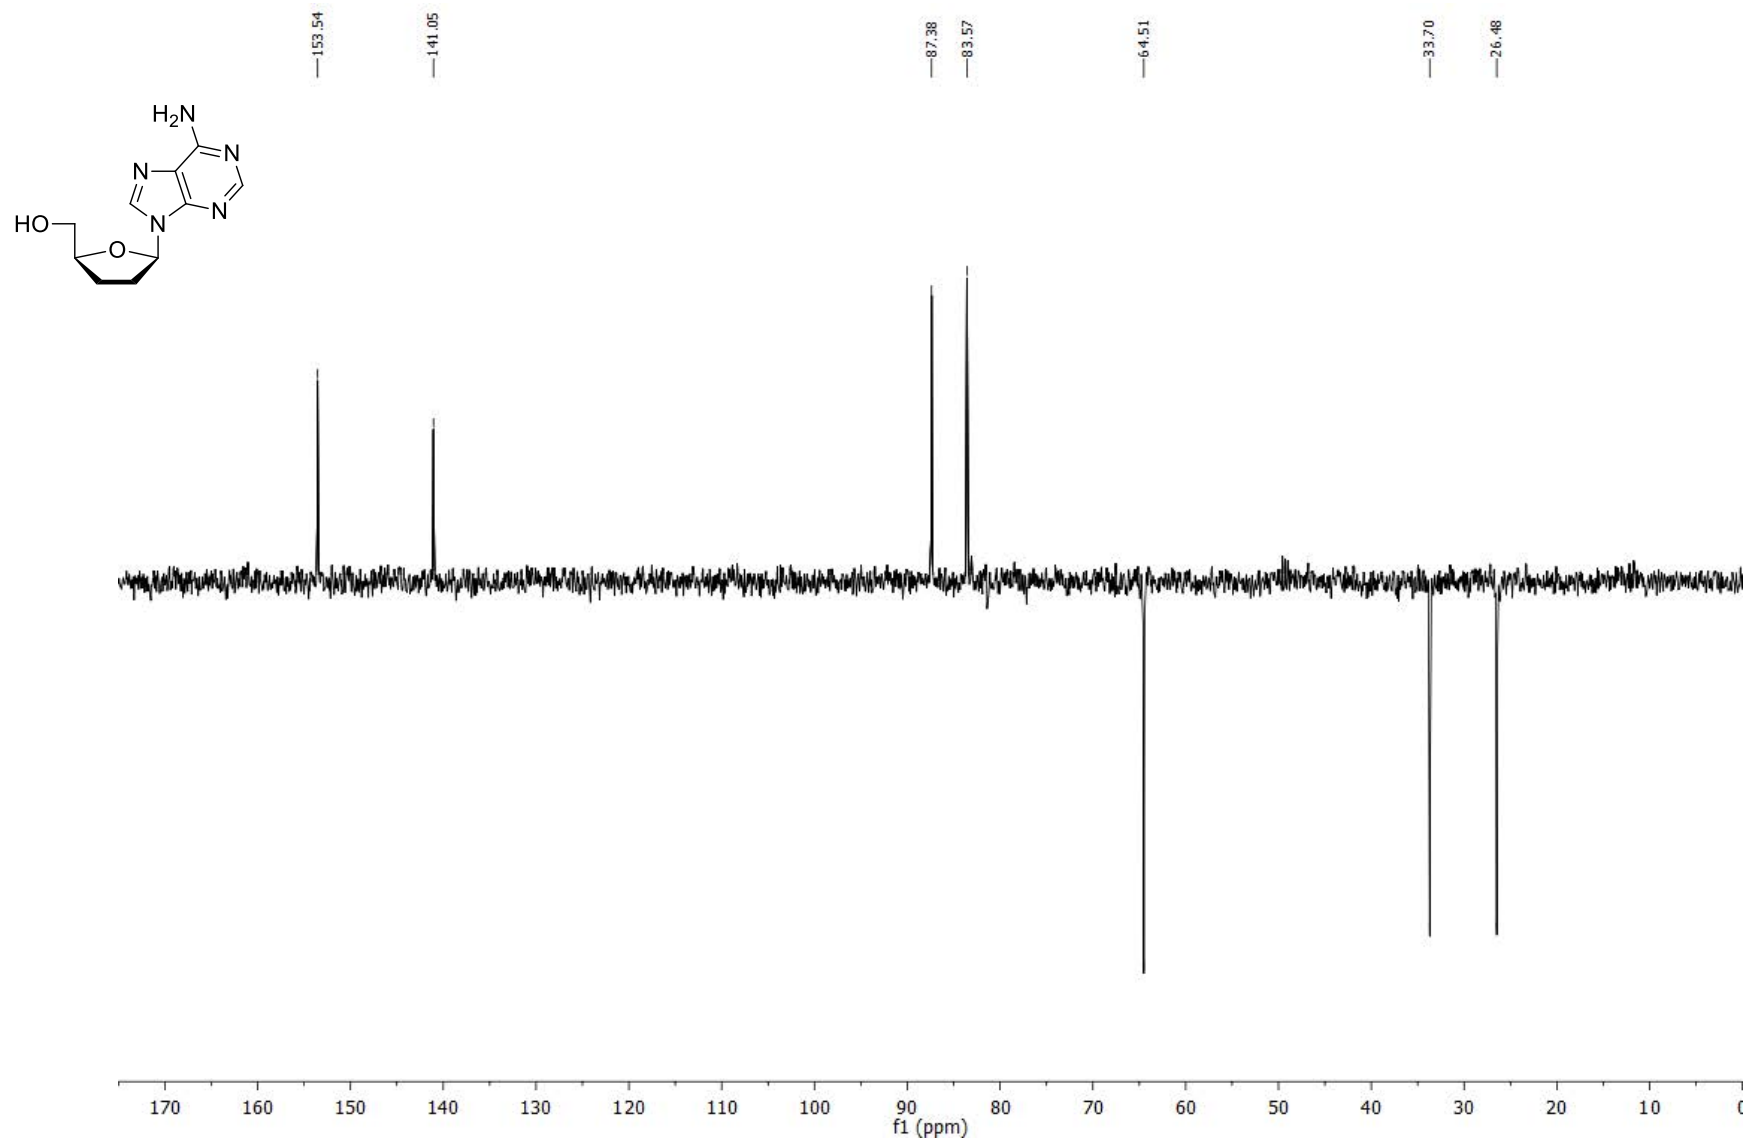

## 2',3'-Dideoxy- $\beta$ -D-adenosine (9e)

COSY NMR (MeOH- $d_4$ )

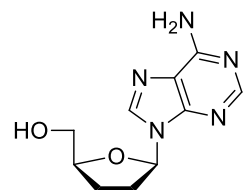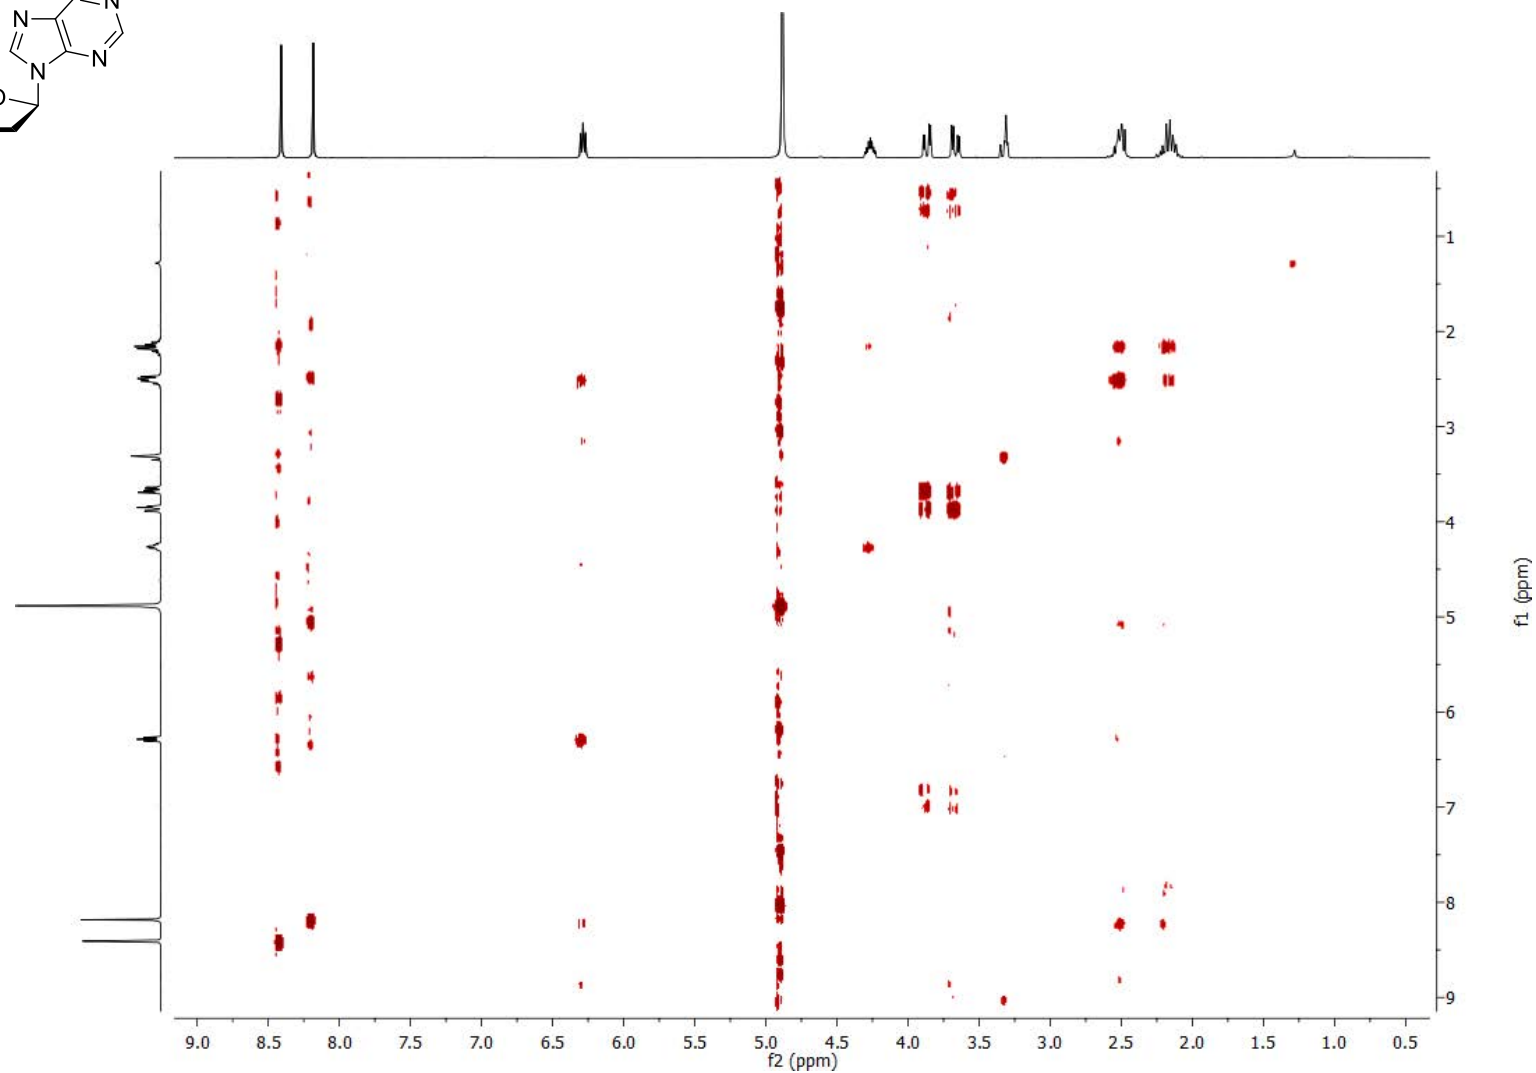

## 2',3'-Dideoxy- $\beta$ -D-adenosine (9e)

HSQC NMR (MeOH- $d_4$ )

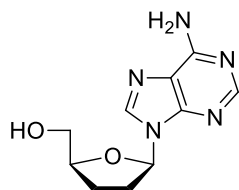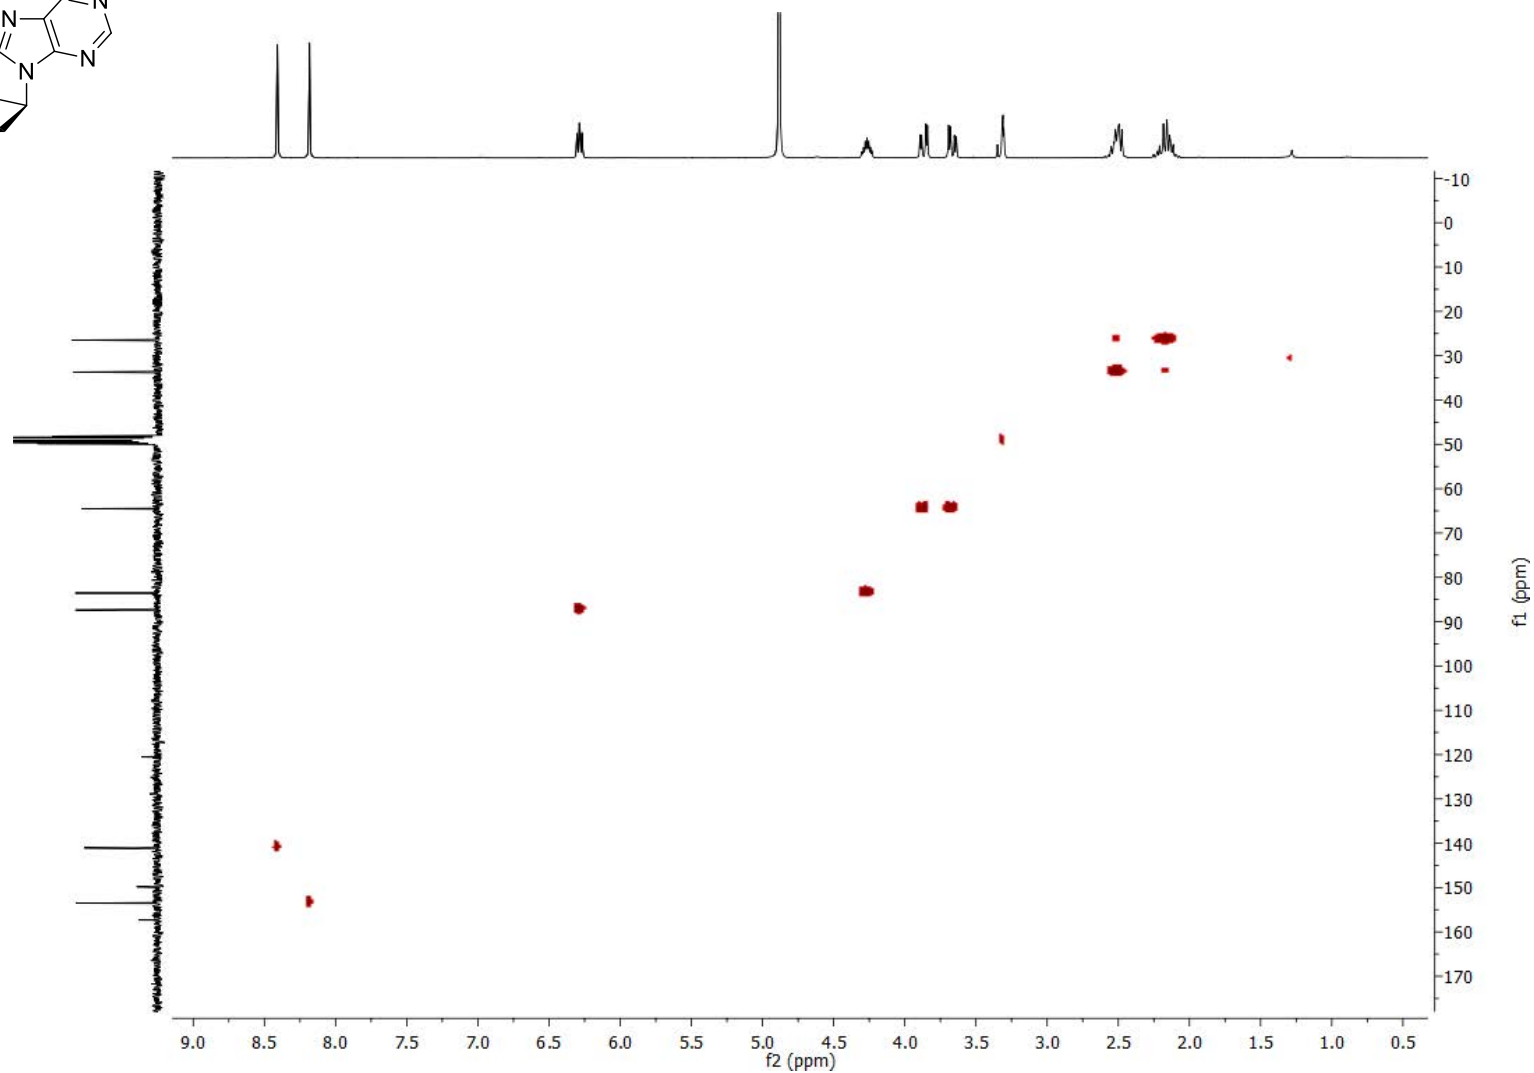

S156

## 2',3'-Dideoxy- $\beta$ -D-adenosine (9e)

HMBC NMR (MeOH- $d_4$ )

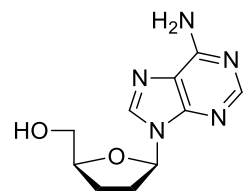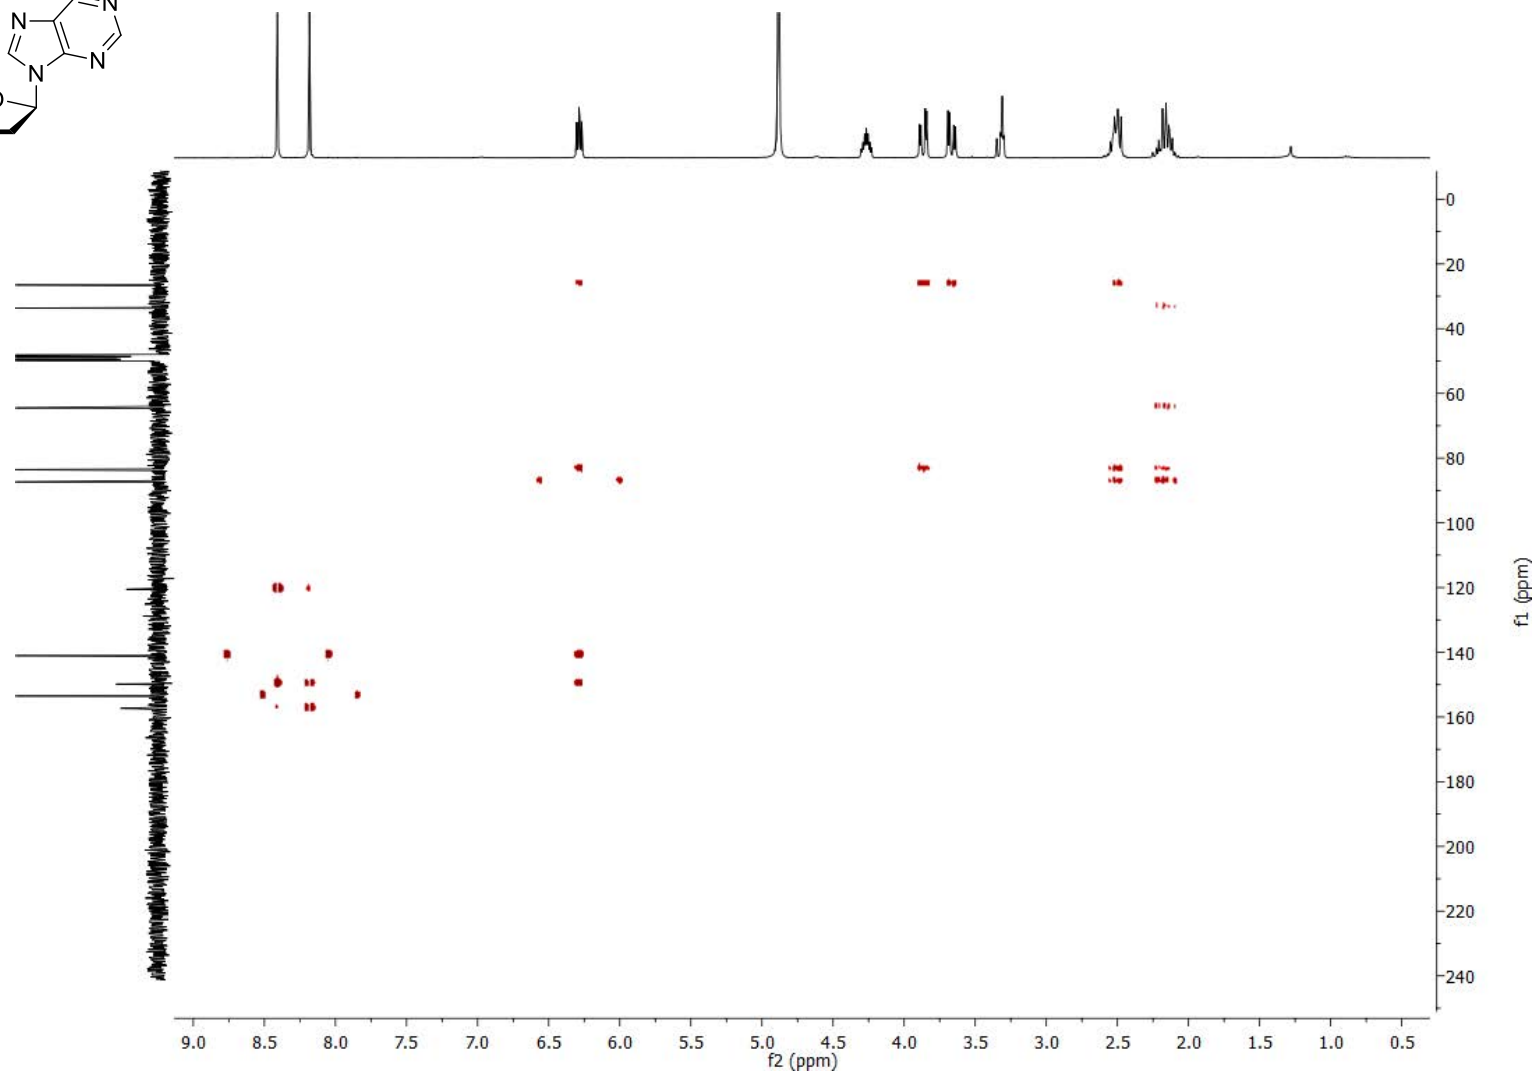

## 2',3'-Dideoxy- $\beta$ -D-inosine (9f)

$^1\text{H-NMR}$  (300.13 MHz,  $\text{MeOH-}d_4$ )

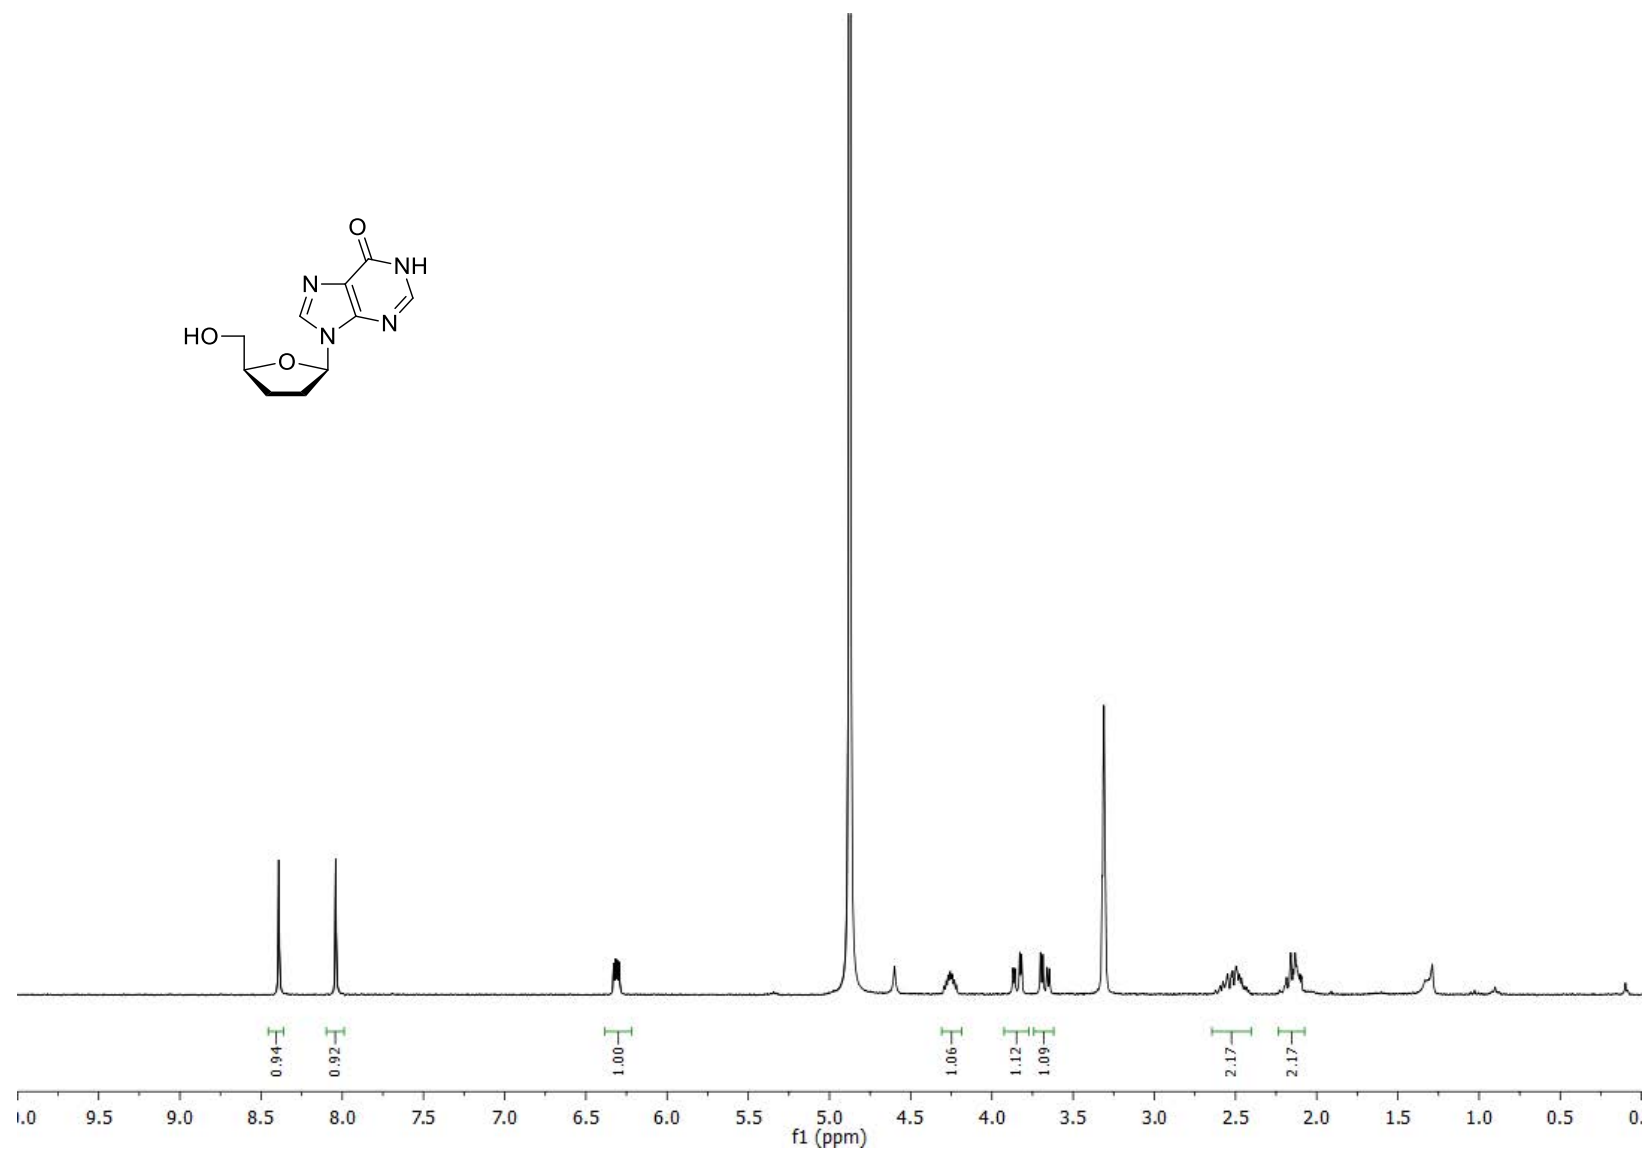

S158

## 2',3'-Dideoxy- $\beta$ -D-inosine (9f)

$^{13}\text{C}$ -NMR (75.5 MHz,  $\text{MeOH-}d_4$ )

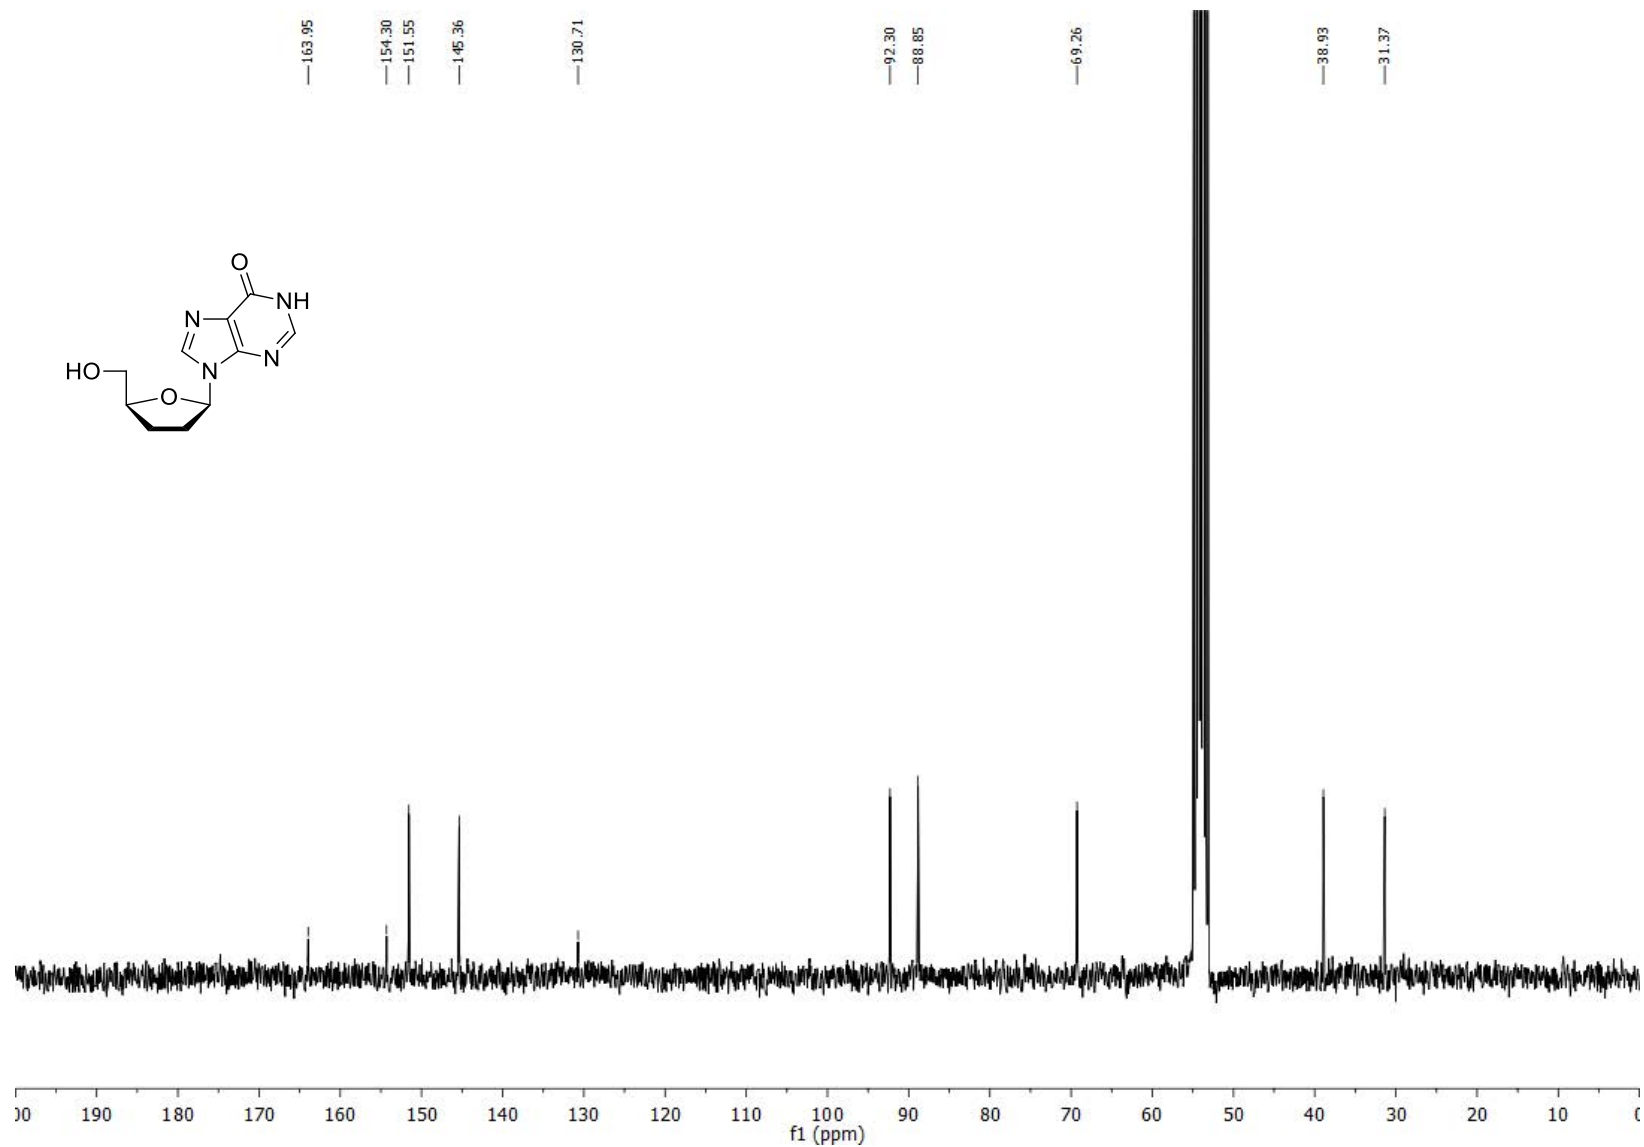

S159

## 2',3'-Dideoxy- $\beta$ -D-inosine (9f)

COSY NMR (MeOH- $d_4$ )

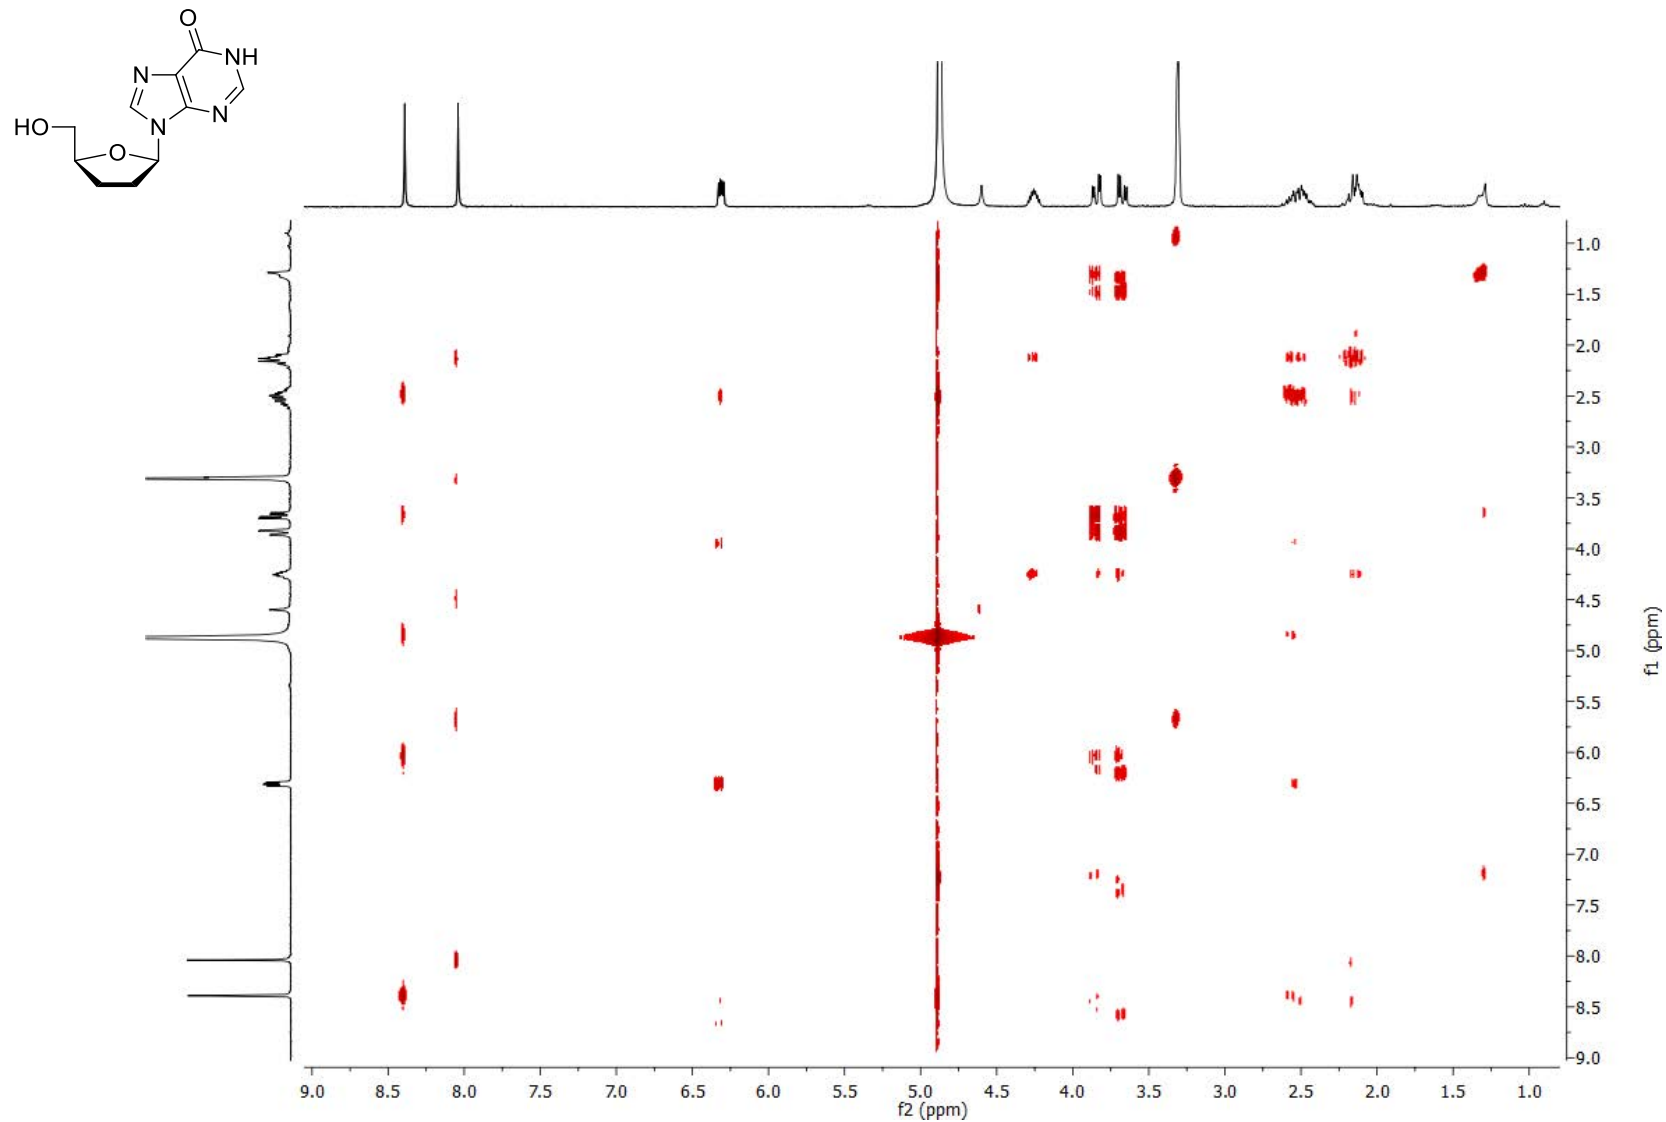



## 2',3'-Dideoxy- $\beta$ -D-inosine (9f)

HSQC NMR (MeOH- $d_4$ )

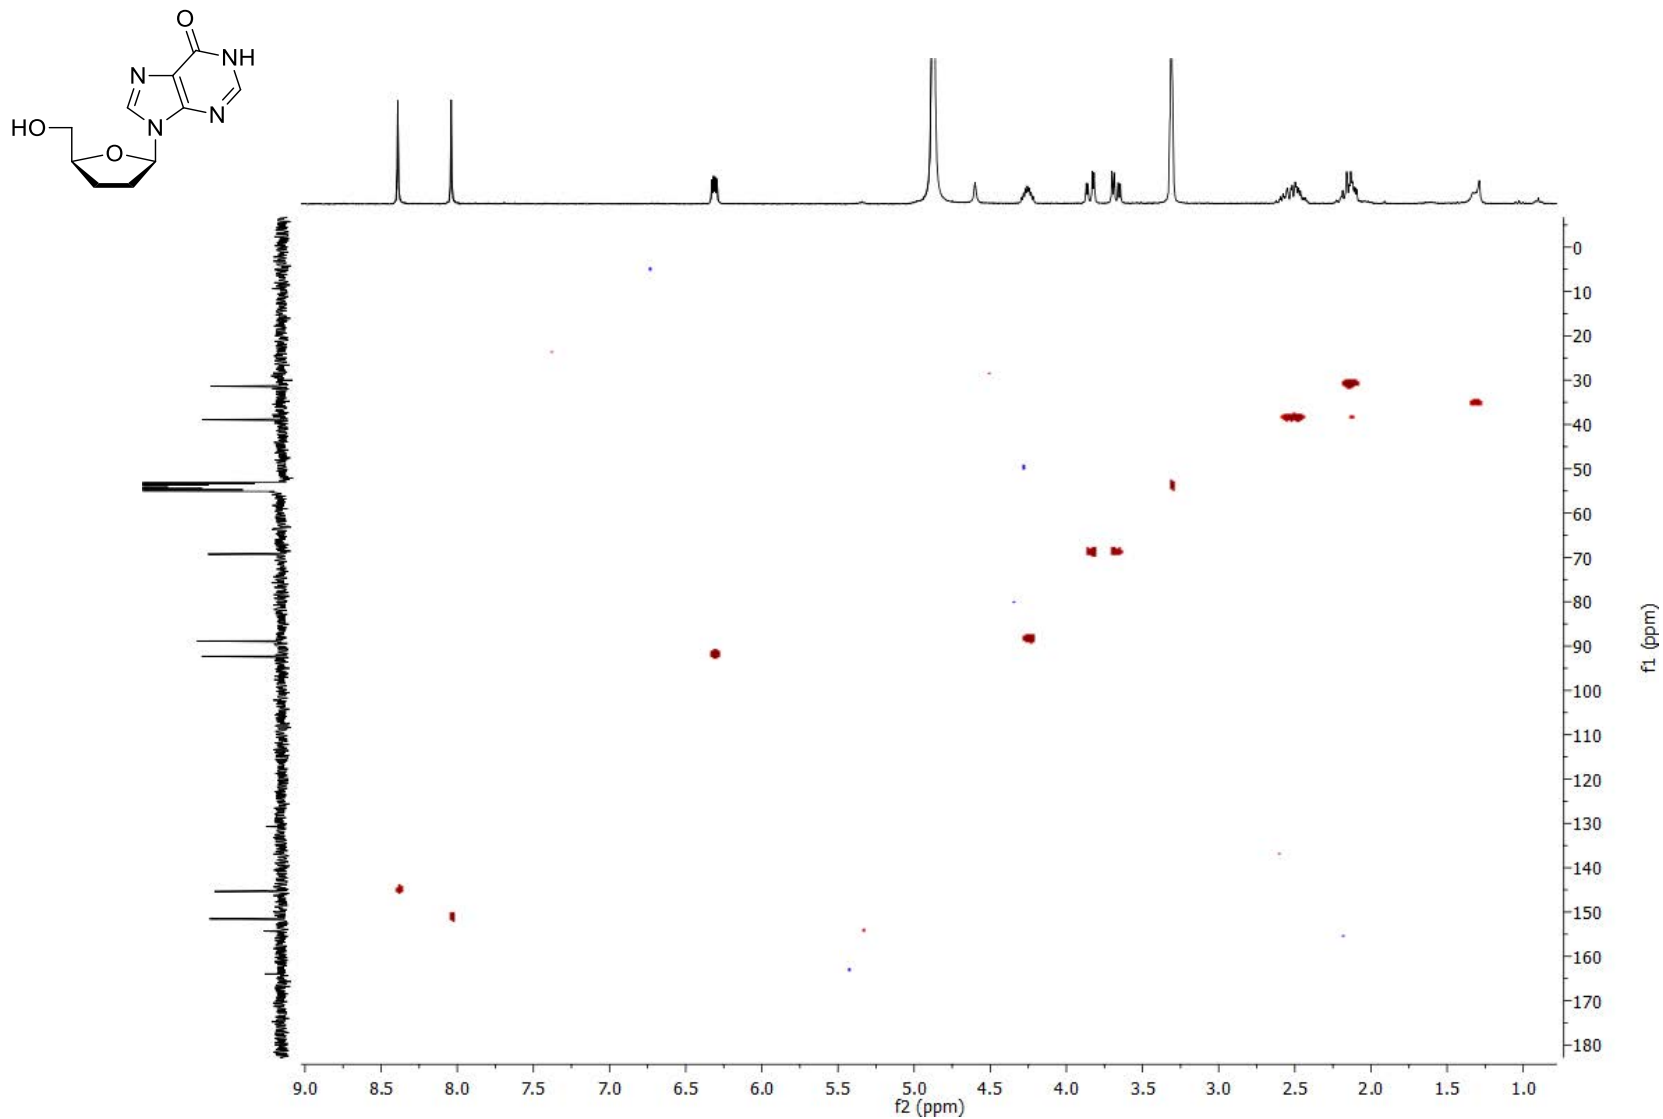

S161

## 2',3'-Dideoxy- $\beta$ -D-inosine (9f)

HMBC NMR (MeOH- $d_4$ )

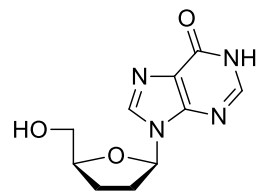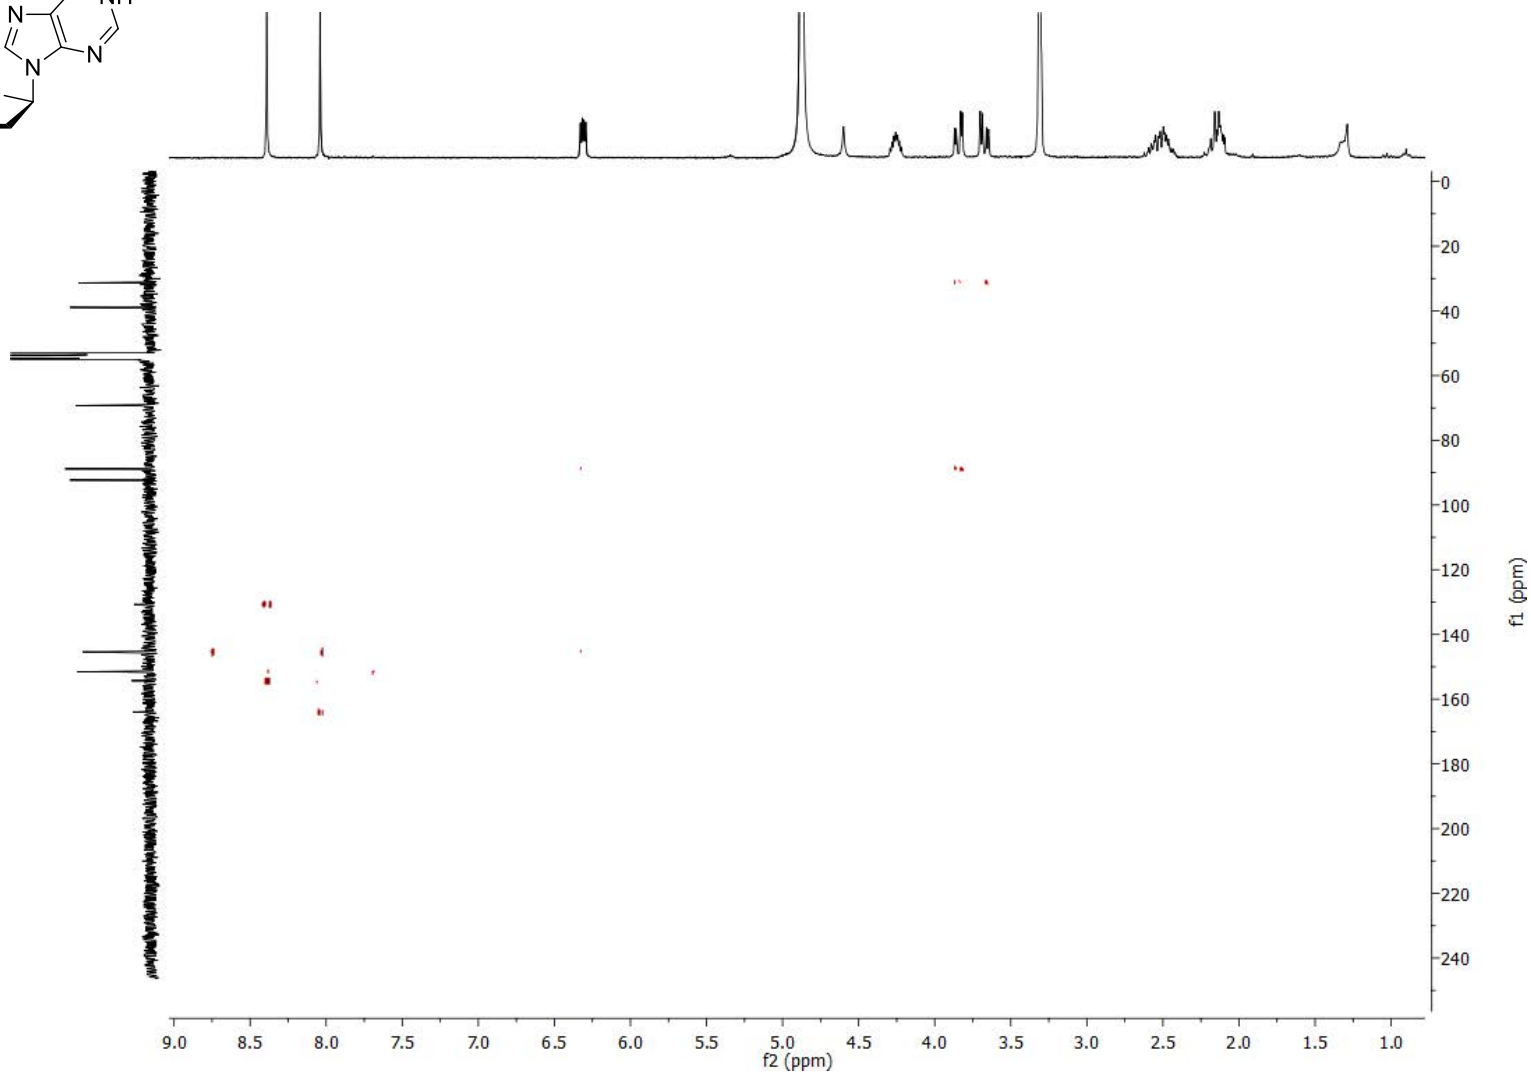

Supplement: s1 [file s1]
